# Supplementary material for: Silver-catalyzed nitration/annulation of 2-alkynylanilines for a tunable synthesis of nitrated indoles and indazole-2-oxides
Source: Royal Society of Chemistry journal article supplement (doi:10.1039/c9qo00715f), 2019-01-01
Supplement: c9qo00715f1.pdf [file c9qo00715f1.pdf]

## Supporting Information

### Silver-catalyzed nitration/annulation of 2-alkynylanilines for tunable synthesis of nitrated indoles and indazole-2-oxides

Tian-Shu Zhang,<sup>a</sup> Rong Wang,<sup>b</sup> Pei-Jun Cai,<sup>a,\*</sup> Wen-Juan Hao,<sup>b</sup> Shu-Jiang Tu,<sup>b</sup> Bo Jiang<sup>b,\*</sup>

<sup>a</sup>School of Chemical Engineering & Technology, China University of Mining and Technology, Xuzhou, 221116, P. R. China. E-mail: pjcai@cumt.edu.cn(PJC)

<sup>b</sup>School of Chemistry & Materials Science, Jiangsu Key Laboratory of Green Synthetic Chemistry for Functional Materials, Jiangsu Normal University, Xuzhou 221116, P. R. China. Email: jiangchem@jsnu.edu.cn (BJ) Fax: +8651683500065; Tel: +8651683500065

#### Context

|                                                                                           |          |
|-------------------------------------------------------------------------------------------|----------|
| General Information.....                                                                  | S2       |
| General Procedure for the Synthesis of Product <b>4</b> .....                             | S2-S3    |
| General Procedure for the Synthesis of Product <b>5</b> .....                             | S3-S4    |
| General Procedure for the Synthesis of Products <b>2</b> .....                            | S5       |
| Characterization Data of Compounds <b>2a-2ag</b> .....                                    | S5-S13   |
| General Procedure for the Synthesis of Products <b>3</b> .....                            | S13      |
| Characterization Data of Compounds <b>3a-3k</b> .....                                     | S13-S16  |
| Copies of <sup>1</sup> H NMR Spectra for Compound <b>1ab</b> .....                        | S17      |
| Copies of <sup>1</sup> H and <sup>13</sup> C NMR Spectra for Products <b>2a-2ag</b> ..... | S18-S84  |
| Copies of <sup>1</sup> H and <sup>13</sup> C NMR Spectra for Products <b>3a-3k</b> .....  | S85-S108 |

## General Information

$^1\text{H}$  NMR ( $^{13}\text{C}$  NMR) spectra were measured on a Bruker DPX 400 MHz spectrometer in  $\text{CDCl}_3$  ( $\text{DMSO-}d_6$ ) with chemical shift ( $\delta$ ) given in ppm relative to TMS as internal standard [(s = singlet, d = doublet, t = triplet, brs = broad singlet, m = multiplet), coupling constant (Hz)]. HRMS (APCI) was determined by using microTOF-QII HRMS/MS instrument (BRUKER). X-Ray crystallographic analysis was performed with a Siemens SMART CCD and a Siemens P4 diffractometer.

### 2-(4-bromophenyl)-1-(phenylsulfonyl)-1H-indol-5-amine (**4**)<sup>1</sup>

To a mixture of **2q** (0.24 mmol, 1 equiv) and iron powder (2.4 mmol, 10 equiv) in a round bottom flask, 2 mL of EtOH and 0.5 mL of water was added along with 45  $\mu\text{L}$  of conc. HCl. The resulting mixture was allowed to reflux at 80  $^\circ\text{C}$  for 2 h. After cooling at room temperature, the reaction mixture was washed with  $\text{NaHCO}_3$  solution and extracted with ethyl acetate. Column chromatographic purification using 40% ethyl acetate/hexane yields **4** as pale yellow solid.  $^1\text{H}$  NMR (400 MHz,  $\text{CDCl}_3$ ;  $\delta$ , ppm): 8.07 (d,  $J = 8.8$  Hz, 1H), 7.55 (d,  $J = 8.4$  Hz, 2H), 7.46-7.41 (m, 1H), 7.38-7.32 (m, 4H), 7.27 (s, 2H), 7.24 (d,  $J = 8.3$  Hz, 5H), 6.80-6.75 (m, 1H), 6.70 (d,  $J = 2.1$  Hz, 1H), 6.40 (s, 1H);  $^{13}\text{C}$  NMR (100 MHz,  $\text{CDCl}_3$ ;  $\delta$ , ppm): 141.7, 136.9, 133.5, 132.3, 132.0, 131.5, 131.3, 130.8, 128.5, 126.7, 123.0, 117.8, 114.5, 114.4, 105.9.

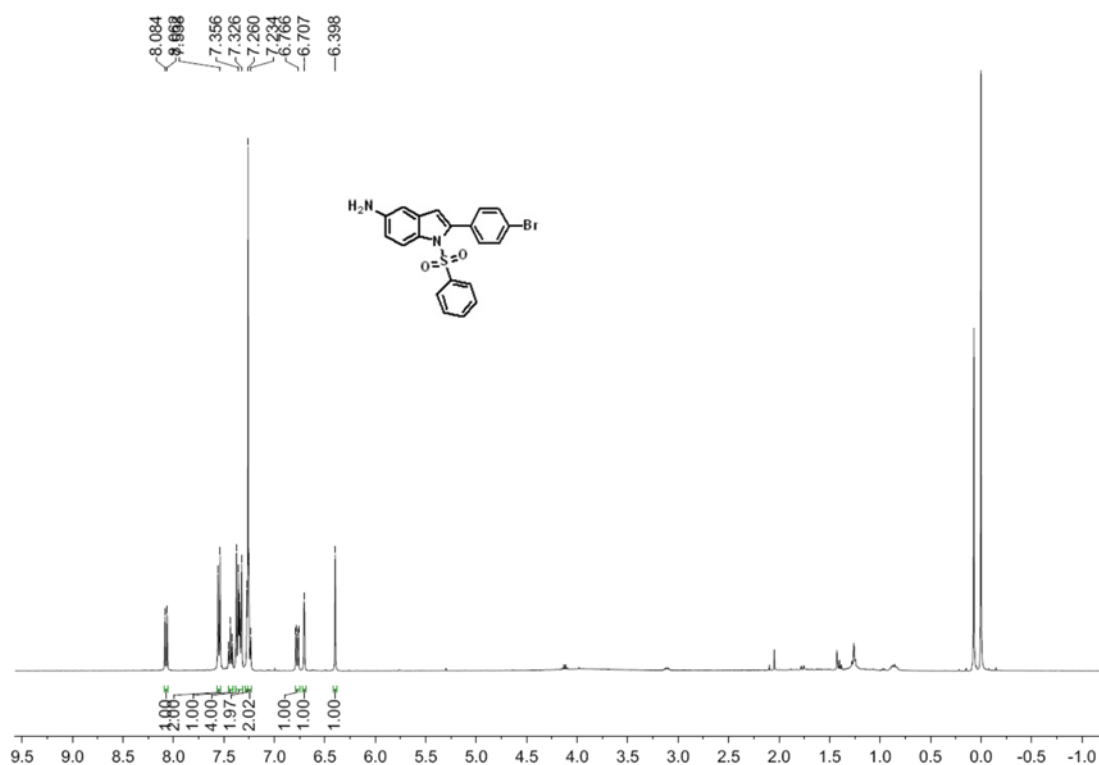

$^1\text{H}$  NMR Spectrum of Compound **4**

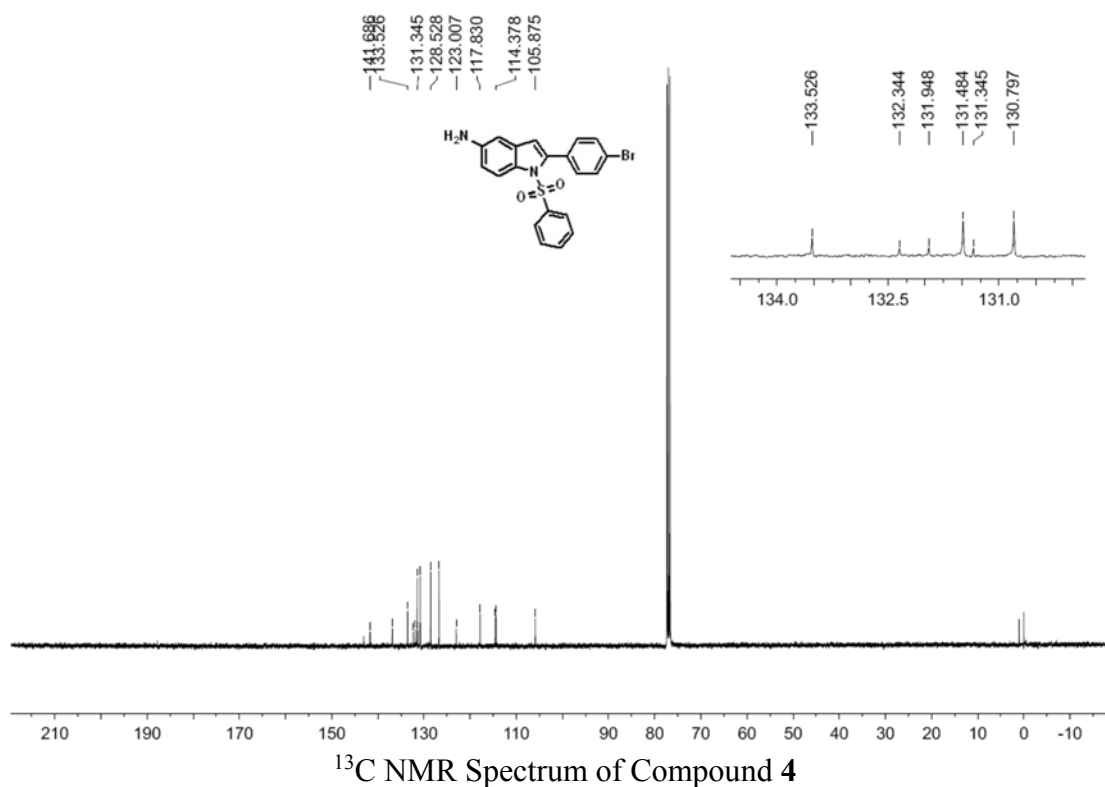

<sup>13</sup>C NMR Spectrum of Compound 4

***N*-(2-(4-bromophenyl)-1-(phenylsulfonyl)-1H-indol-5-yl)-4-chlorobenzenesulfonamide (5)<sup>2</sup>**

To a stirred solution of compound **2q** (0.20 mmol) in DMSO (2 mL), NaHSO<sub>3</sub> (0.60 mmol), FeCl<sub>2</sub> (0.02 mmol), *N,N*-dimethyl-1,2-ethanediamine (4 μL, 0.04 mmol) and sodium 4-chlorobenzene sulfinate (0.30 mmol) were added sequentially. The mixture was stirred at 60 °C for 12 h in a sealed tube under N<sub>2</sub> atmosphere. After cooling to room temperature, water (8 mL) was added, the aqueous phase was extracted with DCM. The combined organic phase was washed with saturated brine, dried over anhydrous sodium sulfate, and concentrated. The residue was purified on a silica gel column with petroleum ether/ethyl acetate (2/1) as the eluent to afford the corresponding product **5** as a white solid. <sup>1</sup>H NMR (400 MHz, CDCl<sub>3</sub>; δ, ppm): 8.16 (d, *J* = 8.9 Hz, 1H), 7.61 (d, *J* = 8.5 Hz, 2H), 7.56 (d, *J* = 8.3 Hz, 2H), 7.51-7.47 (m, 1H), 7.38-7.34 (m, 3H), 7.33-7.27 (m, 5H), 6.98-6.93 (m, 1H), 6.61 (s, 1H), 6.48 (s, 1H); <sup>13</sup>C NMR (100 MHz, CDCl<sub>3</sub>; δ, ppm): 142.3, 139.6, 137.3, 137.1, 136.3, 133.9, 132.6, 131.7, 131.2, 130.9, 130.6, 129.3, 128.7, 128.7, 126.7, 123.5, 120.2, 117.4, 115.0, 113.6.

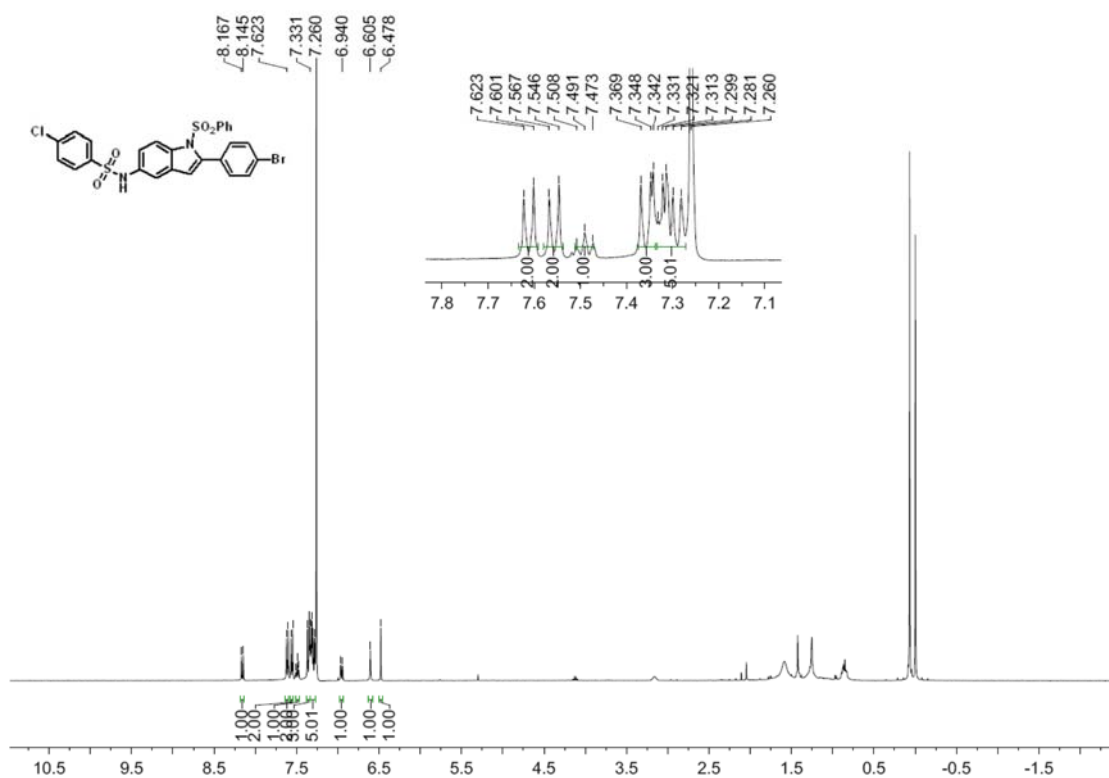

<sup>1</sup>H NMR Spectrum of Compound 5

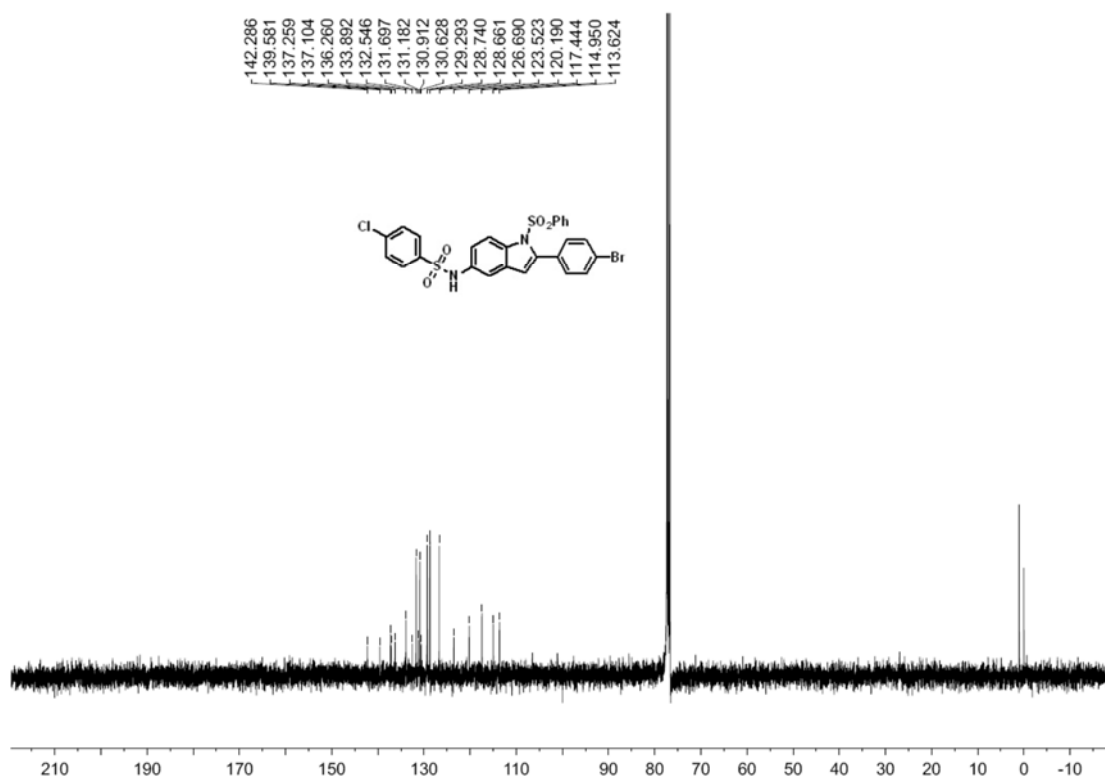

<sup>13</sup>C NMR Spectrum of Compound 5

## References

- 1 Z. Hu, J. Dong, Y. Men, Y. Li and X. Xu, *Chem. Commun.*, 2017, **53**, 1739.
- 2 W. Zhang, J. Xie, B. Rao and M. Luo, *J. Org. Chem.*, 2015, **80**, 3504.

## General Procedure for the Synthesis of Products 2

### Example for the synthesis of 2a

A suspension of AgNO<sub>3</sub> (0.02 mmol, 0.1 equiv.), 4-chloro-*N*-(2-(phenylethynyl)phenyl)benzenesulfonamide **1a** (0.2 mmol, 1.0 equiv.) in 2.0 mL of 1,4-dioxane was stirred at 100 °C under air conditions. The *t*-BuONO (0.4 mmol, 2.0 equiv.) were sequentially added in a 25-mL reaction vial. The mixture was sealed and stirred for 8 hours until TLC (petroleum ether: ethyl acetate = 1:8, v/v) revealed that conversion of the starting material **1a** was completed. The reaction system was evaporated under vacuum and purified by flash column chromatography (silica gel, mixtures of petroleum ether / ethyl acetate = 1:25, v/v) to afford the desired product **2a**.

### 1-((4-chlorophenyl)sulfonyl)-5-nitro-2-phenyl-1H-indole (2a)

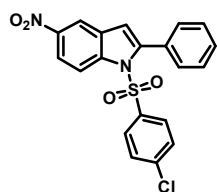

Light yellow solid, 78 mg, 95% yield; mp 155-156 °C. <sup>1</sup>H NMR (400 MHz, CDCl<sub>3</sub>; δ, ppm): 8.43 (d, *J* = 9.2 Hz, 1H), 8.40 (d, *J* = 2.4 Hz, 1H), 8.29-8.23 (m, 1H), 7.52-7.47 (m, 1H), 7.47-7.42 (m, 4H), 7.31-7.26 (m, 4H), 6.68 (s, 1H). <sup>13</sup>C NMR (100 MHz, CDCl<sub>3</sub>; δ, ppm): 144.91, 144.69, 141.07, 140.92, 135.72, 130.74, 130.57, 130.18, 129.63, 129.36, 128.24, 127.80, 119.96, 116.94, 116.50, 113.13. IR (KBr, ν, cm<sup>-1</sup>): 1580, 1520, 1447, 1385, 1344, 1185, 1054, 898, 760, 628, 577. HRMS (APCI-TOF, *m/z*): calcd for C<sub>20</sub>H<sub>14</sub>ClN<sub>2</sub>O<sub>4</sub>S [M+H]<sup>+</sup> 413.0357, found 413.0345.

### 1-((2,4-dichlorophenyl)sulfonyl)-5-nitro-2-phenyl-1H-indole (2b)

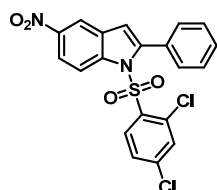

Light yellow solid, 79 mg, 88% yield; mp 152-153 °C. <sup>1</sup>H NMR (400 MHz, CDCl<sub>3</sub>; δ, ppm): 8.49 (d, *J* = 2.4 Hz, 1H), 8.36 (d, *J* = 9.2 Hz, 1H), 8.29-8.23 (m, 1H), 7.40-7.34 (m, 2H), 7.26-7.15 (m, 4H), 6.98-6.93 (m, 1H), 6.69 (s, 1H). <sup>13</sup>C NMR (100 MHz, CDCl<sub>3</sub>; δ, ppm): 144.3, 143.0, 141.7, 141.0, 134.8, 133.9, 132.7, 131.3, 130.8, 129.8, 129.5, 128.6, 127.7, 126.9, 119.8, 117.1, 116.3, 111.4. IR (KBr, ν, cm<sup>-1</sup>): 1577, 1514, 1458, 1413, 1375, 1150, 1031, 876, 746, 543. HRMS (APCI-TOF, *m/z*): calcd for C<sub>20</sub>H<sub>13</sub>Cl<sub>2</sub>N<sub>2</sub>O<sub>4</sub>S [M+H]<sup>+</sup> 446.9967, found 446.9953.

### 1-((4-fluorophenyl)sulfonyl)-5-nitro-2-phenyl-1H-indole (2c)

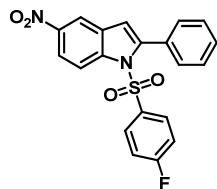

Light yellow solid, 70 mg, 88% yield; mp 149-150 °C. <sup>1</sup>H NMR (400 MHz, CDCl<sub>3</sub>; δ, ppm): 8.44 (d, *J* = 9.2 Hz, 1H), 8.40 (d, *J* = 2.4 Hz, 1H), 8.29-8.23 (m, 1H), 7.51-7.41 (m, 5H), 7.40-7.35 (m, 2H), 7.01-6.94 (m, 2H), 6.68 (s, 1H). <sup>13</sup>C NMR (100 MHz, CDCl<sub>3</sub>; δ, ppm): 165.9 (<sup>1</sup>*J*<sub>CF</sub> = 256.7 Hz), 144.9, 144.7, 141.0, 133.4 (<sup>4</sup>*J*<sub>CF</sub> = 3.2 Hz), 130.8, 130.6, 130.1, 129.8 (<sup>3</sup>*J*<sub>CF</sub> = 9.7 Hz), 129.6, 127.8, 119.9, 116.9, 116.5, 116.4 (<sup>2</sup>*J*<sub>CF</sub> = 22.8 Hz), 113.0. IR (KBr, ν, cm<sup>-1</sup>): 1590, 1519, 1491, 1445, 1382, 1346, 1233, 1186, 1156, 1087, 835, 586, 542. HRMS (APCI-TOF, *m/z*): calcd for

C<sub>20</sub>H<sub>14</sub>FN<sub>2</sub>O<sub>4</sub>S [M+H]<sup>+</sup> 397.0652, found 397.0652.

**1-((4-bromophenyl)sulfonyl)-5-nitro-2-phenyl-1H-indole (2d)**

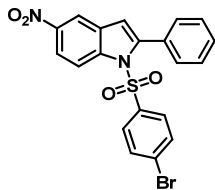

Light yellow solid, 82 mg, 90% yield; mp 157-158 °C. <sup>1</sup>H NMR (400 MHz, CDCl<sub>3</sub>; δ, ppm): 8.43 (d, *J* = 9.2 Hz, 1H), 8.40 (d, *J* = 2.4 Hz, 1H), 8.28-8.24 (m, 1H), 7.51-7.47 (m, 1H), 7.46-7.42 (m, 6H), 7.23-7.19 (m, 2H), 6.70-6.67 (m, 1H). <sup>13</sup>C NMR (100 MHz, CDCl<sub>3</sub>; δ, ppm): 144.9, 144.7, 140.9, 136.2, 132.4, 130.7, 130.6, 130.2, 129.7, 129.6, 128.3, 127.8, 120.0, 117.0, 116.5, 113.2. IR (KBr, ν, cm<sup>-1</sup>): 1588, 1554, 1437, 1420, 1361, 1314, 1259, 1145, 1107, 1044, 894, 578. HRMS (APCI-TOF, *m/z*): calcd for C<sub>20</sub>H<sub>14</sub>BrN<sub>2</sub>O<sub>4</sub>S [M+H]<sup>+</sup> 456.9852, found 456.9856.

**5-nitro-1-((3-nitrophenyl)sulfonyl)-2-phenyl-1H-indole (2e)**

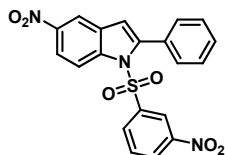

Yellow solid, 75 mg, 89% yield; mp 204-205 °C. <sup>1</sup>H NMR (400 MHz, CDCl<sub>3</sub>; δ, ppm): 8.45 (d, *J* = 9.2 Hz, 1H), 8.39 (d, *J* = 2.0 Hz, 1H), 8.37-8.32 (m, 1H), 8.31-8.26 (m, 1H), 8.14 (s, 1H), 7.73 (d, *J* = 8.0 Hz, 1H), 7.59-7.51 (m, 2H), 7.49-7.41 (m, 4H), 6.72 (s, 1H). <sup>13</sup>C NMR (100 MHz, CDCl<sub>3</sub>; δ, ppm): 147.9, 145.2, 144.6, 140.7, 139.0, 132.1, 130.6, 130.6, 130.3, 130.3, 130.0, 128.6, 128.0, 122.4, 120.3, 117.1, 116.5, 113.5. IR (KBr, ν, cm<sup>-1</sup>): 1607, 1532, 1516, 1444, 1348, 1184, 1073, 821, 764, 599. HRMS (APCI-TOF, *m/z*): calcd for C<sub>20</sub>H<sub>14</sub>N<sub>3</sub>O<sub>6</sub>S [M+H]<sup>+</sup> 424.0597, found 424.0586.

**5-nitro-2-phenyl-1-(phenylsulfonyl)-1H-indole (2f)**

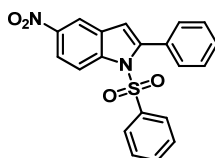

Light yellow solid, 72 mg, 95% yield; mp 165-166 °C. <sup>1</sup>H NMR (400 MHz, CDCl<sub>3</sub>; δ, ppm): 8.48 (d, *J* = 9.2 Hz, 1H), 8.41 (d, *J* = 2.4 Hz, 1H), 8.30-8.25 (m, 1H), 7.56-7.49 (m, 2H), 7.46 (t, *J* = 4.8 Hz, 4H), 7.42-7.38 (m, 2H), 7.36-7.31 (m, 2H), 6.69 (s, 1H). <sup>13</sup>C NMR (100 MHz, CDCl<sub>3</sub>; δ, ppm): 144.8, 144.7, 141.0, 137.4, 134.3, 130.9, 130.6, 130.1, 129.5, 129.0, 127.7, 126.8, 119.8, 116.8, 116.5, 112.8. IR (KBr, ν, cm<sup>-1</sup>): 3078, 1526, 1447, 1382, 1345, 1181, 1048, 764, 597. HRMS (APCI-TOF, *m/z*): calcd for C<sub>20</sub>H<sub>15</sub>N<sub>2</sub>O<sub>4</sub>S [M+H]<sup>+</sup> 379.0747, found 379.0718.

**5-nitro-2-phenyl-1-tosyl-1H-indole (2g)**

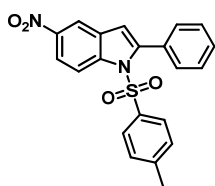

Light yellow solid, 72 mg, 92% yield; mp 165-166 °C. <sup>1</sup>H NMR (400 MHz, CDCl<sub>3</sub>; δ, ppm): 8.44 (d, *J* = 9.2 Hz, 1H), 8.38 (d, *J* = 2.4 Hz, 1H), 8.27-8.21 (m, 1H), 7.50-7.41 (m, 5H), 7.26 (t, *J* = 4.0 Hz, 3H), 7.09 (d, *J* = 8.0 Hz, 2H), 6.65 (s,

1H), 2.32 (s, 3H). <sup>13</sup>C NMR (100 MHz, CDCl<sub>3</sub>; δ, ppm): 145.5, 144.9, 144.7, 141.0, 134.5, 131.1, 130.6, 130.1, 129.6, 129.4, 127.7, 126.8, 119.7, 116.8, 116.5, 112.8, 21.6. IR (KBr, ν, cm<sup>-1</sup>): 1597, 1519, 1447, 1379, 1343, 1188, 1178, 820, 762, 588. HRMS (APCI-TOF, m/z): calcd for C<sub>21</sub>H<sub>18</sub>N<sub>2</sub>O<sub>4</sub>S [M+H]<sup>+</sup> 393.0903, found 393.0904.

**1-((4-methoxyphenyl)sulfonyl)-5-nitro-2-phenyl-1H-indole (2h)**

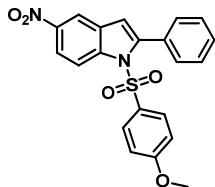

Light yellow solid, 59 mg, 72% yield; mp 173-174°C. <sup>1</sup>H NMR (400 MHz, CDCl<sub>3</sub>; δ, ppm): 8.44 (d, *J* = 9.2 Hz, 1H), 8.38 (d, *J* = 2.4 Hz, 1H), 8.27-8.21 (m, 1H), 7.50-7.41 (m, 5H), 7.34-7.28 (m, 2H), 6.78-6.71 (m, 2H), 6.65 (s, 1H), 3.78 (s, 3H). <sup>13</sup>C NMR (100 MHz, CDCl<sub>3</sub>; δ, ppm): 164.0, 144.9, 144.6, 141.0, 131.1, 130.6, 130.0, 129.4, 129.2, 129.0, 127.7, 119.7, 116.8, 116.5, 114.1, 112.6, 55.7. IR (KBr, ν, cm<sup>-1</sup>): 1594, 1515, 1496, 1448, 1377, 1342, 1265, 1162, 1062, 727, 588. HRMS (APCI-TOF, m/z): calcd for C<sub>21</sub>H<sub>18</sub>N<sub>2</sub>O<sub>5</sub>S [M+H]<sup>+</sup> 409.0852, found 409.0824.

**1-((4-isopropylphenyl)sulfonyl)-5-nitro-2-phenyl-1H-indole (2i)**

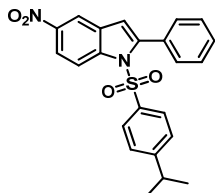

Light yellow solid, 54 mg, 64% yield; mp 103-104 °C. <sup>1</sup>H NMR (400 MHz, CDCl<sub>3</sub>; δ, ppm): 8.45 (d, *J* = 9.2 Hz, 1H), 8.39 (d, *J* = 2.4 Hz, 1H), 8.28-8.21 (m, 1H), 7.50-7.45 (m, 1H), 7.45-7.40 (m, 4H), 7.31-7.27 (m, 2H), 7.14 (d, *J* = 8.4 Hz, 2H), 6.66 (s, 1H), 2.91-2.82 (m, 1H), 1.17 (d, *J* = 6.8 Hz, 6H). <sup>13</sup>C NMR (100 MHz, CDCl<sub>3</sub>; δ, ppm): 156.1, 144.8, 144.6, 141.0, 134.9, 131.1, 130.6, 130.0, 129.4, 127.6, 127.1, 127.0, 119.7, 116.8, 116.4, 112.6, 34.2, 23.5. IR (KBr, ν, cm<sup>-1</sup>): 2962, 1595, 1517, 1446, 1383, 1344, 1179, 1055, 821, 649, 592. HRMS (APCI-TOF, m/z): calcd for C<sub>23</sub>H<sub>21</sub>N<sub>2</sub>O<sub>4</sub>S [M+H]<sup>+</sup> 421.1216, found 421.1187.

**1-((4-tert-butylphenyl)sulfonyl)-5-nitro-2-phenyl-1H-indole (2j)**

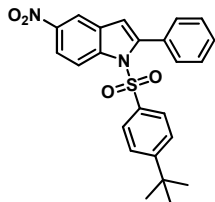

Light yellow solid, 82 mg, 95% yield; mp 109-110 °C. <sup>1</sup>H NMR (400 MHz, CDCl<sub>3</sub>; δ, ppm): 8.48 (d, *J* = 9.2 Hz, 1H), 8.42 (d, *J* = 2.4 Hz, 1H), 8.30-8.25 (m, 1H), 7.52-7.47 (m, 1H), 7.47-7.41 (m, 4H), 7.33 (s, 4H), 6.68 (s, 1H), 1.27 (s, 9H). <sup>13</sup>C NMR (100 MHz, CDCl<sub>3</sub>; δ, ppm): 158.4, 144.7, 144.6, 140.9, 134.6, 131.1, 130.6, 129.9, 129.4, 127.6, 126.8, 126.0, 119.7, 116.8, 116.4, 112.6, 35.3, 30.9. IR (KBr, ν, cm<sup>-1</sup>): 2963, 1516, 1448, 1384, 1344, 1185, 1088, 821, 729, 587. HRMS (APCI-TOF, m/z): calcd for C<sub>24</sub>H<sub>23</sub>N<sub>2</sub>O<sub>4</sub>S [M+H]<sup>+</sup> 421.1373, found 421.1349.

**1-(naphthalen-2-ylsulfonyl)-5-nitro-2-phenyl-1H-indole (2k)**

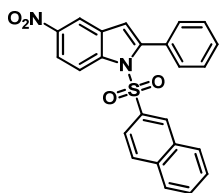

Light yellow solid, 78 mg, 91% yield; mp 166-167 °C. <sup>1</sup>H NMR (400 MHz, CDCl<sub>3</sub>; δ, ppm): 8.54 (d, *J* = 9.2 Hz, 1H), 8.36 (d, *J* = 2.4 Hz, 1H), 8.29-8.25 (m, 1H), 7.90 (s, 1H), 7.81 (d, *J* = 8.0 Hz, 1H), 7.76-7.72 (m, 2H), 7.65-7.55 (m, 2H), 7.52-7.47 (m, 1H), 7.44-7.38 (m, 4H), 7.34-7.30 (m, 1H), 6.63 (s, 1H). <sup>13</sup>C NMR (100 MHz, CDCl<sub>3</sub>; δ, ppm): 144.7, 144.7, 141.0, 135.3, 134.3, 131.5, 131.0, 130.7, 130.0, 129.7, 129.5, 129.5, 129.5, 129.2, 127.9, 127.7, 121.0, 119.8, 116.9, 116.5, 112.7. IR (KBr, ν, cm<sup>-1</sup>): 3058, 1559, 1516, 1385, 1342, 1180, 1075, 904, 752, 659. HRMS (APCI-TOF, *m/z*): calcd for C<sub>24</sub>H<sub>17</sub>N<sub>2</sub>O<sub>4</sub>S [M+H]<sup>+</sup> 429.0903, found 429.0877.

**1-(benzylsulfonyl)-5-nitro-2-phenyl-1H-indole (2l)**

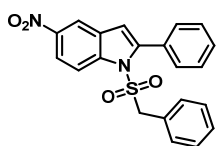

Light yellow solid, 64 mg, 81% yield; mp 168-169 °C. <sup>1</sup>H NMR (400 MHz, CDCl<sub>3</sub>; δ, ppm): 8.44 (d, *J* = 2.4 Hz, 1H), 8.12-8.06 (m, 1H), 7.96 (d, *J* = 9.2 Hz, 1H), 7.48-7.43 (m, 1H), 7.41-7.35 (m, 2H), 7.28 (s, 1H), 7.26-7.23 (m, 2H), 7.11 (t, *J* = 7.6 Hz, 2H), 6.77 (d, *J* = 7.2 Hz, 2H), 6.64 (s, 1H), 4.31 (s, 2H). <sup>13</sup>C NMR (100 MHz, CDCl<sub>3</sub>; δ, ppm): 145.1, 144.4, 140.9, 130.6, 130.5, 130.4, 129.6, 129.4, 128.9, 128.8, 127.5, 125.9, 119.5, 116.8, 115.3, 111.4, 60.6. IR (KBr, ν, cm<sup>-1</sup>): 1514, 1446, 1375, 1346, 1259, 1159, 1079, 694, 611, 534. HRMS (APCI-TOF, *m/z*): calcd for C<sub>21</sub>H<sub>17</sub>N<sub>2</sub>O<sub>4</sub>S [M+H]<sup>+</sup> 393.0903, found 393.0906.

**1-ethyl-5-nitro-2-phenyl-1H-indole (2m)**

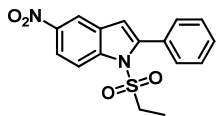

Light yellow solid, 26 mg, 40% yield; mp 188-189 °C. <sup>1</sup>H NMR (400 MHz, *d*<sub>6</sub>-DMSO; δ, ppm): 12.78 (s, 1H), 8.20-8.11 (m, 1H), 7.69 (d, *J* = 8.0 Hz, 2H), 7.57-7.50 (m, 1H), 7.46-7.32 (m, 4H), 2.77-2.67 (m, 2H), 1.25 (t, *J* = 7.6 Hz, 3H). <sup>13</sup>C NMR (100 MHz, *d*<sub>6</sub>-DMSO; δ, ppm): 146.6, 142.4, 134.0, 130.4, 128.1, 127.5, 124.8, 124.7, 124.2, 122.1, 120.5, 113.2, 28.6, 15.9. IR (KBr, ν, cm<sup>-1</sup>): 3251, 1609, 1497, 1426, 1329, 1296, 1208, 1112, 1047, 845, 735, 643. HRMS (APCI-TOF, *m/z*): calcd for C<sub>16</sub>H<sub>15</sub>N<sub>2</sub>O<sub>4</sub>S [M+H]<sup>+</sup> 331.0747, found 331.0752.

**1-cyclopropyl-5-nitro-2-phenyl-1H-indole (2n)**

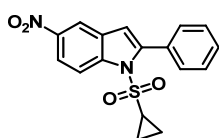

Light yellow solid, 14 mg, 21% yield; mp 194-195 °C; <sup>1</sup>H NMR (400 MHz, CDCl<sub>3</sub>; δ, ppm): 8.51 (d, *J* = 2.0 Hz, 1H), 8.32-8.21 (m, 2H), 7.61-7.54 (m, 2H), 7.51-7.42 (m, 3H), 6.80 (s, 1H), 2.37-2.29 (m, 1H), 1.13-1.04 (m, 2H), 0.91-0.82 (m, 2H); <sup>13</sup>C NMR (100 MHz, CDCl<sub>3</sub>; δ, ppm): 144.8, 144.7, 141.0, 131.1, 130.5, 129.8, 129.5, 127.8, 119.7, 116.9, 115.9, 112.2, 31.6, 5.9; IR (KBr, ν, cm<sup>-1</sup>): 3102, 1516, 1444, 1370, 1342, 1260, 1160, 1076, 1005, 816, 717, 593; HRMS (APCI-TOF, *m/z*): calcd for C<sub>17</sub>H<sub>15</sub>N<sub>2</sub>O<sub>4</sub>S [M+H]<sup>+</sup> 343.0747, found 343.0740.



**2-(4-fluorophenyl)-5-nitro-1-(phenylsulfonyl)-1H-indole (2o)**

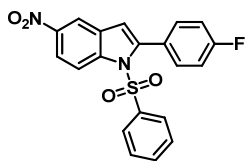

Light yellow solid, 65 mg, 82% yield; mp 168-169 °C. <sup>1</sup>H NMR (400 MHz, CDCl<sub>3</sub>; δ, ppm): 8.45 (d, *J* = 9.2 Hz, 1H), 8.39 (d, *J* = 2.4 Hz, 1H), 8.29-8.24 (m, 1H), 7.54-7.50 (m, 1H), 7.42-7.30 (m, 6H), 7.15-7.09 (m, 2H), 6.65 (s, 1H). <sup>13</sup>C NMR (100 MHz, CDCl<sub>3</sub>; δ, ppm): 163.5 (<sup>1</sup>*J*<sub>CF</sub> = 248.6 Hz), 144.79, 143.60, 140.96, 137.45, 134.37, 132.5 (<sup>3</sup>*J*<sub>CF</sub> = 8.4 Hz), 129.90, 129.09, 126.9 (<sup>4</sup>*J*<sub>CF</sub> = 3.5 Hz), 126.72, 119.95, 116.86, 116.48, 114.9 (<sup>2</sup>*J*<sub>CF</sub> = 21.8 Hz), 112.90. IR (KBr, ν, cm<sup>-1</sup>): 1609, 1516, 1443, 1379, 1343, 1227, 1188, 1074, 845, 728, 585. HRMS (APCI-TOF, *m/z*): calcd for C<sub>20</sub>H<sub>14</sub>FN<sub>2</sub>O<sub>4</sub>S [M+H]<sup>+</sup> 397.0652, found 397.0632.

**2-(4-chlorophenyl)-5-nitro-1-(phenylsulfonyl)-1H-indole (2p)**

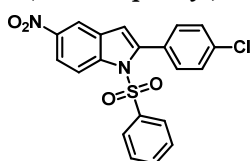

Light yellow solid, 74 mg, 90% yield; mp 173-174 °C. <sup>1</sup>H NMR (400 MHz, CDCl<sub>3</sub>; δ, ppm): 8.44 (d, *J* = 9.2 Hz, 1H), 8.37 (d, *J* = 2.4 Hz, 1H), 8.28-8.22 (m, 1H), 7.55-7.49 (m, 1H), 7.43-7.30 (m, 8H), 6.67 (s, 1H). <sup>13</sup>C NMR (100 MHz, CDCl<sub>3</sub>; δ, ppm): 144.8, 143.5, 141.0, 137.3, 135.7, 134.4, 131.8, 130.0, 129.4, 129.1, 128.0, 126.7, 120.0, 116.9, 116.5, 113.2. IR (KBr, ν, cm<sup>-1</sup>): 3122, 1516, 1484, 1442, 1379, 1341, 1225, 1189, 1091, 1063, 996, 814, 724, 600. HRMS (APCI-TOF, *m/z*): calcd for C<sub>20</sub>H<sub>14</sub>ClN<sub>2</sub>O<sub>4</sub>S [M+H]<sup>+</sup> 413.0357, found 413.0361.

**2-(3-chlorophenyl)-5-nitro-1-(phenylsulfonyl)-1H-indole (2q)**

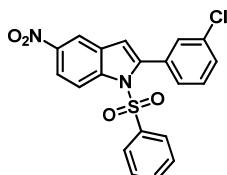

Light yellow solid, 72 mg, 87% yield; mp 170-171 °C. <sup>1</sup>H NMR (400 MHz, CDCl<sub>3</sub>; δ, ppm): 8.45 (d, *J* = 9.2 Hz, 1H), 8.39 (d, *J* = 2.0 Hz, 1H), 8.29-8.24 (m, 1H), 7.54 (t, *J* = 7.2 Hz, 1H), 7.49-7.42 (m, 1H), 7.41-7.31 (m, 7H), 6.69 (s, 1H). <sup>13</sup>C NMR (100 MHz, CDCl<sub>3</sub>; δ, ppm): 144.8, 143.0, 141.0, 137.4, 134.5, 133.6, 132.6, 130.3, 129.8, 129.5, 129.2, 129.0, 128.9, 126.8, 120.2, 117.1, 116.5, 113.3. IR (KBr, ν, cm<sup>-1</sup>): 3112, 1569, 1443, 1415, 1357, 1228, 1201, 1173, 1058, 889, 761, 597. HRMS (APCI-TOF, *m/z*): calcd for C<sub>20</sub>H<sub>14</sub>ClN<sub>2</sub>O<sub>4</sub>S [M+H]<sup>+</sup> 413.0357, found 413.0345.

**2-(2-chlorophenyl)-5-nitro-1-(phenylsulfonyl)-1H-indole (2r)**

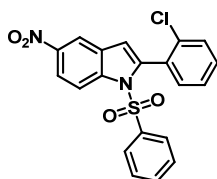

Light yellow solid, 67 mg, 81% yield; mp 168-169 °C. <sup>1</sup>H NMR (400 MHz, CDCl<sub>3</sub>; δ, ppm): 8.45 (d, *J* = 2.0 Hz, 1H), 8.42 (d, *J* = 9.4 Hz, 1H), 8.30-8.24 (m, 1H), 7.57-7.52 (m, 3H), 7.48-7.42 (m, 2H), 7.41-7.35 (m, 4H), 6.75 (s, 1H). <sup>13</sup>C NMR (100 MHz, CDCl<sub>3</sub>; δ, ppm): 144.5, 140.2, 140.0, 137.8, 135.4, 134.5, 132.9, 131.0, 130.2, 129.5, 129.4, 129.2,

127.0, 126.08, 120.0, 117.3, 115.6, 113.3. IR (KBr,  $\nu$ ,  $\text{cm}^{-1}$ ): 1556, 1473, 1428, 1365, 1219, 1182, 1097, 1023, 865, 732, 588. HRMS (APCI-TOF,  $m/z$ ): calcd for  $\text{C}_{20}\text{H}_{14}\text{ClN}_2\text{O}_4\text{S}$   $[\text{M}+\text{H}]^+$  413.0357, found 413.0368.

**2-(4-bromophenyl)-5-nitro-1-(phenylsulfonyl)-1H-indole (2s)**

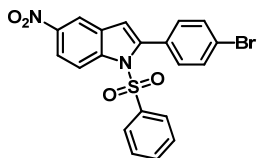

Light yellow solid, 72 mg, 79% yield; mp 179-180 °C.  $^1\text{H}$  NMR (400 MHz,  $\text{CDCl}_3$ ;  $\delta$ , ppm): 8.44 (d,  $J = 9.2$  Hz, 1H), 8.38 (d,  $J = 2.4$  Hz, 1H), 8.28-8.22 (m, 1H), 7.60-7.55 (m, 2H), 7.54-7.50 (m, 1H), 7.40-7.29 (m, 6H), 6.67 (s, 1H).  $^{13}\text{C}$  NMR (100 MHz,  $\text{CDCl}_3$ ;  $\delta$ , ppm): 144.9, 143.5, 141.1, 137.3, 134.4, 132.0, 131.0, 123.0, 129.9, 129.1, 126.7, 124.0, 120.1, 116.9, 116.5, 113.2. IR (KBr,  $\nu$ ,  $\text{cm}^{-1}$ ): 1589, 1472, 1428, 1369, 1258, 1185, 1164, 1021, 862, 759, 580. HRMS (APCI-TOF,  $m/z$ ): calcd for  $\text{C}_{20}\text{H}_{14}\text{BrN}_2\text{O}_4\text{S}$   $[\text{M}+\text{H}]^+$  456.9852, found 456.9850.

**methyl 4-(5-nitro-1-(phenylsulfonyl)-1H-indol-2-yl)benzoate (2t)**

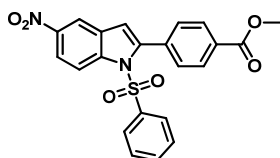

Light yellow solid, 64 mg, 73% yield; mp 191-192 °C.  $^1\text{H}$  NMR (400 MHz,  $\text{CDCl}_3$ ;  $\delta$ , ppm): 8.45 (d,  $J = 9.2$  Hz, 1H), 8.39 (d,  $J = 2.4$  Hz, 1H), 8.30-8.24 (m, 1H), 8.11 (d,  $J = 8.4$  Hz, 2H), 7.57-7.49 (m, 3H), 7.39-7.29 (m, 4H), 6.73 (s, 1H), 3.98 (s, 3H).  $^{13}\text{C}$  NMR (100 MHz,  $\text{CDCl}_3$ ;  $\delta$ , ppm): 166.6, 144.9, 143.7, 141.2, 137.2, 135.4, 134.5, 130.8, 130.5, 130.0, 129.1, 128.9, 126.7, 120.2, 117.1, 116.6, 113.8, 52.4. IR (KBr,  $\nu$ ,  $\text{cm}^{-1}$ ): 1734, 1523, 1497, 1425, 1315, 1371, 1160, 1036, 864, 783, 583. HRMS (APCI-TOF,  $m/z$ ): calcd for  $\text{C}_{22}\text{H}_{17}\text{N}_2\text{O}_6\text{S}$   $[\text{M}+\text{H}]^+$  437.0801, found 437.0809.

**5-nitro-1-(phenylsulfonyl)-2-(p-tolyl)-1H-indole (2u)**

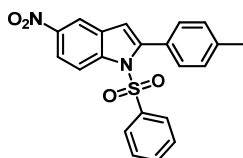

Light yellow solid, 55 mg, 70% yield; mp 200-201 °C.  $^1\text{H}$  NMR (400 MHz,  $\text{CDCl}_3$ ;  $\delta$ , ppm): 8.46 (d,  $J = 9.2$  Hz, 1H), 8.38 (d,  $J = 2.4$  Hz, 1H), 8.28-8.23 (m, 1H), 7.55-7.50 (m, 1H), 7.43-7.40 (m, 2H), 7.37-7.31 (m, 4H), 7.27 (d,  $J = 8.0$  Hz, 2H), 6.65 (s, 1H), 2.48 (s, 3H).  $^{13}\text{C}$  NMR (100 MHz,  $\text{CDCl}_3$ ;  $\delta$ , ppm): 145.1, 144.7, 141.0, 139.6, 137.4, 134.2, 130.5, 130.2, 129.0, 128.5, 128.1, 126.8, 119.7, 116.7, 116.5, 112.6, 21.5. IR (KBr,  $\nu$ ,  $\text{cm}^{-1}$ ): 2963, 1516, 1448, 1378, 1343, 1185, 1069, 901, 684, 565. HRMS (APCI-TOF,  $m/z$ ): calcd for  $\text{C}_{21}\text{H}_{17}\text{N}_2\text{O}_4\text{S}$   $[\text{M}+\text{H}]^+$  393.0903, found 393.0892.

**2-(4-methoxyphenyl)-5-nitro-1-(phenylsulfonyl)-1H-indole (2v)**

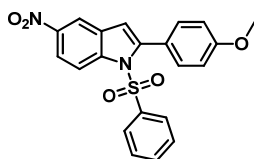

Light yellow solid, 60 mg, 73% yield; mp 180-181 °C.  $^1\text{H}$  NMR (400 MHz,  $\text{CDCl}_3$ ;  $\delta$ , ppm): 8.44 (d,  $J = 9.2$  Hz, 1H), 8.35 (s, 1H), 8.22 (d,  $J = 9.2$  Hz, 1H), 7.50 (t,  $J = 7.2$  Hz, 1H), 7.41-7.27 (m, 6H), 6.95 (d,  $J = 8.4$  Hz, 2H), 6.60 (s, 1H), 3.89 (s, 3H).  $^{13}\text{C}$  NMR (100 MHz,  $\text{CDCl}_3$ ;  $\delta$ , ppm): 160.6, 144.8, 144.7, 141.0, 137.5, 134.2, 132.0, 130.2, 129.0, 126.8,

123.1, 119.6, 116.6, 116.5, 113.2, 112.2, 55.4. IR (KBr,  $\nu$ ,  $\text{cm}^{-1}$ ): 3120, 1613, 1518, 1441, 1413, 1342, 1253, 1188, 1072, 885, 815, 727, 588. HRMS (APCI-TOF,  $m/z$ ): calcd for  $\text{C}_{21}\text{H}_{17}\text{N}_2\text{O}_5\text{S}$   $[\text{M}+\text{H}]^+$  409.0852, found 409.0873.

**2-(4-(tert-butyl)phenyl)-5-nitro-1-(phenylsulfonyl)-1H-indole (2w)**

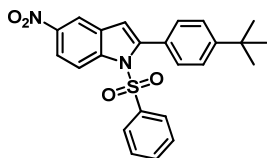

Light yellow solid, 71 mg, 82% yield; mp 212-213 °C.  $^1\text{H}$  NMR (400 MHz,  $\text{CDCl}_3$ ;  $\delta$ , ppm): 8.44 (d,  $J = 9.2$  Hz, 1H), 8.37 (d,  $J = 2.4$  Hz, 1H), 8.26-8.21 (m, 1H), 7.52-7.47 (m, 1H), 7.45-7.42 (m, 2H), 7.39-7.33 (m, 4H), 7.32-7.27 (m, 2H), 6.63 (s, 1H), 1.40 (s, 9H).  $^{13}\text{C}$  NMR (100 MHz,  $\text{CDCl}_3$ ;  $\delta$ , ppm): 152.7, 145.0, 144.7, 141.0, 137.5, 134.2, 130.3, 130.1, 128.9, 127.9, 126.9, 124.7, 119.6, 116.7, 116.5, 112.5, 34.9, 31.3. IR (KBr,  $\nu$ ,  $\text{cm}^{-1}$ ): 2963, 1516, 1384, 1344, 1185, 1088, 913, 821, 729, 581. HRMS (APCI-TOF,  $m/z$ ): calcd for  $\text{C}_{24}\text{H}_{23}\text{N}_2\text{O}_4\text{S}$   $[\text{M}+\text{H}]^+$  435.1373, found 435.1343.

**2-(naphthalen-2-yl)-5-nitro-1-(phenylsulfonyl)-1H-indole (2x)**

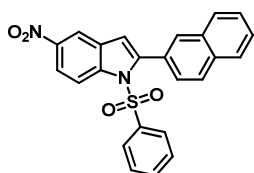

Light yellow solid, 66 mg, 77% yield; mp 126-127 °C.  $^1\text{H}$  NMR (400 MHz,  $\text{CDCl}_3$ ;  $\delta$ , ppm): 8.48 (d,  $J = 9.2$  Hz, 1H), 8.39 (d,  $J = 2.4$  Hz, 1H), 8.30-8.24 (m, 1H), 7.94-7.83 (m, 4H), 7.64-7.55 (m, 3H), 7.52-7.47 (m, 1H), 7.40-7.35 (m, 2H), 7.31-7.26 (m, 2H), 6.75 (s, 1H).  $^{13}\text{C}$  NMR (100 MHz,  $\text{CDCl}_3$ ;  $\delta$ , ppm): 144.9, 144.8, 141.1, 137.4, 134.3, 133.5, 132.4, 130.2, 129.6, 129.0, 128.6, 128.3, 128.2, 127.9, 127.2, 127.1, 126.8, 126.7, 119.9, 116.9, 116.5, 113.3. IR (KBr,  $\nu$ ,  $\text{cm}^{-1}$ ): 1516, 1447, 1383, 1343, 1175, 1089, 1055, 901, 822, 729, 605. HRMS (APCI-TOF,  $m/z$ ): calcd for  $\text{C}_{24}\text{H}_{17}\text{N}_2\text{O}_4\text{S}$   $[\text{M}+\text{H}]^+$  429.0903, found 429.0875.

**5-nitro-2-(thiophen-2-yl)-1H-indole (2y)**

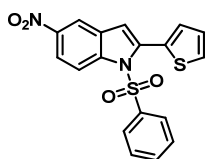

Brown solid, 46 mg, 60% yield; mp 125-127 °C.  $^1\text{H}$  NMR (400 MHz,  $\text{CDCl}_3$ ;  $\delta$ , ppm): 8.45 (d,  $J = 9.2$  Hz, 1H), 8.38 (d,  $J = 2.2$  Hz, 1H), 8.26-8.22 (m, 1H), 7.53-7.49 (m, 1H), 7.40-7.36 (m, 3H), 7.34-7.30 (m, 3H), 7.23 (d,  $J = 4.9$  Hz, 1H), 6.68 (s, 1H).  $^{13}\text{C}$  NMR (100 MHz,  $\text{CDCl}_3$ ;  $\delta$ , ppm): 144.6, 140.8, 139.3, 137.6, 134.3, 130.9, 130.2, 129.7, 129.0, 127.2, 126.8, 124.8, 119.8, 116.7, 116.2, 112.5. IR (KBr,  $\nu$ ,  $\text{cm}^{-1}$ ): 3125, 1502, 1445, 1360, 1336, 1233, 1188, 1025, 1011, 824, 721, 587. HRMS (APCI-TOF,  $m/z$ ): calcd for  $\text{C}_{18}\text{H}_{13}\text{N}_2\text{O}_4\text{S}_2$   $[\text{M}+\text{H}]^+$  385.0311, found 385.0309.

**2-butyl-5-nitro-1-(phenylsulfonyl)-1H-indole (2z)**

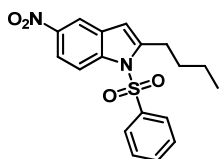

Yellow oil, 52 mg, 73% yield.  $^1\text{H}$  NMR (400 MHz,  $\text{CDCl}_3$ ;  $\delta$ , ppm): 8.36-8.25 (m, 2H), 8.17-8.12 (m, 1H), 7.75 (t,  $J =$

7.2 Hz, 2H), 7.59 (t,  $J = 7.6$  Hz, 1H), 7.47 (t,  $J = 7.6$  Hz, 2H), 6.52 (s, 1H), 3.00 (t,  $J = 7.6$  Hz, 2H), 1.78-1.69 (m, 2H), 1.49-1.42 (m, 2H), 0.96 (t,  $J = 7.2$  Hz, 3H).  $^{13}\text{C}$  NMR (100 MHz,  $\text{CDCl}_3$ ;  $\delta$ , ppm): 145.9, 144.3, 140.1, 138.6, 134.3, 129.7, 129.6, 126.3, 119.0, 116.2, 114.7, 108.5, 30.6, 28.6, 22.4, 13.9. IR (KBr,  $\nu$ ,  $\text{cm}^{-1}$ ): 2982, 1558, 1523, 1486, 1379, 1248, 1190, 1065, 1012, 871, 763, 620. HRMS (APCI-TOF,  $m/z$ ): calcd for  $\text{C}_{18}\text{H}_{19}\text{N}_2\text{O}_4\text{S}$   $[\text{M}+\text{H}]^+$  359.1060, found 359.1035.

**2-([1,1'-biphenyl]-2-yl)-5-nitro-1H-indole (2aa)**

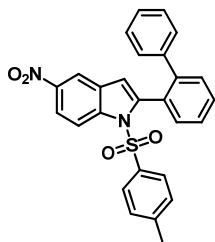

Light yellow solid, 90 mg, 96% yield; mp 163-164 °C.  $^1\text{H}$  NMR (400 MHz,  $\text{CDCl}_3$ ;  $\delta$ , ppm): 7.60-7.51 (m, 6H), 7.49-7.43 (m, 5H), 7.40-7.35 (m, 1H), 7.25-7.18 (m, 2H), 7.07 (d,  $J = 8.0$  Hz, 2H), 7.03-6.99 (m, 1H), 6.77 (s, 1H), 2.29 (s, 3H).  $^{13}\text{C}$  NMR (100 MHz,  $\text{CDCl}_3$ ;  $\delta$ , ppm): 145.5, 144.4, 143.6, 143.5, 140.7, 139.8, 135.3, 130.9, 130.1, 129.9, 129.9, 129.7, 129.5, 129.1, 127.9, 127.1, 126.9, 126.4, 119.5, 116.9, 115.5, 113.2, 21.6. IR (KBr,  $\nu$ ,  $\text{cm}^{-1}$ ): 1594, 1519, 1447, 1377, 1345, 1179, 1076, 897, 815, 705, 670, 587. HRMS (APCI-TOF,  $m/z$ ): calcd for  $\text{C}_{27}\text{H}_{21}\text{N}_2\text{O}_4\text{S}$   $[\text{M}+\text{H}]^+$  469.1216, found 469.1211.

**5-chloro-7-nitro-2-phenyl-1-(phenylsulfonyl)-1H-indole (2ab)**

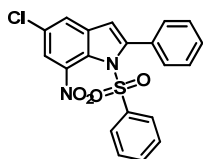

Yellow solid, 54 mg, 65% yield; mp 163-164 °C.  $^1\text{H}$  NMR (400 MHz,  $\text{CDCl}_3$ ;  $\delta$ , ppm): 7.88 (d,  $J = 2.0$  Hz, 1H), 7.71 (d,  $J = 2.0$  Hz, 1H), 7.47-7.43 (m, 1H), 7.41-7.37 (m, 1H), 7.32-7.25 (m, 5H), 7.18-7.13 (m, 2H), 6.94-6.88 (m, 2H), 6.51 (s, 1H).  $^{13}\text{C}$  NMR (100 MHz,  $\text{CDCl}_3$ ;  $\delta$ , ppm): 148.2, 141.4, 137.1, 135.6, 134.2, 130.4, 130.0, 129.8, 129.7, 129.7, 128.5, 128.2, 127.3, 125.3, 120.9, 111.1. IR (KBr,  $\nu$ ,  $\text{cm}^{-1}$ ): 3077, 1540, 1449, 1376, 1236, 1169, 1086, 998, 839, 753, 686, 594. HRMS (APCI-TOF,  $m/z$ ): calcd for  $\text{C}_{20}\text{H}_{14}\text{ClN}_2\text{O}_4\text{S}$   $[\text{M}+\text{H}]^+$  413.0357, found 413.0364.

**5-bromo-7-nitro-2-phenyl-1-(phenylsulfonyl)-1H-indole (2ac)**

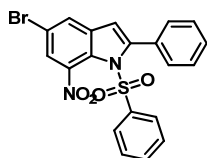

Yellow solid, 80 mg, 88% yield; mp 176-177 °C.  $^1\text{H}$  NMR (400 MHz,  $\text{CDCl}_3$ ;  $\delta$ , ppm): 8.00 (d,  $J = 1.6$  Hz, 1H), 7.85 (d,  $J = 1.6$  Hz, 1H), 7.45 (t,  $J = 7.6$  Hz, 1H), 7.40-7.36 (m, 1H), 7.31-7.24 (m, 4H), 7.15 (t,  $J = 8.0$  Hz, 2H), 6.94-6.85 (m, 2H), 6.50 (s, 1H).  $^{13}\text{C}$  NMR (100 MHz,  $\text{CDCl}_3$ ;  $\delta$ , ppm): 148.1, 141.5, 137.1, 136.0, 134.2, 130.2, 129.9, 129.7, 129.7, 128.6, 128.4, 128.2, 127.3, 123.4, 117.4, 110.9. IR (KBr,  $\nu$ ,  $\text{cm}^{-1}$ ): 3075, 1459, 1448, 1366, 1238, 1169, 1087, 997, 831, 751, 686, 594. HRMS (APCI-TOF,  $m/z$ ): calcd for  $\text{C}_{20}\text{H}_{14}\text{BrN}_2\text{O}_4\text{S}$   $[\text{M}+\text{H}]^+$  458.9833, found 458.9844.

**5-fluoro-7-nitro-1-(phenylsulfonyl)-2-(p-tolyl)-1H-indole (2ad)**

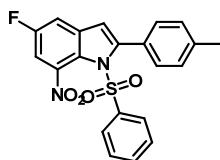

Yellow solid, 66 mg, 81% yield; mp 188-189 °C. <sup>1</sup>H NMR (400 MHz, CDCl<sub>3</sub>; δ, ppm): 7.66-7.62 (m, 1H), 7.45 (t, *J* = 7.6 Hz, 1H), 7.40-7.37 (m, 1H), 7.21-7.12 (m, 6H), 6.93 (d, *J* = 8.0 Hz, 2H), 6.48 (s, 1H), 2.41 (s, 3H). <sup>13</sup>C NMR (100 MHz, CDCl<sub>3</sub>; δ, ppm): 159.1 (<sup>1</sup>*J*<sub>CF</sub> = 245.6 Hz), 148.90, 141.4 (<sup>1</sup>*J*<sub>CF</sub> = 9.6 Hz), 140.06, 136.86, 135.8 (<sup>4</sup>*J*<sub>CF</sub> = 9.7 Hz), 134.03, 129.60, 128.83, 128.39, 127.8 (<sup>7</sup>*J*<sub>CF</sub> = 2.1 Hz), 127.3 (<sup>6</sup>*J*<sub>CF</sub> = 2.3 Hz), 111.6 (<sup>3</sup>*J*<sub>CF</sub> = 23.6 Hz), 111.4 (<sup>5</sup>*J*<sub>CF</sub> = 3.8 Hz), 109.0 (<sup>2</sup>*J*<sub>CF</sub> = 29.4 Hz), 21.45. IR (KBr, ν, cm<sup>-1</sup>): 3069, 1462, 1447, 1364, 1257, 1168, 1088, 980, 854, 750, 688. HRMS (APCI-TOF, *m/z*): calcd for C<sub>21</sub>H<sub>16</sub>FN<sub>2</sub>O<sub>4</sub>S [M+H]<sup>+</sup> 411.0809, found 411.0815.

#### 5-chloro-7-nitro-1-(phenylsulfonyl)-2-(p-tolyl)-1H-indole (2ae)

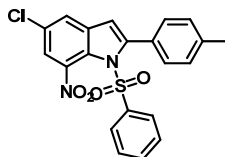

Yellow solid, 67 mg, 79% yield; mp 178-179 °C. <sup>1</sup>H NMR (400 MHz, CDCl<sub>3</sub>; δ, ppm): 7.87 (d, *J* = 1.6 Hz, 1H), 7.67 (d, *J* = 1.6 Hz, 1H), 7.44 (d, *J* = 7.6 Hz, 1H), 7.26 (s, 1H), 7.20-7.14 (m, 4H), 7.13 (d, *J* = 8.0 Hz, 2H), 6.93 (d, *J* = 7.6 Hz, 2H), 6.45 (s, 1H), 2.40 (s, 3H). <sup>13</sup>C NMR (100 MHz, CDCl<sub>3</sub>; δ, ppm): 148.5, 141.5, 140.1, 137.1, 135.8, 134.1, 130.5, 129.7, 129.6, 128.8, 128.4, 127.3, 127.2, 125.0, 120.7, 110.7, 21.5. IR (KBr, ν, cm<sup>-1</sup>): 1732, 1551, 1446, 1375, 1244, 1175, 1042, 966, 818, 752, 582. HRMS (APCI-TOF, *m/z*): calcd for C<sub>21</sub>H<sub>16</sub>ClN<sub>2</sub>O<sub>4</sub>S [M+H]<sup>+</sup> 427.0513, found 427.0510.

#### 5-methyl-7-nitro-1-(phenylsulfonyl)-2-(p-tolyl)-1H-indole (2af)

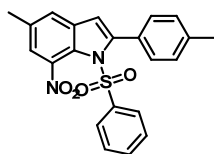

Yellow solid, 53 mg, 65% yield; mp 191-192 °C. <sup>1</sup>H NMR (400 MHz, CDCl<sub>3</sub>; δ, ppm): 7.70 (s, 1H), 7.47 (s, 1H), 7.43 (s, 1H), 7.36 (d, *J* = 6.4 Hz, 1H), 7.21 (d, *J* = 8.0 Hz, 2H), 7.17-7.09 (m, 4H), 6.95 (d, *J* = 7.6 Hz, 2H), 6.43 (s, 1H), 2.52 (s, 3H), 2.40 (s, 3H). <sup>13</sup>C NMR (100 MHz, CDCl<sub>3</sub>; δ, ppm): 147.2, 139.5, 137.1, 135.5, 135.1, 133.7, 129.6, 128.7, 128.2, 127.8, 127.3, 127.2, 125.7, 121.7, 111.7, 21.4, 21.1. IR (KBr, ν, cm<sup>-1</sup>): 1651, 1539, 1506, 1448, 1371, 1213, 1174, 1088, 820, 753, 728, 580. HRMS (APCI-TOF, *m/z*): calcd for C<sub>22</sub>H<sub>19</sub>N<sub>2</sub>O<sub>4</sub>S [M+H]<sup>+</sup> 407.1060, found 407.1049.

### General Procedure for the Synthesis of Products 3

Example for the synthesis of **3a**

Under Ar conditions, AgNO<sub>3</sub> (0.02 mmol, 0.1 equiv.), 2-((4-bromophenyl)ethynyl)-N-methylaniline **2a** (0.2 mmol, 1.0 equiv.) in 3.0 mL of 1,4-Dioxane were added into 10-mL reaction tube. Then, *t*-BuONO (0.4 mmol, 2.0 equiv.) was added into the reaction system. The mixture was stirred for 4 hours at 60 °C. After completion of the reaction (TLC monitored), the reaction system was evaporated under vacuum and purified by flash column chromatography (silica gel, mixtures of petroleum ether / ethyl acetate = 1: 5, v/v) to afford the desired product **3a**.

#### 3-(4-bromobenzoyl)-1-methyl-1H-indazole 2-oxide (3a)

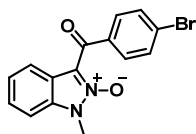

Yellow solid, 51 mg, 78% yield; mp 156-158 °C. <sup>1</sup>H NMR (400 MHz, CDCl<sub>3</sub>; δ, ppm): 7.93 (d, *J* = 8.1 Hz, 1H), 7.76 (d, *J* = 8.4 Hz, 2H), 7.63 (d, *J* = 8.4 Hz, 2H), 7.51-7.45 (m, 1H), 7.37-7.31 (m, 1H), 7.24 (d, *J* = 8.3 Hz, 1H), 3.90 (s, 3H). <sup>13</sup>C NMR (100 MHz, CDCl<sub>3</sub>; δ, ppm): 184.8, 135.9, 131.6, 131.0, 130.8, 128.0, 126.9, 124.4, 121.5, 120.5, 118.7, 107.3, 29.2. IR (KBr, ν, cm<sup>-1</sup>): 3063, 1633, 1616, 1587, 1508, 1448, 1358, 1305, 1009, 885, 748. HRMS (APCI-TOF, *m/z*): calcd for C<sub>15</sub>H<sub>12</sub>BrN<sub>2</sub>O<sub>2</sub> [M+H]<sup>+</sup> 331.0076, found 331.0071.

### 3-(4-fluorobenzoyl)-1-methyl-1H-indazole 2-oxide (3b)

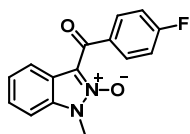

Yellow solid, 39 mg, 73% yield; mp 128-130 °C. <sup>1</sup>H NMR (400 MHz, CDCl<sub>3</sub>; δ, ppm): 7.95 (d, *J* = 5.5 Hz, 1H), 7.94-7.90 (m, 2H), 7.51-7.45 (m, 1H), 7.36-7.31 (m, 1H), 7.24 (d, *J* = 8.3 Hz, 1 H), 7.20-7.14 (m, *J* = 8.6 Hz, 2H), 3.91 (s, 3H). <sup>13</sup>C NMR (100 MHz, CDCl<sub>3</sub>; δ, ppm): 184.3, 165.7 (<sup>3</sup>*J*<sub>CF</sub> = 252.9 Hz), 133.3, 132.1 (<sup>1</sup>*J*<sub>CF</sub> = 9.3 Hz), 131.0, 126.9, 124.3, 121.6, 120.5, 118.8, 115.5 (<sup>2</sup>*J*<sub>CF</sub> = 22.0 Hz), 107.2, 29.2. IR (KBr, ν, cm<sup>-1</sup>): 3085, 1633, 1600, 1501, 1436, 1359, 1306, 1236, 1158, 889, 739, 593. HRMS (APCI-TOF, *m/z*): calcd for C<sub>15</sub>H<sub>12</sub>FN<sub>2</sub>O<sub>2</sub> [M+H]<sup>+</sup> 271.0877, found 271.0878.

### 3-benzoyl-1-methyl-1H-indazole 2-oxide (3c)

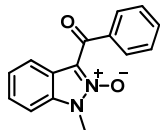

Yellow oil, 20 mg, 40% yield. <sup>1</sup>H NMR (400 MHz, CDCl<sub>3</sub>; δ, ppm): 7.93-7.83 (m, 3H), 7.63-7.58 (m, 1H), 7.52-7.44 (m, 2H), 7.34- 7.29 (m, 1H), 7.23 (d, *J* = 8.3 Hz, 1H), 3.90 (s, 3H). <sup>13</sup>C NMR (100 MHz, CDCl<sub>3</sub>; δ, ppm): 185.9, 137.2, 133.0, 130.9, 129.2, 128.3, 126.7, 124.1, 120.5, 118.8, 107.2, 29.1. IR (KBr, ν, cm<sup>-1</sup>): 3060, 1635, 1508, 1449, 1355, 1306, 1203, 1099, 1041, 880, 700, 648. HRMS (APCI-TOF, *m/z*): calcd for C<sub>15</sub>H<sub>13</sub>N<sub>2</sub>O<sub>2</sub> [M+H]<sup>+</sup> 253.0971, found 253.0978.

### 1-methyl-3-(4-methylbenzoyl)-1H-indazole 2-oxide (3d)

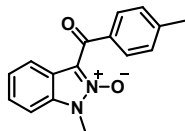

Light yellow solid, 18 mg, 34% yield; mp 150-152 °C. <sup>1</sup>H NMR (400 MHz, CDCl<sub>3</sub>; δ, ppm): 7.85 (d, *J* = 8.1 Hz, 3H), 7.81 (d, *J* = 8.1 Hz, 1H), 7.48-7.42 (m, 1H), 7.33-7.27 (m, 3H), 7.22 (d, *J* = 8.3 Hz, 1H), 3.90 (s, 3H), 2.44 (s, 3H). <sup>13</sup>C NMR (100 MHz, CDCl<sub>3</sub>; δ, ppm): 185.5, 144.0, 134.5, 131.0, 129.5, 129.0, 126.7, 124.0, 121.8, 120.5, 118.8, 107.1, 29.1, 21.9. IR (KBr, ν, cm<sup>-1</sup>): 2962, 1630, 1635, 1516, 1428, 1360, 1303, 1259, 1177, 1098, 886, 738. HRMS (APCI-TOF, *m/z*): calcd for C<sub>16</sub>H<sub>15</sub>N<sub>2</sub>O<sub>2</sub> [M+H]<sup>+</sup> 267.1128, found 267.1131.

### 3-(4-methoxybenzoyl)-1-methyl-1H-indazole 2-oxide (3e)

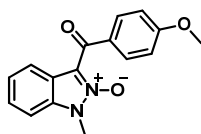

Yellow solid, 45 mg, 80% yield; mp 132-134 °C. <sup>1</sup>H NMR (400 MHz, CDCl<sub>3</sub>; δ, ppm): 7.93 (d, *J* = 8.7 Hz, 2H), 7.84 (d, *J* = 8.1 Hz, 1H), 7.48-7.43 (m, 1H), 7.32-7.28 (m, 1H), 7.22 (d, *J* = 8.3 Hz, 1H), 6.98 (d, *J* = 8.7 Hz, 2H), 3.91 (s, 3H), 3.89 (s, 3H). <sup>13</sup>C NMR (100 MHz, CDCl<sub>3</sub>; δ, ppm): 184.2, 163.9, 132.1, 131.0, 129.6, 126.7, 123.9, 121.9, 120.4, 118.9, 113.6, 107.1, 55.5, 29.1. IR (KBr, ν, cm<sup>-1</sup>): 2965, 1606, 1573, 1505, 1433, 1302, 1269, 1177, 1099, 1018, 886, 732. HRMS (APCI-TOF, *m/z*): calcd for C<sub>16</sub>H<sub>15</sub>N<sub>2</sub>O<sub>3</sub> [M+H]<sup>+</sup> 283.1077, found 283.1074.

### 3-(4-(*tert*-butyl)benzoyl)-1-methyl-1H-indazole 2-oxide (3f)

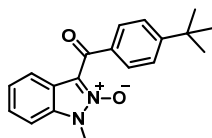

Yellow solid, 27 mg, 44% yield; mp 129-131 °C. <sup>1</sup>H NMR (400 MHz, CDCl<sub>3</sub>; δ, ppm): 7.89-7.85 (m, 3H), 7.51 (d, *J* = 8.4 Hz, 2H), 7.48-7.44 (m, 1H), 7.33-7.29 (m, 1H), 7.23 (d, *J* = 8.3 Hz, 1H), 3.91 (s, 3H), 1.36 (s, 9H). <sup>13</sup>C NMR (100 MHz, CDCl<sub>3</sub>; δ, ppm): 185.5, 157.0, 134.3, 131.0, 129.4, 126.7, 125.3, 124.0, 121.8, 120.5, 118.9, 107.2, 35.2, 31.1, 29.1. IR (KBr, ν, cm<sup>-1</sup>): 2962, 1652, 1603, 1507, 1456, 1303, 1261, 1126, 1048, 885. HRMS (APCI-TOF, *m/z*): calcd for C<sub>19</sub>H<sub>21</sub>N<sub>2</sub>O<sub>2</sub> [M+H]<sup>+</sup> 309.1597, found 309.1600.

### 3-(2-naphthoyl)-1-methyl-1H-indazole 2-oxide (3g)

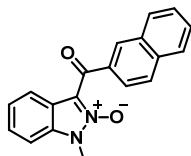

Yellow solid, 18 mg, 30% yield; mp 160-162 °C. <sup>1</sup>H NMR (400 MHz, CDCl<sub>3</sub>; δ, ppm): 8.44 (s, 1H), 7.95 (d, *J* = 7.7 Hz, 3H), 7.92-7.85 (m, 2H), 7.63-7.58 (m, 1H), 7.56-7.51 (m, 1H), 7.50-7.45 (m, 1H), 7.33-7.29 (m, 1H), 7.24 (s, 1H), 3.93 (s, 3H). <sup>13</sup>C NMR (100 MHz, CDCl<sub>3</sub>; δ, ppm): 185.7, 135.7, 134.6, 132.5, 131.1, 131.0, 129.7, 128.4, 128.0, 127.8, 126.7, 126.6, 125.0, 124.1, 121.9, 120.5, 118.8, 107.2, 29.1. IR (KBr, ν, cm<sup>-1</sup>): 2932, 1626, 1556, 1511, 1428, 1319, 1254, 1180, 1012, 885, 714. HRMS (APCI-TOF, *m/z*): calcd for C<sub>19</sub>H<sub>15</sub>N<sub>2</sub>O<sub>2</sub> [M+H]<sup>+</sup> 303.1128, found 303.1122.

### 1-methyl-3-(thiophene-2-carbonyl)-1H-indazole 2-oxide (3h)

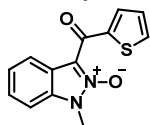

Brown solid, 18 mg, 35% yield; mp 127-129 °C. <sup>1</sup>H NMR (400 MHz, CDCl<sub>3</sub>; δ, ppm): 8.44 (d, *J* = 2.7 Hz, 1H), 7.96 (d, *J* = 8.1 Hz, 1H), 7.69 (d, *J* = 5.1 Hz, 1H), 7.48-7.44 (m, 1H), 7.35-7.29 (m, 2H), 7.22 (d, *J* = 8.3 Hz, 1H), 3.92 (s, 3H). <sup>13</sup>C NMR (100 MHz, CDCl<sub>3</sub>; δ, ppm): 178.6, 140.6, 134.5, 131.0, 128.1, 126.8, 125.3, 124.1, 122.3, 120.7, 118.8, 107.1, 29.1. IR (KBr, ν, cm<sup>-1</sup>): 3093, 1629, 1613, 1515, 1501, 1455, 1435, 1248, 849, 734. HRMS (APCI-TOF, *m/z*): calcd for C<sub>13</sub>H<sub>11</sub>N<sub>2</sub>O<sub>2</sub>S [M+H]<sup>+</sup> 259.0535, found 259.0530.

### 3-benzoyl-1-methyl-1H-indazole 2-oxide (3i)

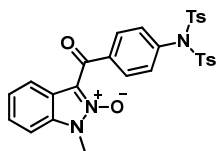

Yellow solid, 40 mg, 35% yield; mp 181-183 °C. <sup>1</sup>H NMR (400 MHz, CDCl<sub>3</sub>; δ, ppm): 7.92-7.86 (m, 3H), 7.83 (d, *J* = 8.3 Hz, 4H), 7.50-7.45 (m, 1H), 7.36-7.32 (m, 5H), 7.24 (d, *J* = 8.3 Hz, 1H), 7.15 (d, *J* = 8.4 Hz, 2H), 3.90 (s, 3H), 2.47 (s, 6H). <sup>13</sup>C NMR (100 MHz, CDCl<sub>3</sub>; δ, ppm): 184.7, 145.2, 138.4, 138.0, 136.4, 131.5, 130.9, 130.1, 129.7, 129.6, 128.6, 126.9, 124.4, 121.5, 120.4, 118.7, 107.3, 29.2, 21.8. IR (KBr, ν, cm<sup>-1</sup>): 1636, 1598, 1507, 1497, 1456, 1379, 1176, 1085, 915, 741, 659. HRMS (APCI-TOF, m/z): calcd for C<sub>29</sub>H<sub>26</sub>N<sub>3</sub>O<sub>6</sub>S<sub>2</sub> [M+H]<sup>+</sup> 576.1257, found 576.1260.

**5-fluoro-1-methyl-3-(4-methylbenzoyl)-1H-indazole 2-oxide (3j)**

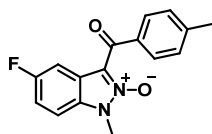

Light yellow solid, 22 mg, 38% yield; mp 159-161 °C. <sup>1</sup>H NMR (400 MHz, CDCl<sub>3</sub>; δ, ppm): 7.79 (d, *J* = 8.1 Hz, 2H), 7.60-7.54 (m, 1H), 7.30 (d, *J* = 8.0 Hz, 2H), 7.24-7.15 (m, 1H), 3.89 (s, 3H), 2.44 (s, 3H). <sup>13</sup>C NMR (100 MHz, CDCl<sub>3</sub>; δ, ppm): 185.2, 160.0 (<sup>1</sup>*J*<sub>CF</sub> = 239.6 Hz), 144.16, 134.27, 129.03, 127.41, 119.5 (<sup>1</sup>*J*<sub>CF</sub> = 11.7 Hz), 115.5 (<sup>1</sup>*J*<sub>CF</sub> = 26.6 Hz), 108.4 (<sup>1</sup>*J*<sub>CF</sub> = 9.2 Hz), 106.0 (<sup>1</sup>*J*<sub>CF</sub> = 26.4 Hz), 29.32, 21.85. IR (KBr, ν, cm<sup>-1</sup>): 2966, 1606, 1517, 1503, 1424, 1361, 1266, 1179, 837, 734. HRMS (APCI-TOF, m/z): calcd for C<sub>16</sub>H<sub>14</sub>FN<sub>2</sub>O<sub>2</sub> [M+H]<sup>+</sup> 285.1033, found 285.1038.

**5-chloro-1-methyl-3-(4-methylbenzoyl)-1H-indazole 2-oxide (3k)**

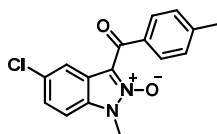

Light yellow solid, 16 mg, 27% yield; mp 156-158 °C. <sup>1</sup>H NMR (400 MHz, CDCl<sub>3</sub>; δ, ppm): 7.90 (d, *J* = 1.7 Hz, 1H), 7.79 (d, *J* = 8.1 Hz, 2H), 7.44-7.40 (m, 1H), 7.30 (d, *J* = 8.0 Hz, 2H), 7.15 (d, *J* = 8.7 Hz, 1H), 3.89 (s, 3H), 2.45 (s, 3H). <sup>13</sup>C NMR (100 MHz, CDCl<sub>3</sub>; δ, ppm): 185.1, 144.3, 134.2, 130.0, 129.5, 129.2, 129.1, 127.2, 121.4, 119.9, 119.8, 108.3, 29.3, 21.9. IR (KBr, ν, cm<sup>-1</sup>): 2924, 1747, 1609, 1506, 1473, 1456, 1263, 1240, 1179, 1080, 794, 745. HRMS (APCI-TOF, m/z): calcd for C<sub>16</sub>H<sub>14</sub>ClN<sub>2</sub>O<sub>2</sub> [M+H]<sup>+</sup> 301.0738, found 301.0737.



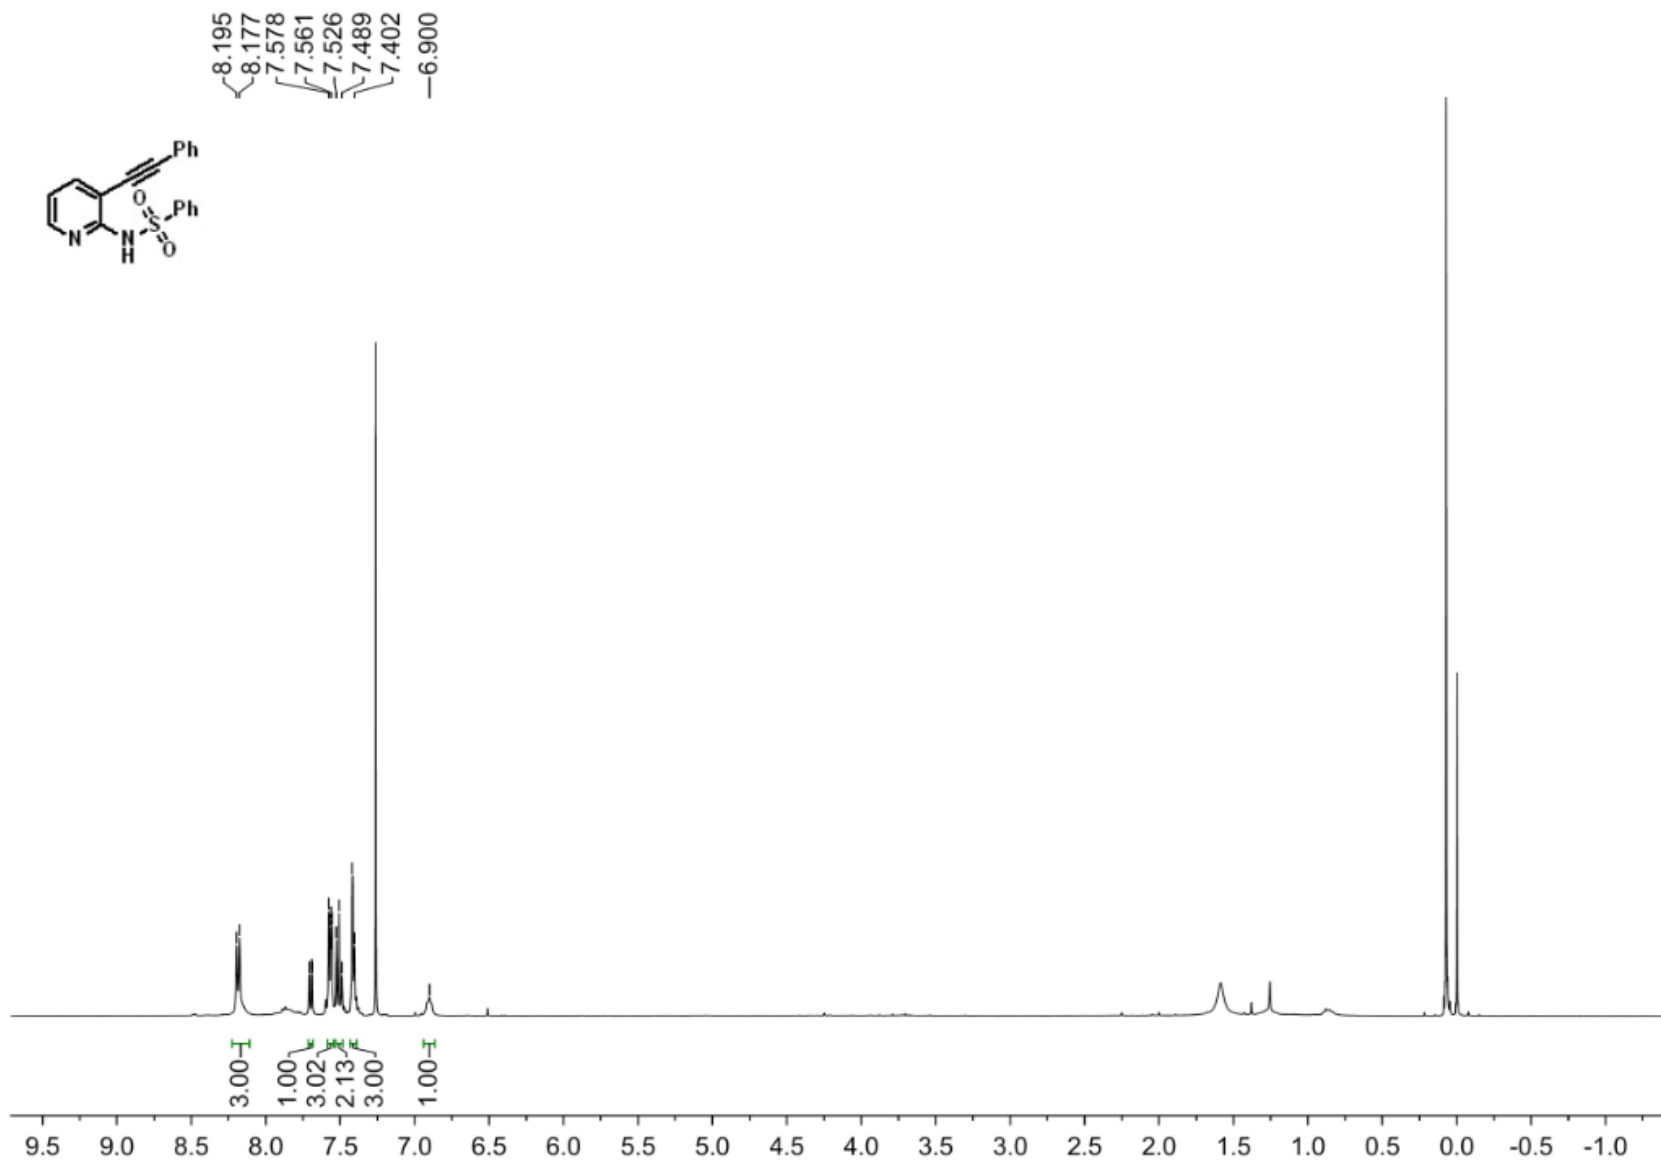

<sup>1</sup>H NMR Spectrum of *N*-Tosyl 3-(Phenylethynyl)pyridin-2-amine **1ab**

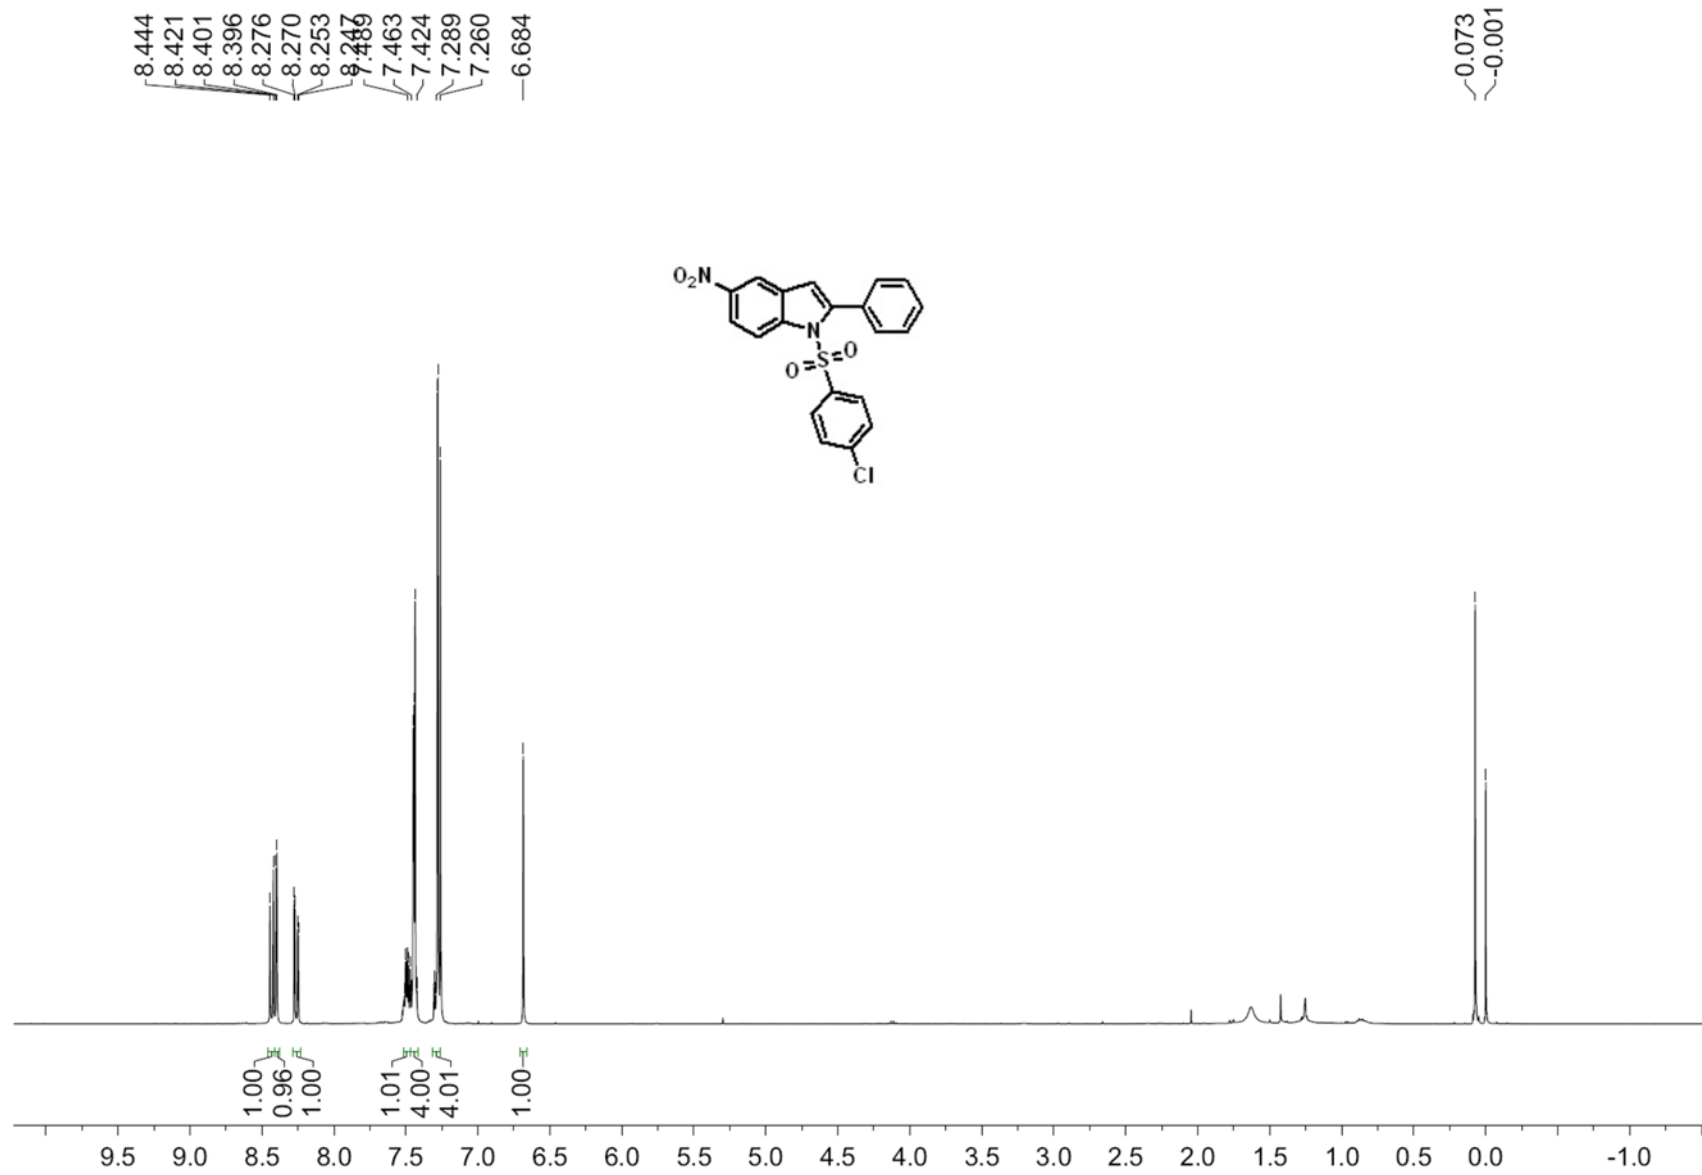

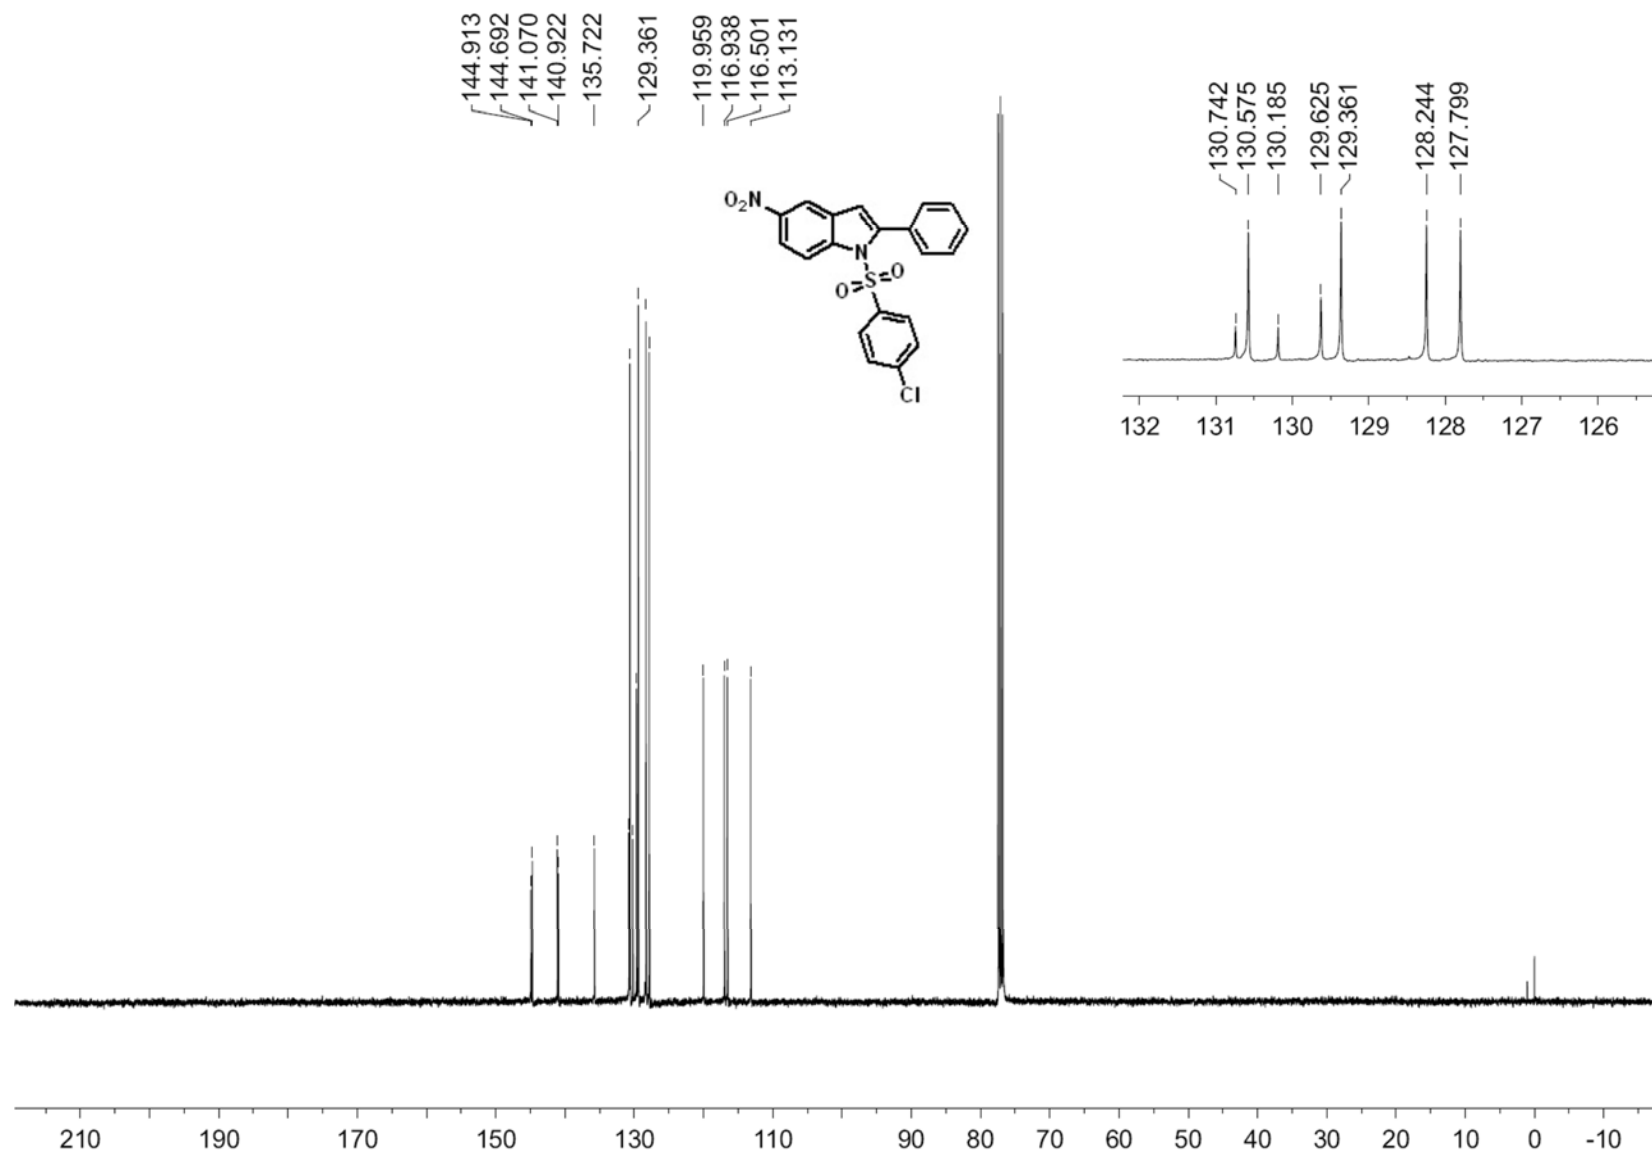

<sup>13</sup>C NMR Spectrum of Compound 2a

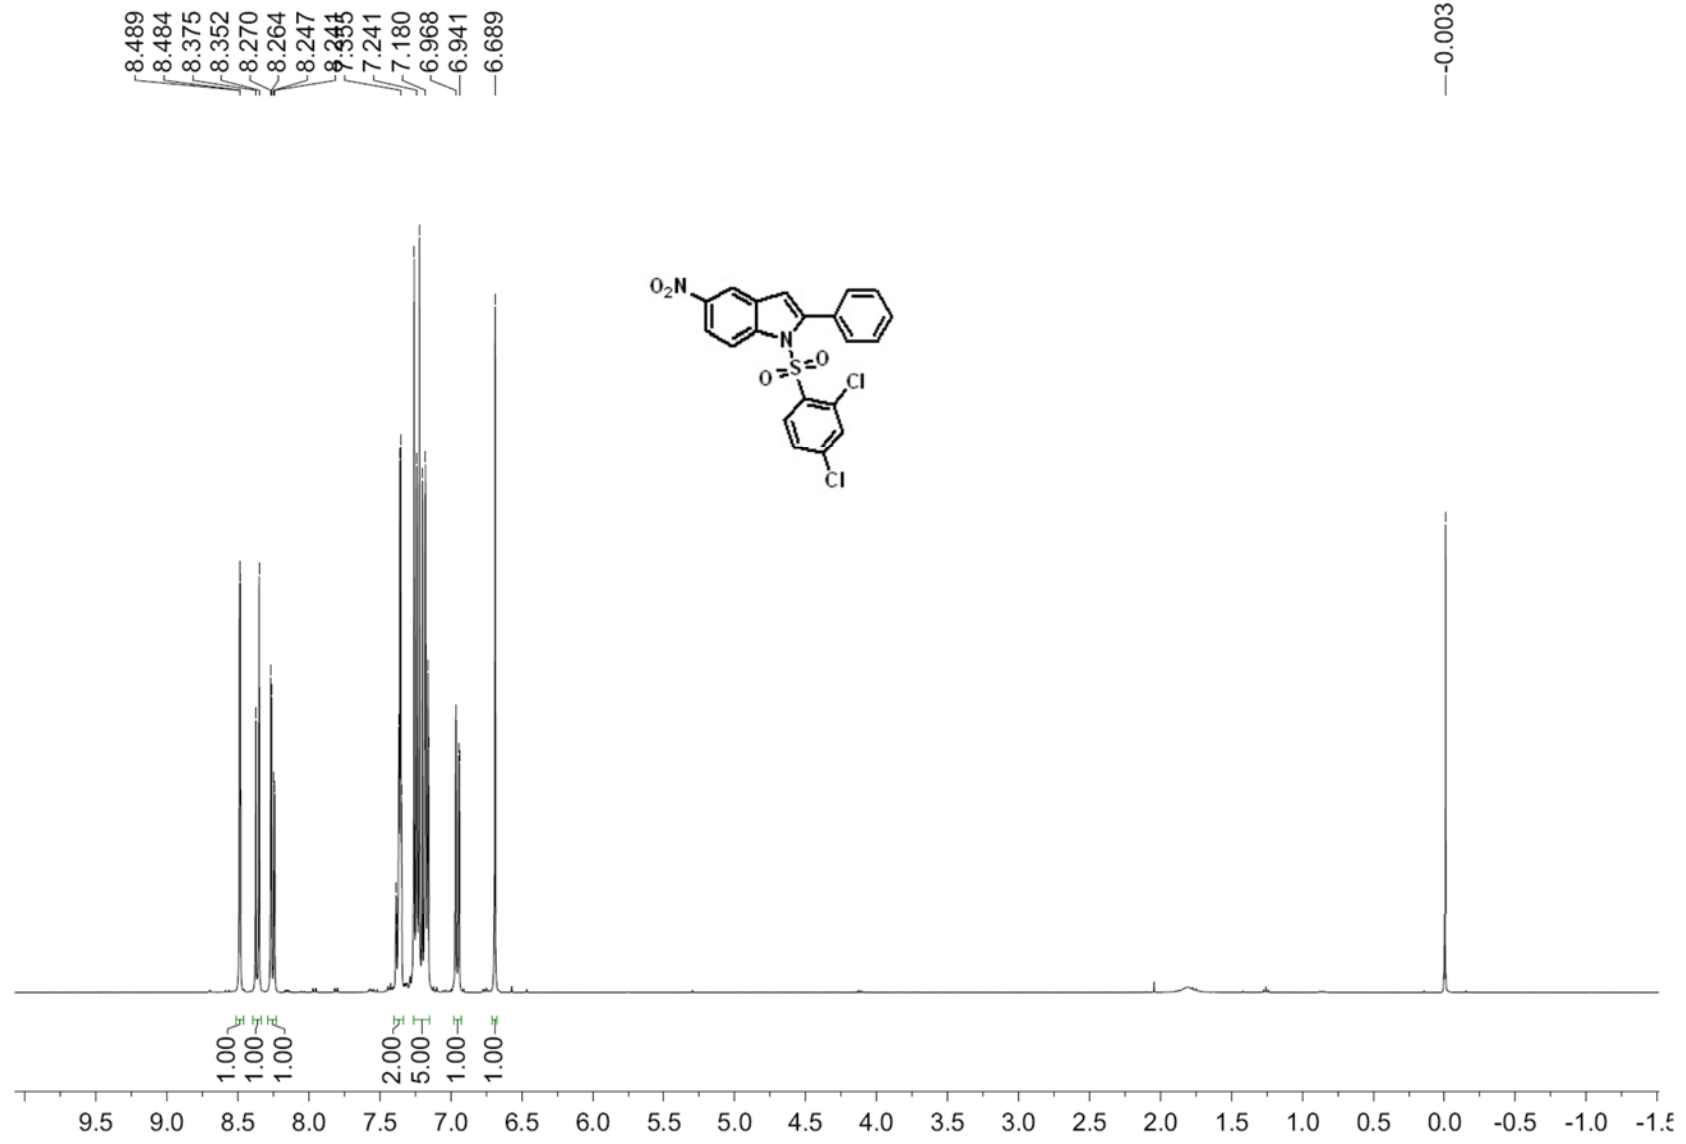

<sup>1</sup>H NMR Spectrum of Compound **2b**

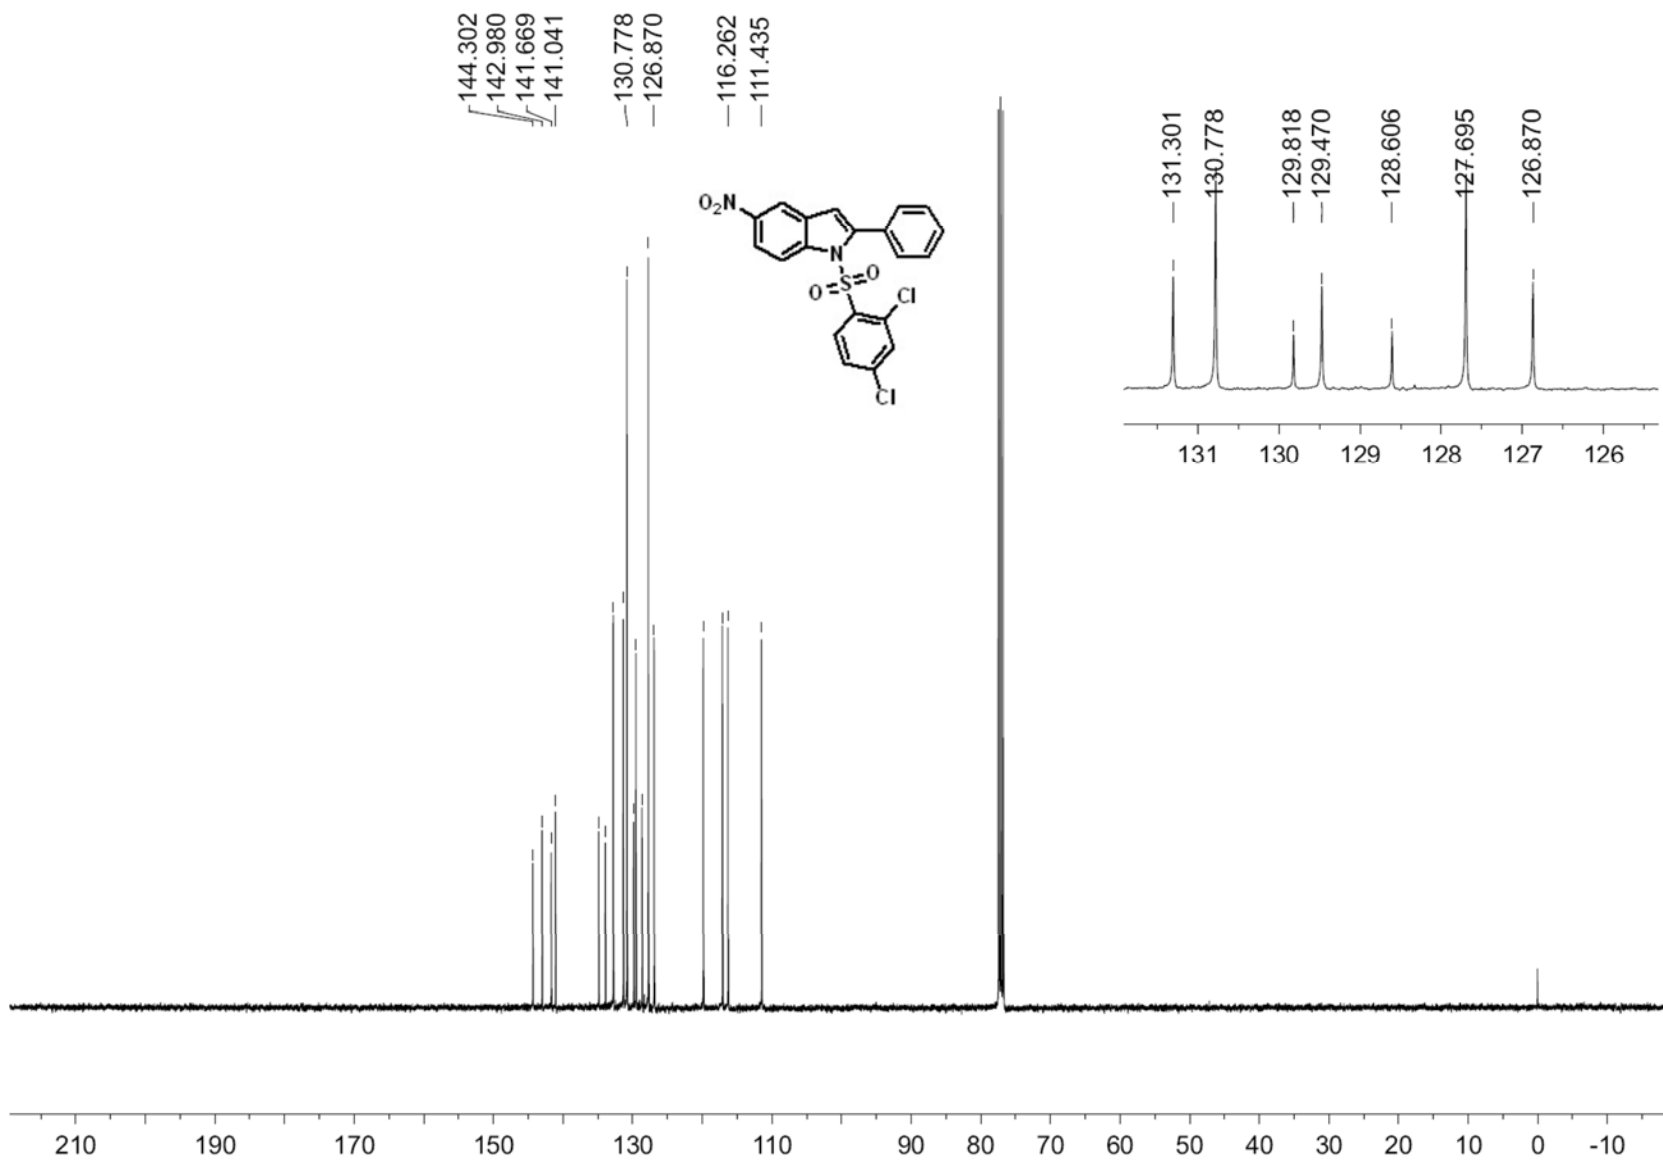

<sup>13</sup>C NMR Spectrum of Compound **2b**

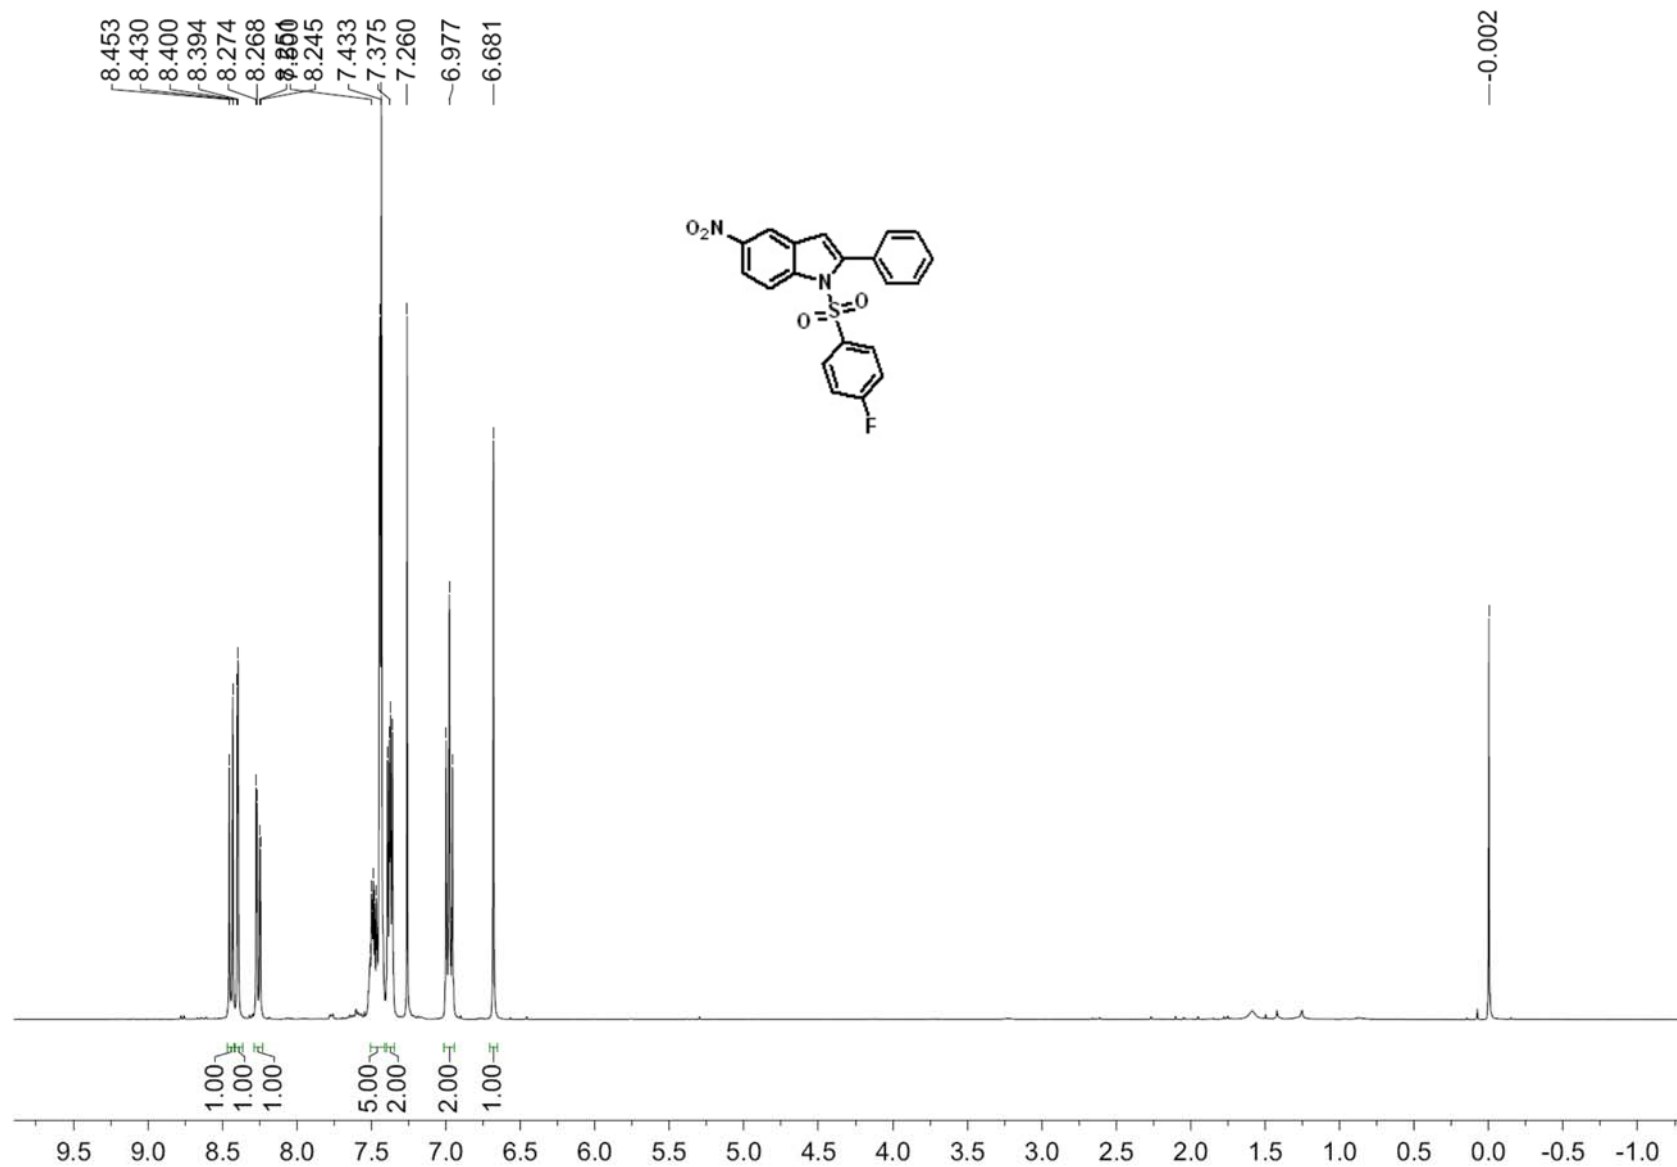

<sup>1</sup>H NMR Spectrum of Compound 2c

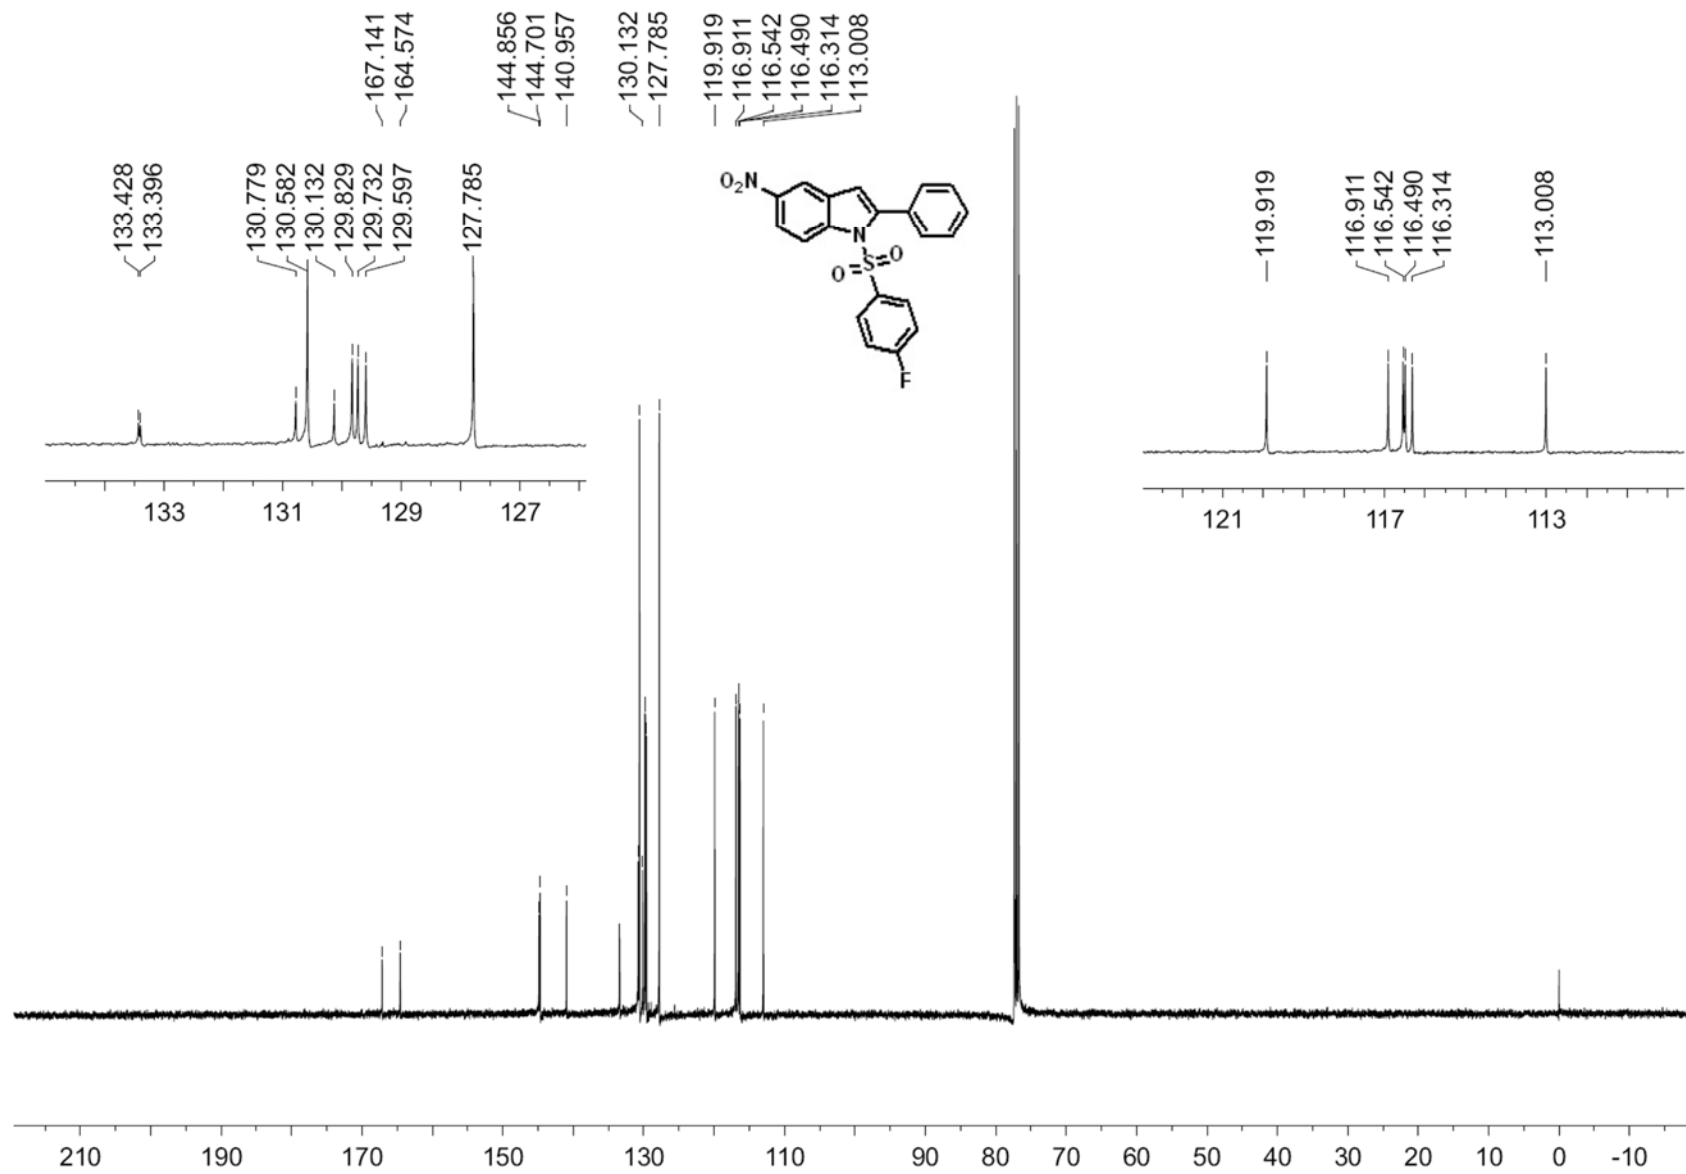

<sup>13</sup>C NMR Spectrum of Compound 2c

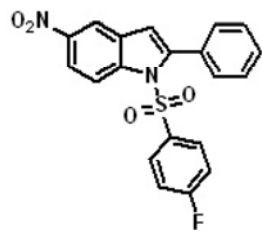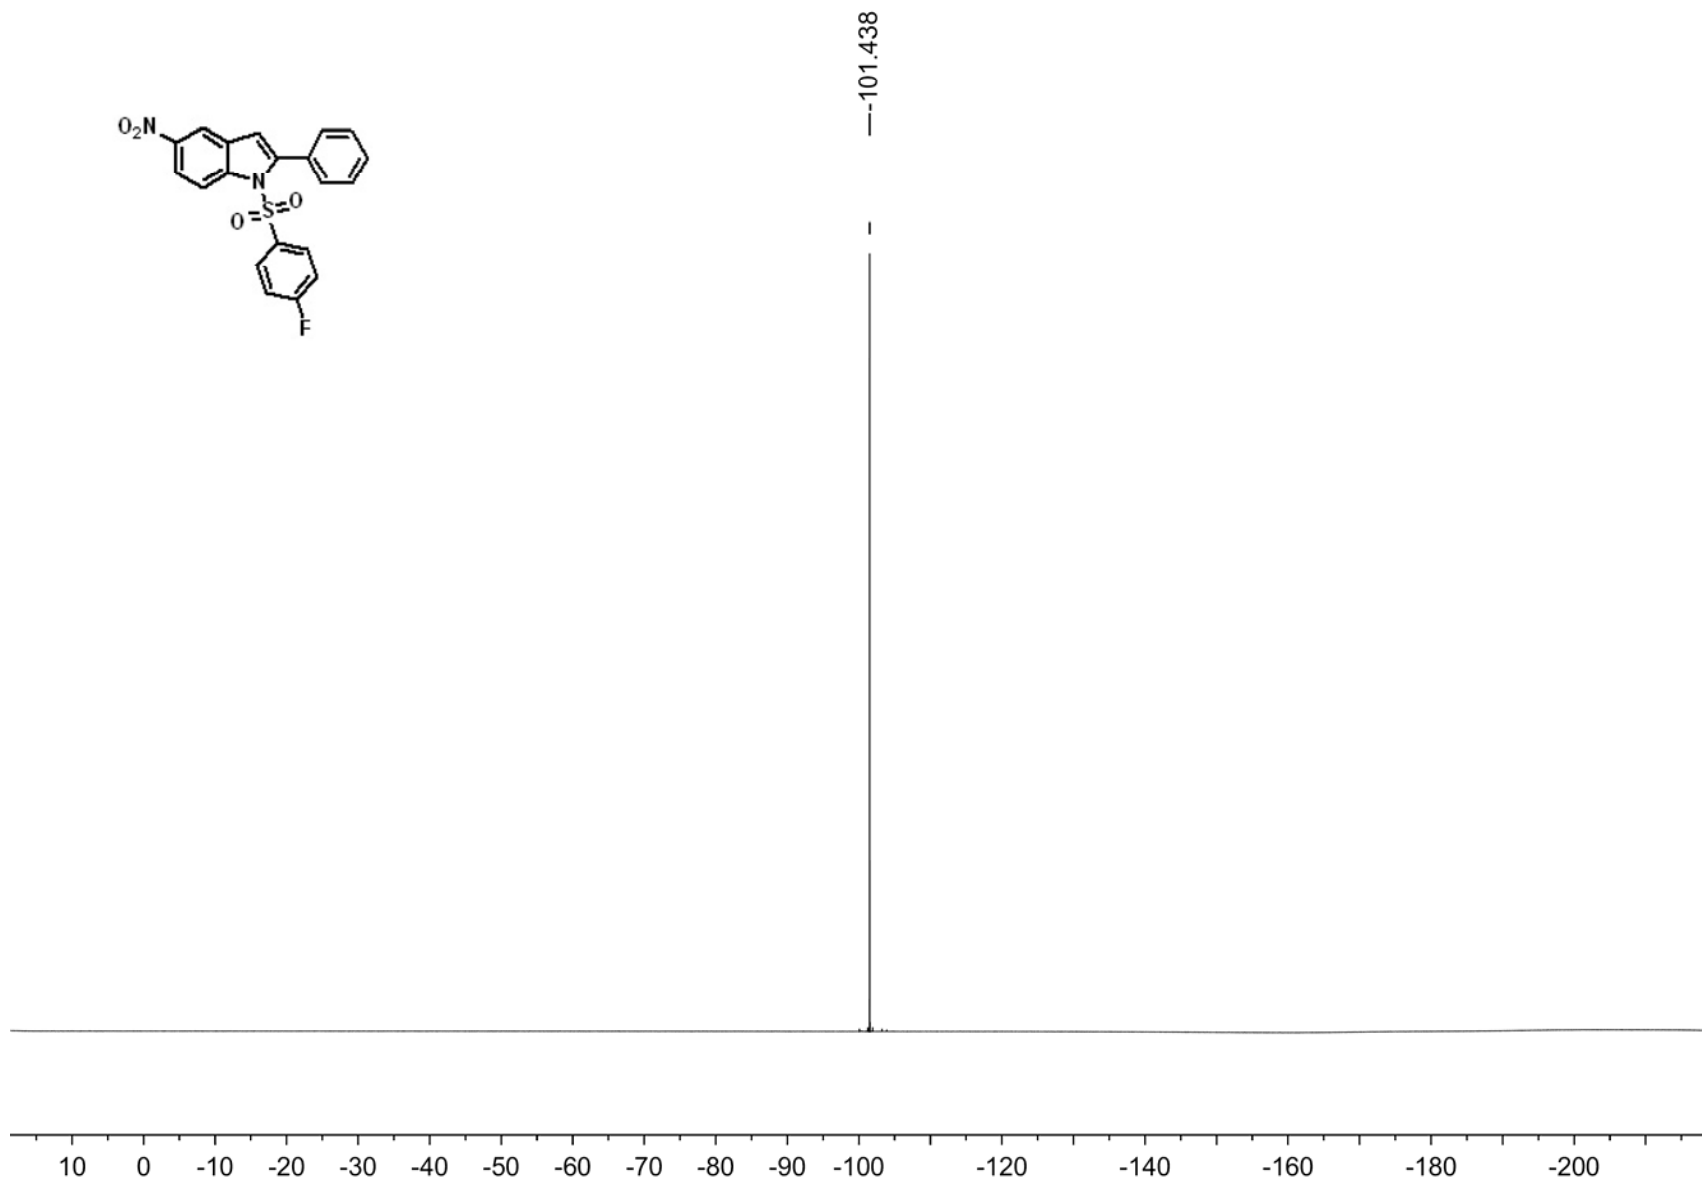

$^{19}\text{F}$  NMR Spectrum of Compound 2c



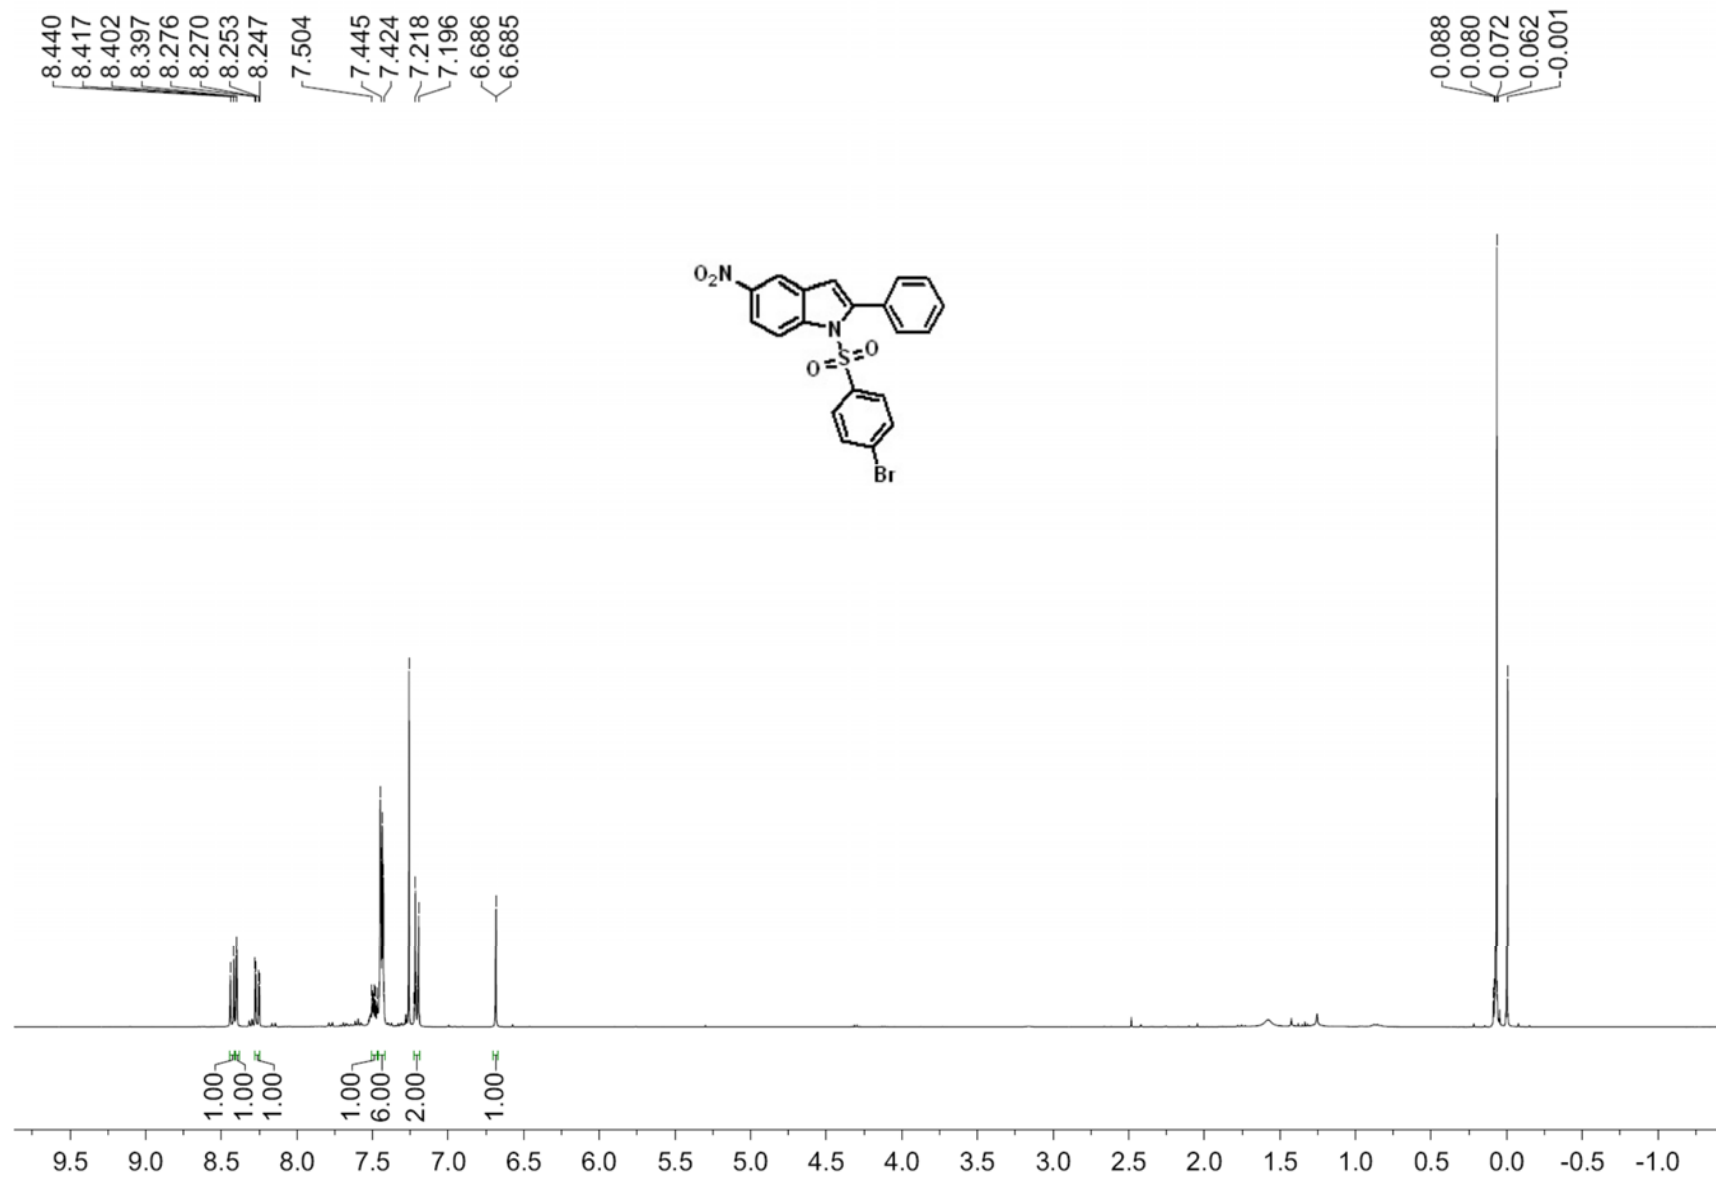

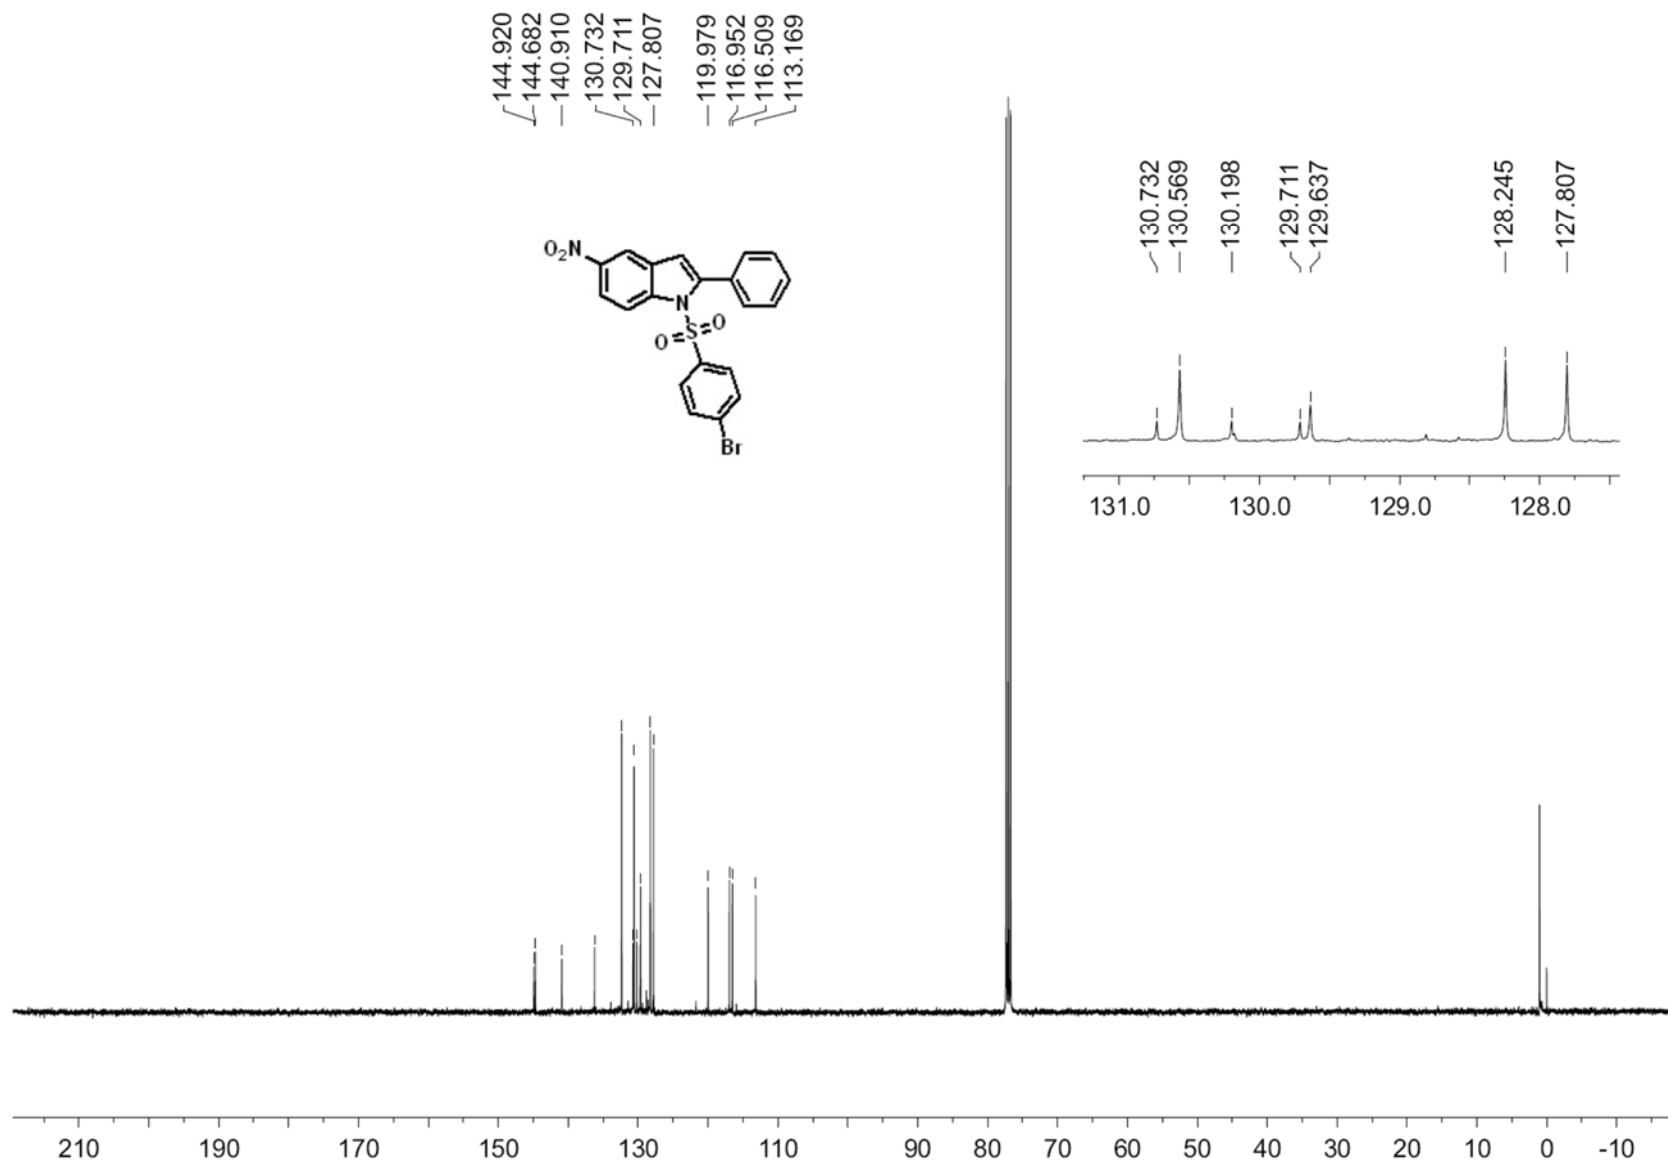

<sup>13</sup>C NMR Spectrum of Compound **2d**

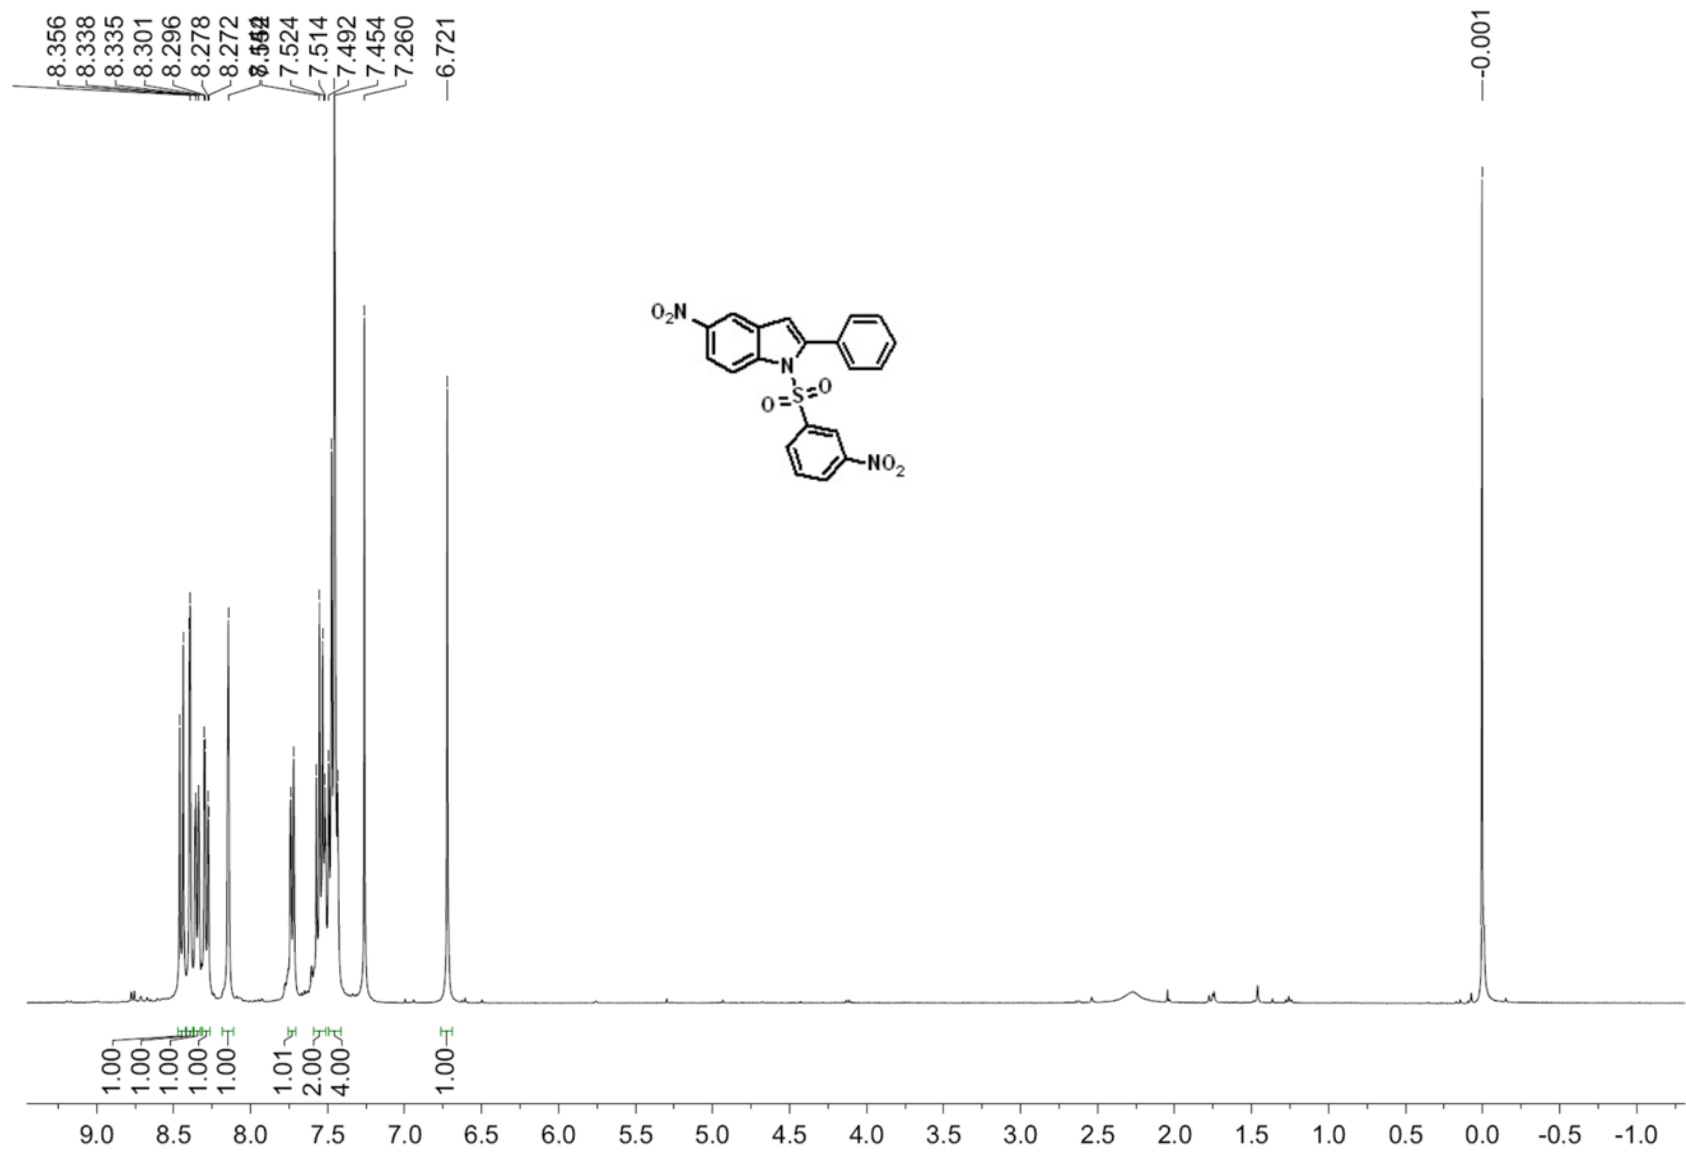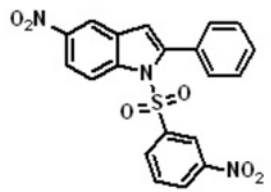

<sup>1</sup>H NMR Spectrum of Compound 2e

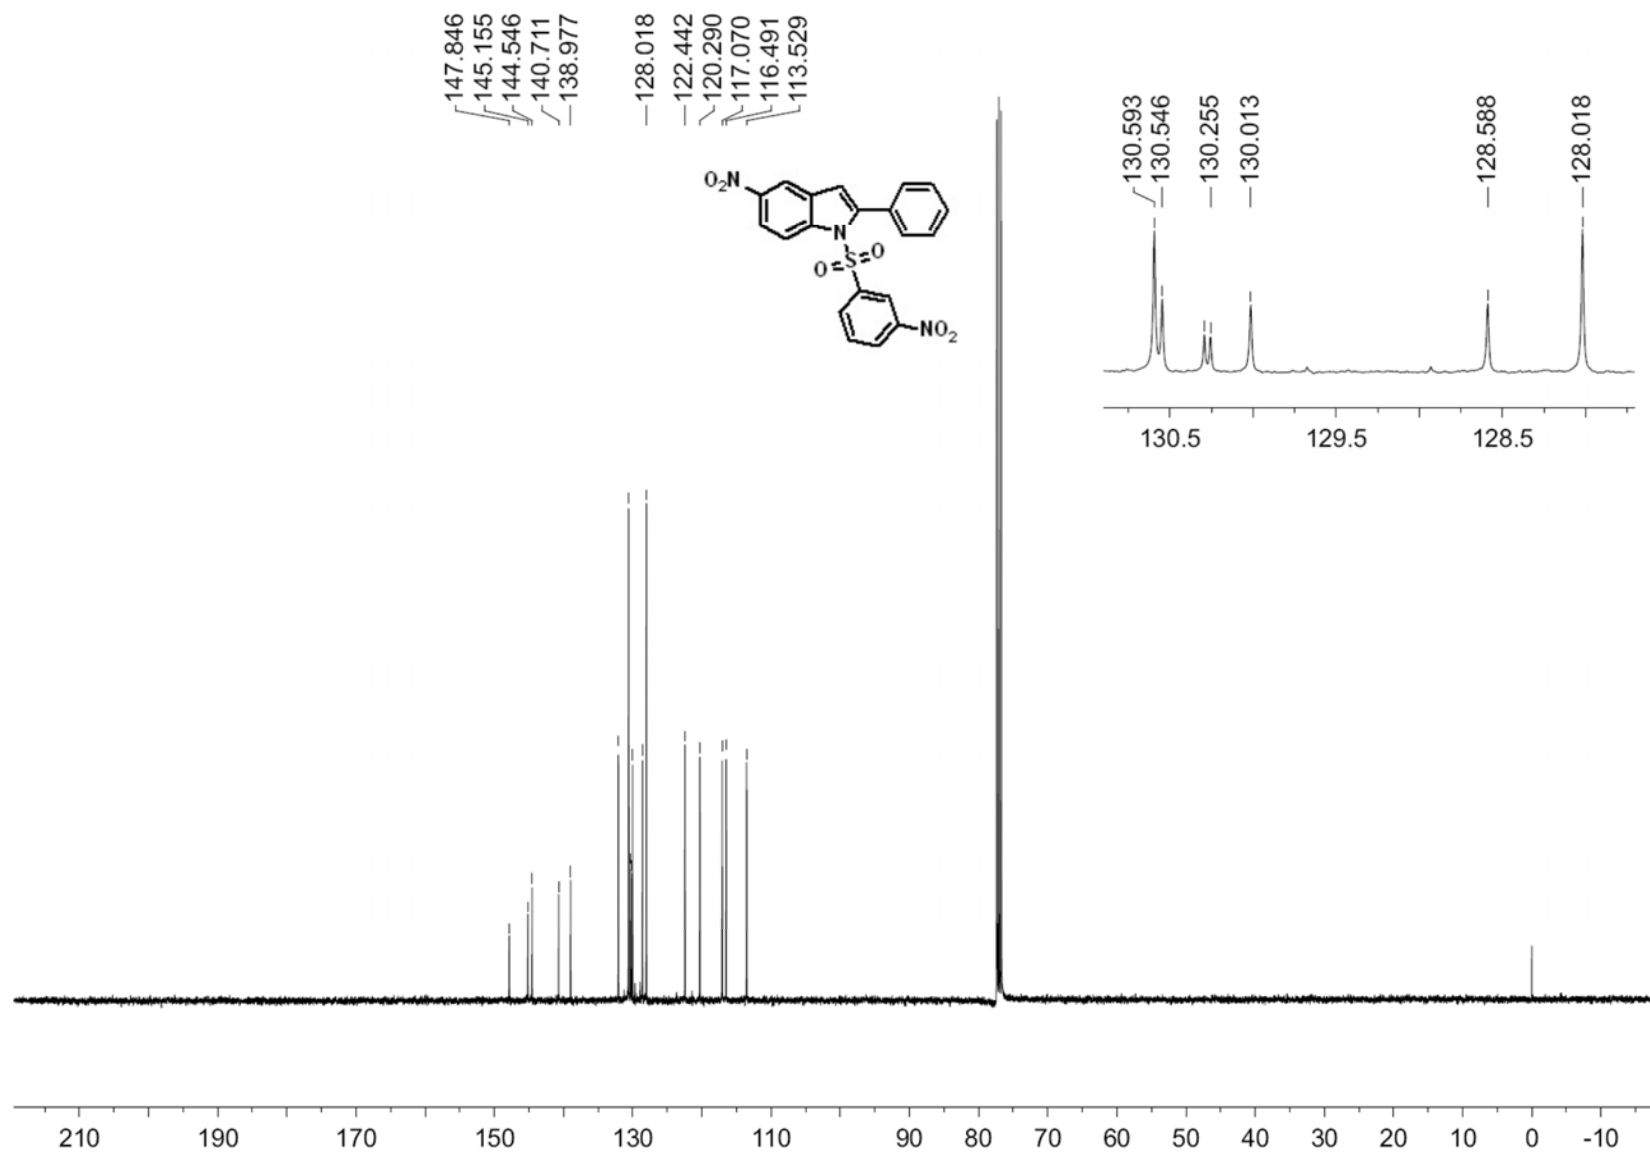

$^{13}\text{C}$  NMR Spectrum of Compound **2e**

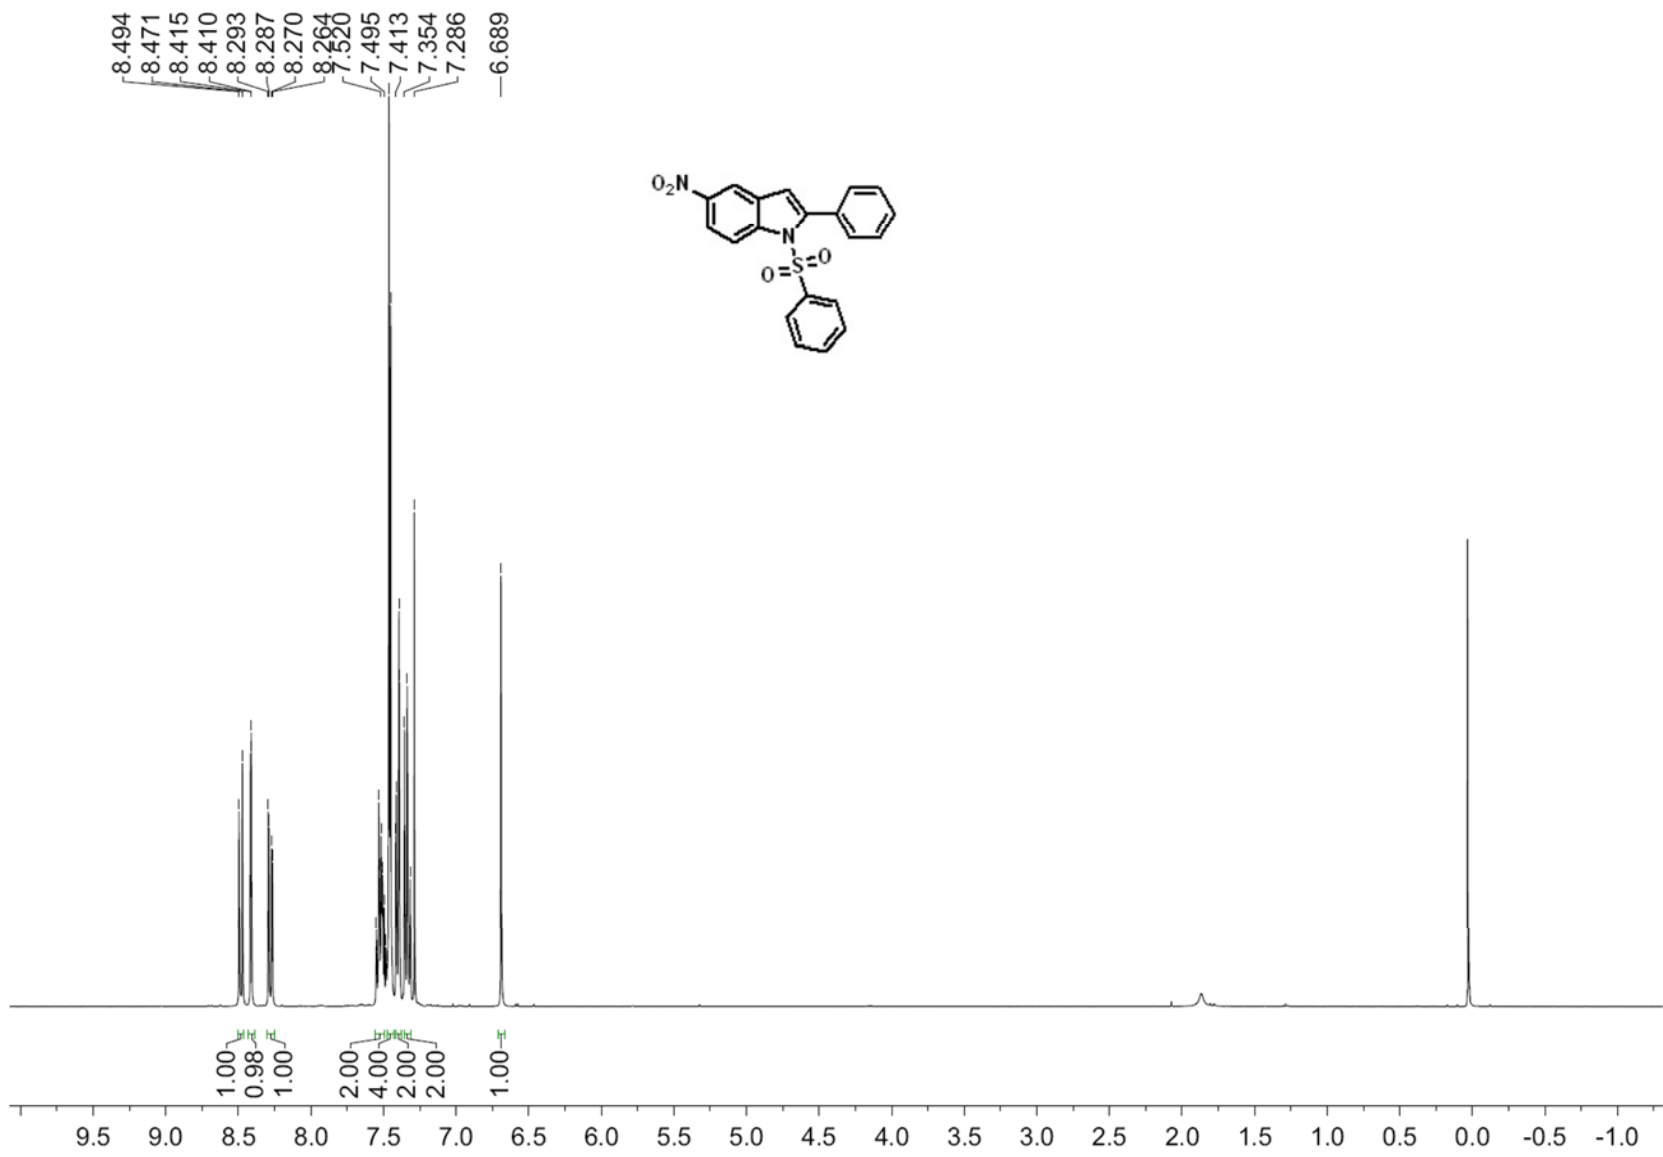

<sup>1</sup>H NMR Spectrum of Compound 2f

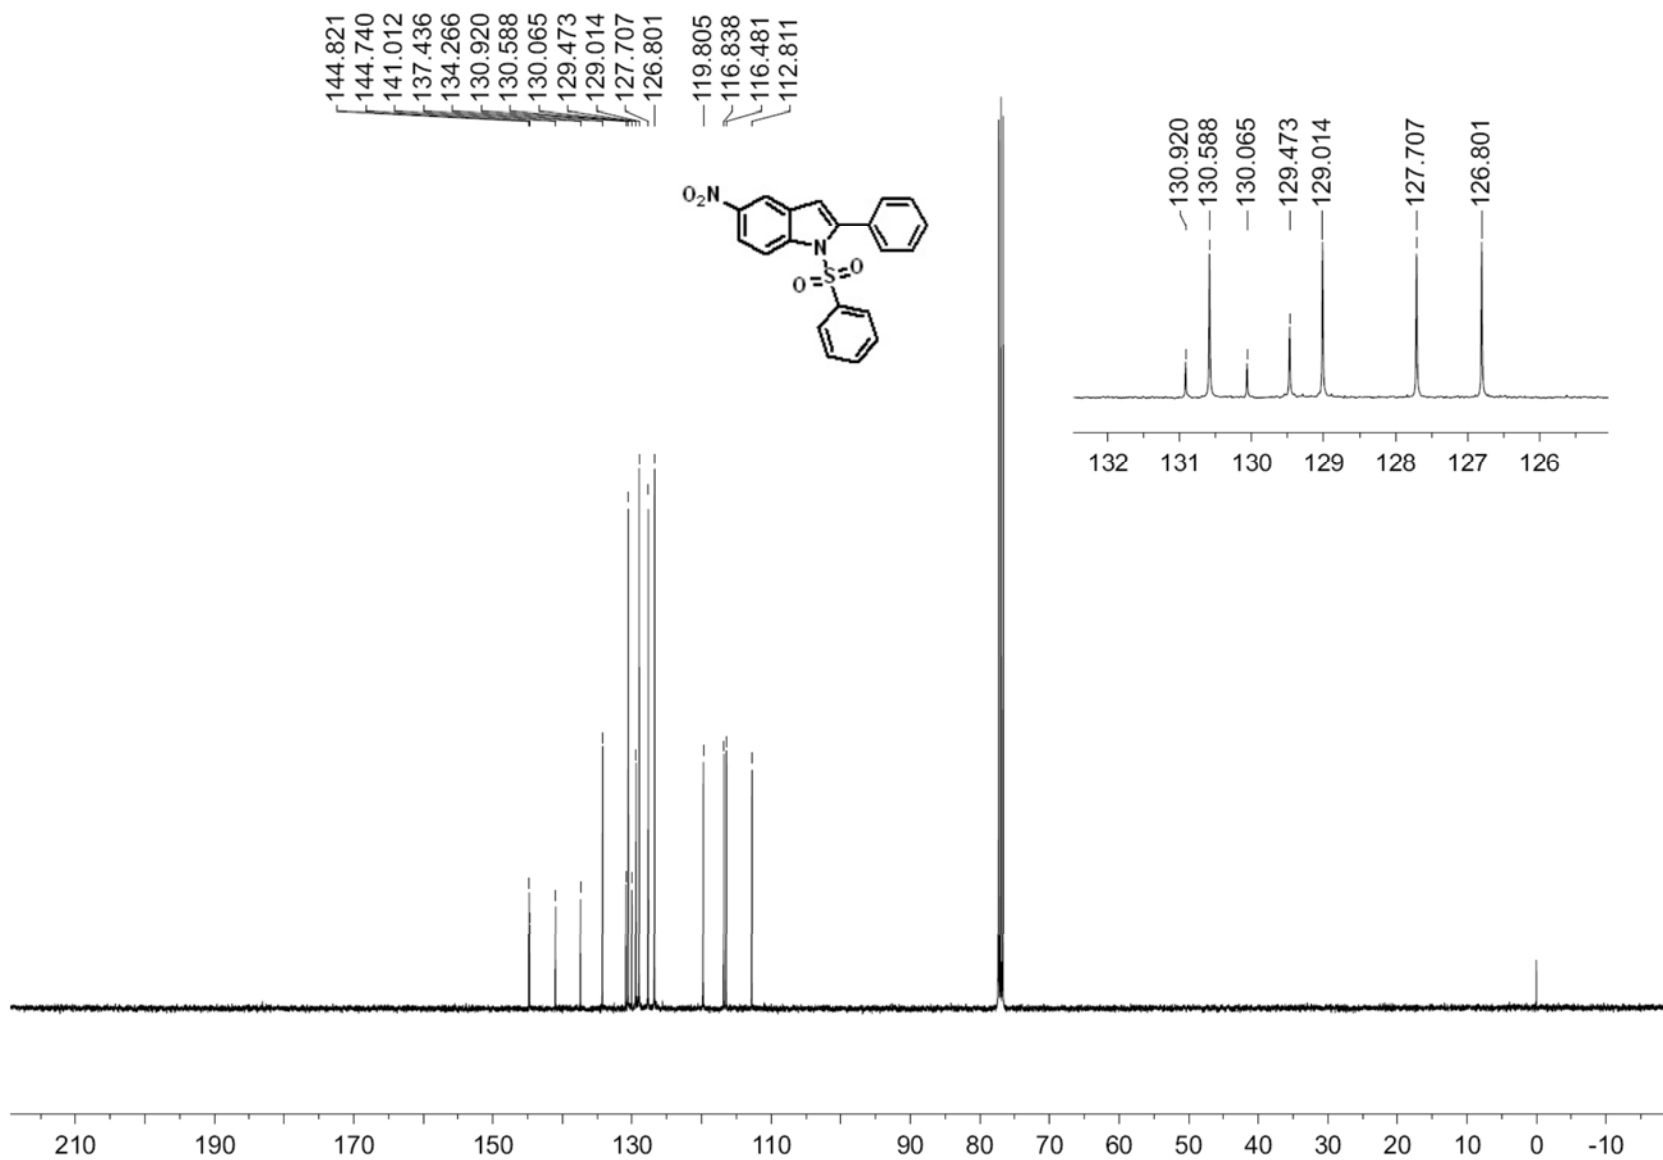

<sup>13</sup>C NMR Spectrum of Compound 2f

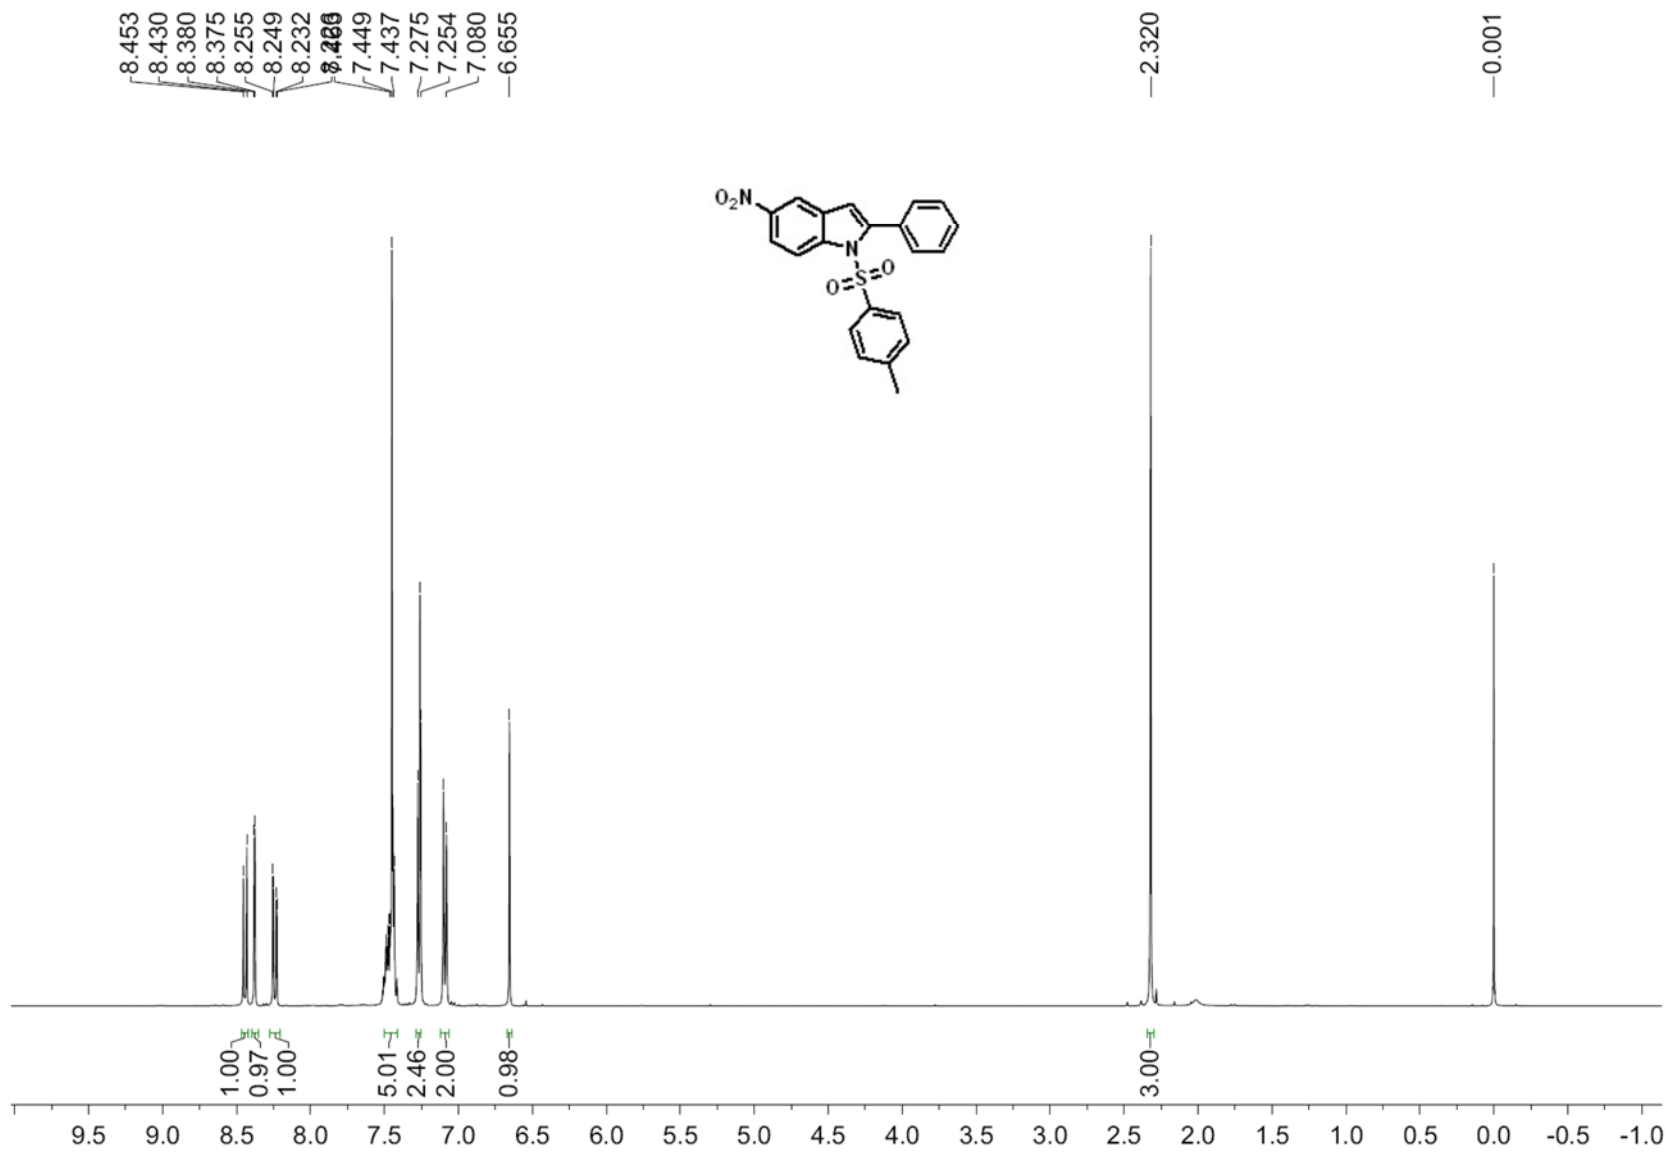

<sup>1</sup>H NMR Spectrum of Compound 2g

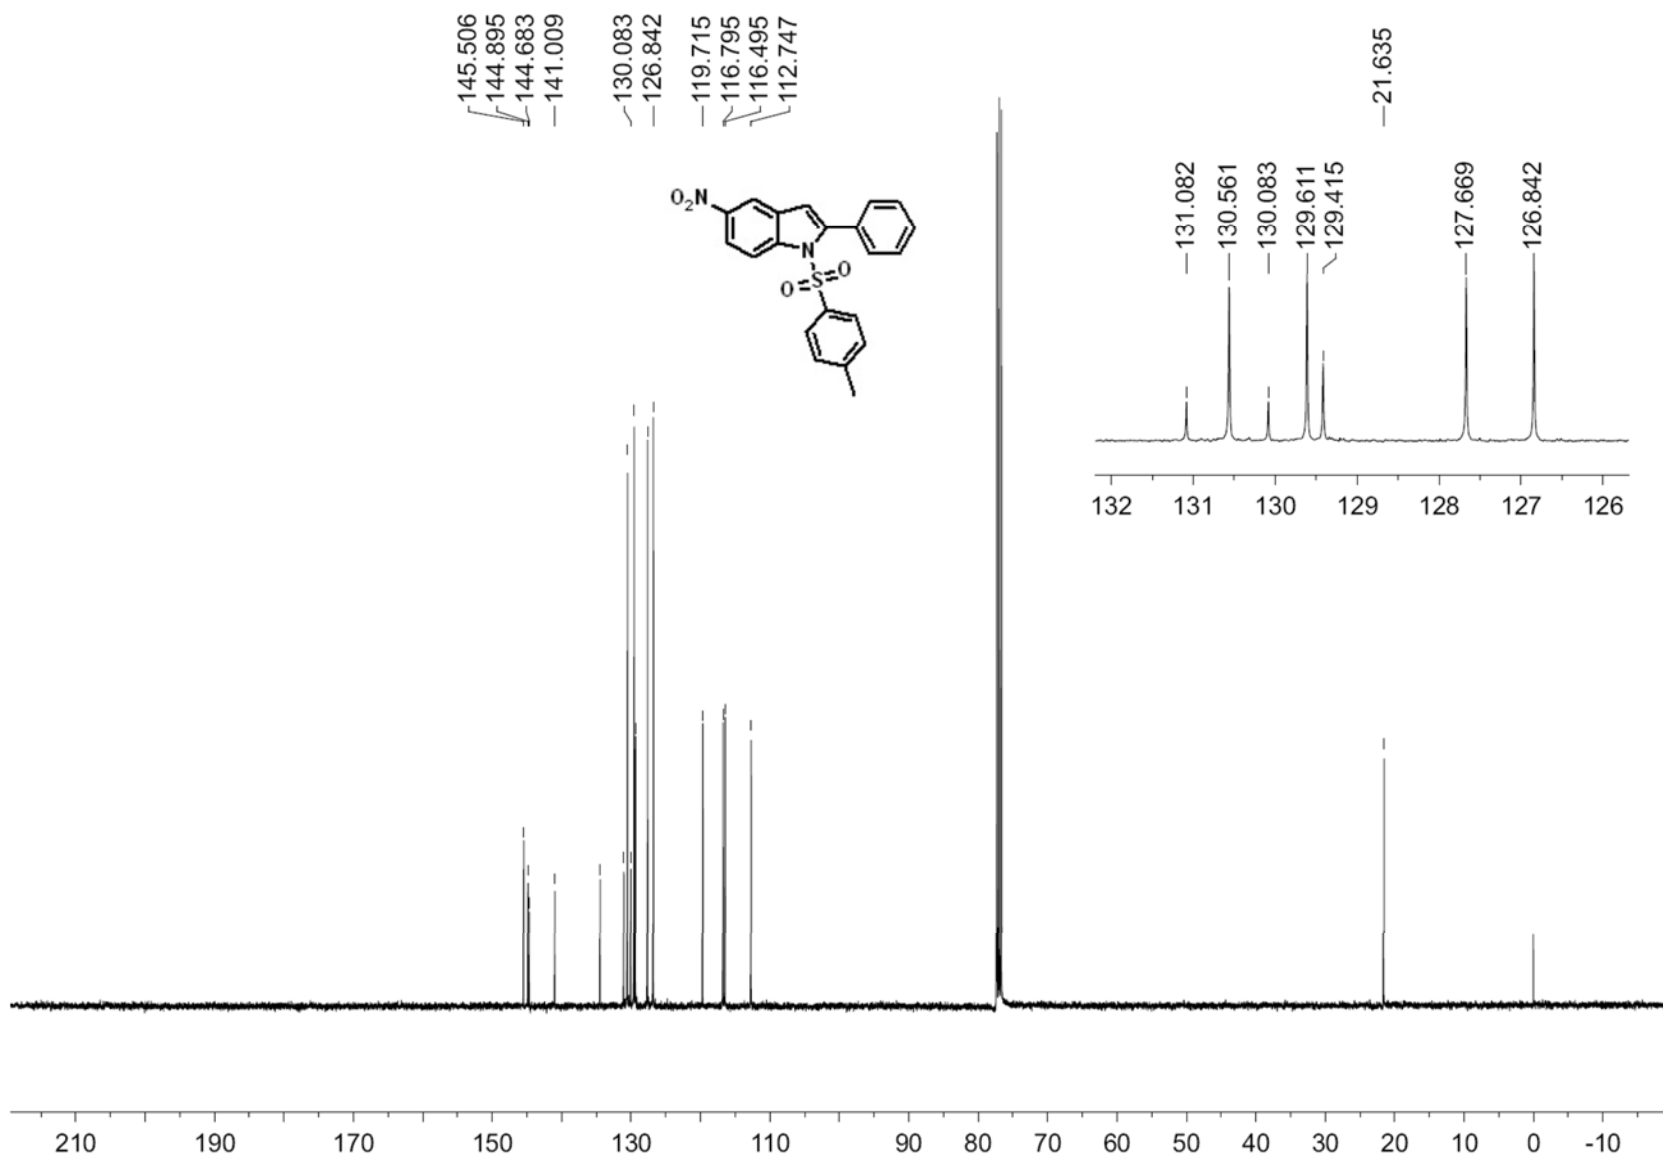

<sup>13</sup>C NMR Spectrum of Compound 2g



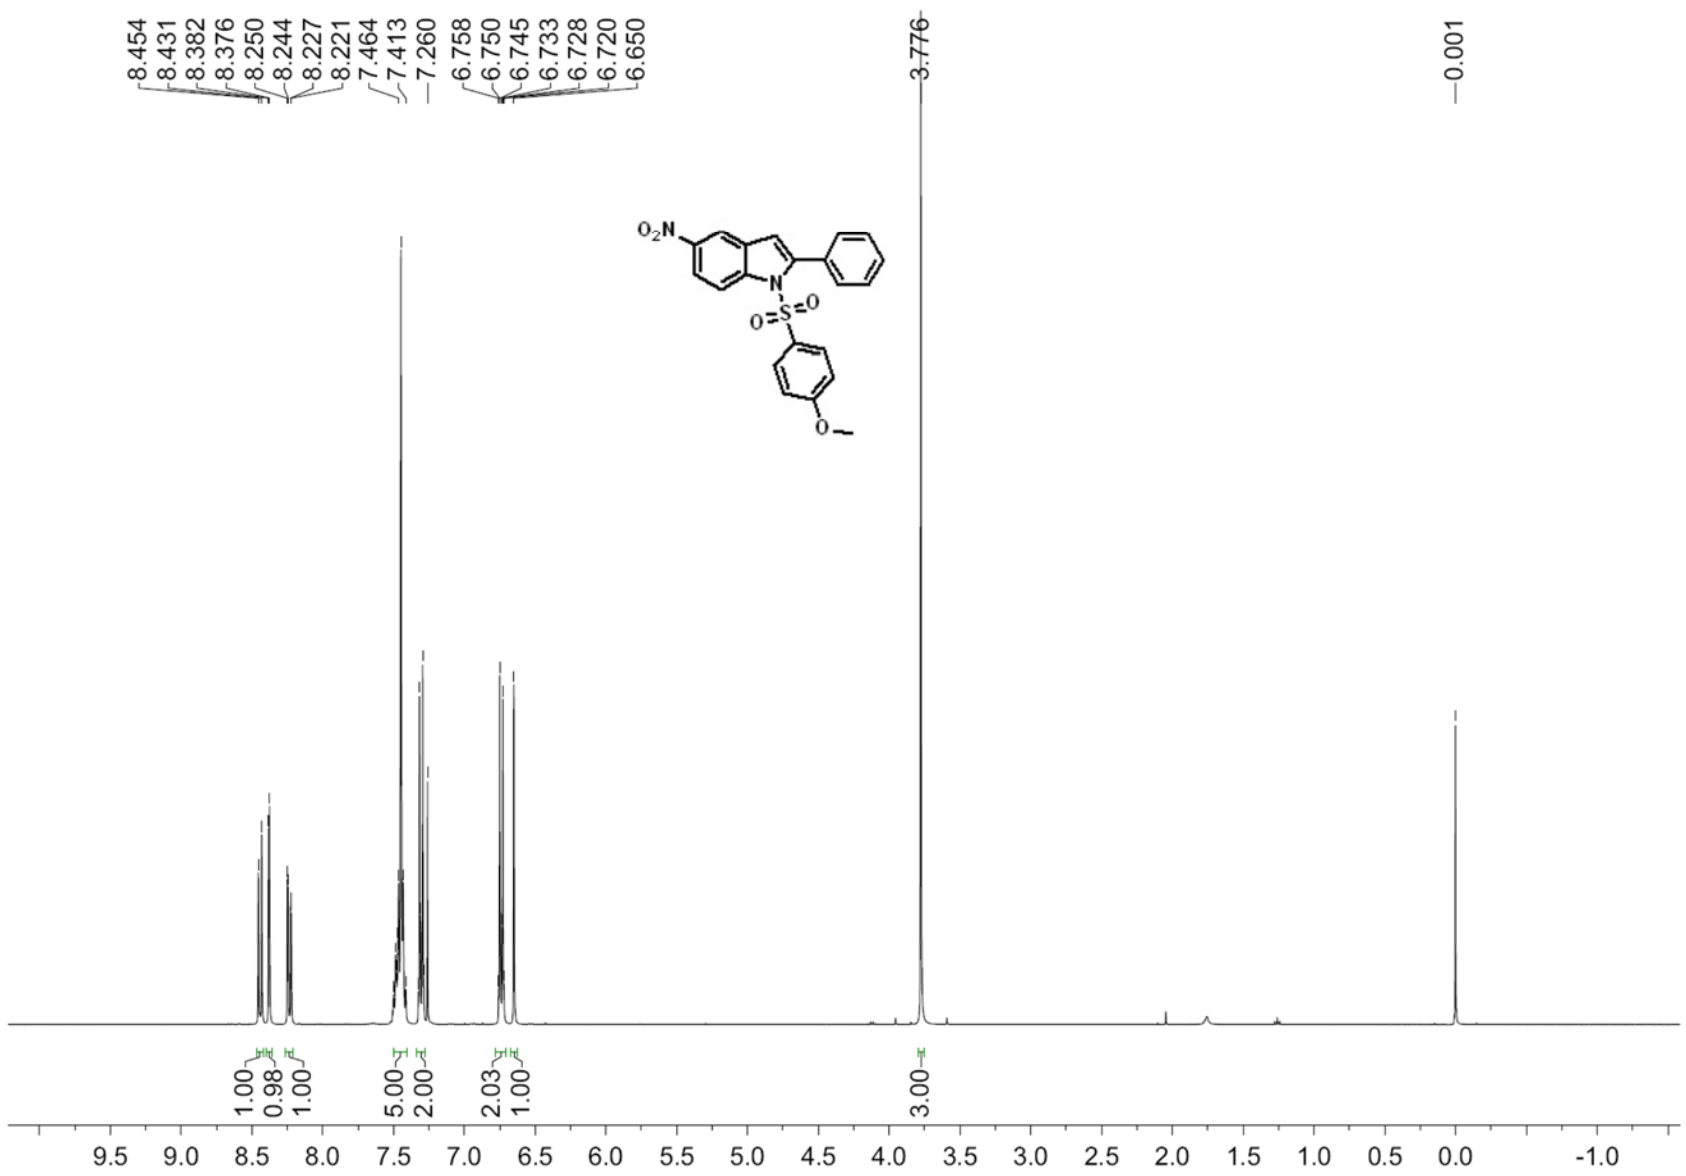

<sup>1</sup>H NMR Spectrum of Compound **2h**

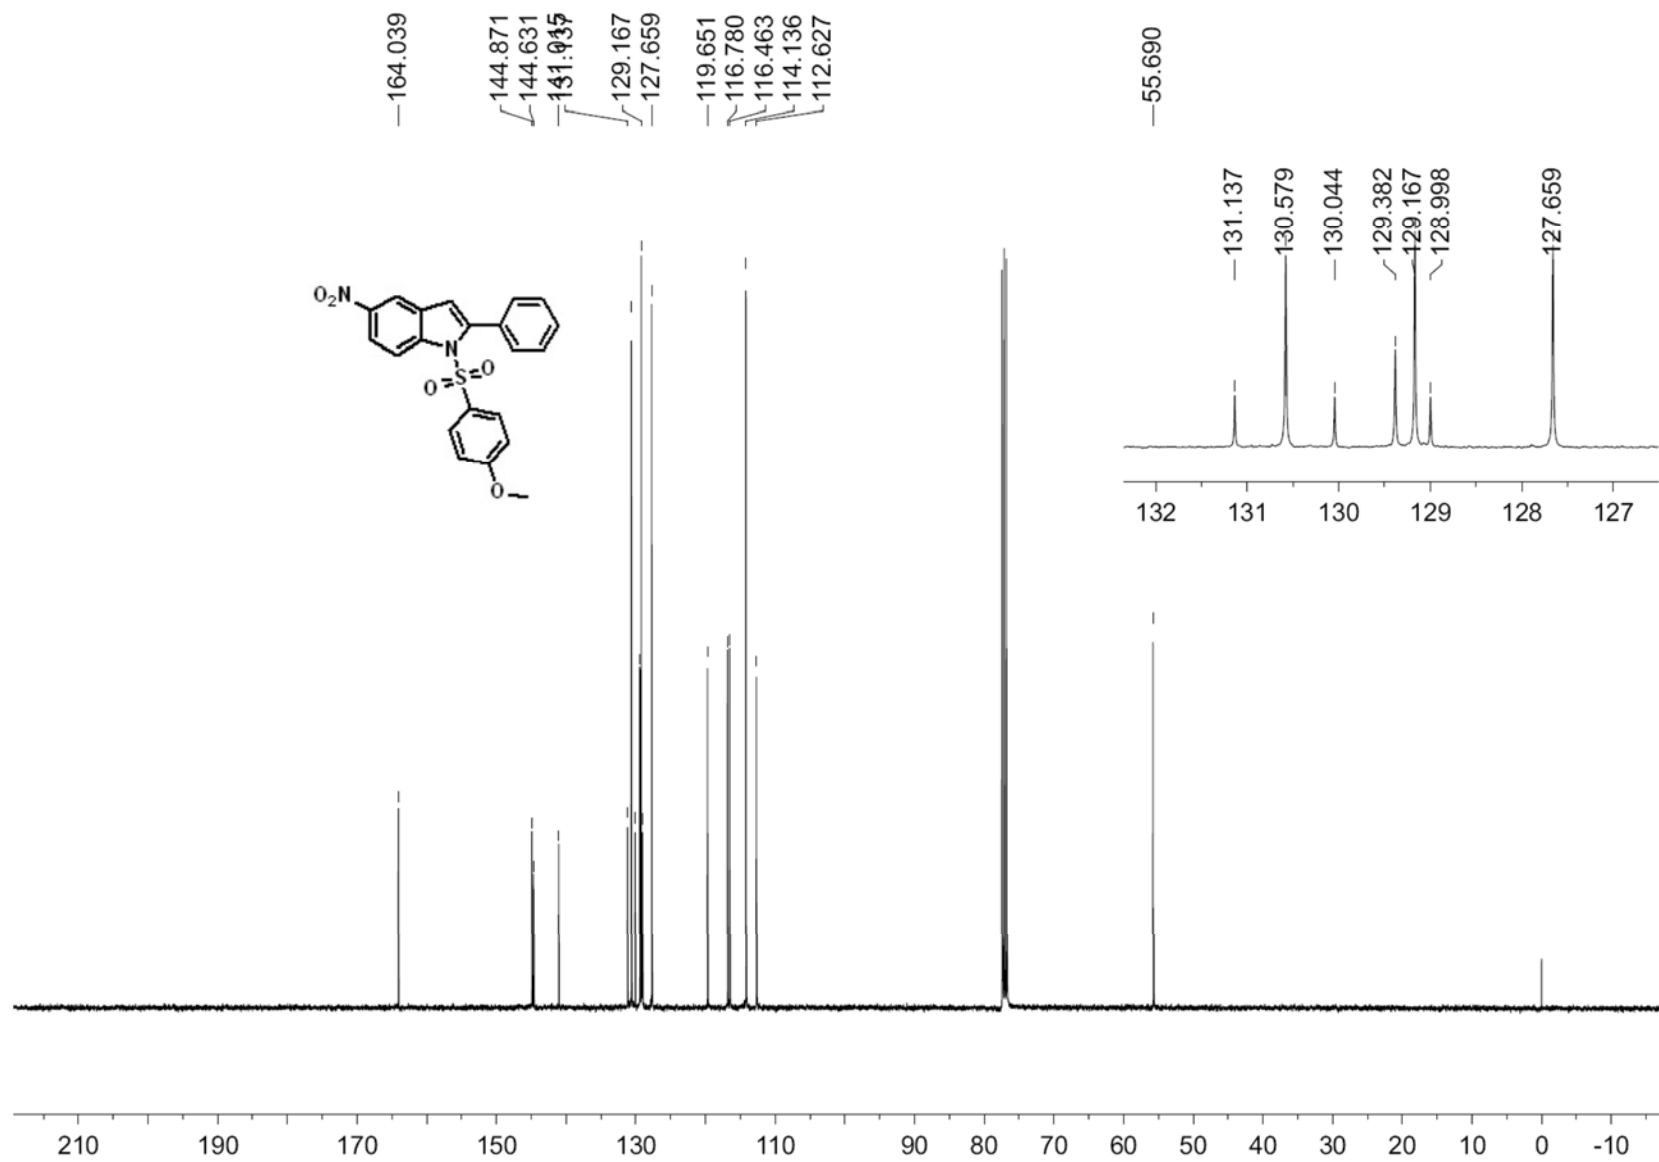

$^{13}\text{C}$  NMR Spectrum of Compound **2h**

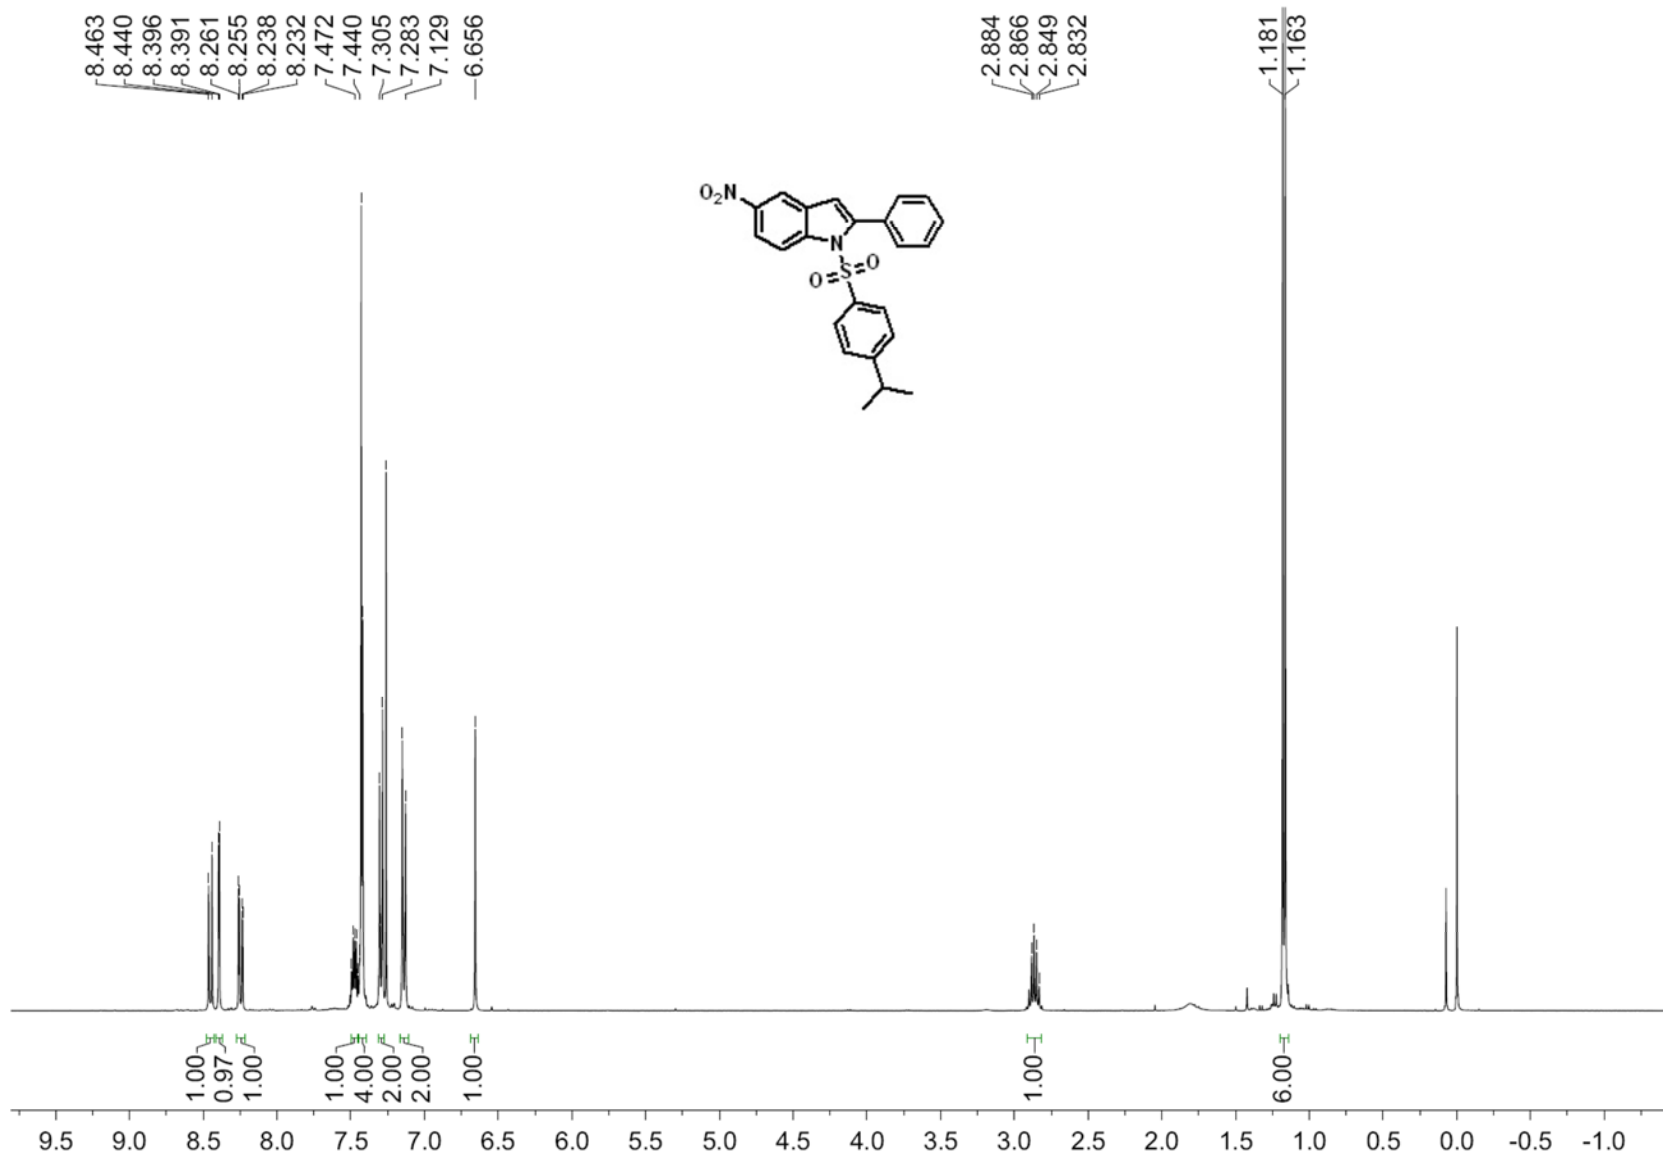

<sup>1</sup>H NMR Spectrum of Compound 2i

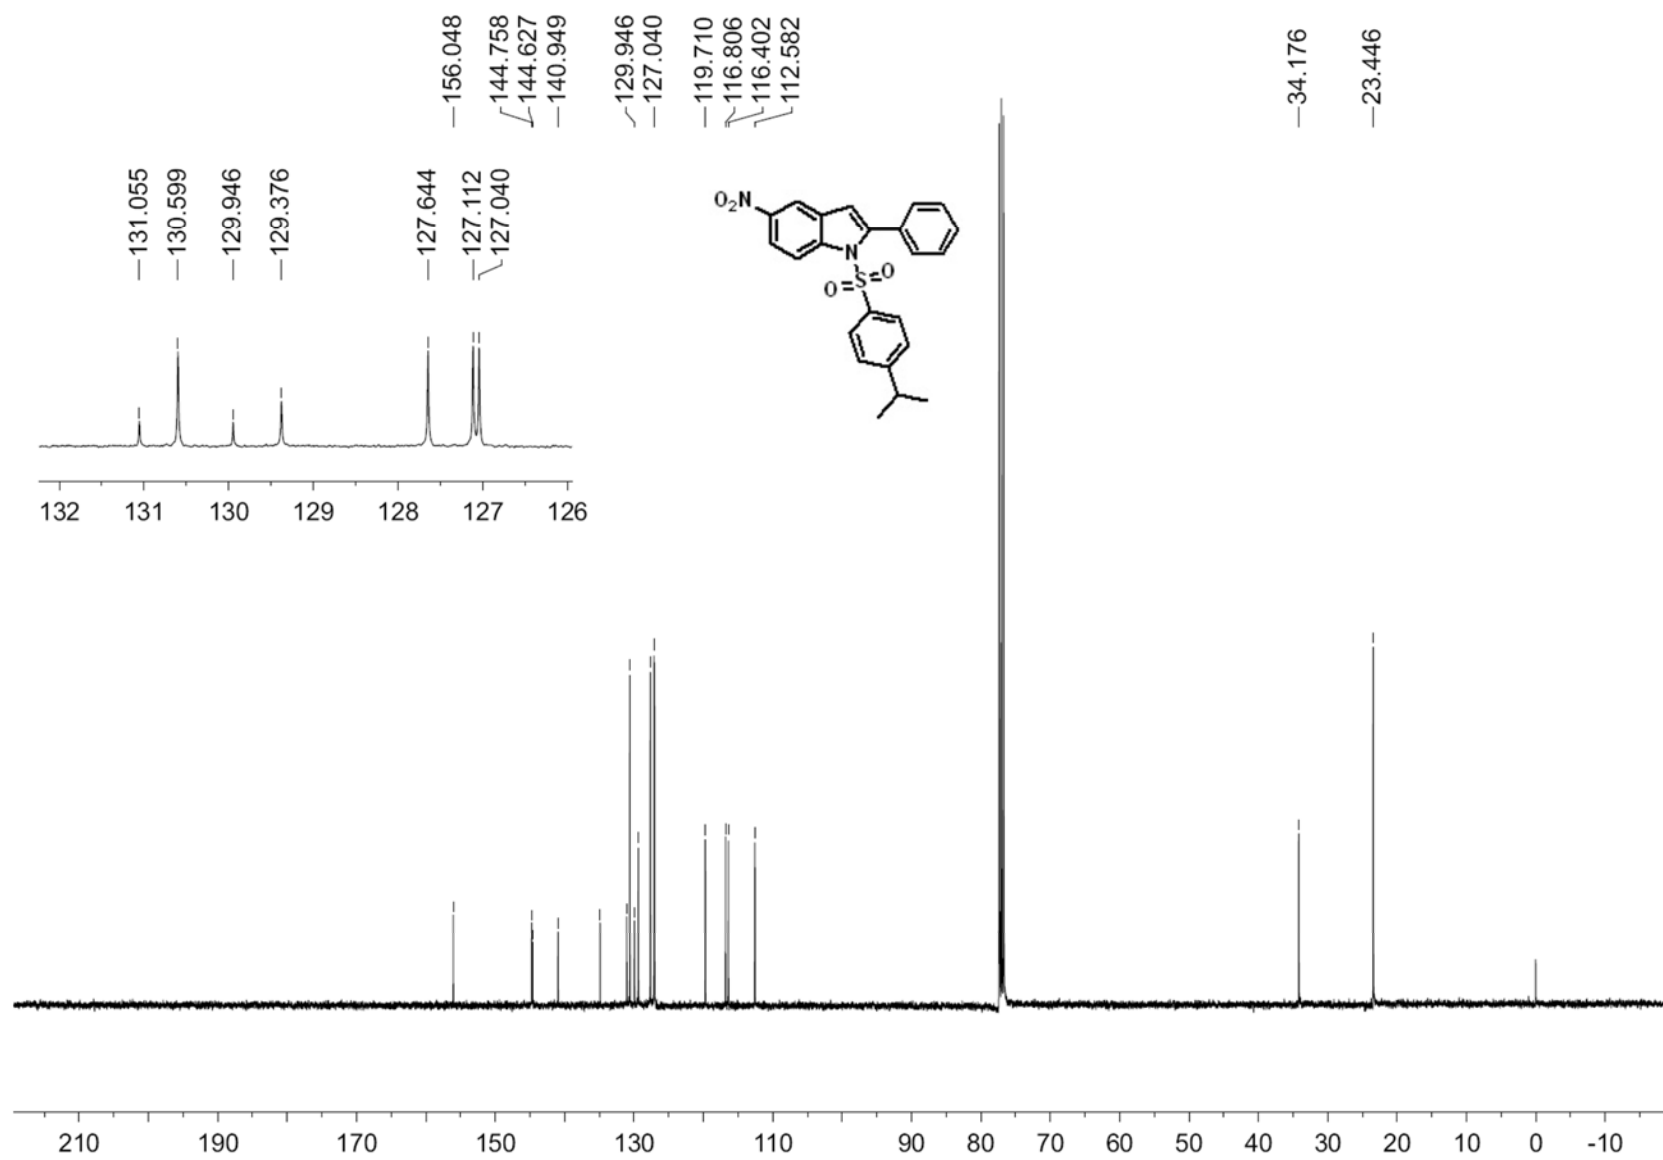

<sup>13</sup>C NMR Spectrum of Compound 2i

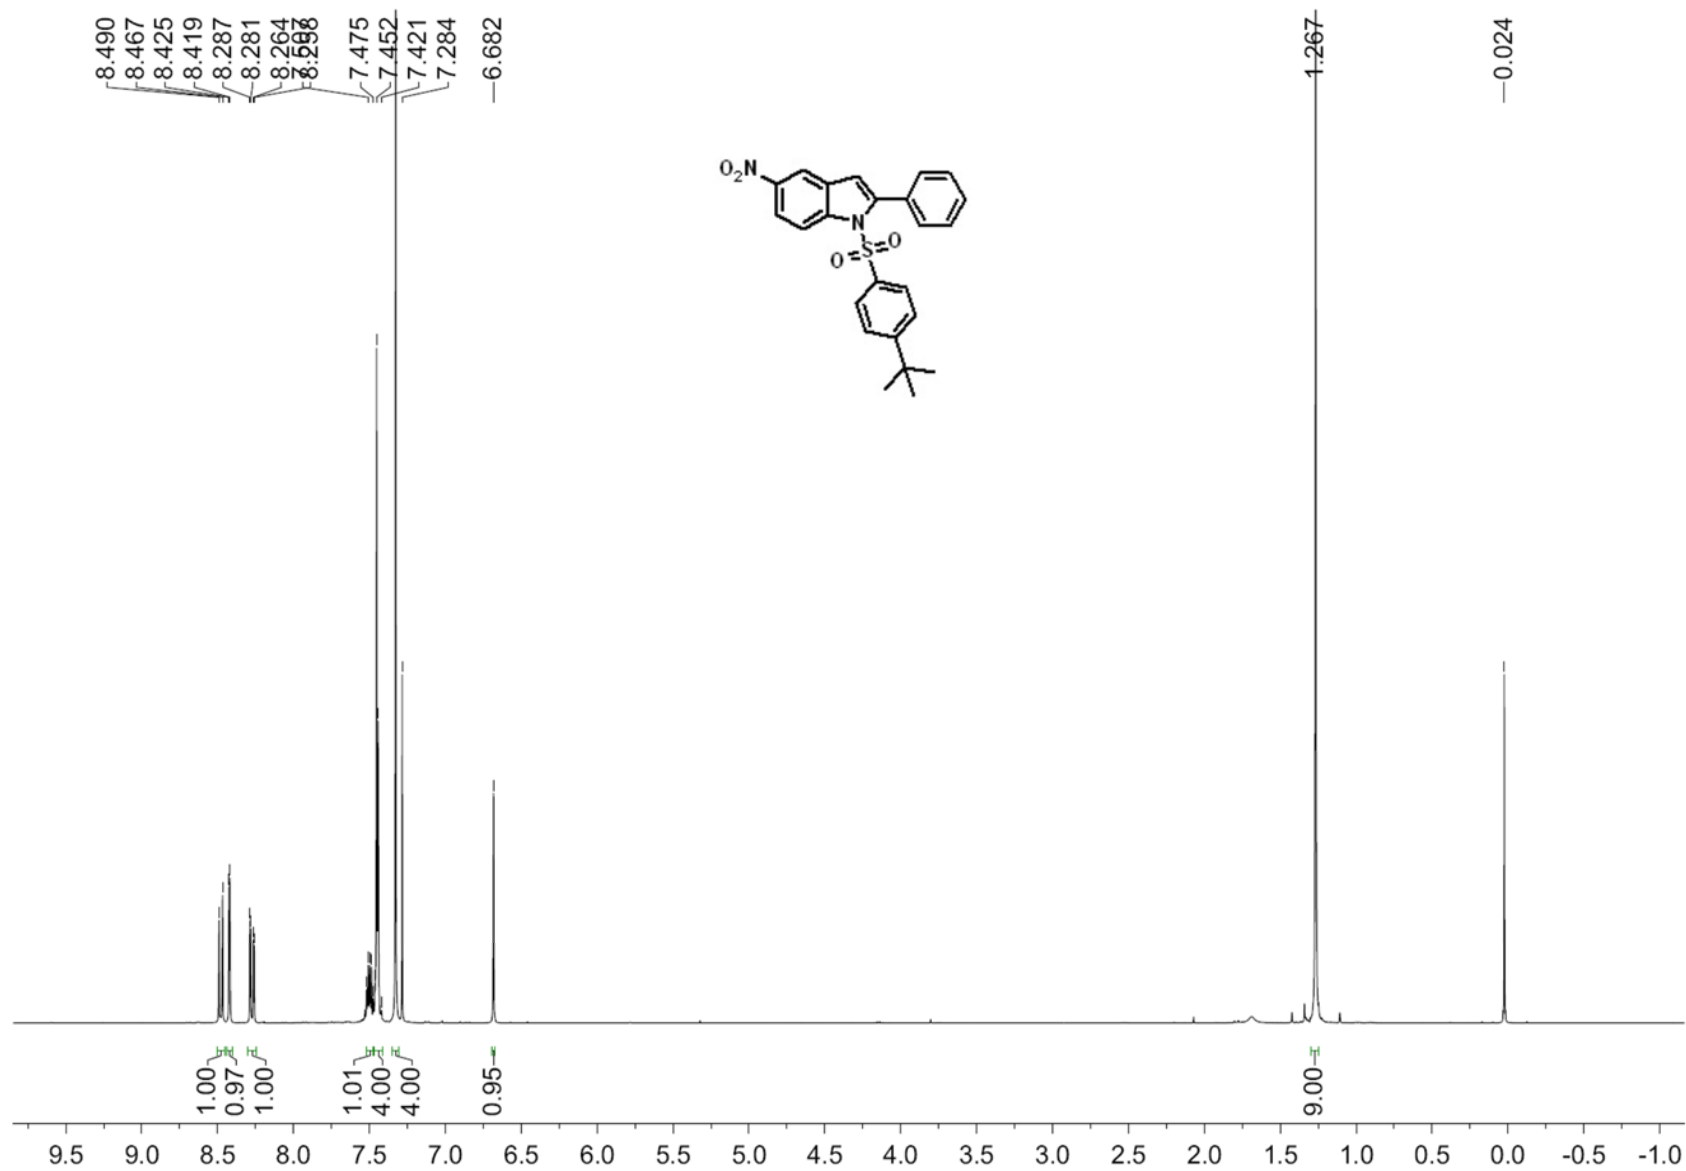

<sup>1</sup>H NMR Spectrum of Compound 2j

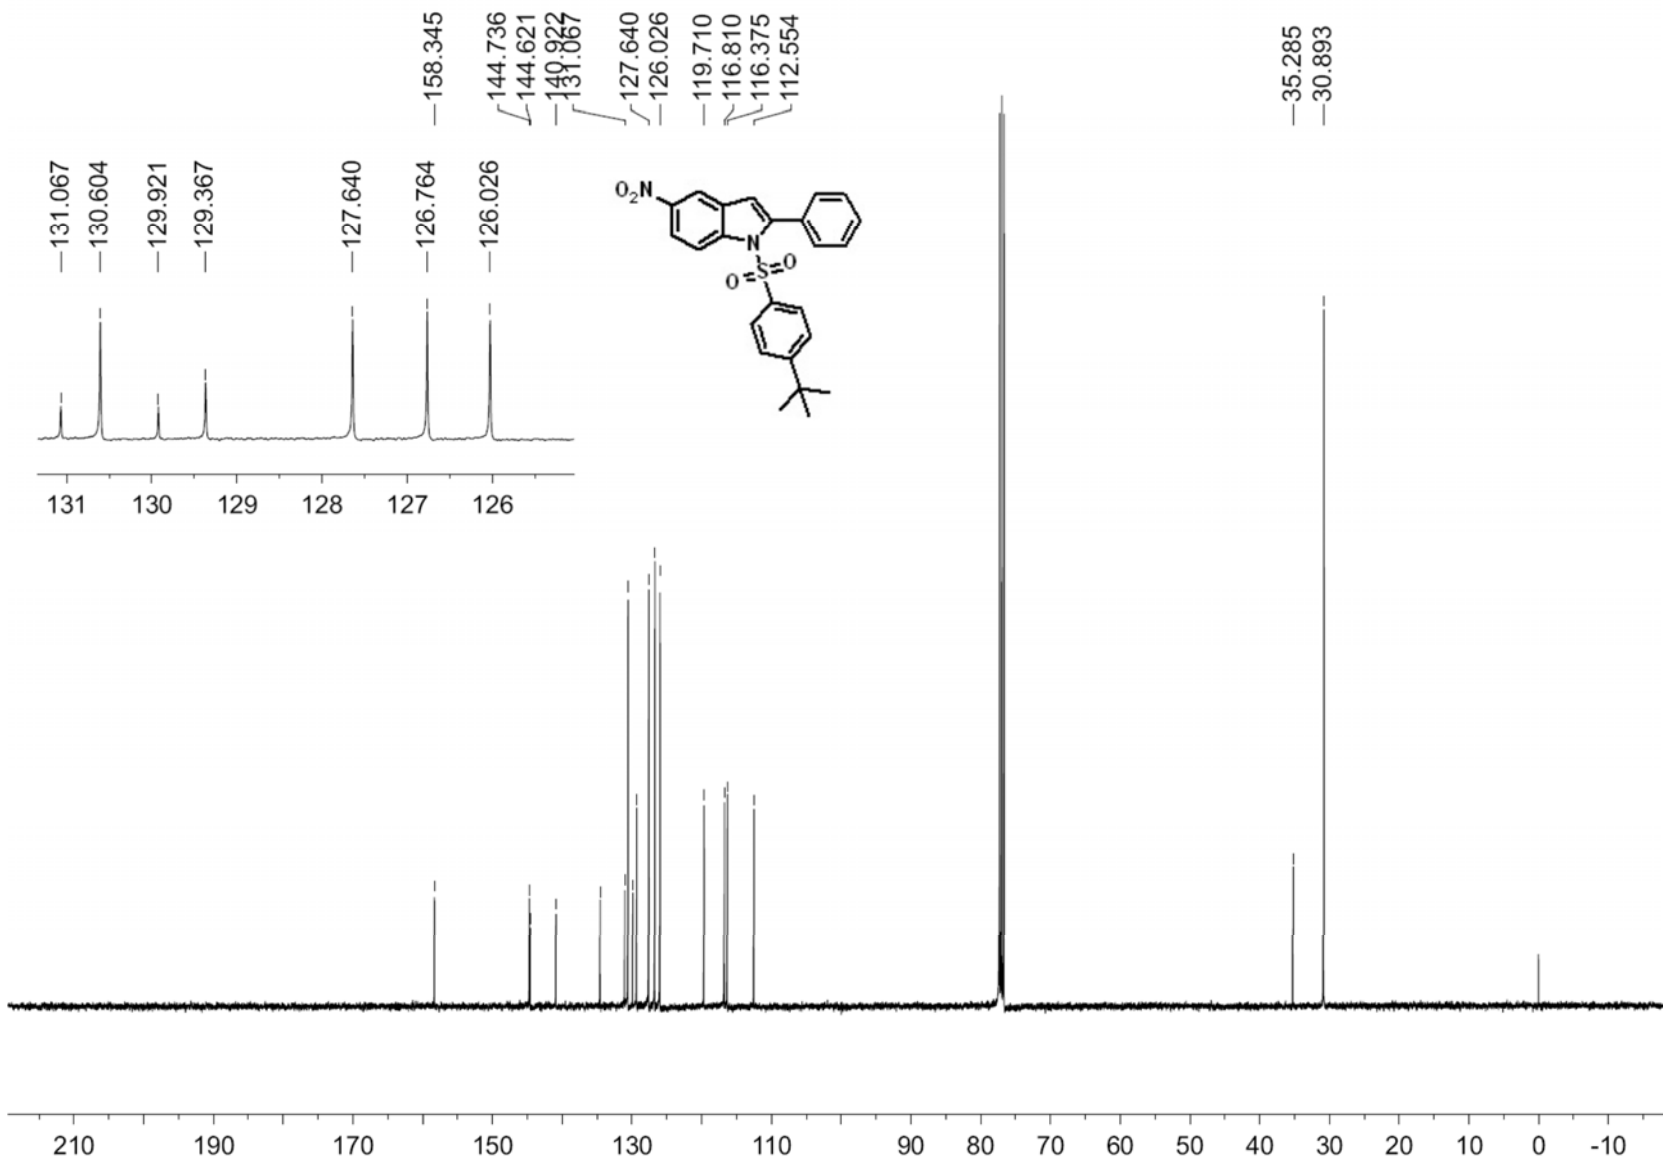

<sup>13</sup>C NMR Spectrum of Compound 2j

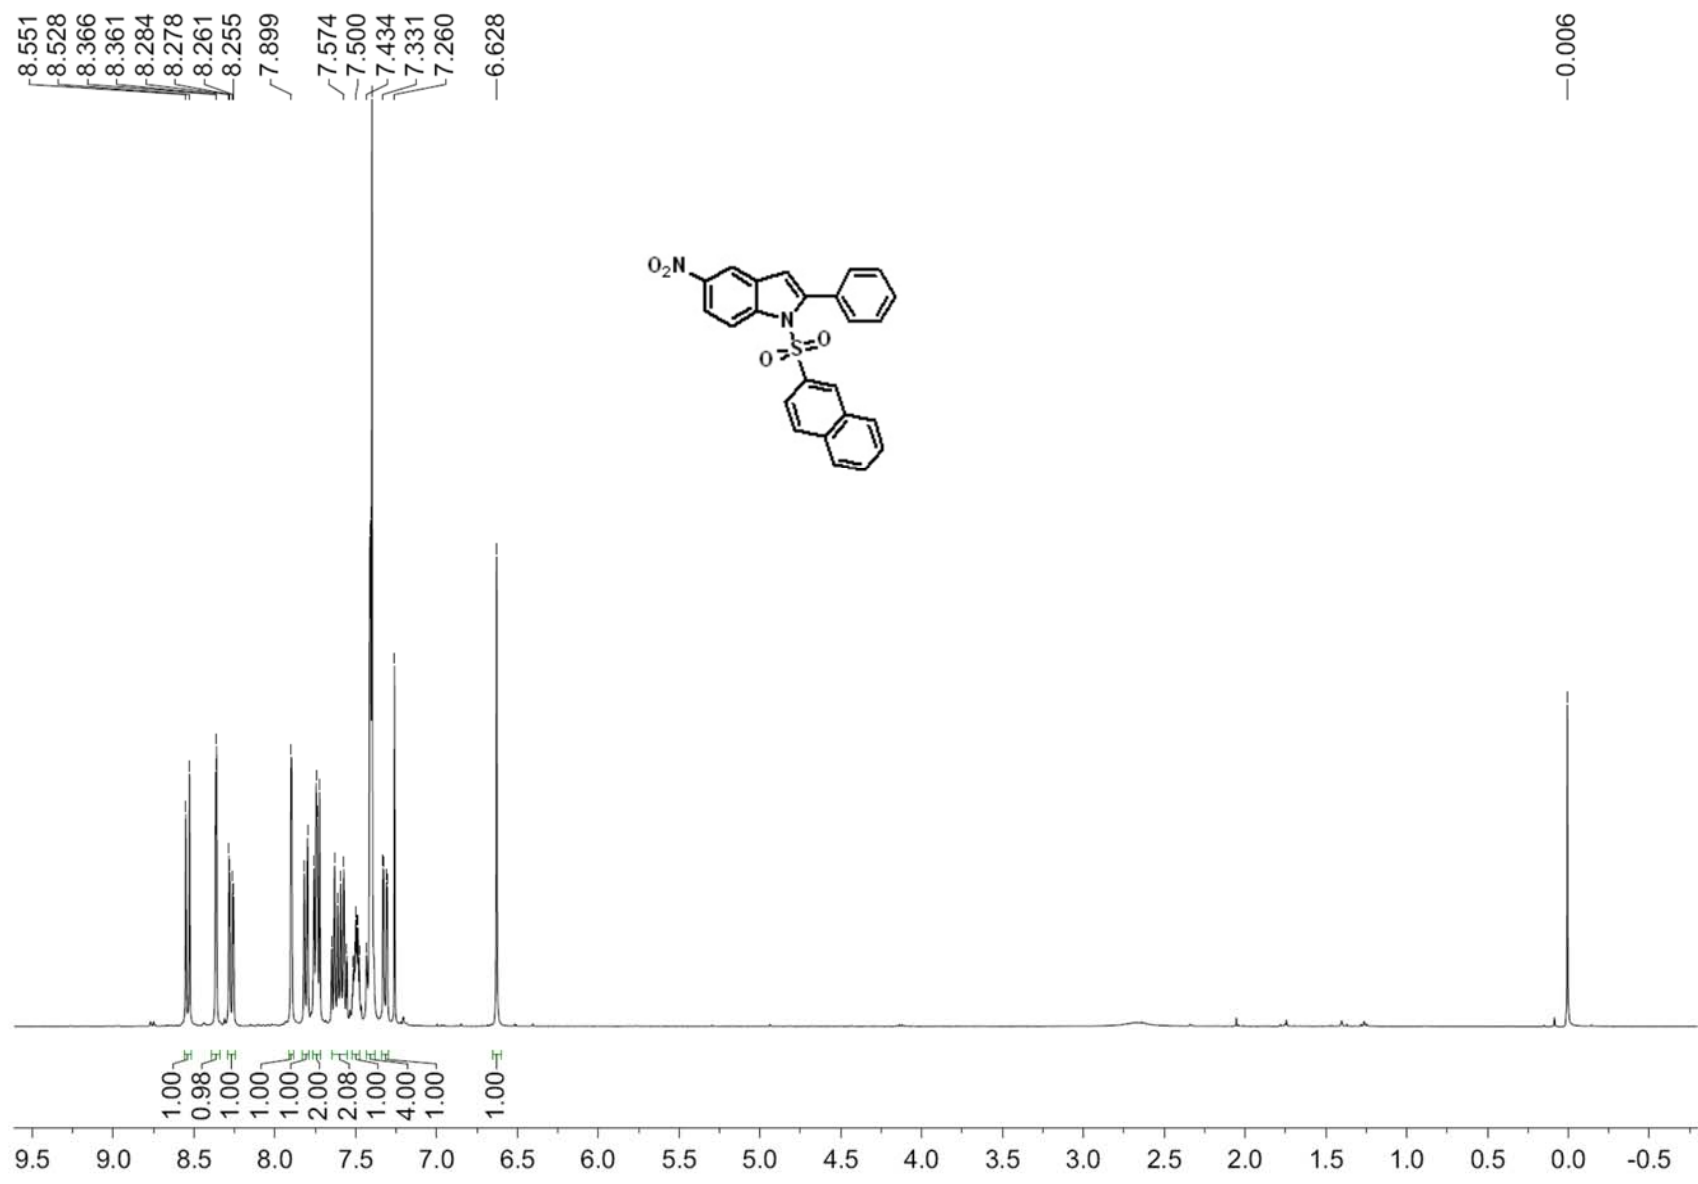

<sup>1</sup>H NMR Spectrum of Compound 2k

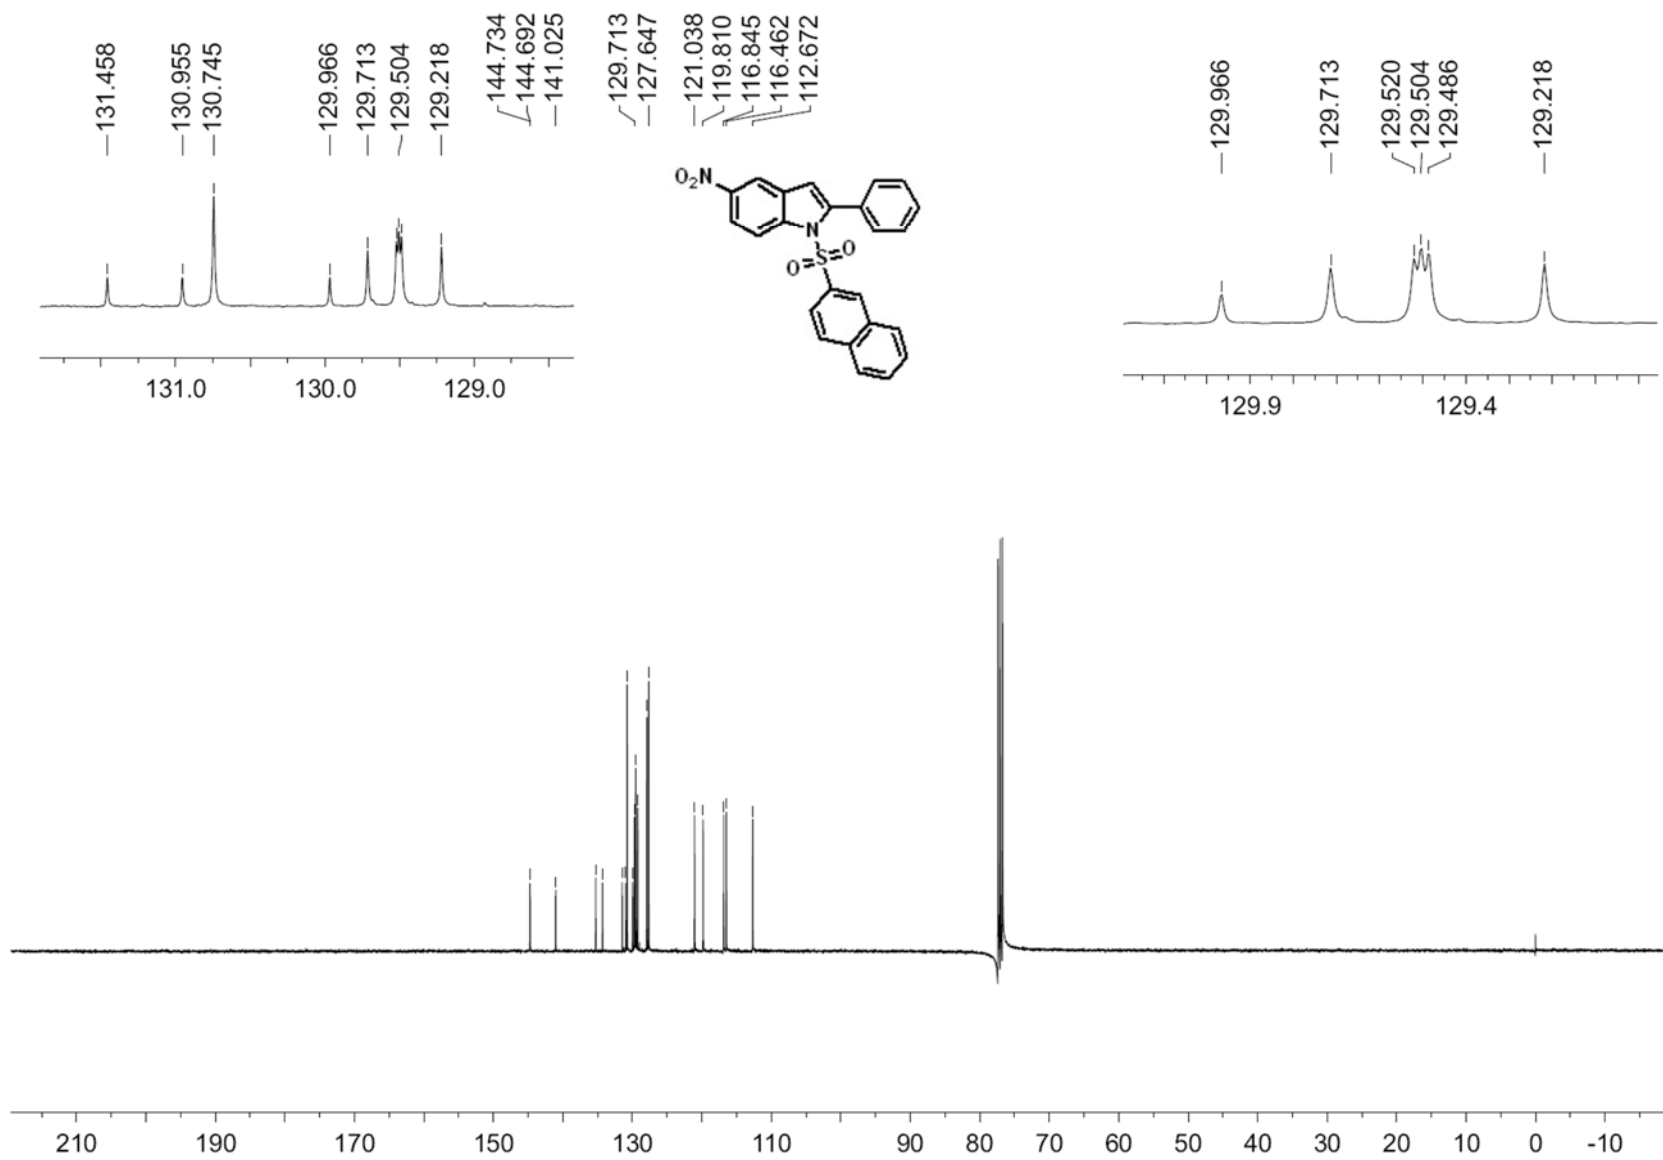

<sup>13</sup>C NMR Spectrum of Compound **2k**



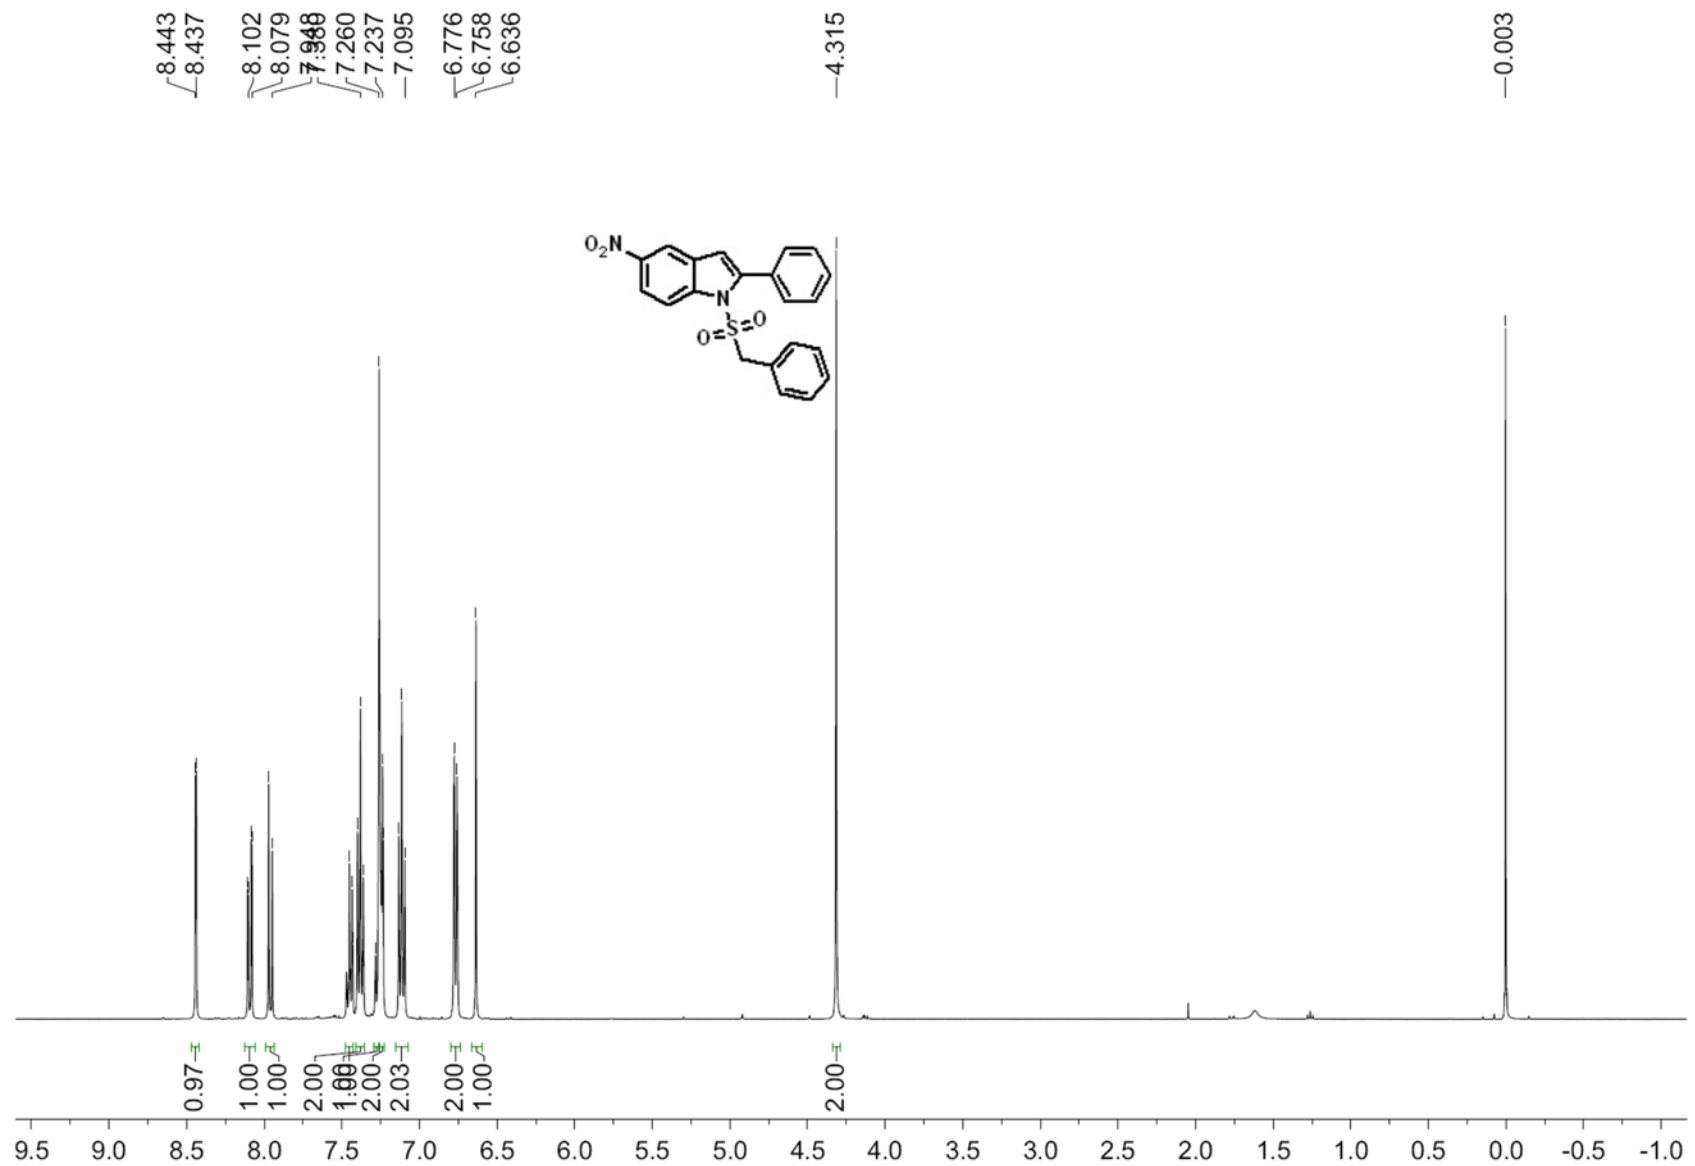

<sup>1</sup>H NMR Spectrum of Compound 21

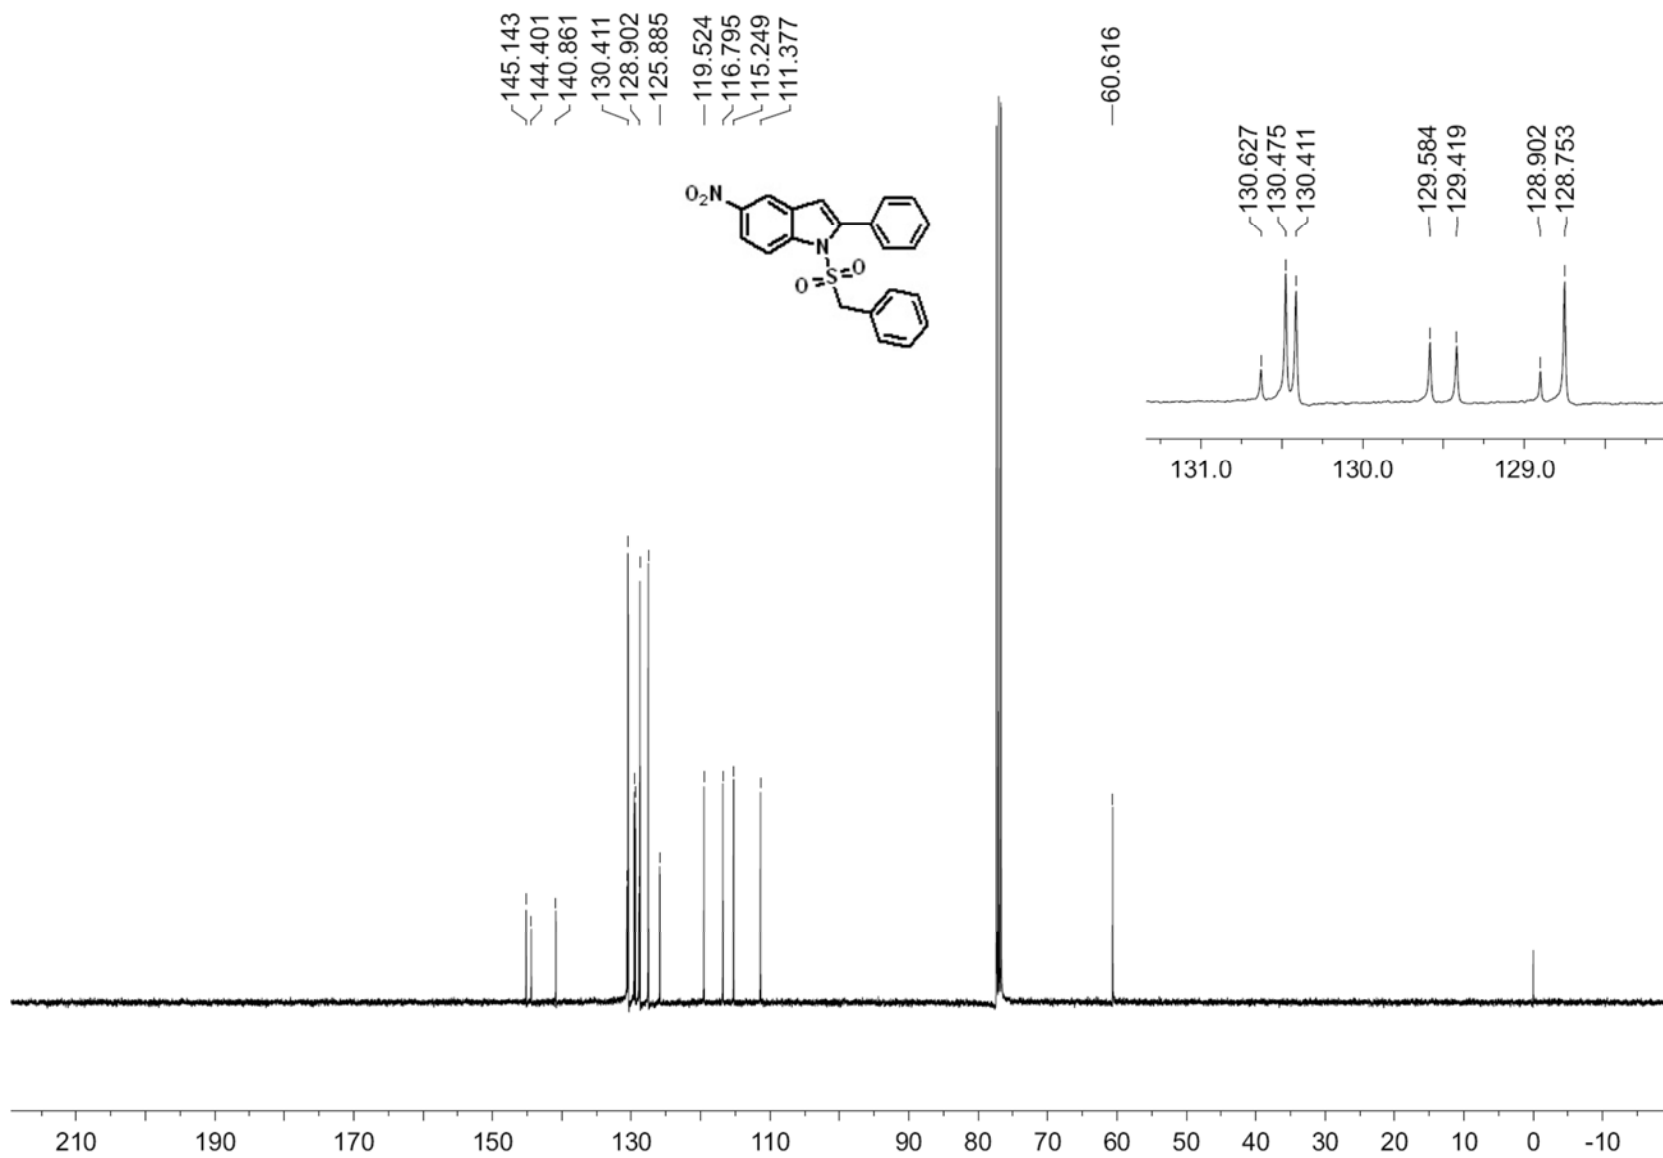

<sup>13</sup>C NMR Spectrum of Compound 2I

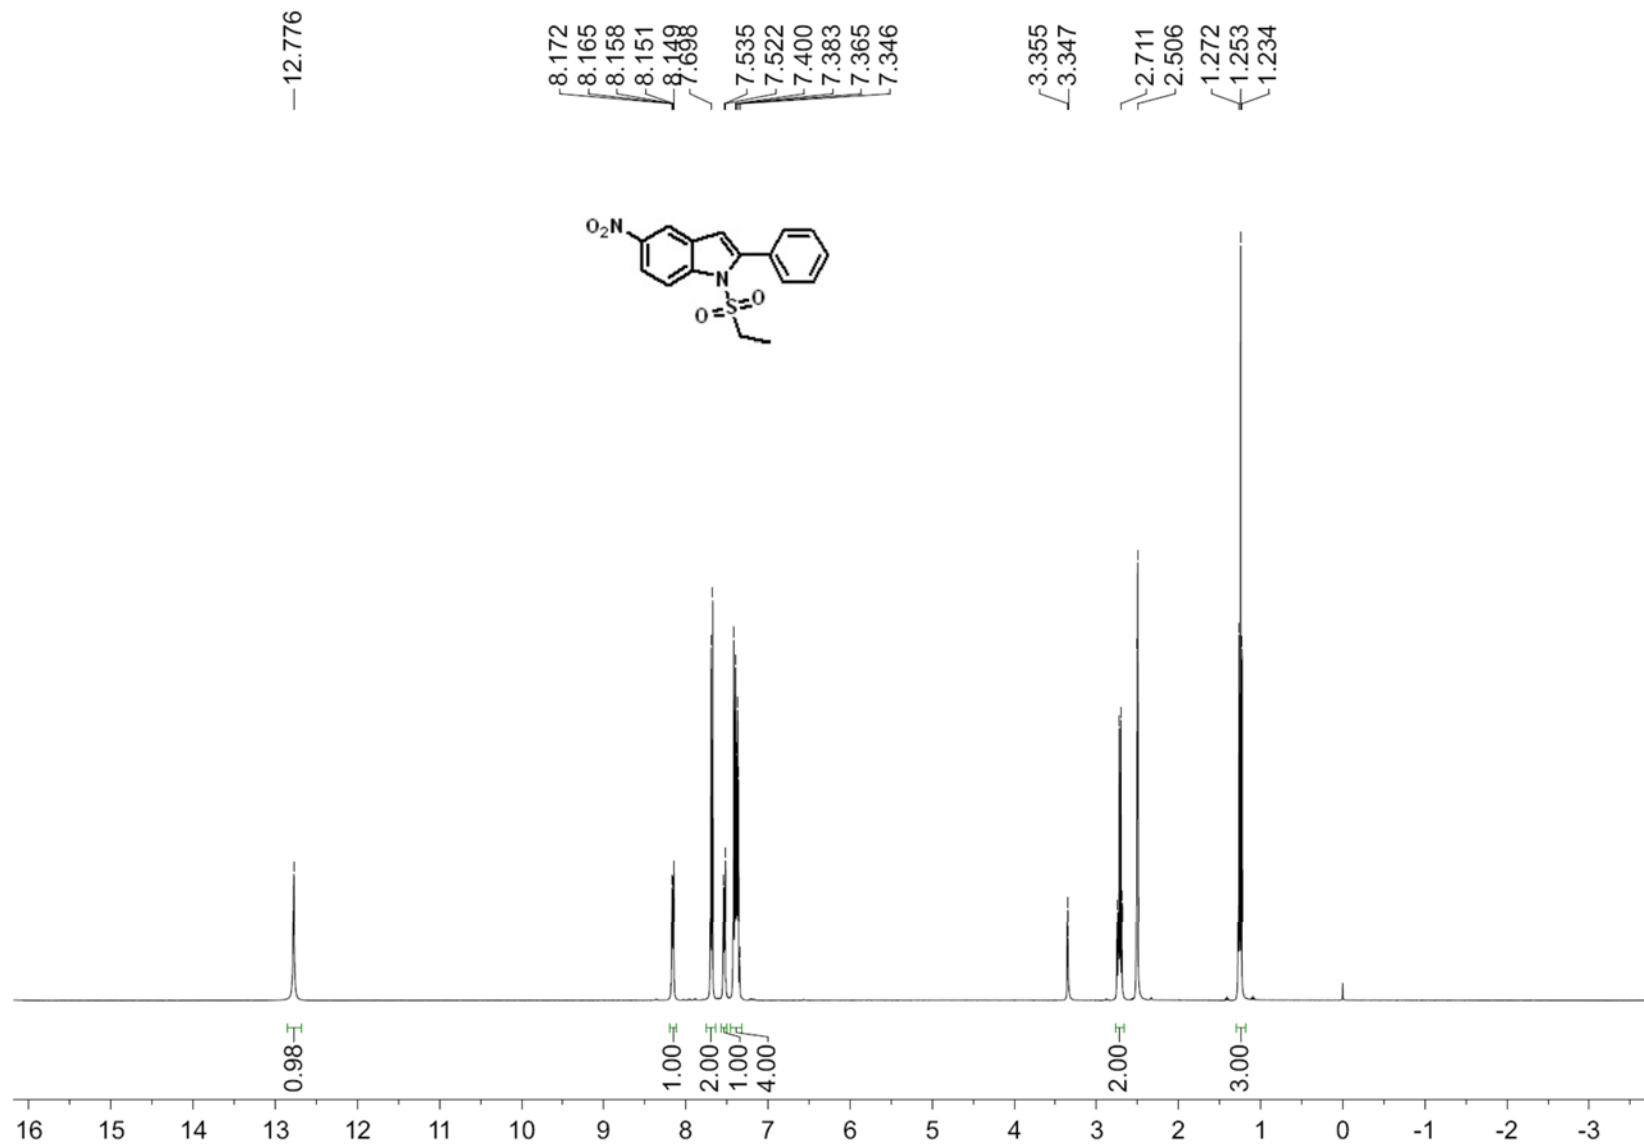

<sup>1</sup>H NMR Spectrum of Compound **2m**

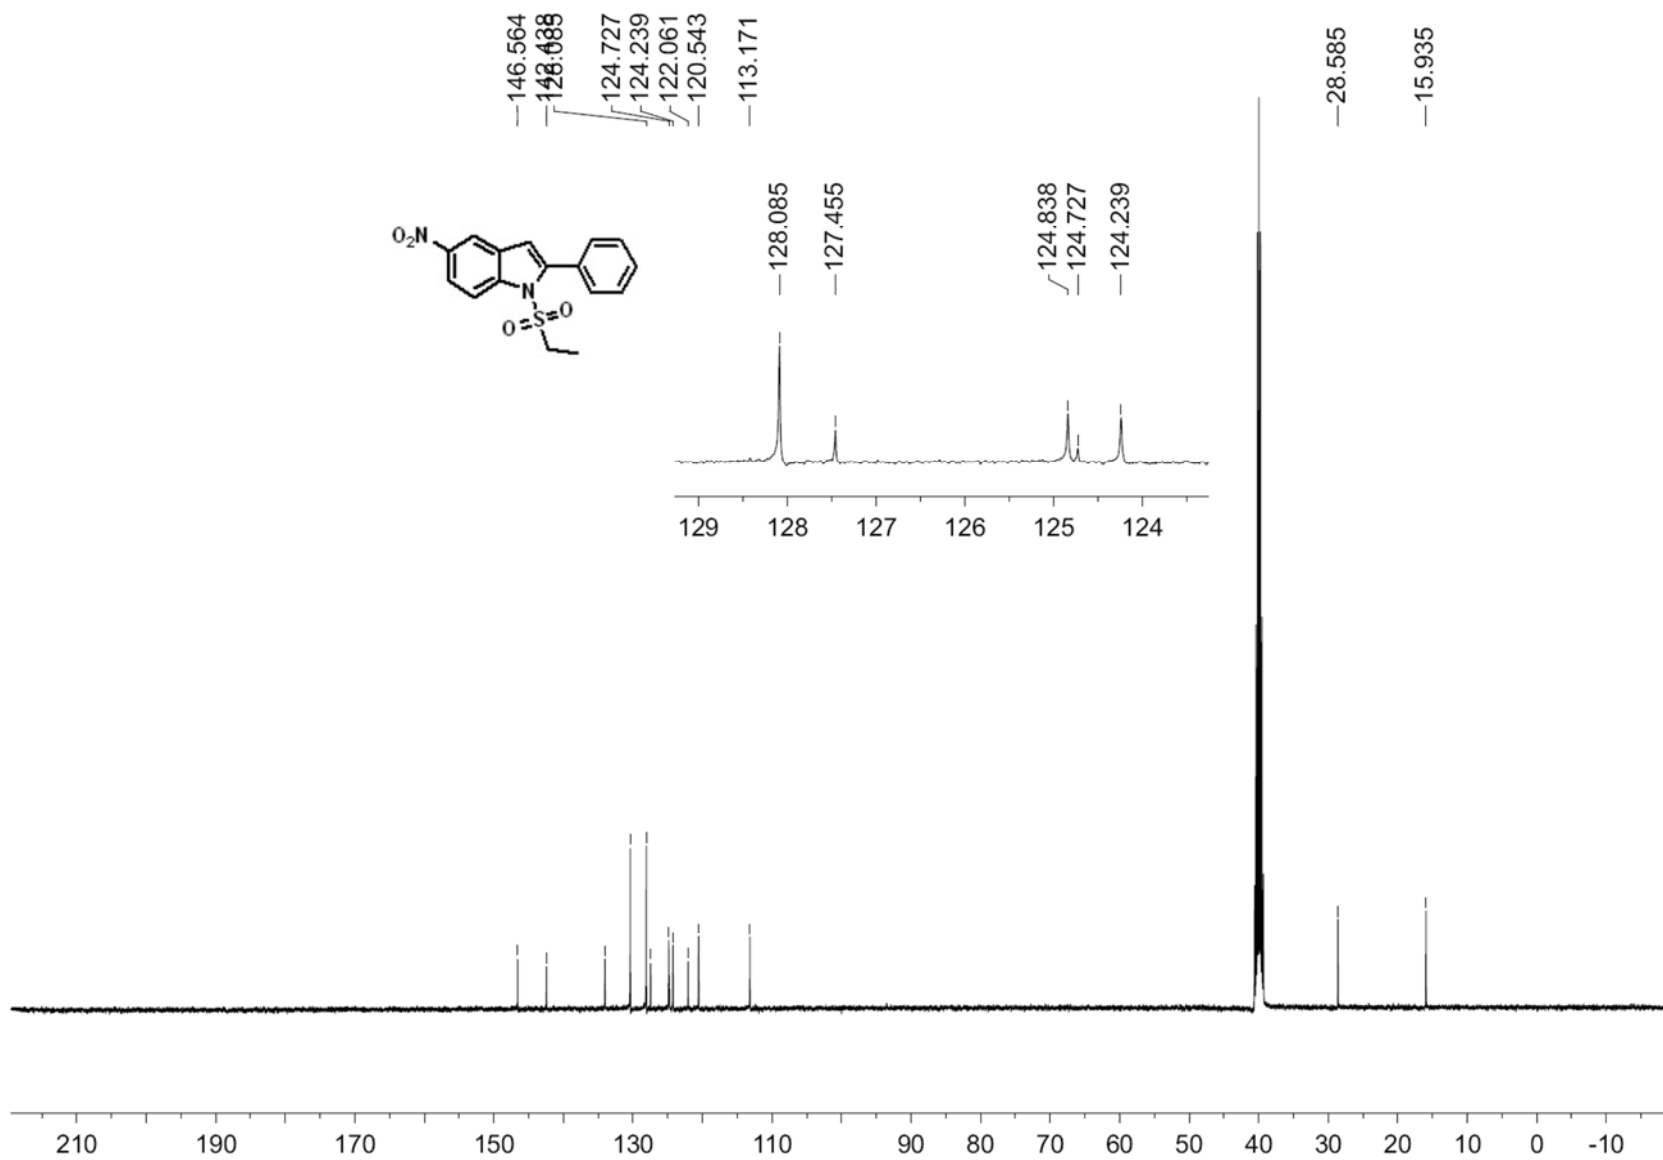

<sup>13</sup>C NMR Spectrum of Compound **2m**

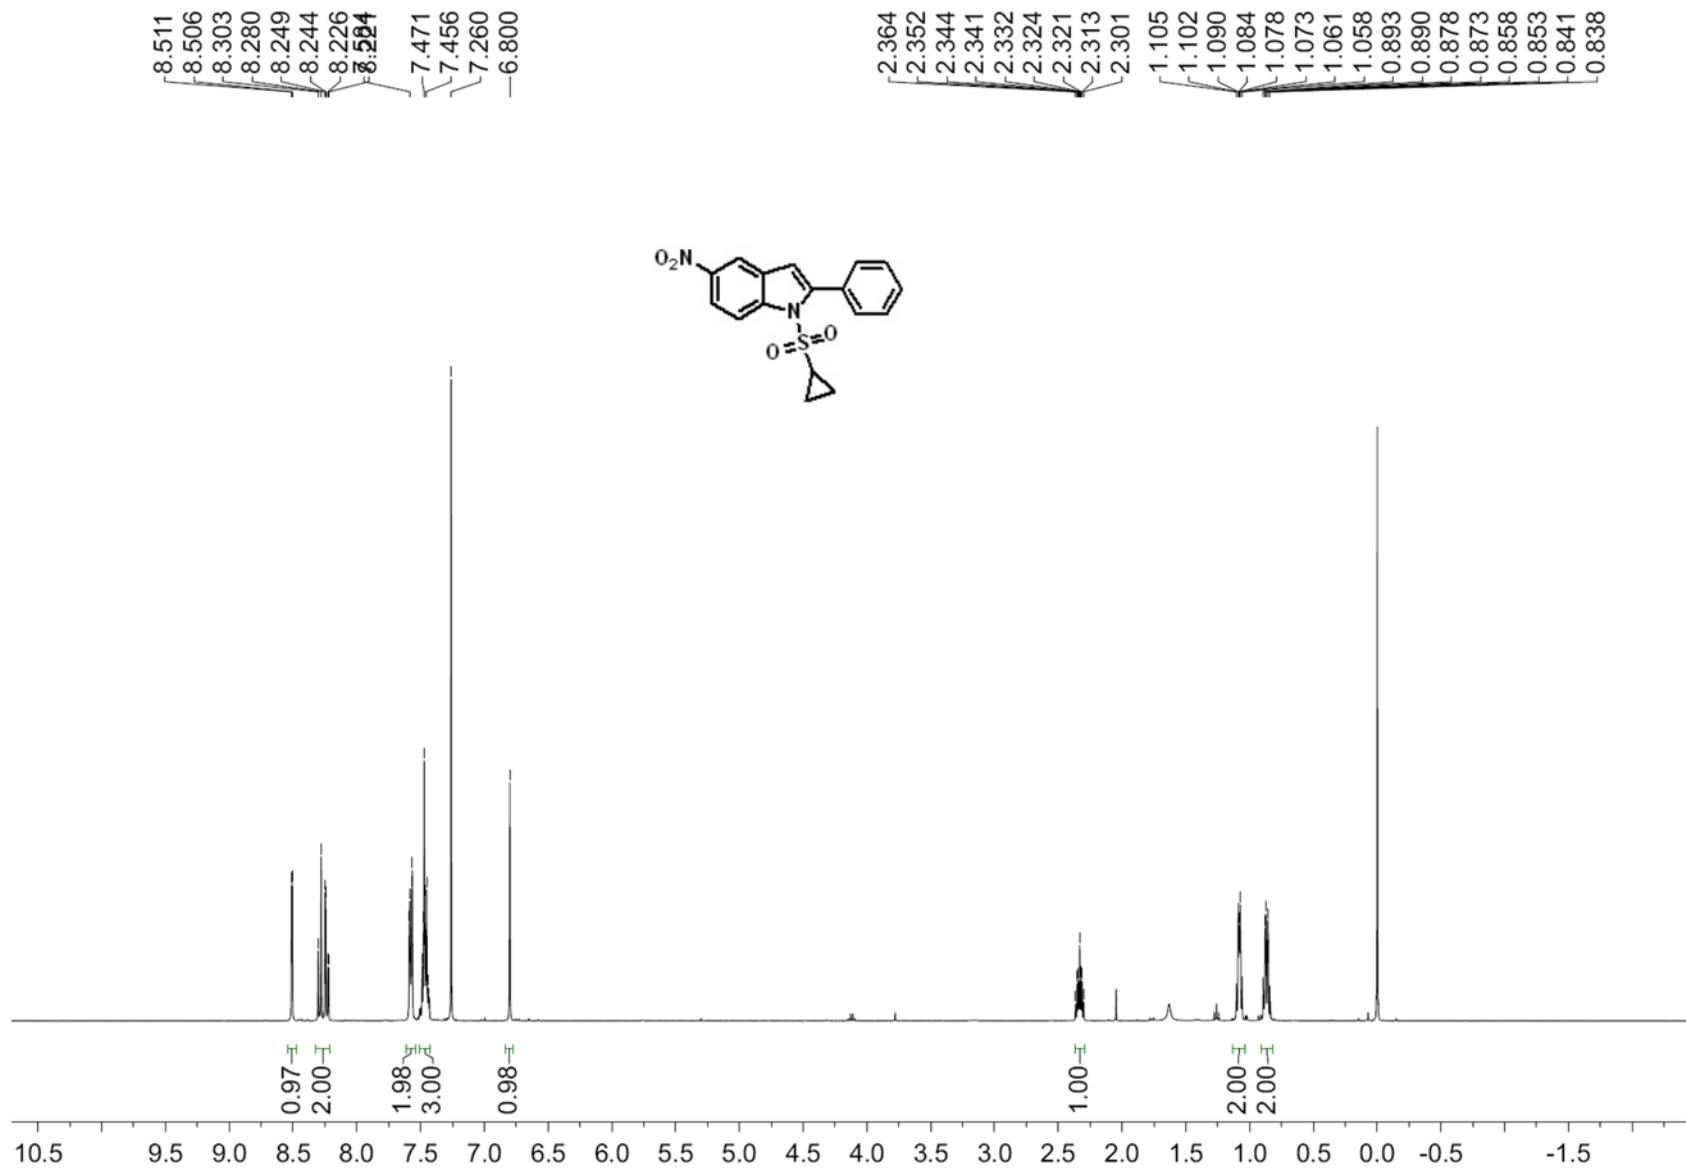

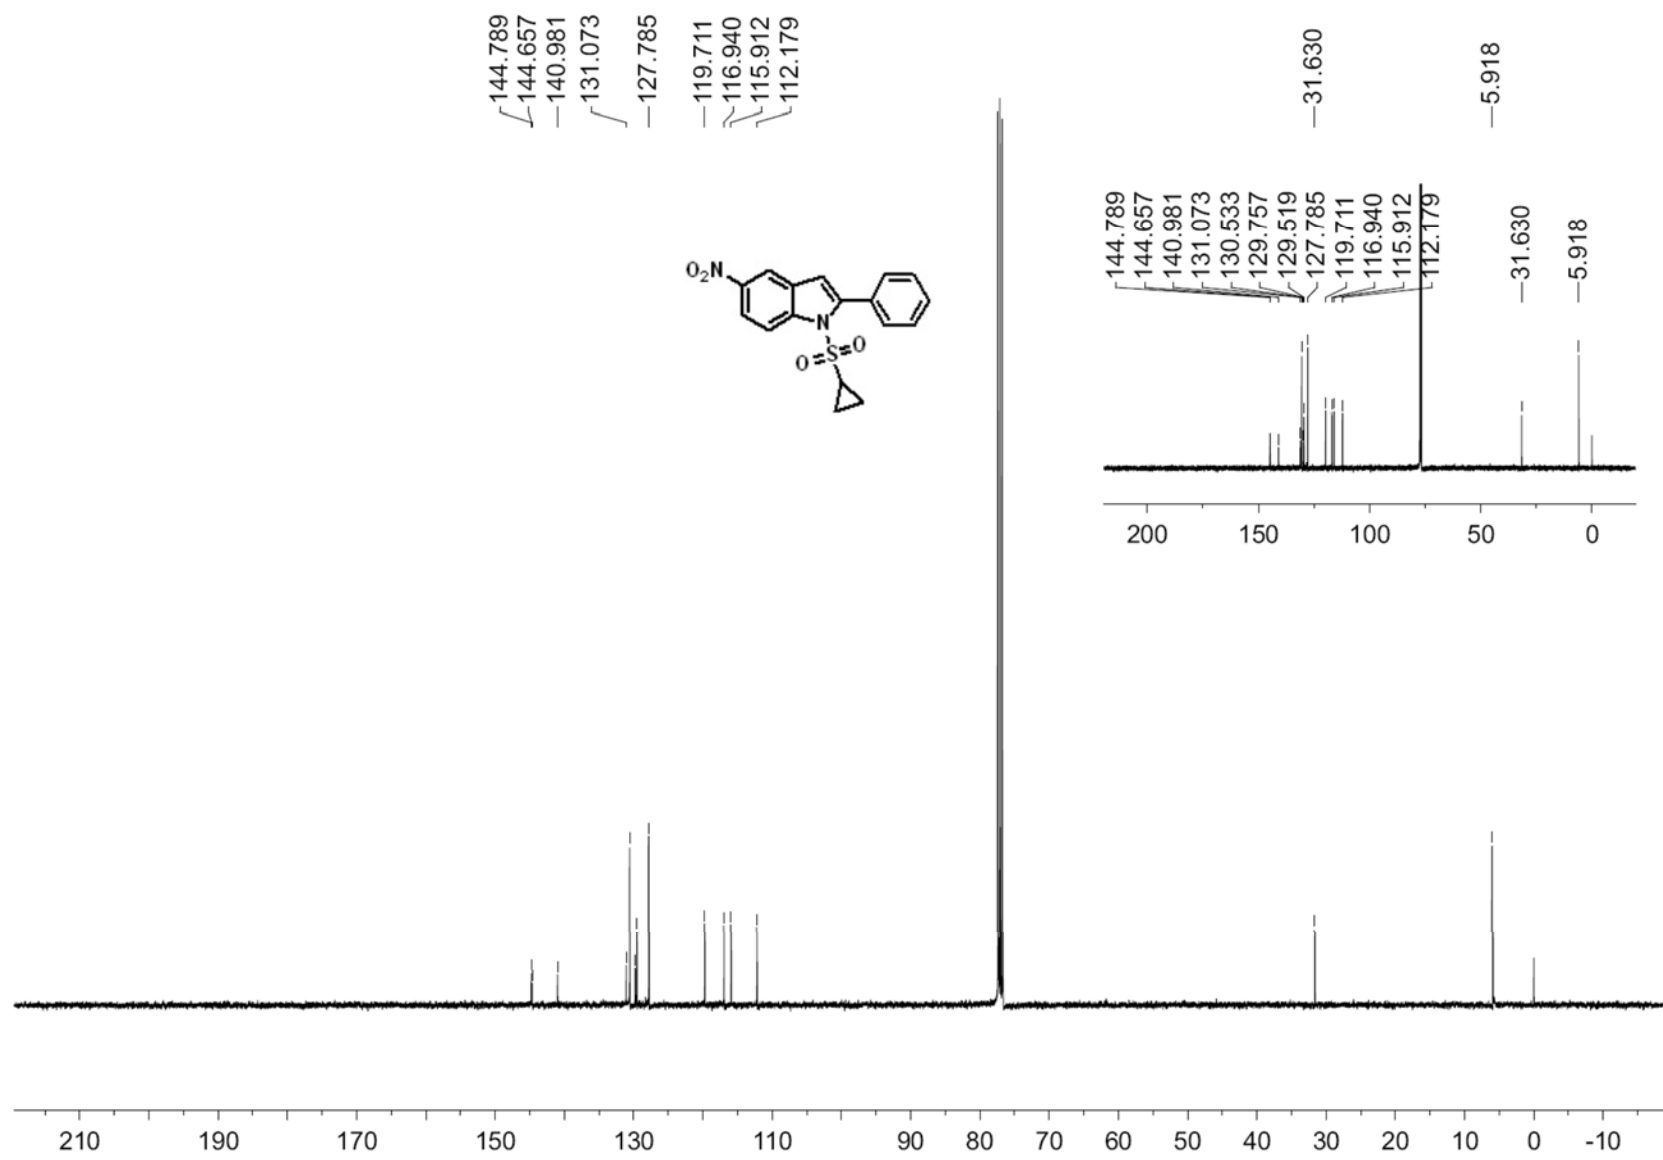

$^{13}\text{C}$  NMR Spectrum of Compound **2n**

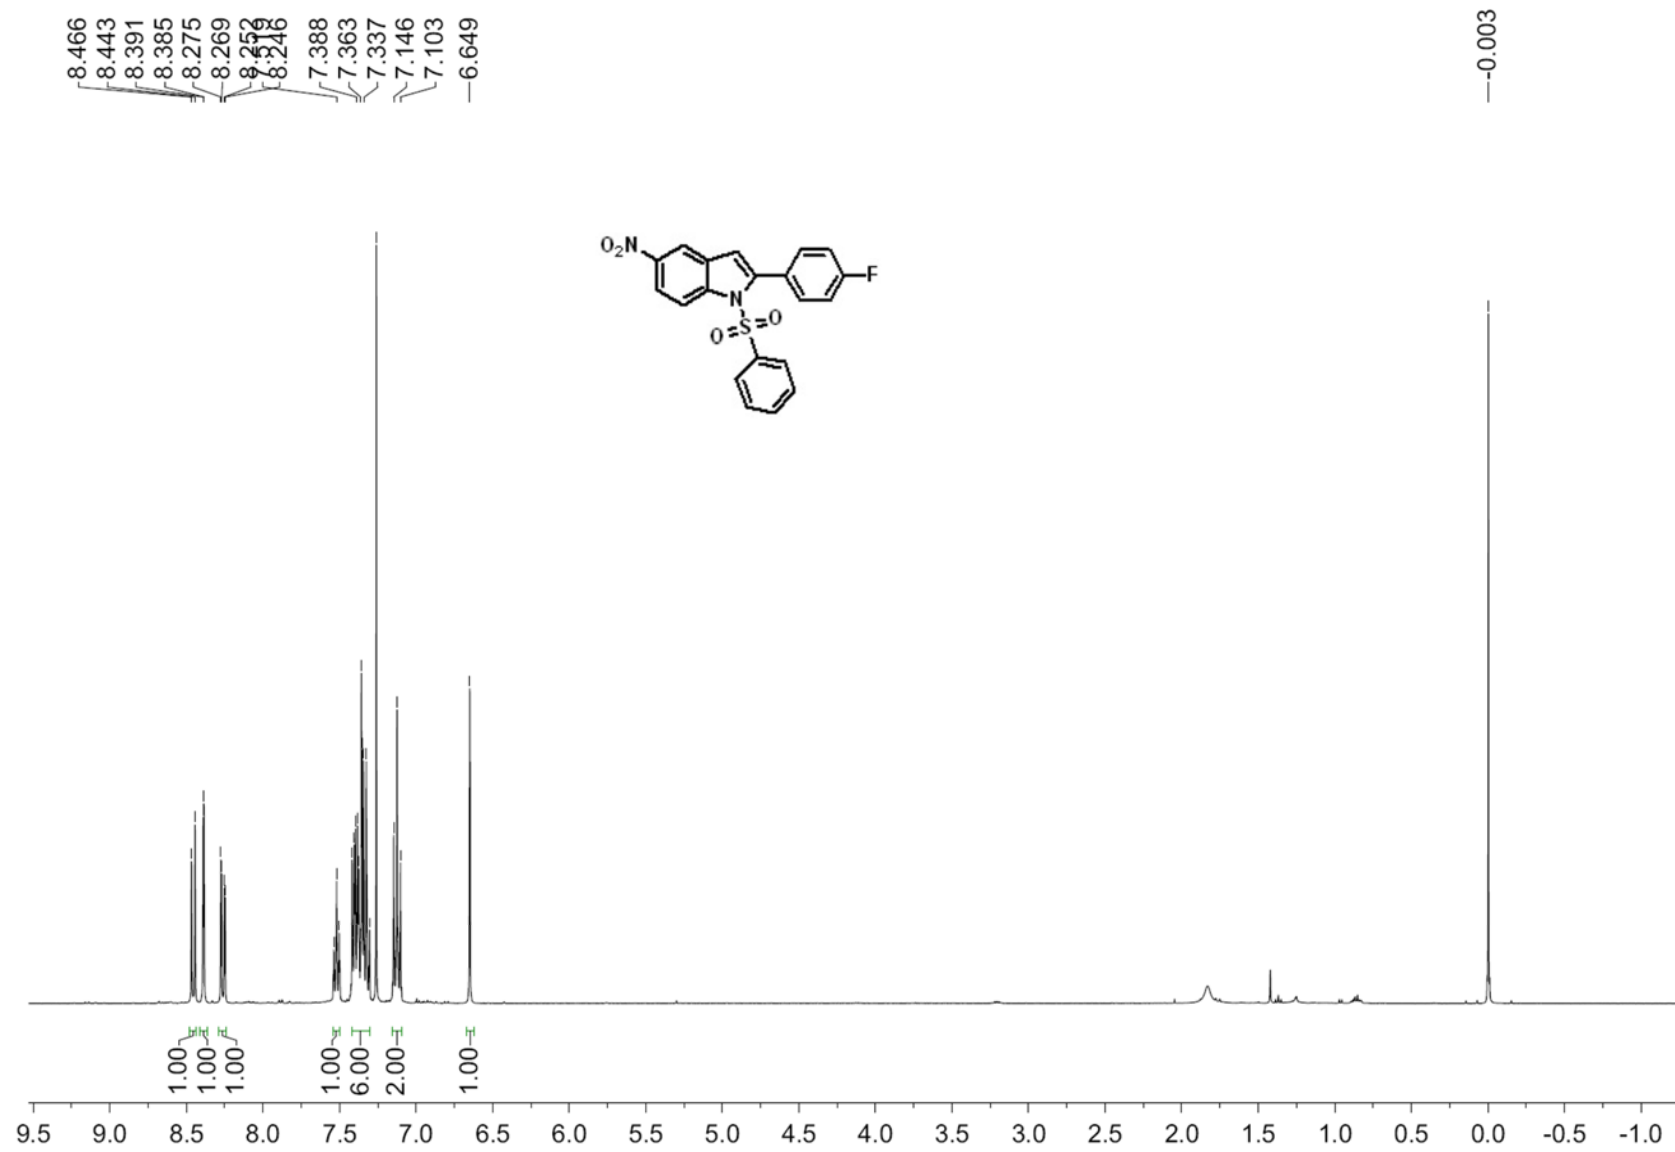

<sup>1</sup>H NMR Spectrum of Compound **2o**

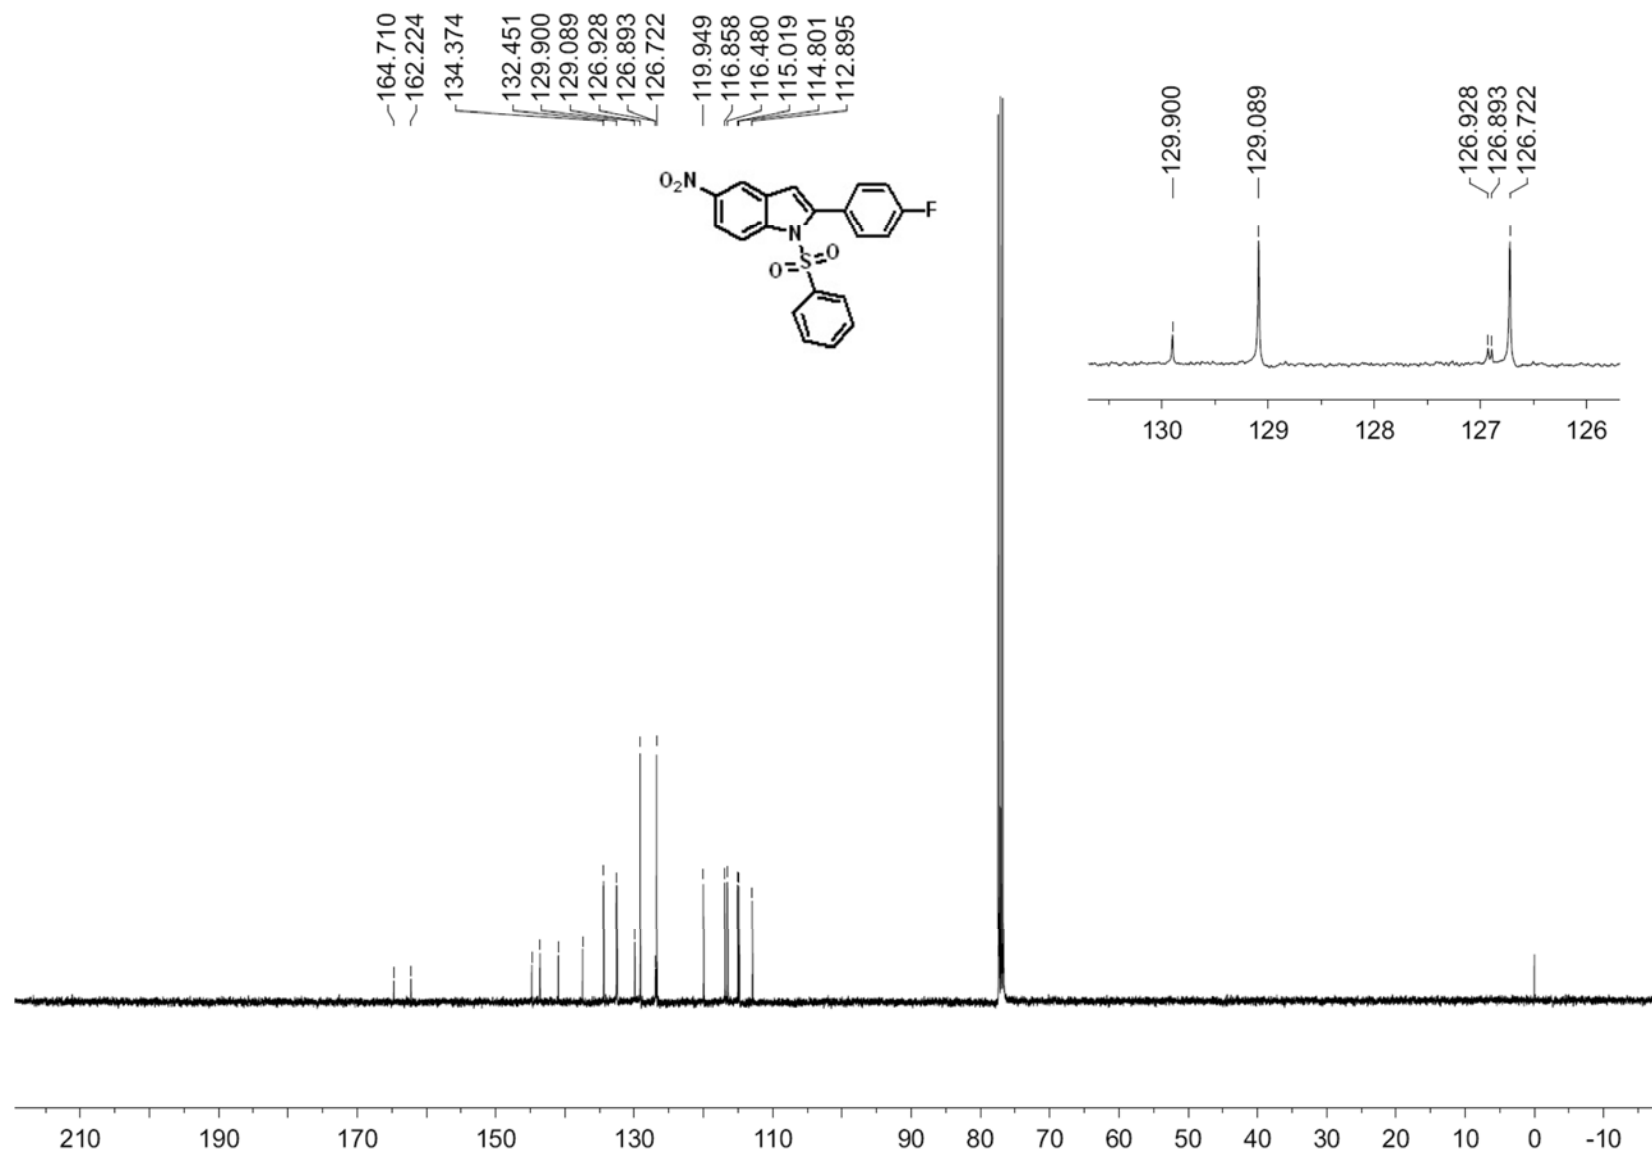

<sup>13</sup>C NMR Spectrum of Compound **2o**



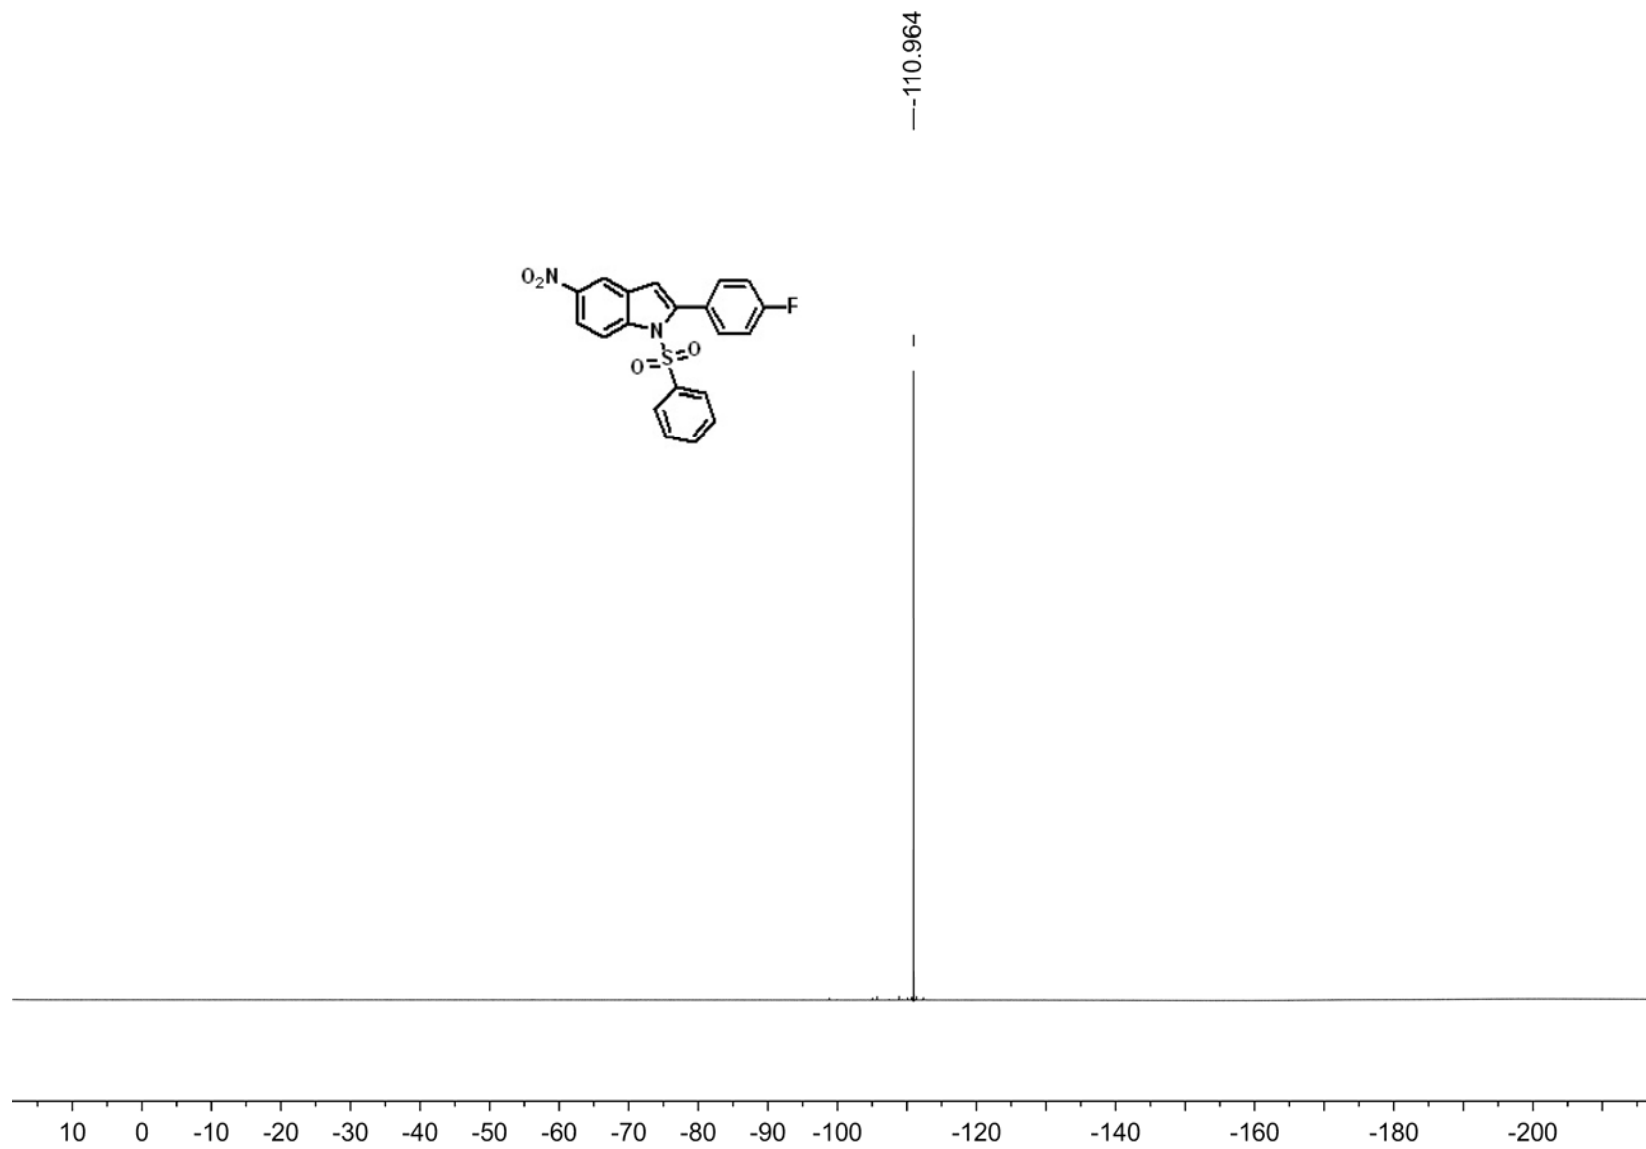

$^{19}\text{F}$  NMR Spectrum of Compound **2o**

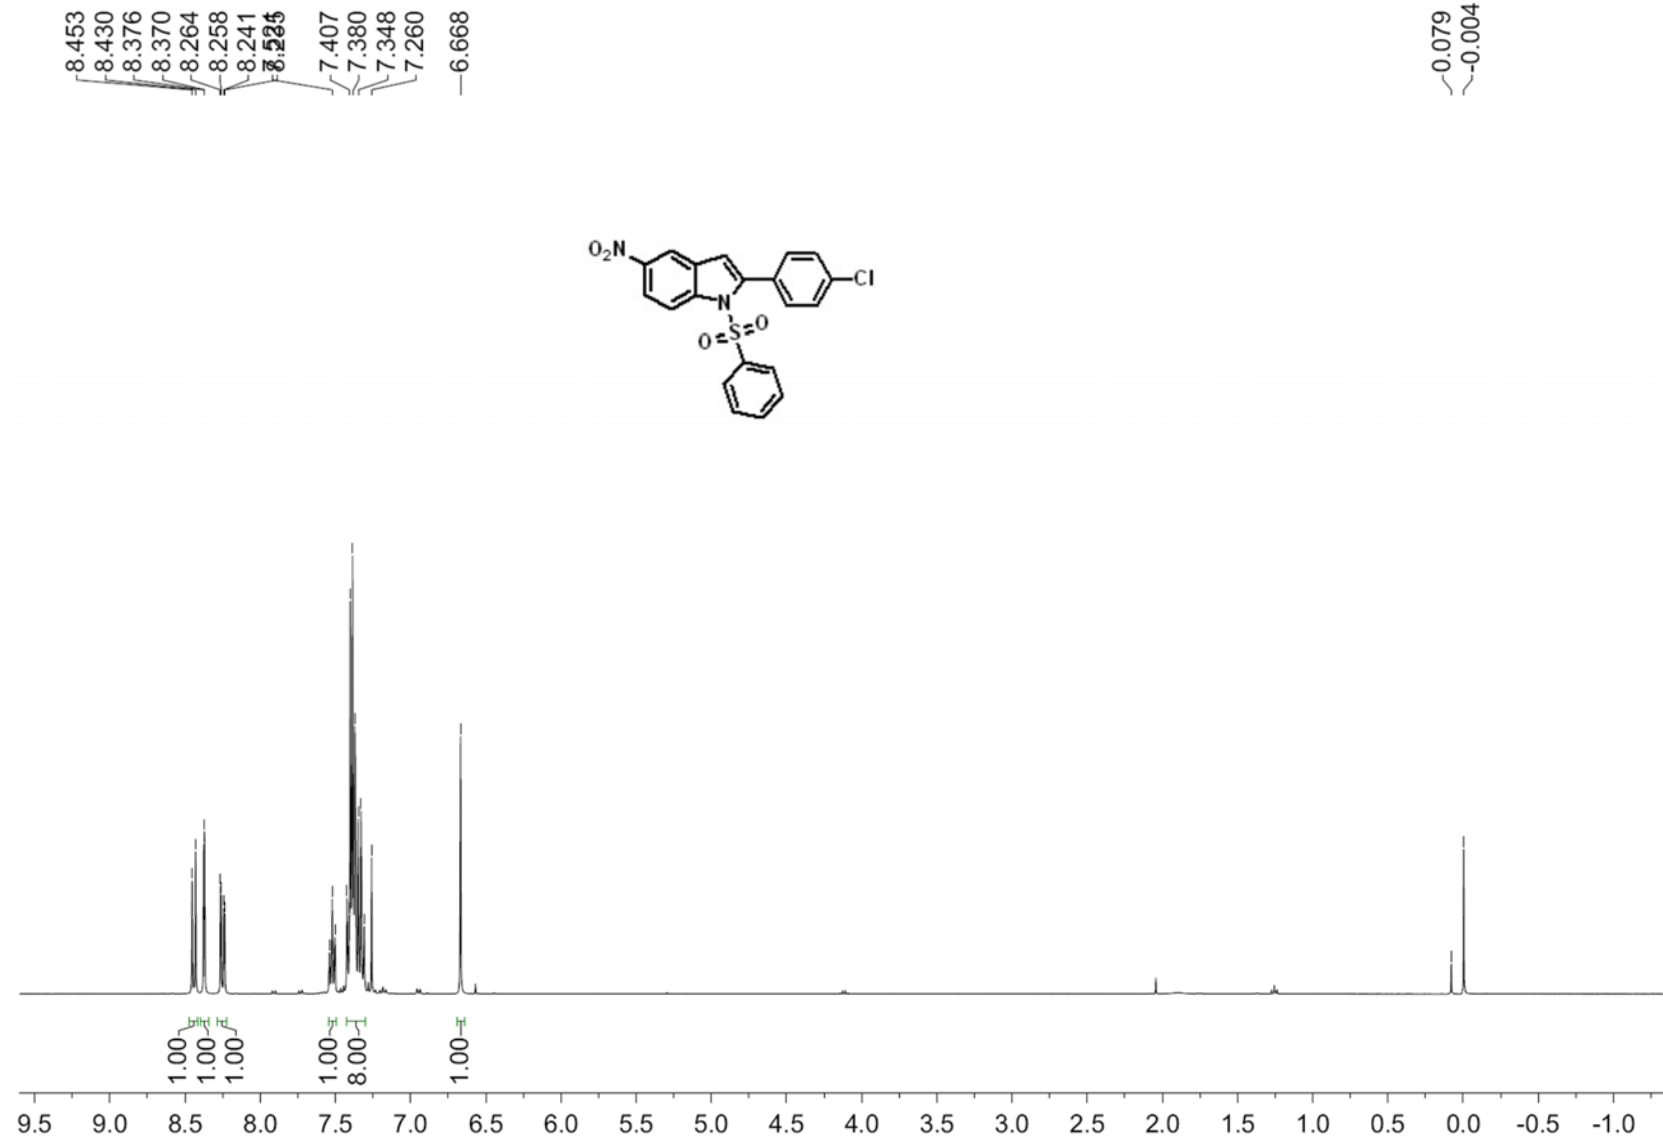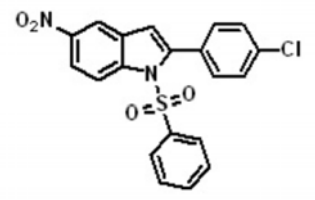

<sup>1</sup>H NMR Spectrum of Compound **2p**

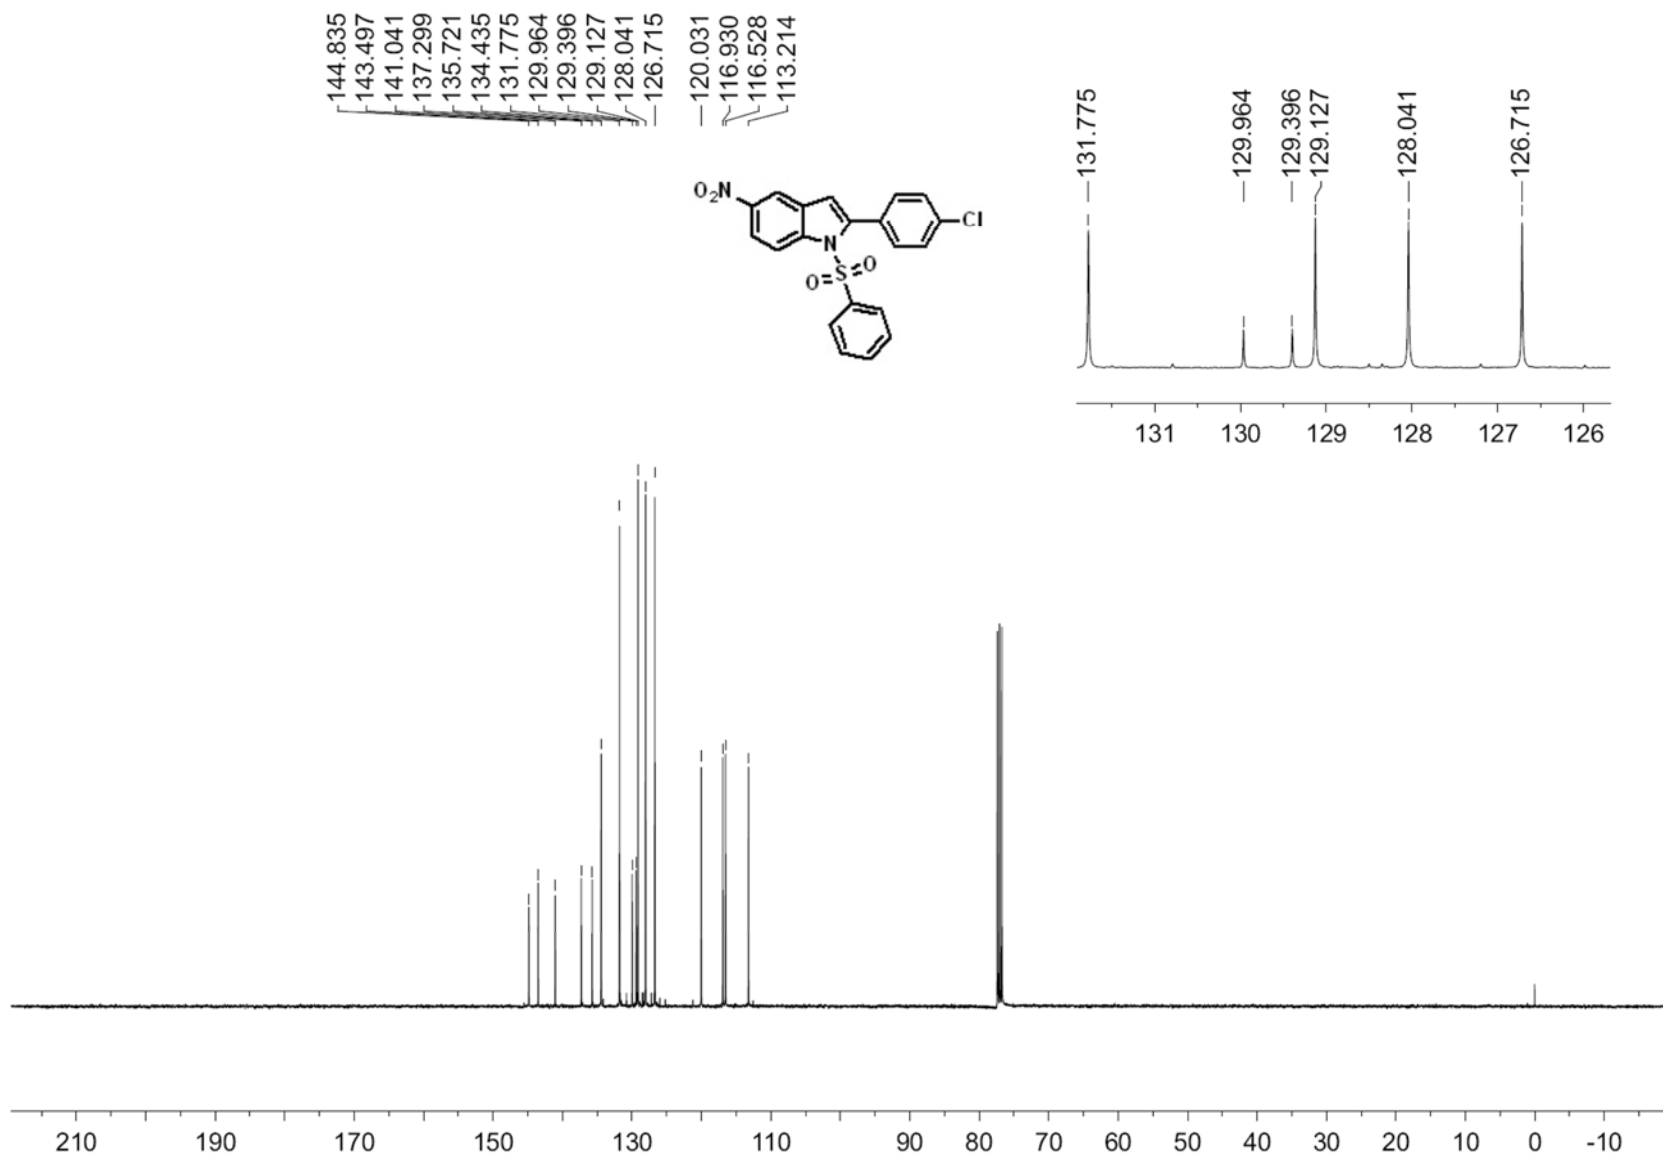

<sup>13</sup>C NMR Spectrum of Compound **2p**

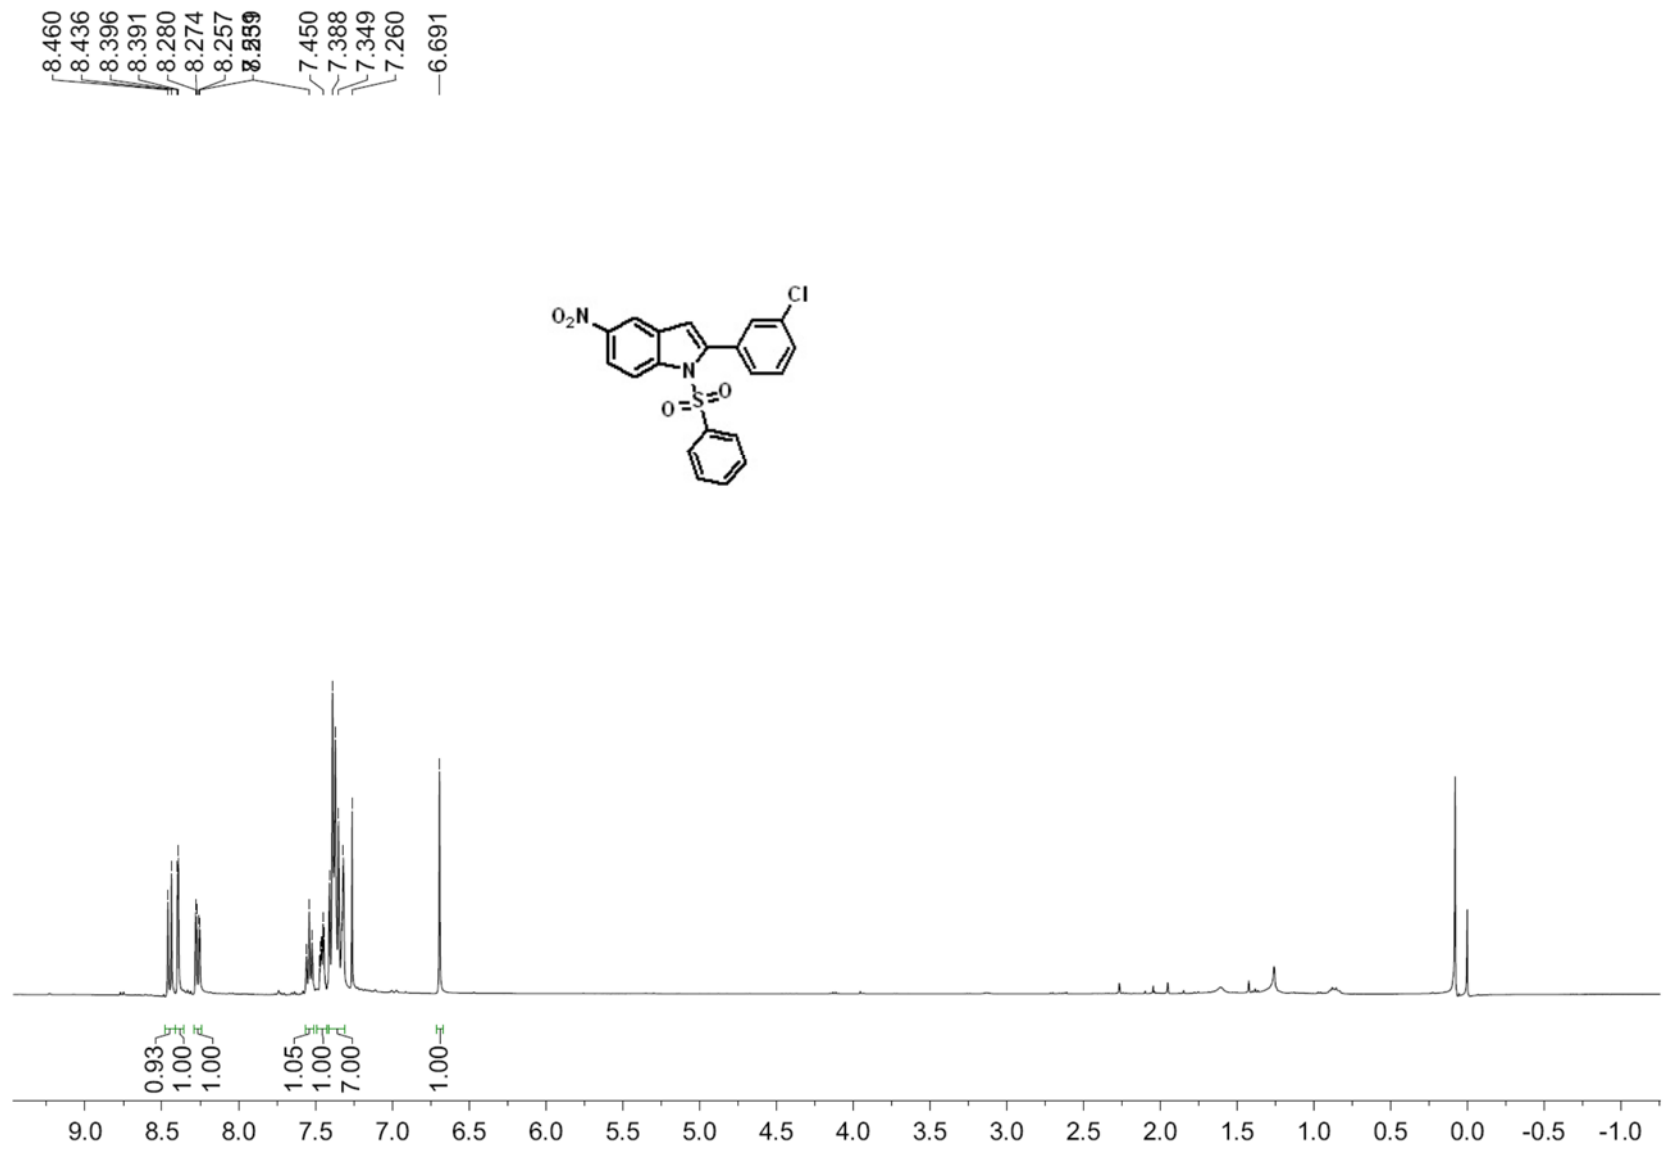

<sup>1</sup>H NMR Spectrum of Compound **2q**

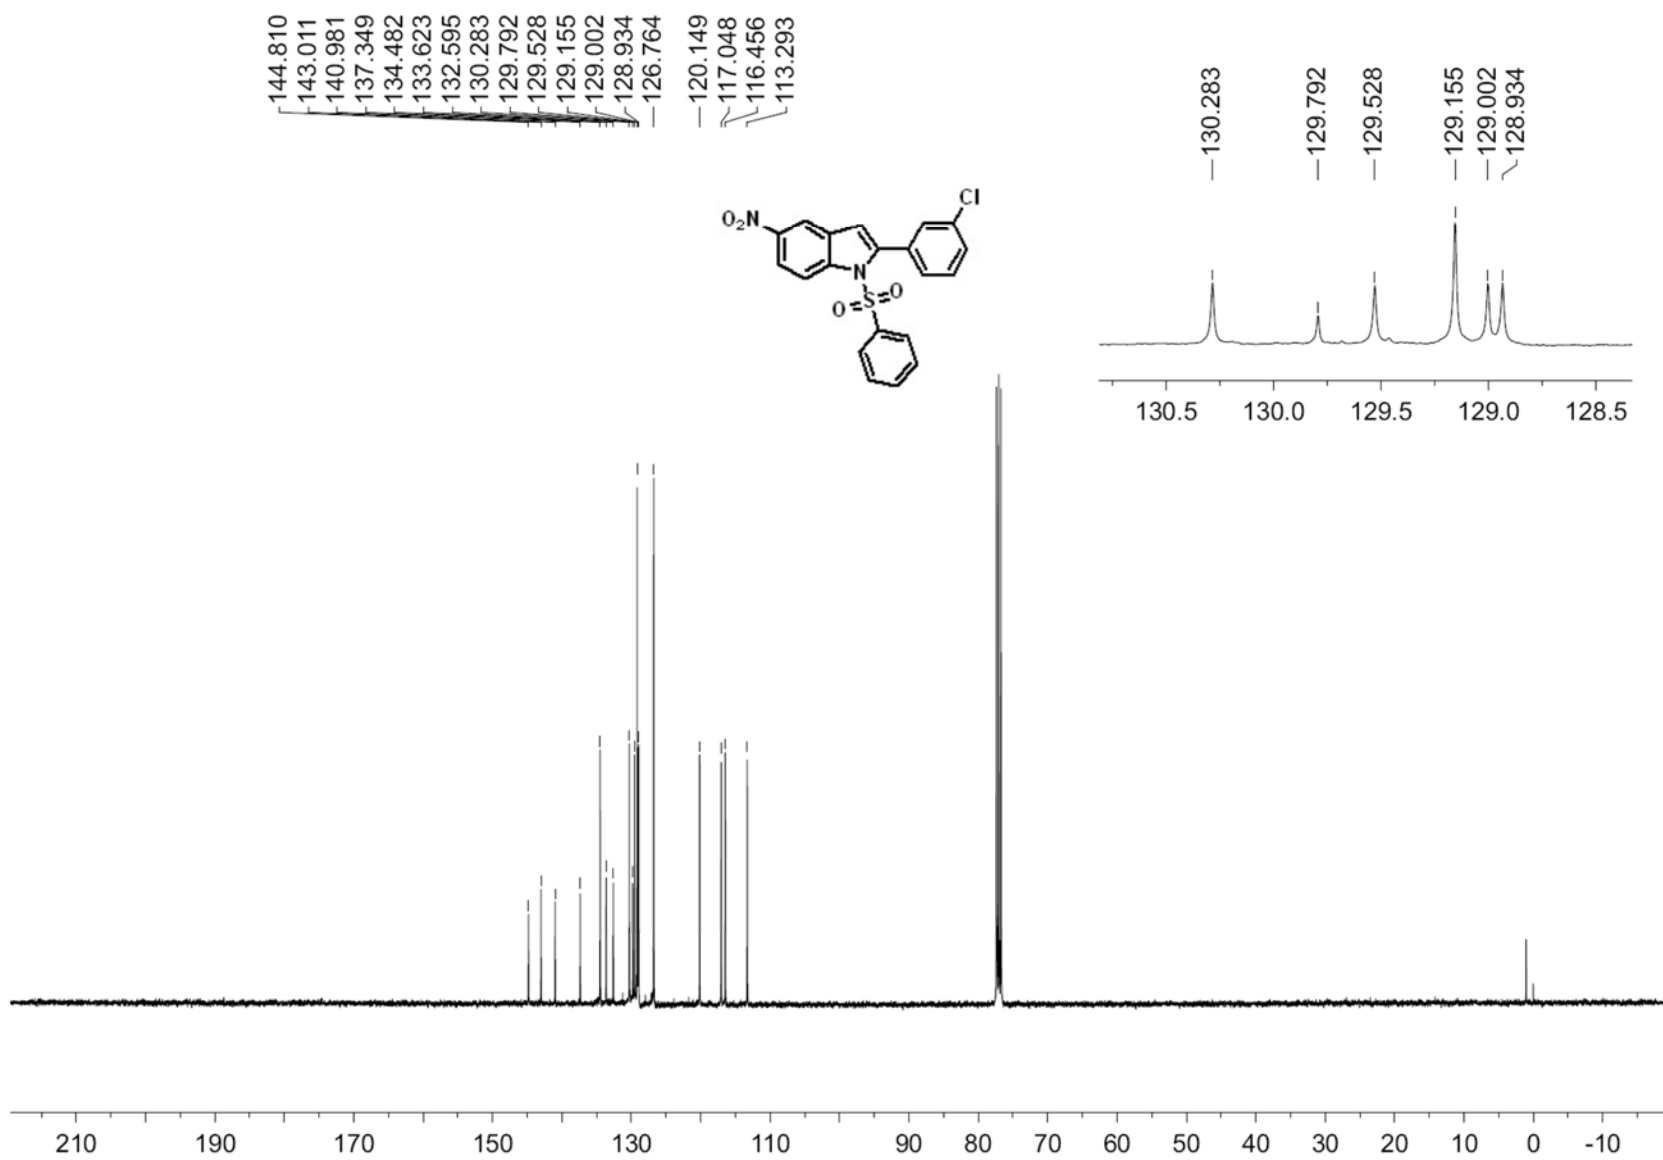

<sup>13</sup>C NMR Spectrum of Compound 2q

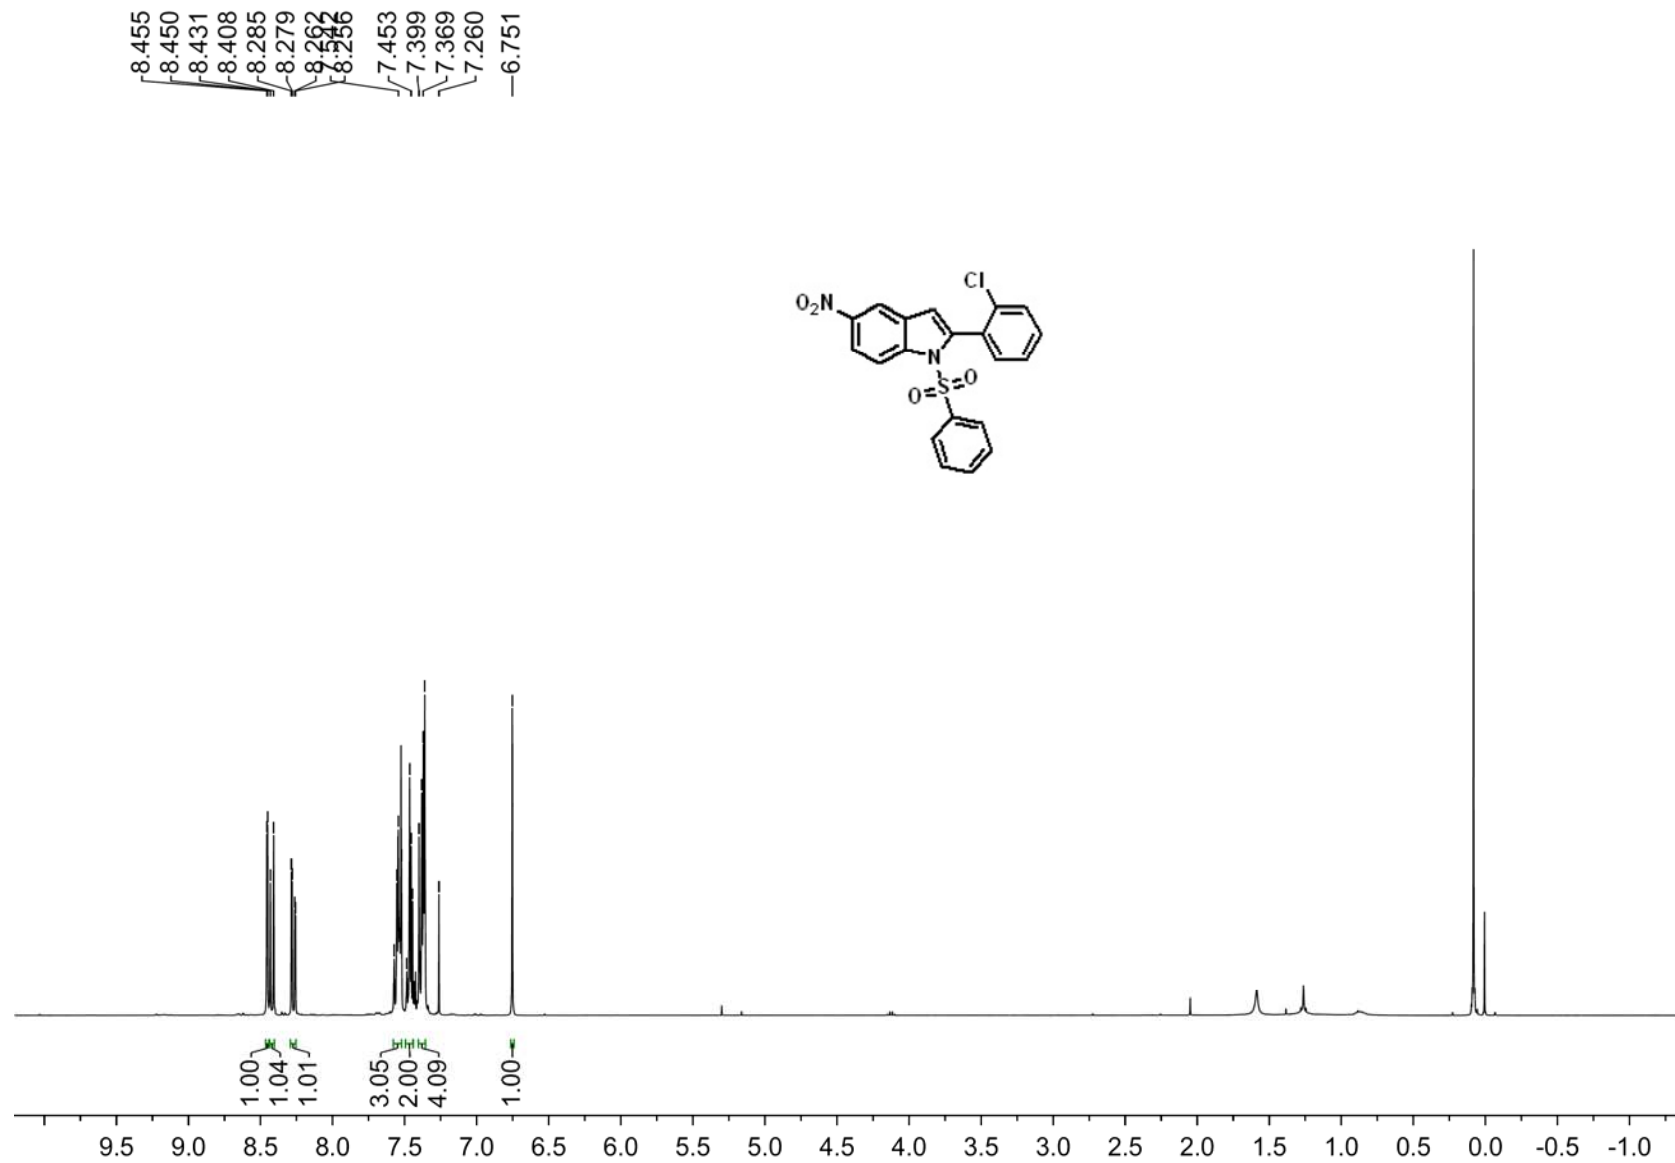

<sup>1</sup>H NMR Spectrum of Compound 2r

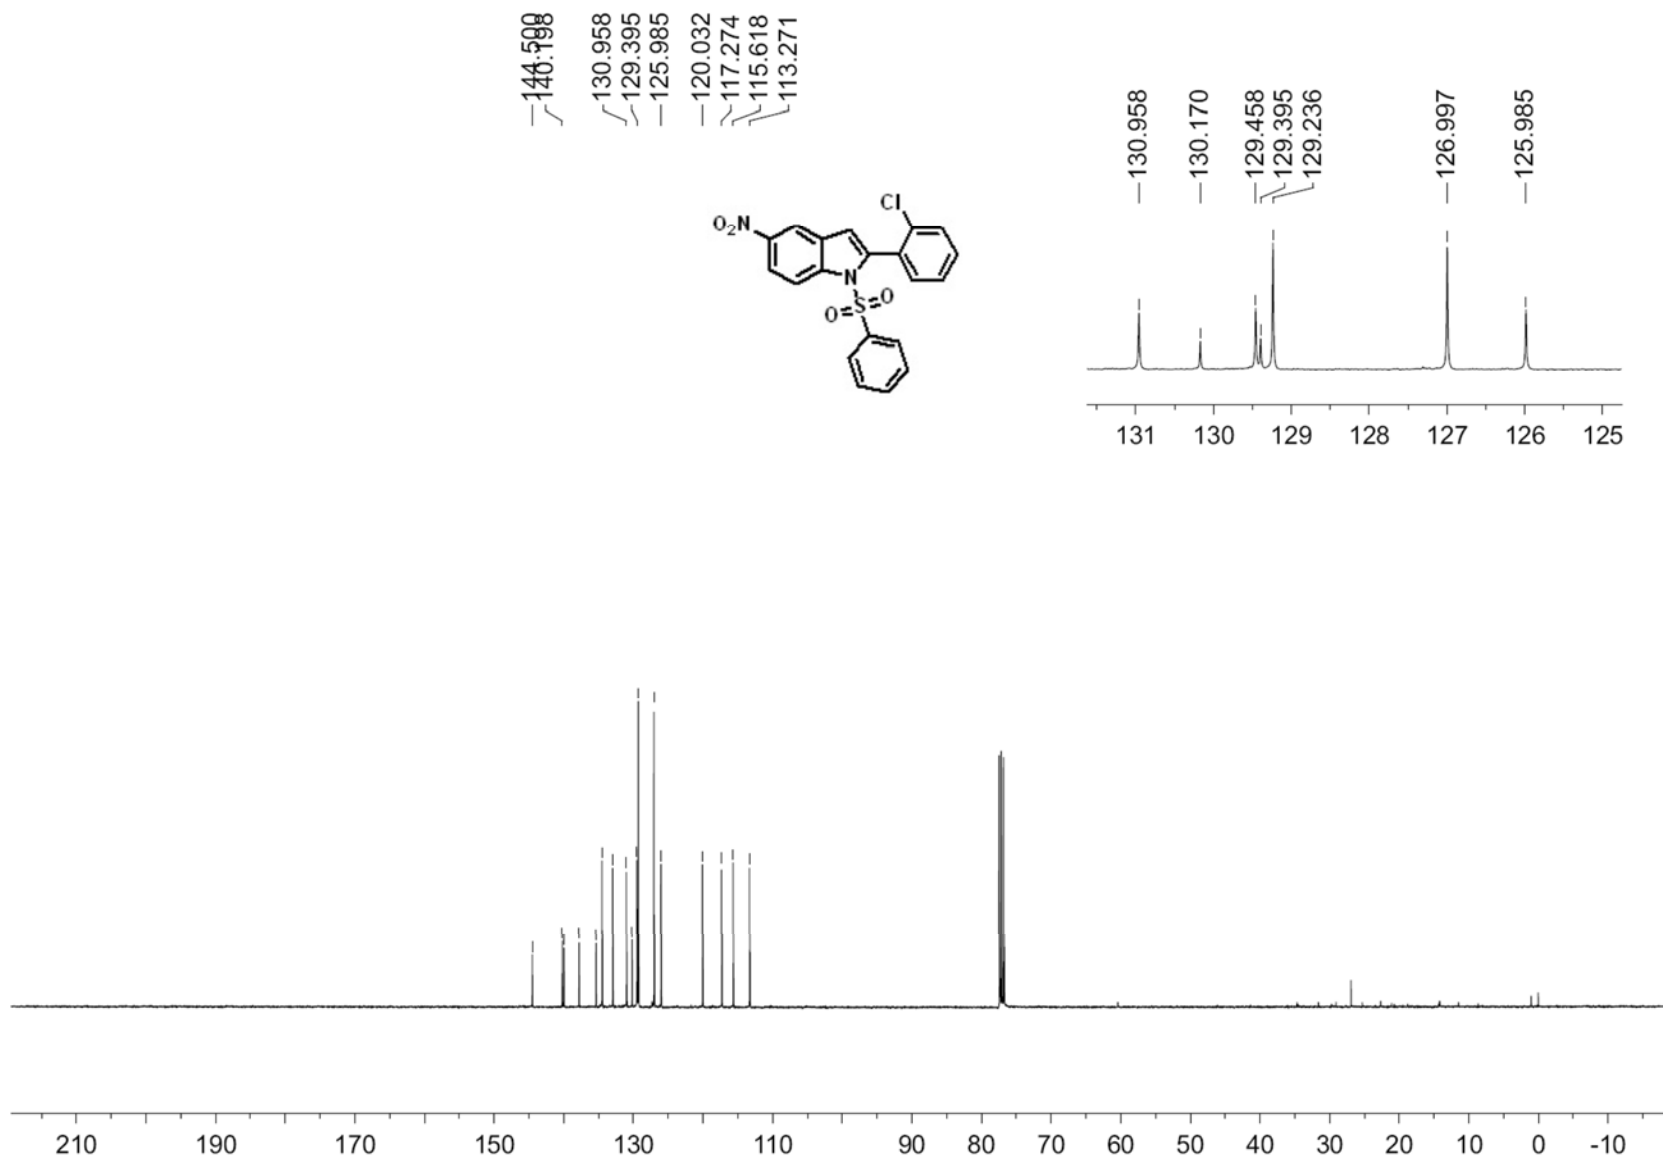

<sup>13</sup>C NMR Spectrum of Compound **2r**

8.454  
8.431  
8.380  
8.374  
8.269  
8.263  
8.246  
8.240  
7.580  
7.391  
7.348  
7.318  
7.302  
-6.670

-0.003

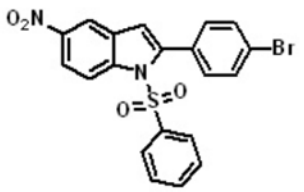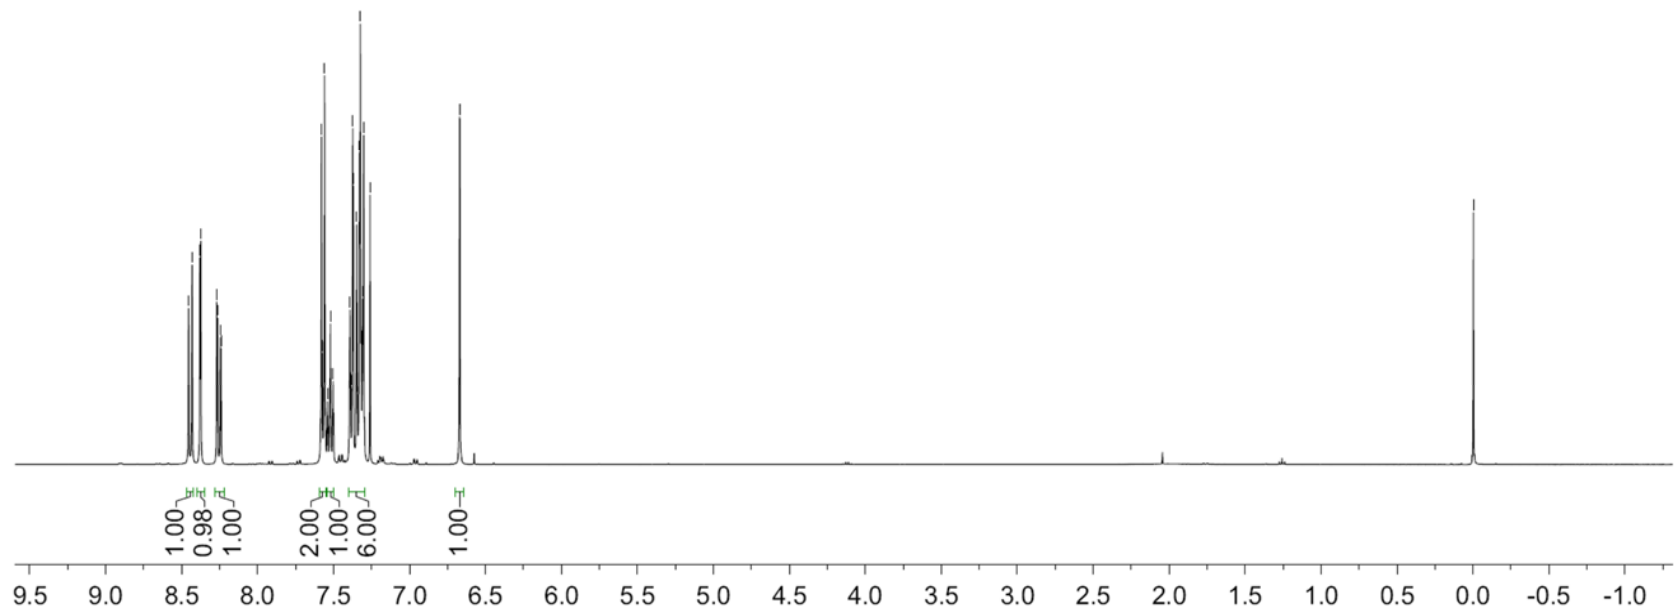

<sup>1</sup>H NMR Spectrum of Compound 2s



144.856  
143.528  
141.054  
137.290  
134.434  
131.992  
131.000  
129.969  
129.871  
129.127  
126.718  
124.040  
120.055  
116.934  
116.543  
113.212

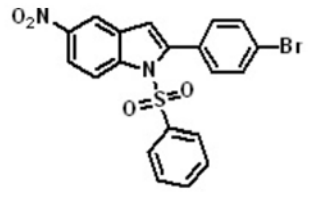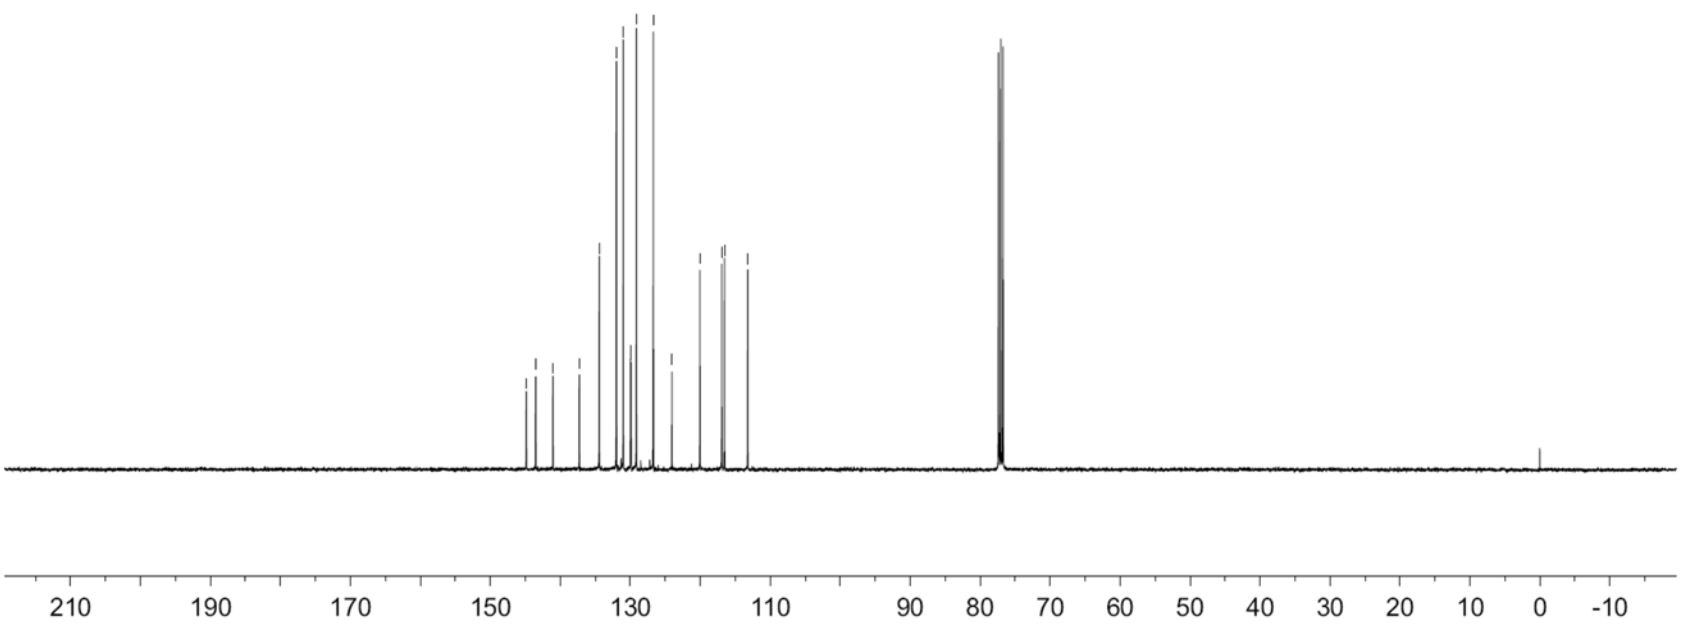

<sup>13</sup>C NMR Spectrum of Compound 2s

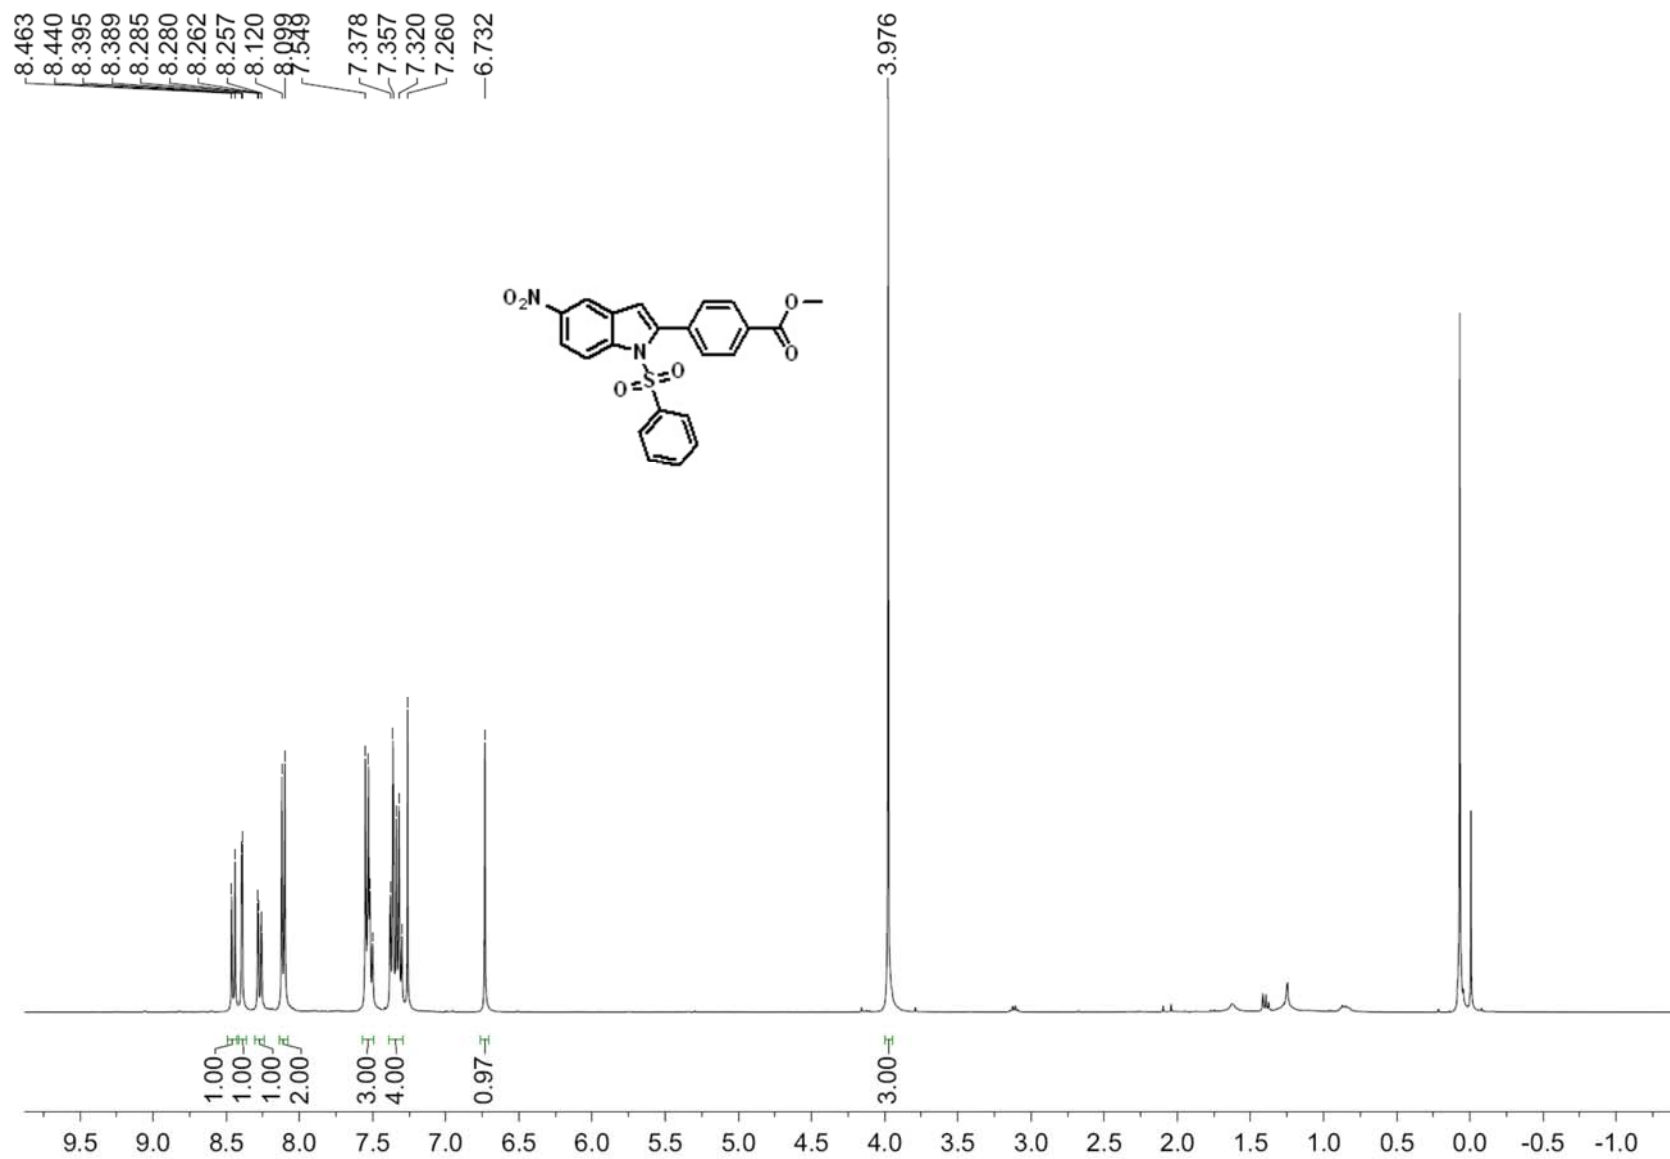

<sup>1</sup>H NMR Spectrum of Compound 2t

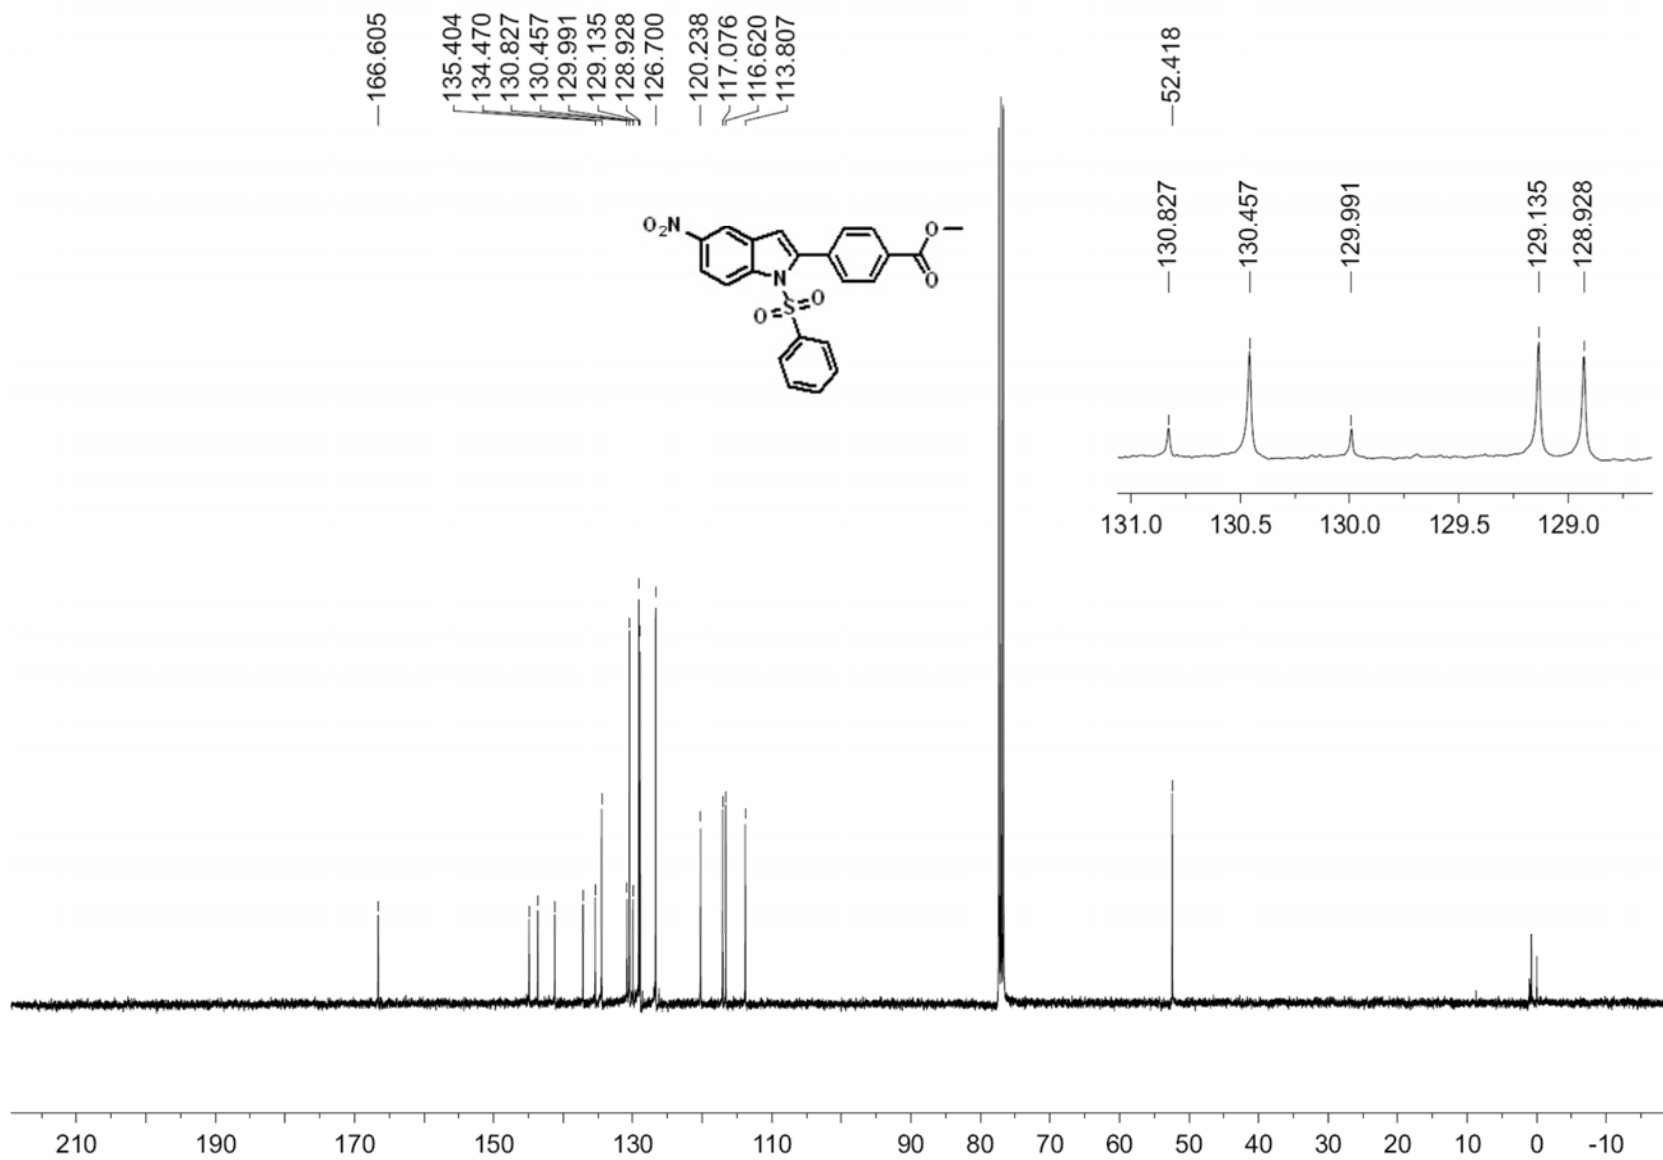

<sup>13</sup>C NMR Spectrum of Compound 2t

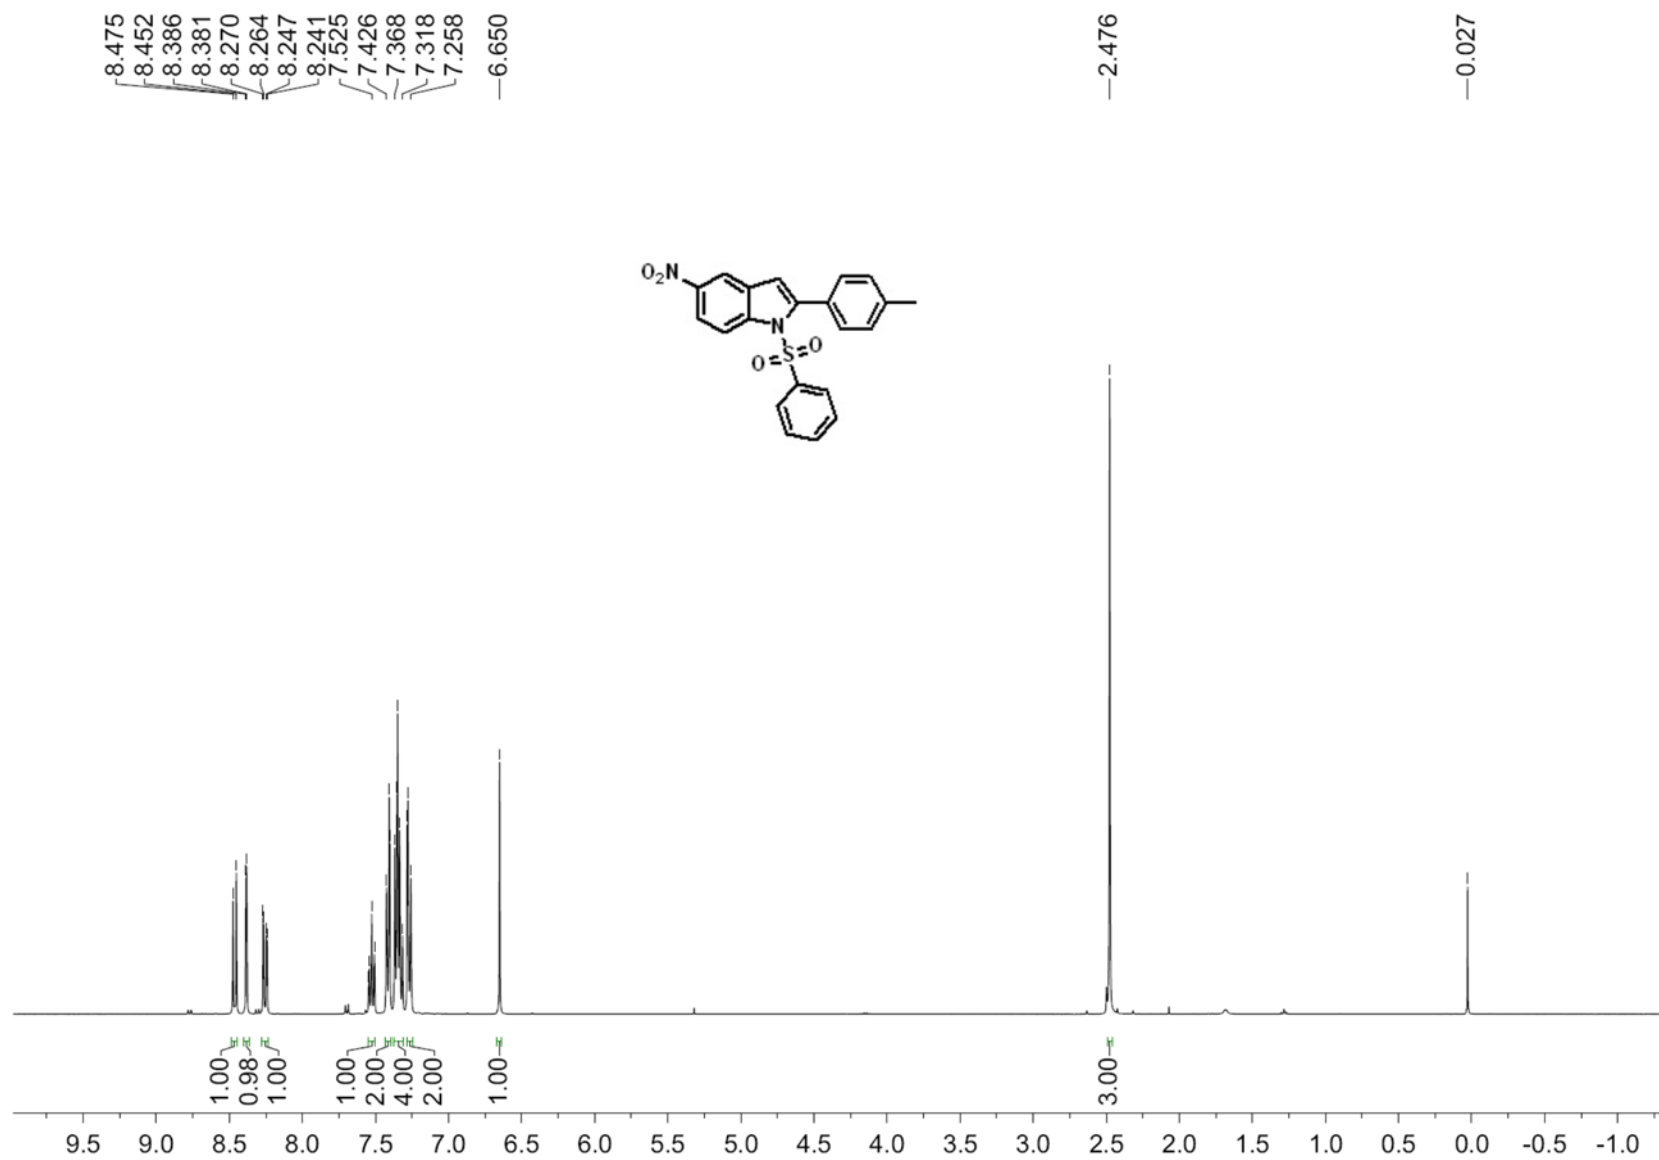

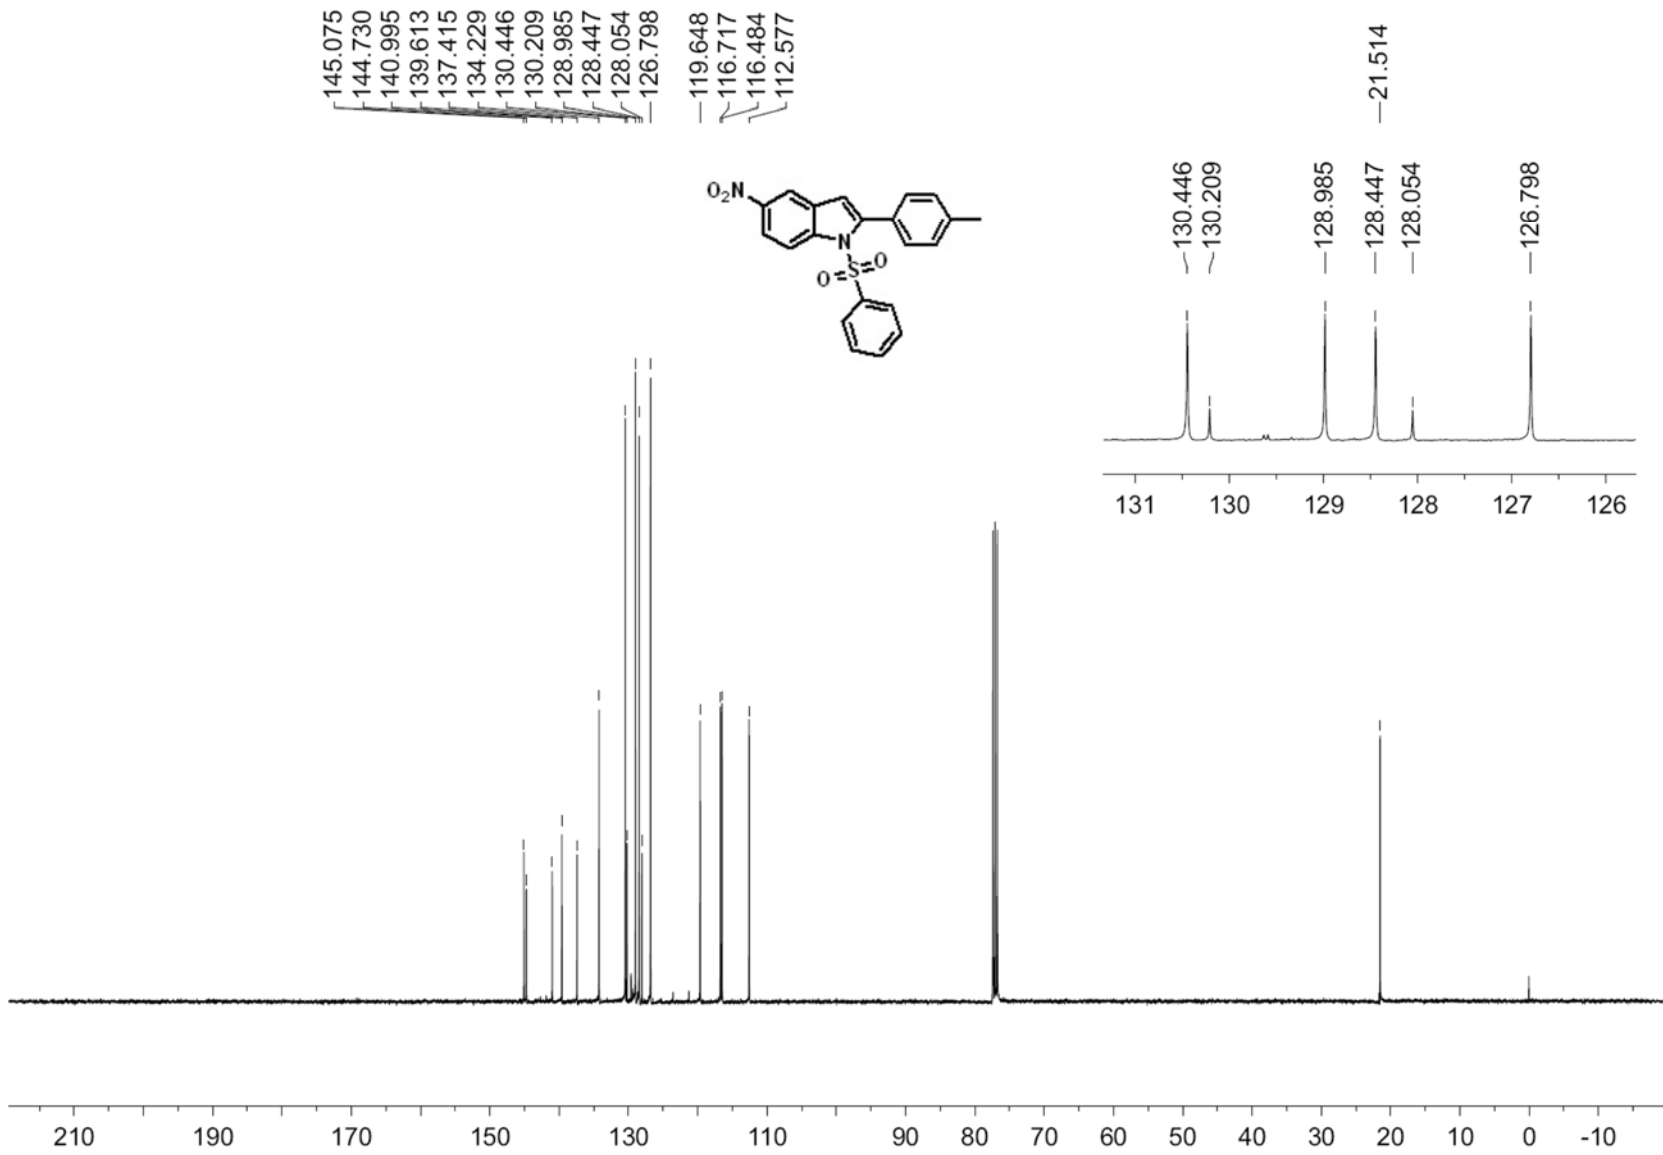

<sup>13</sup>C NMR Spectrum of Compound **2u**

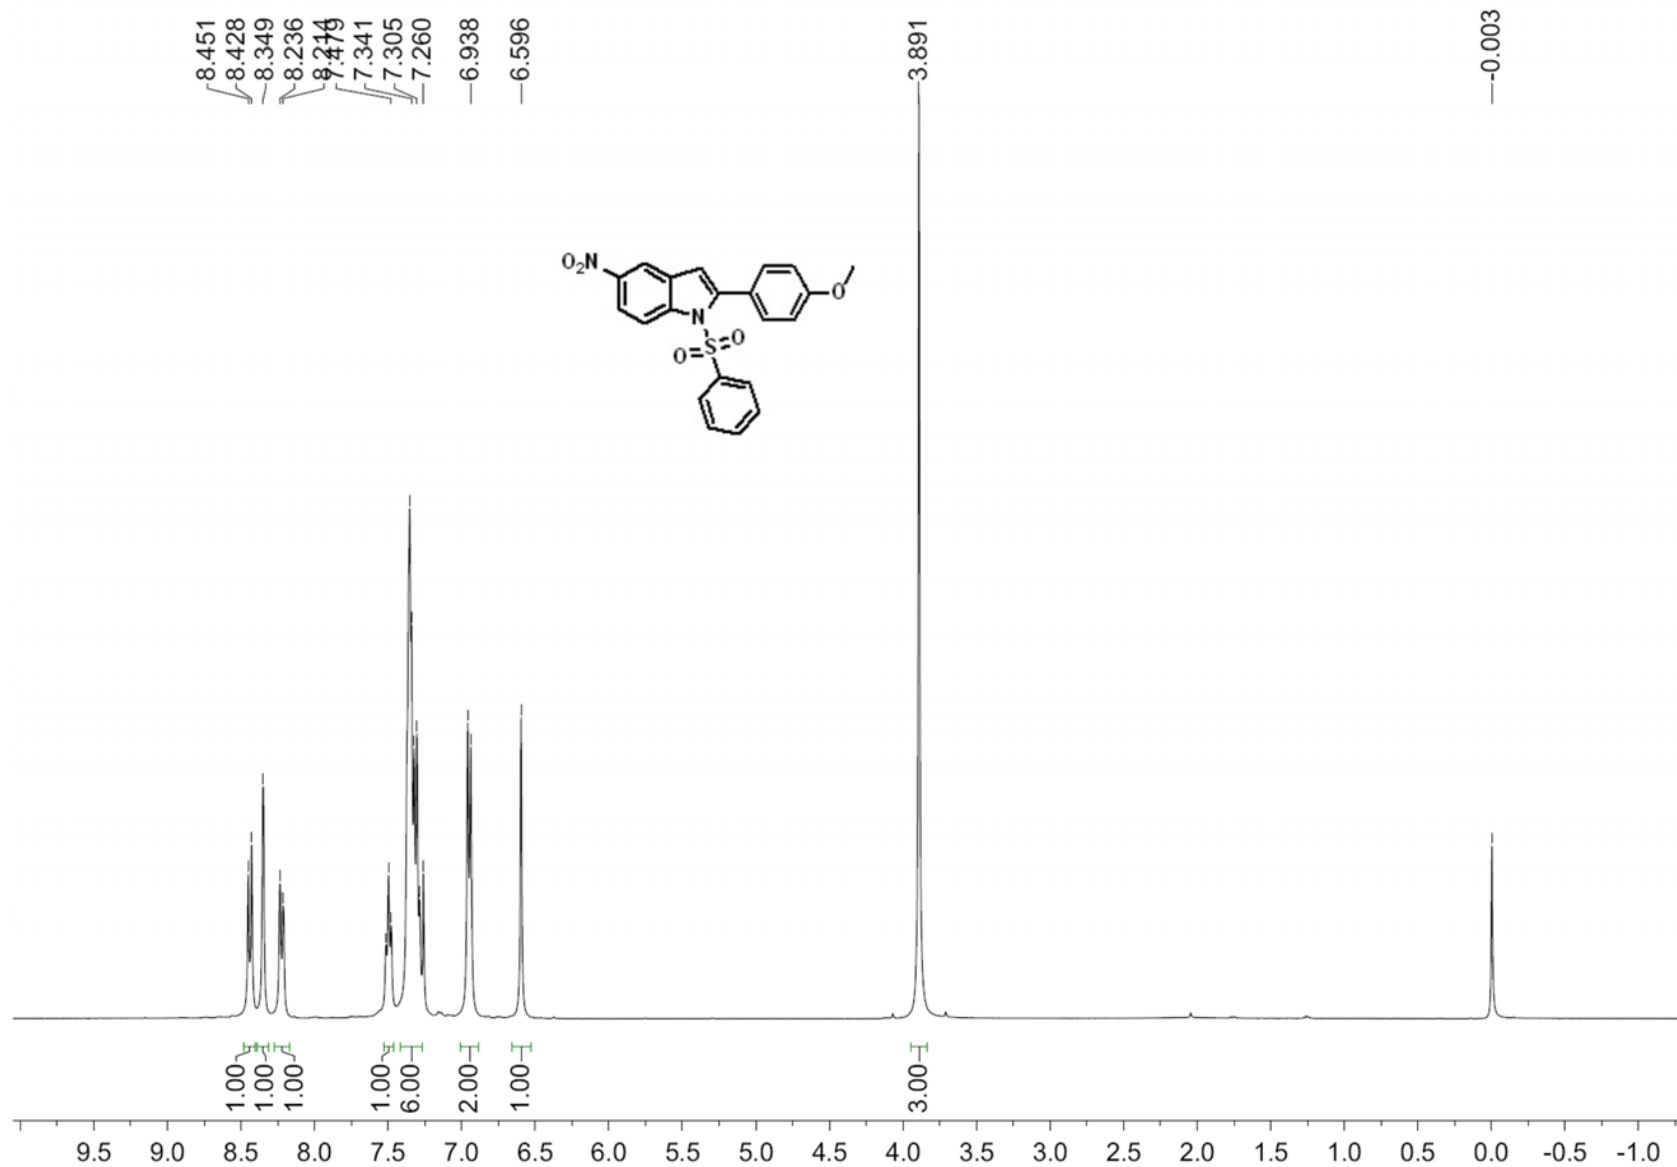

<sup>1</sup>H NMR Spectrum of Compound 2v

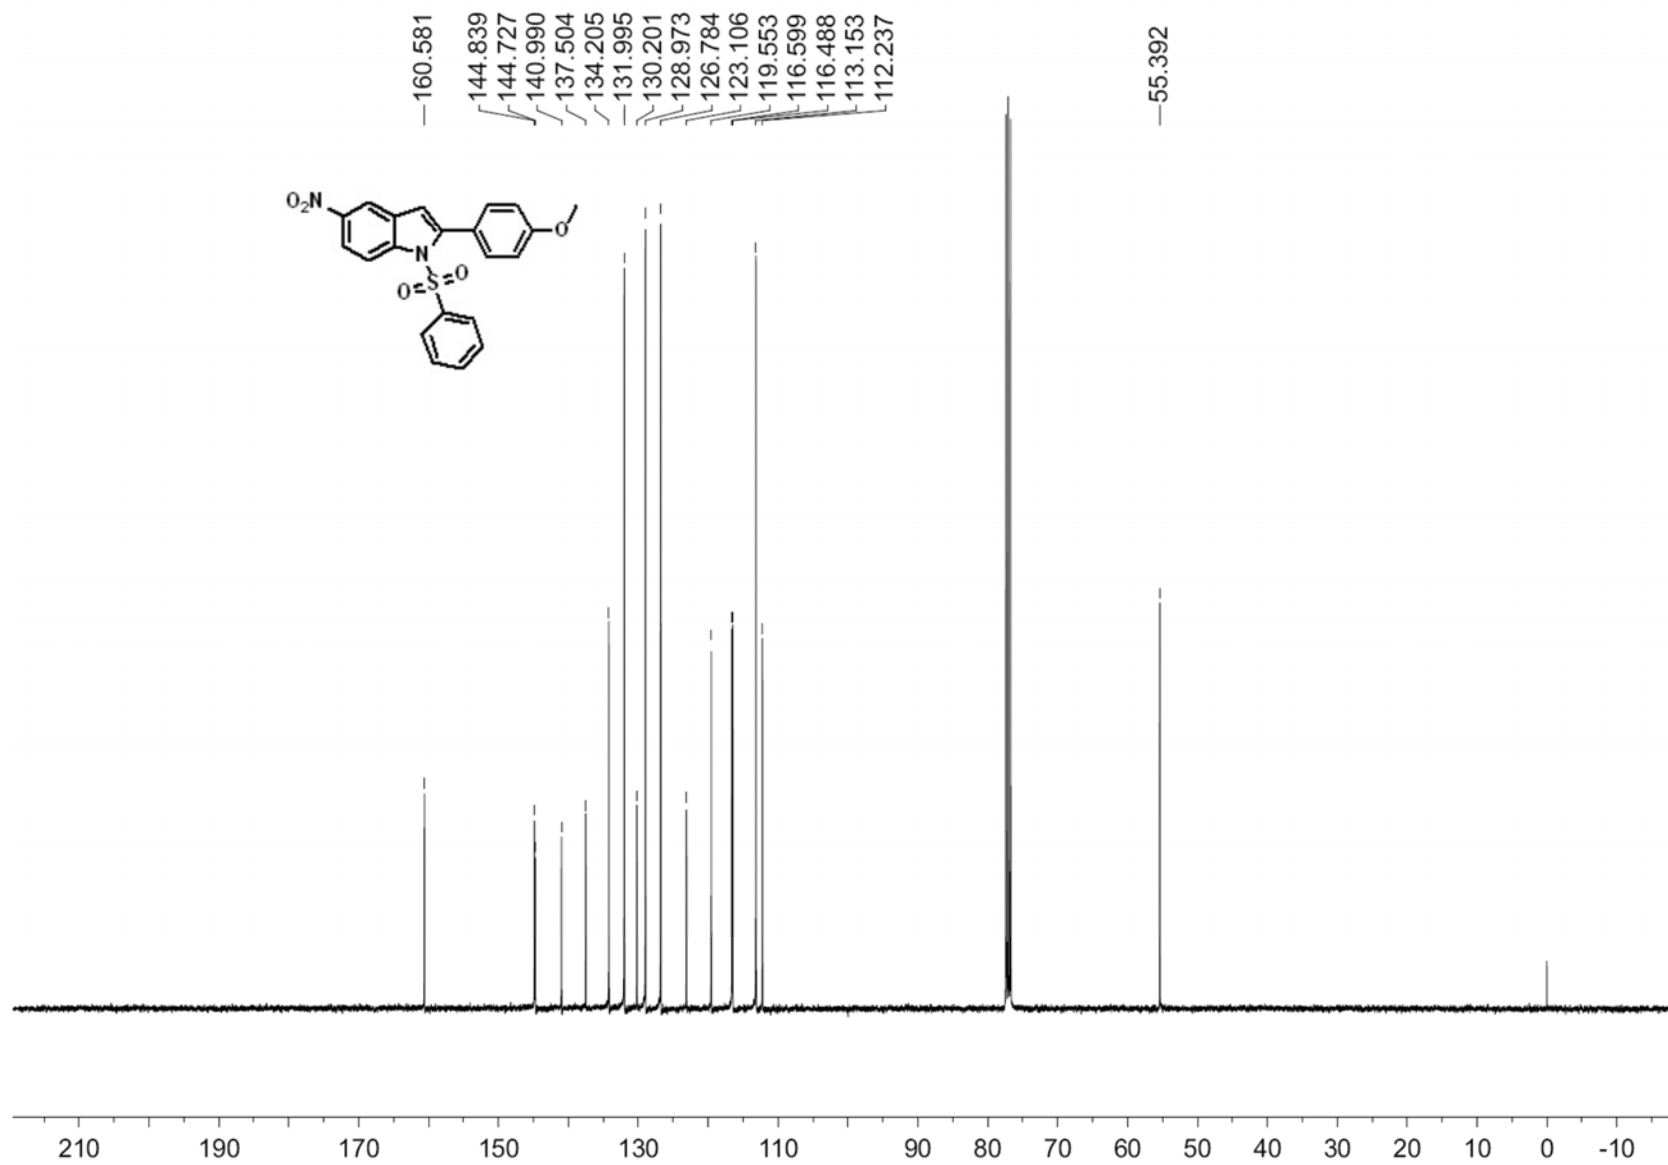

<sup>13</sup>C NMR Spectrum of Compound 2v

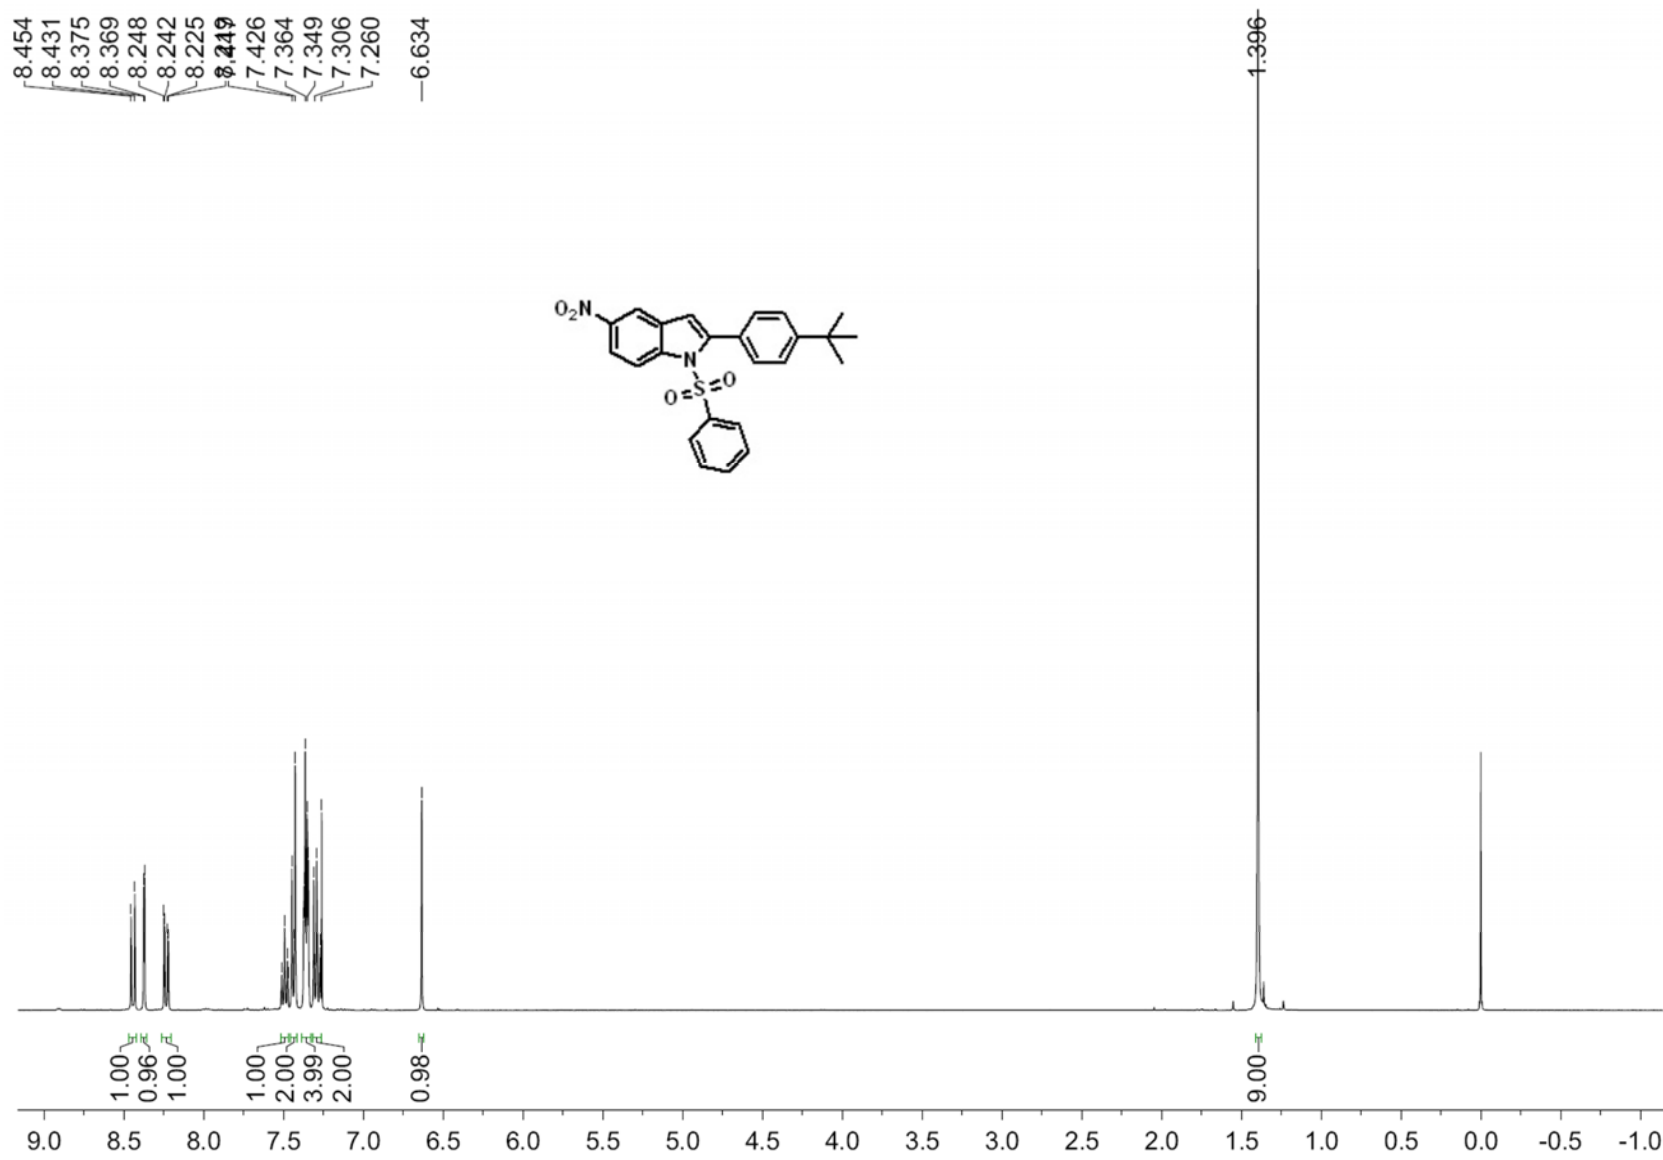

<sup>1</sup>H NMR Spectrum of Compound 2w



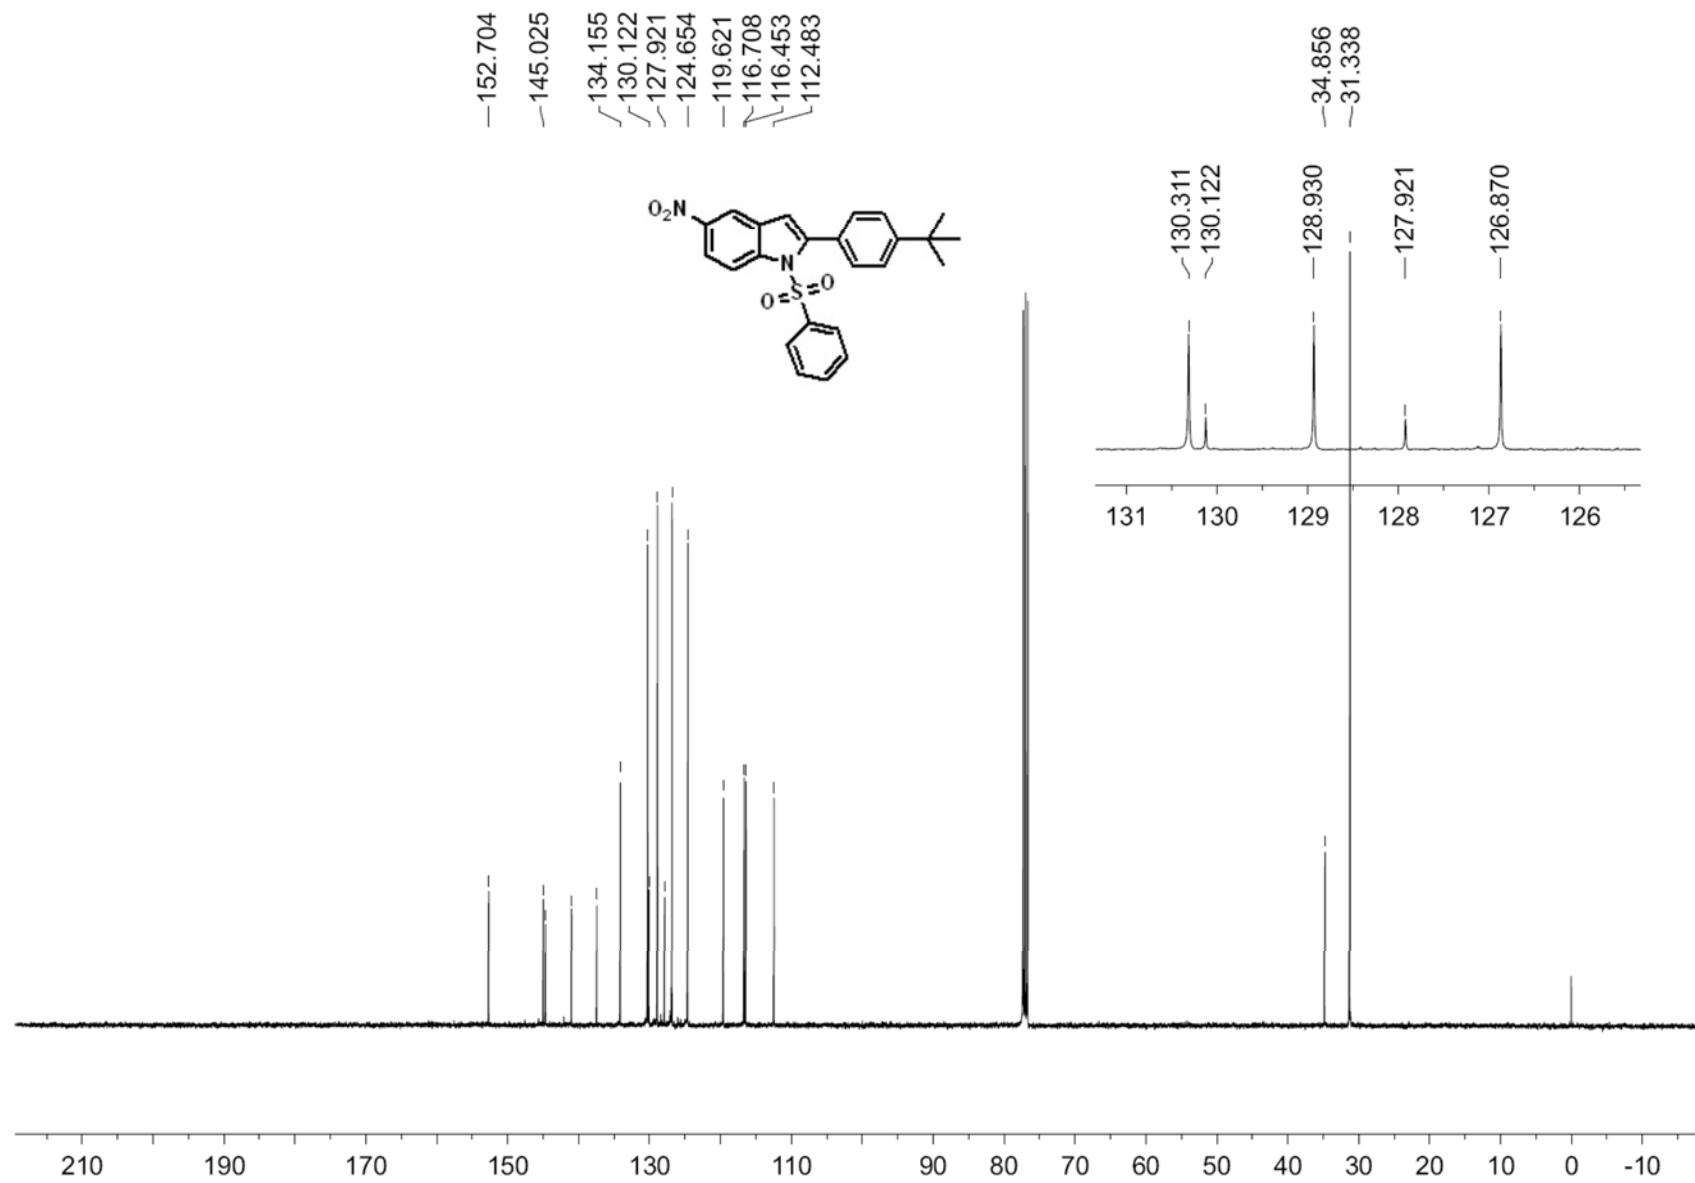

<sup>13</sup>C NMR Spectrum of Compound 2w

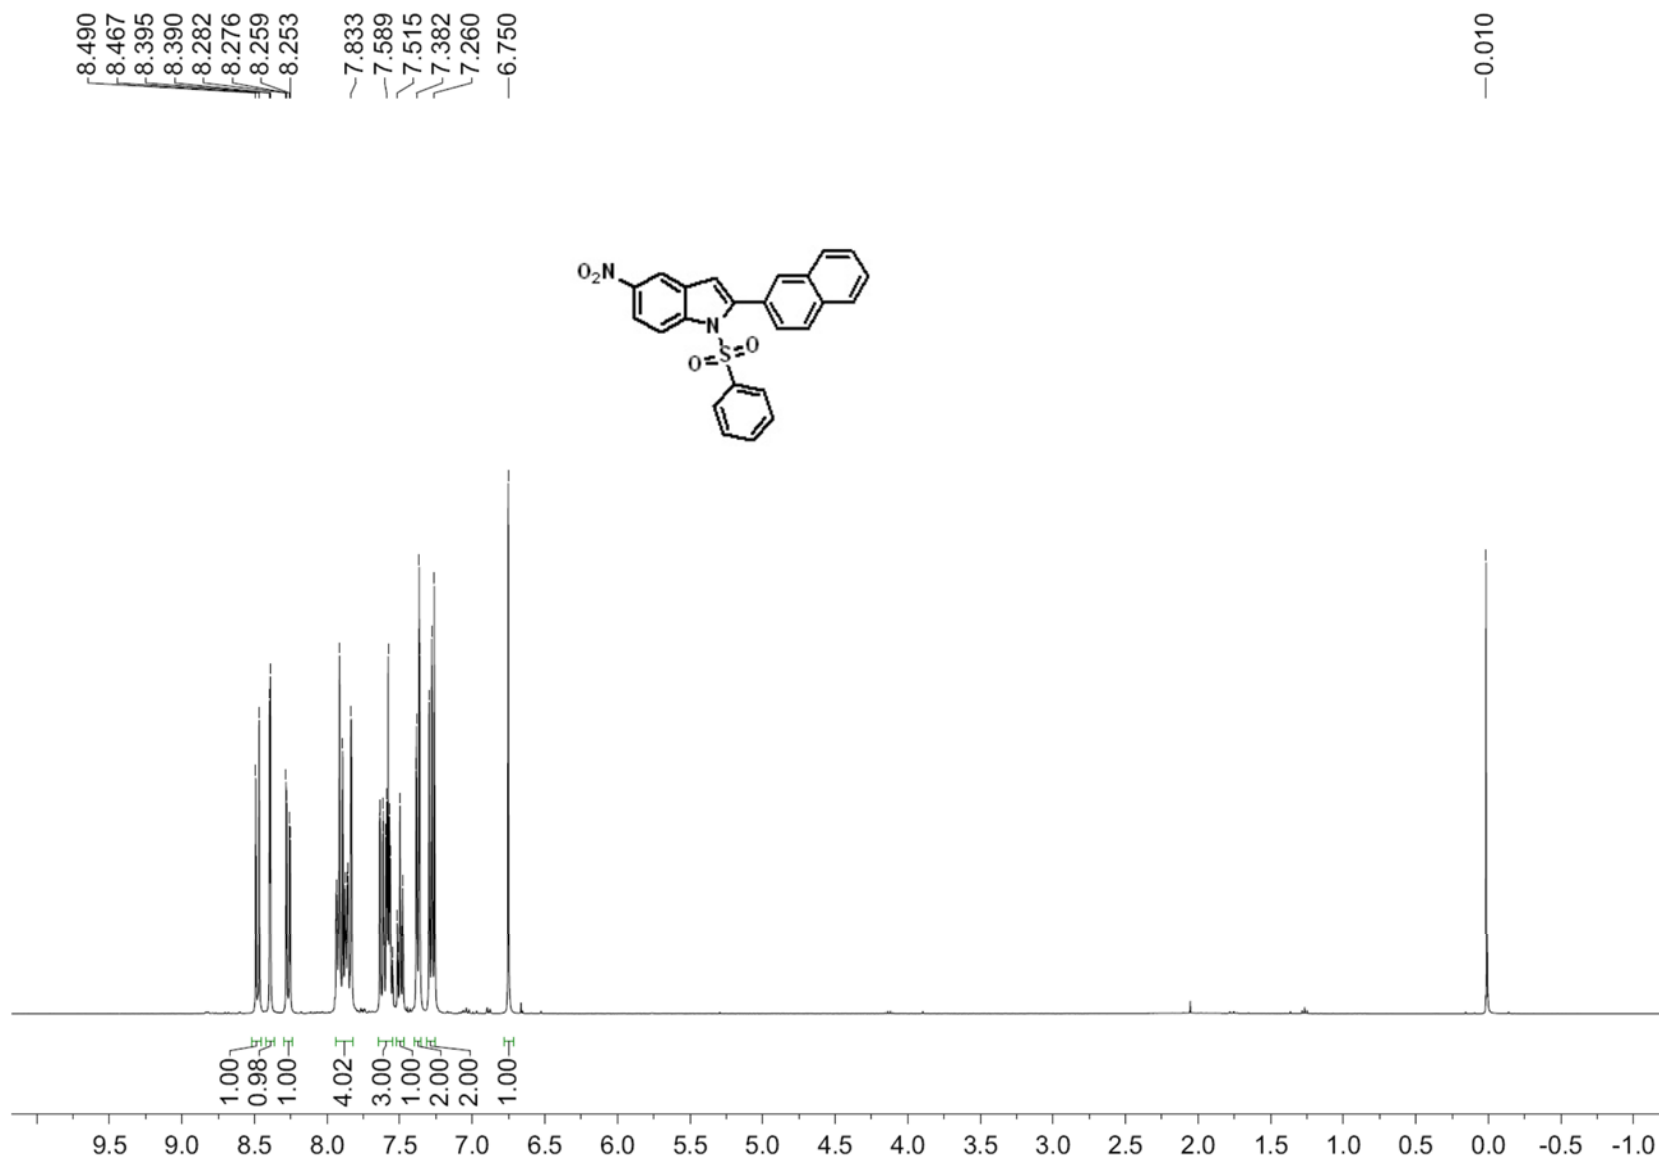

<sup>1</sup>H NMR Spectrum of Compound 2x

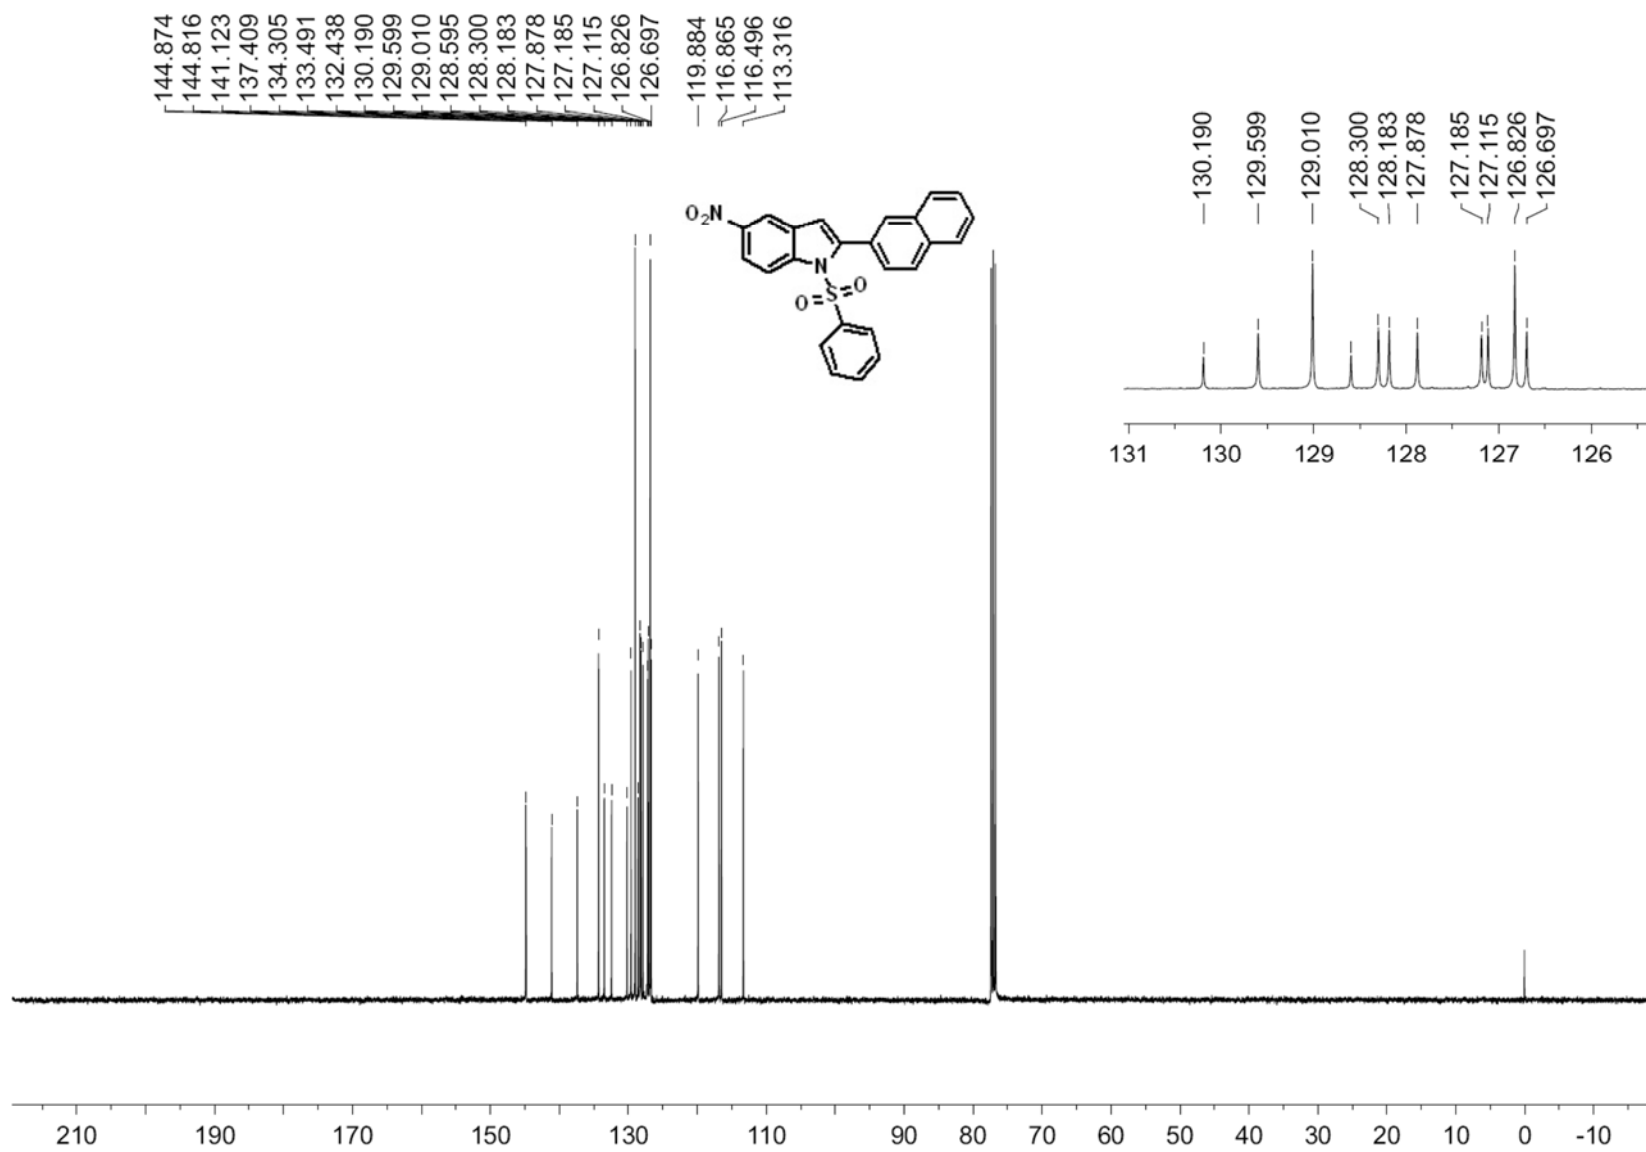

<sup>13</sup>C NMR Spectrum of Compound 2x

8.467  
8.443  
8.379  
8.374  
8.254  
8.248  
8.231  
8.225  
7.371  
7.356  
7.318  
7.260  
7.229  
—6.683

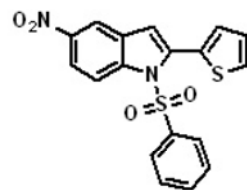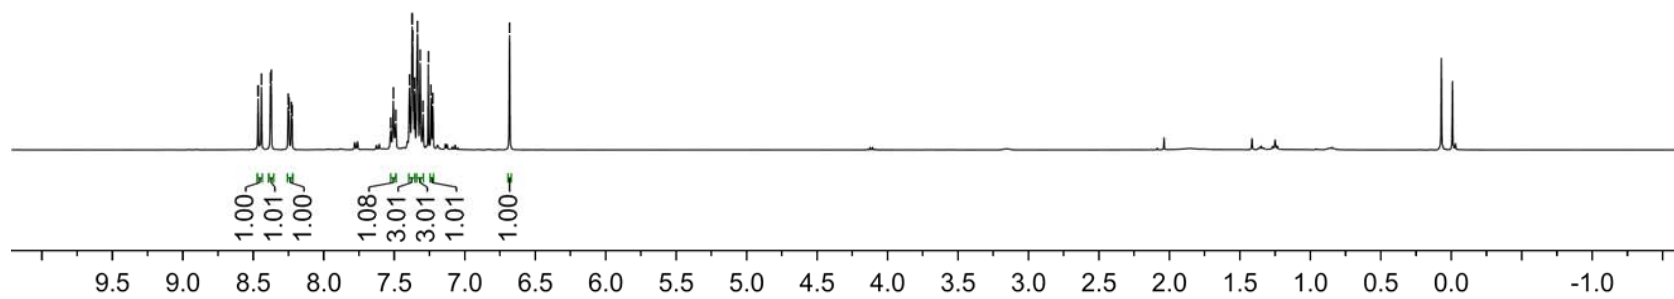

<sup>1</sup>H NMR Spectrum of Compound **2y**

—144.637  
/139.330  
—137.630  
—134.263  
~129.044  
—124.836  
/116.728  
/116.202  
—112.465

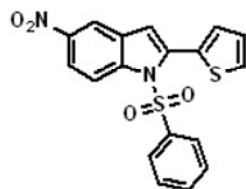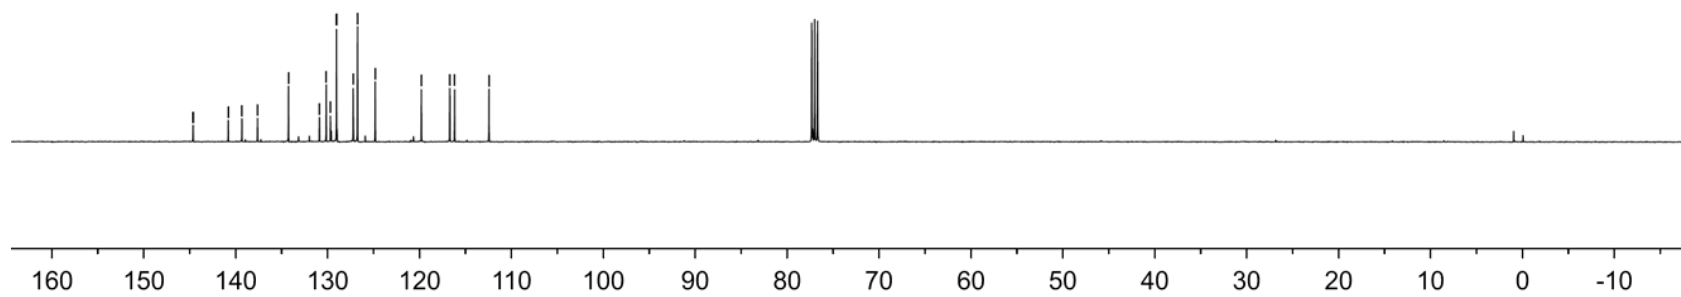

<sup>13</sup>C NMR Spectrum of Compound **2y**

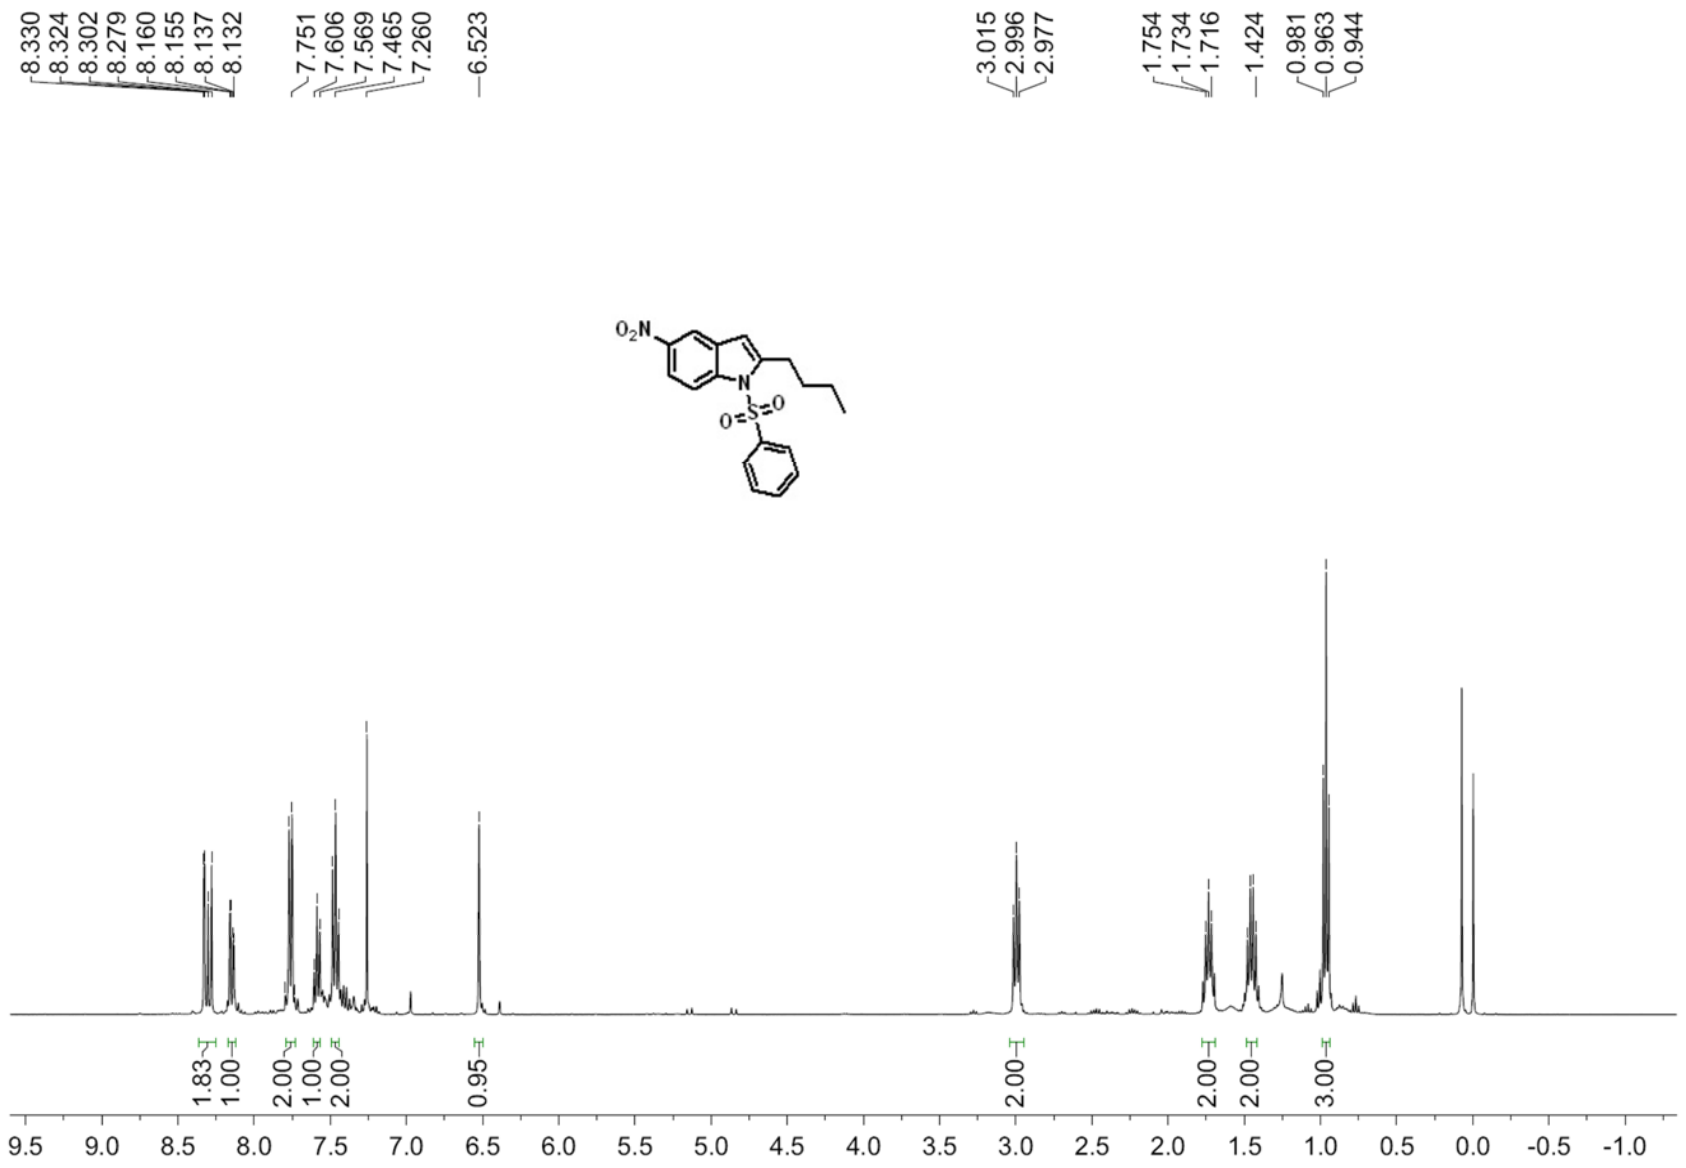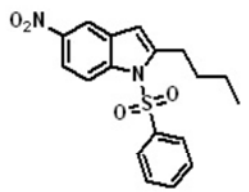

<sup>1</sup>H NMR Spectrum of Compound **2z**

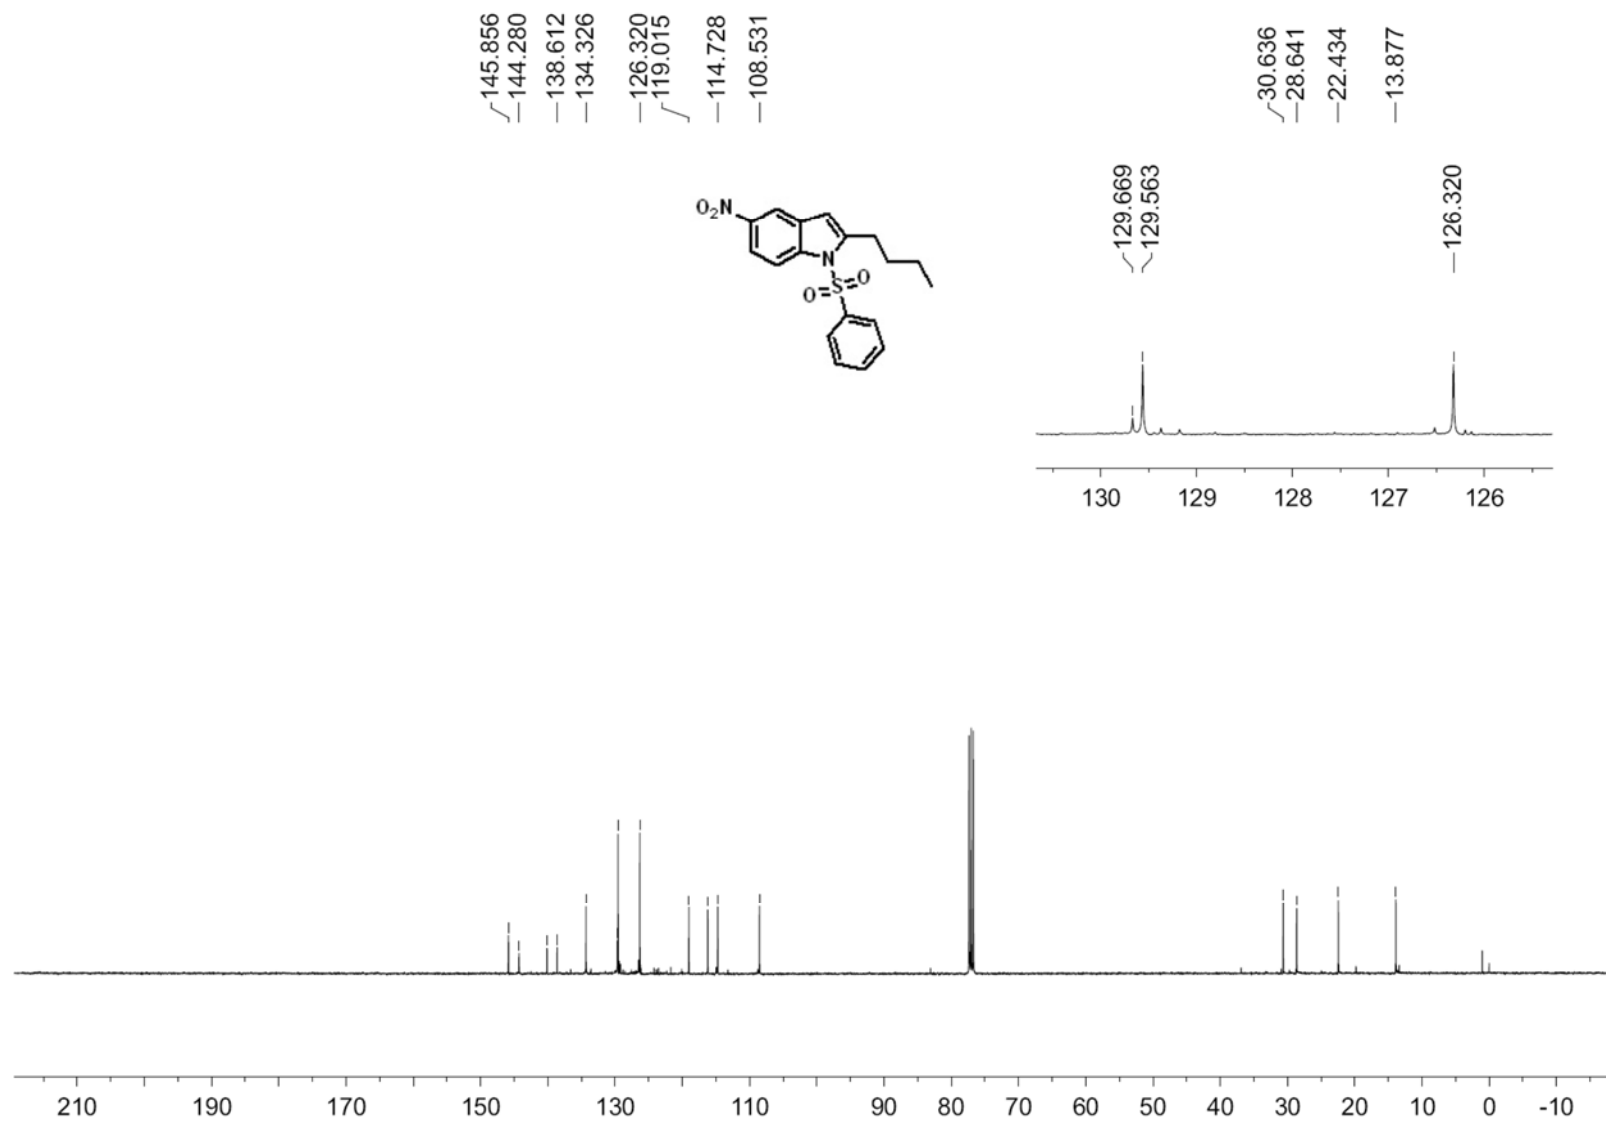

$^{13}\text{C}$  NMR Spectrum of Compound **2z**

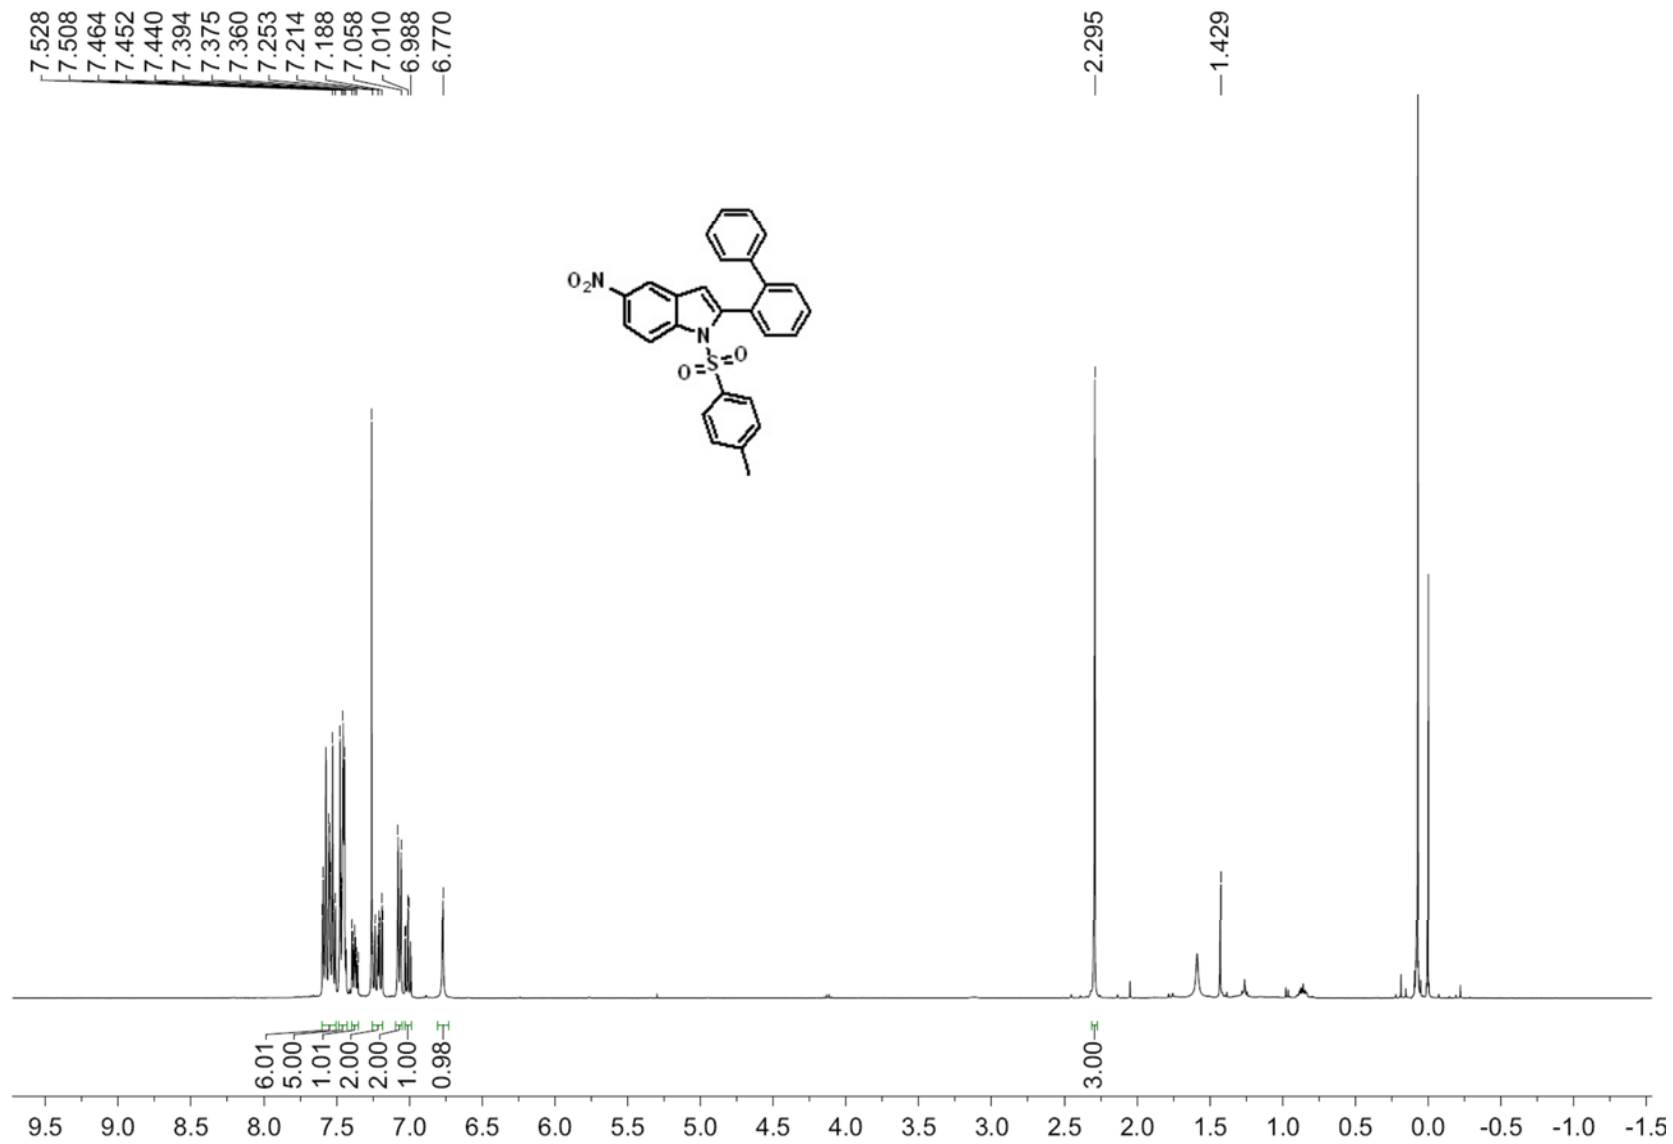

<sup>1</sup>H NMR Spectrum of Compound **2aa**



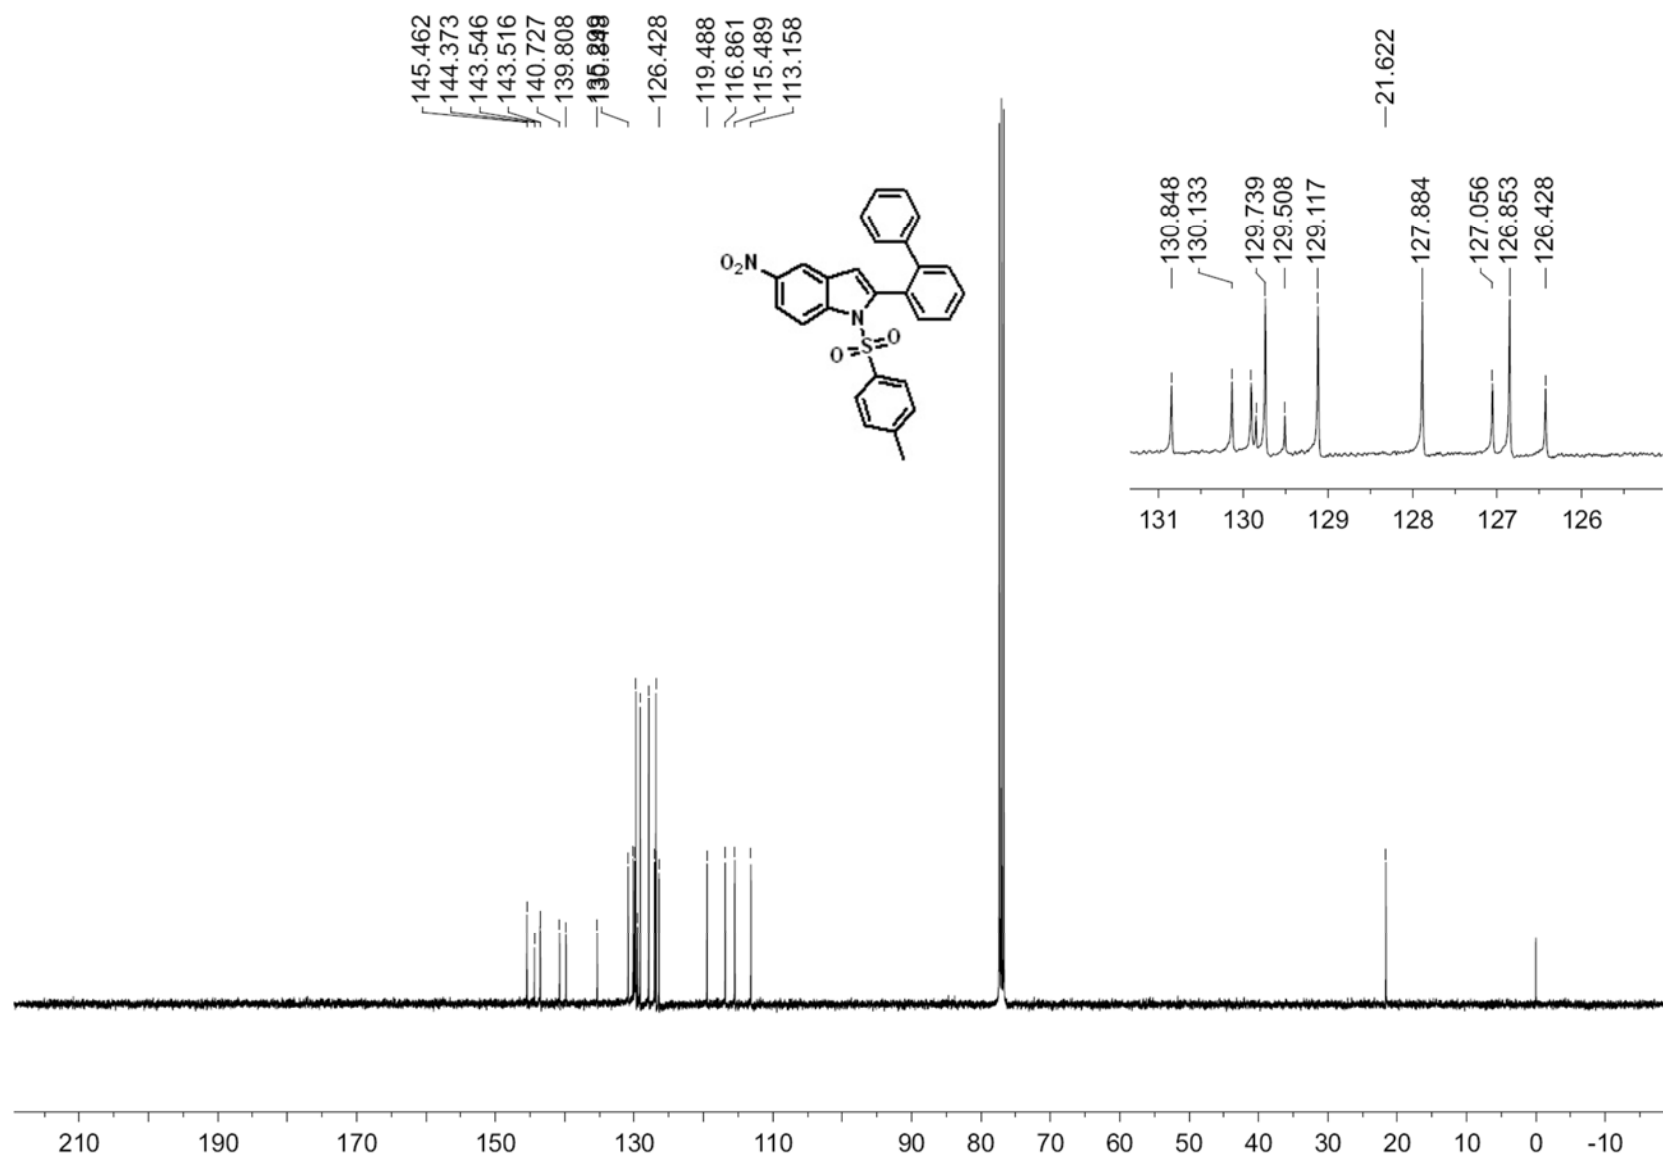

<sup>13</sup>C NMR Spectrum of Compound 2aa

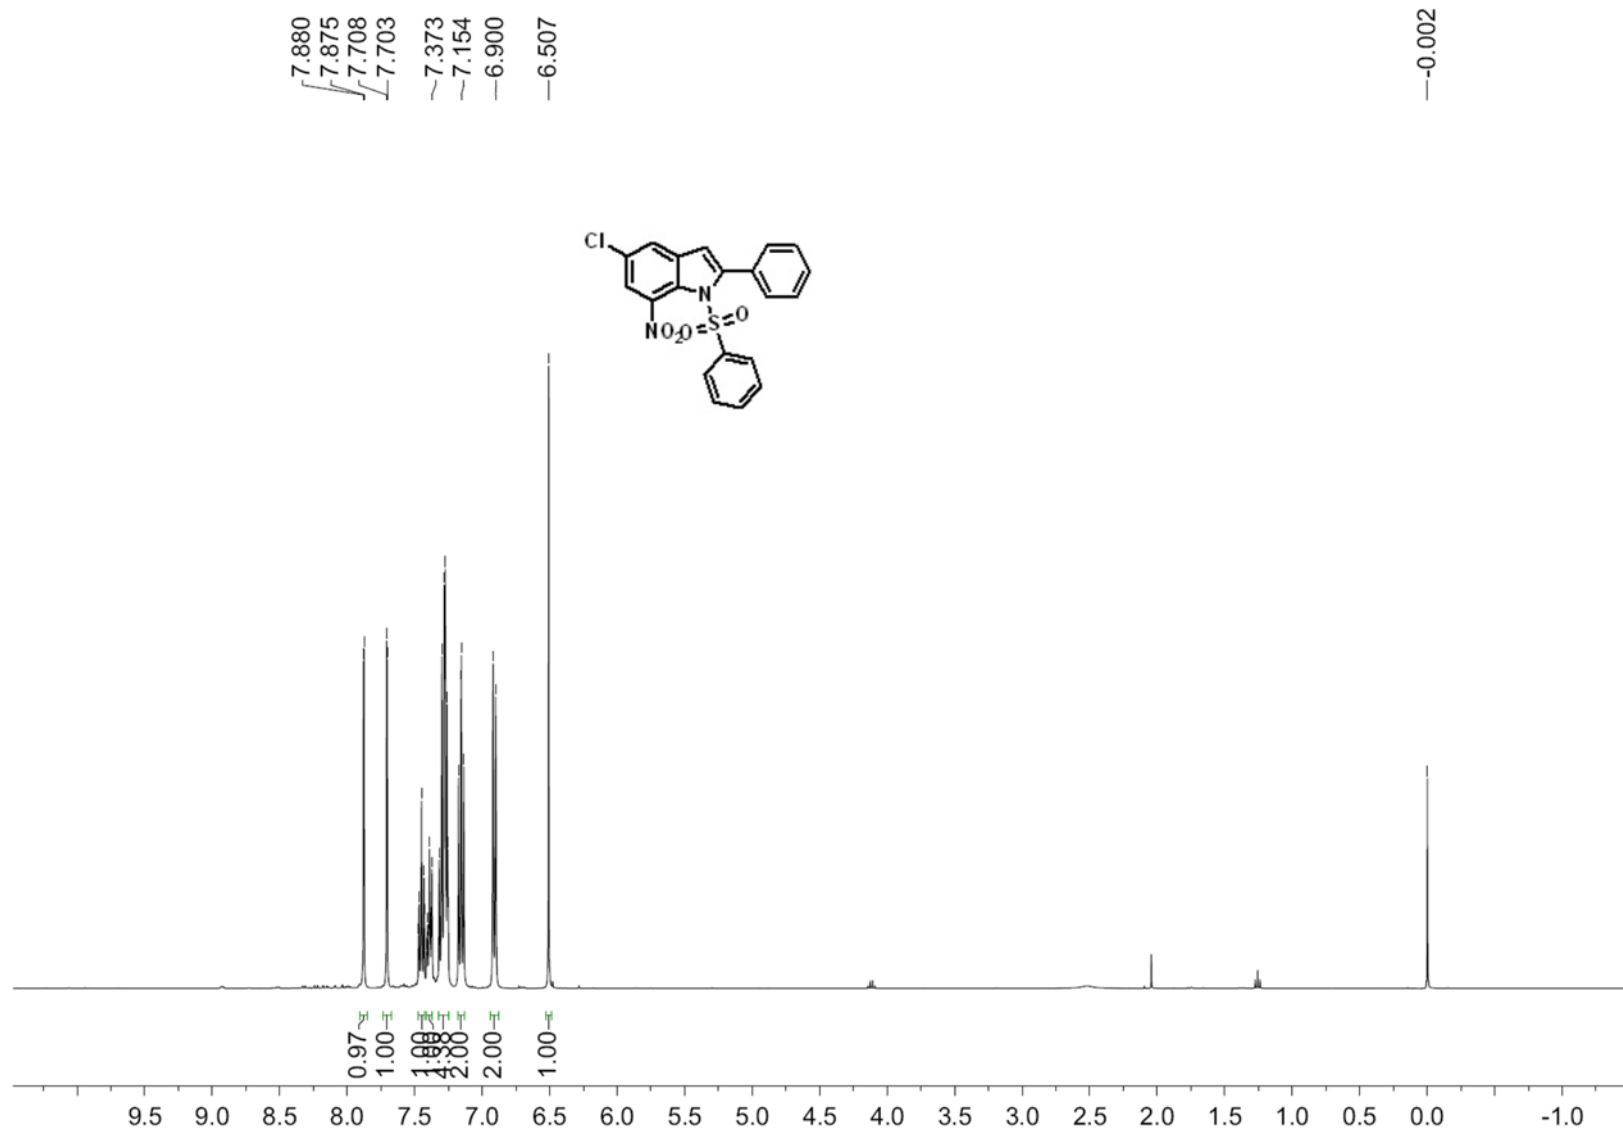

<sup>1</sup>H NMR Spectrum of Compound **2ac**

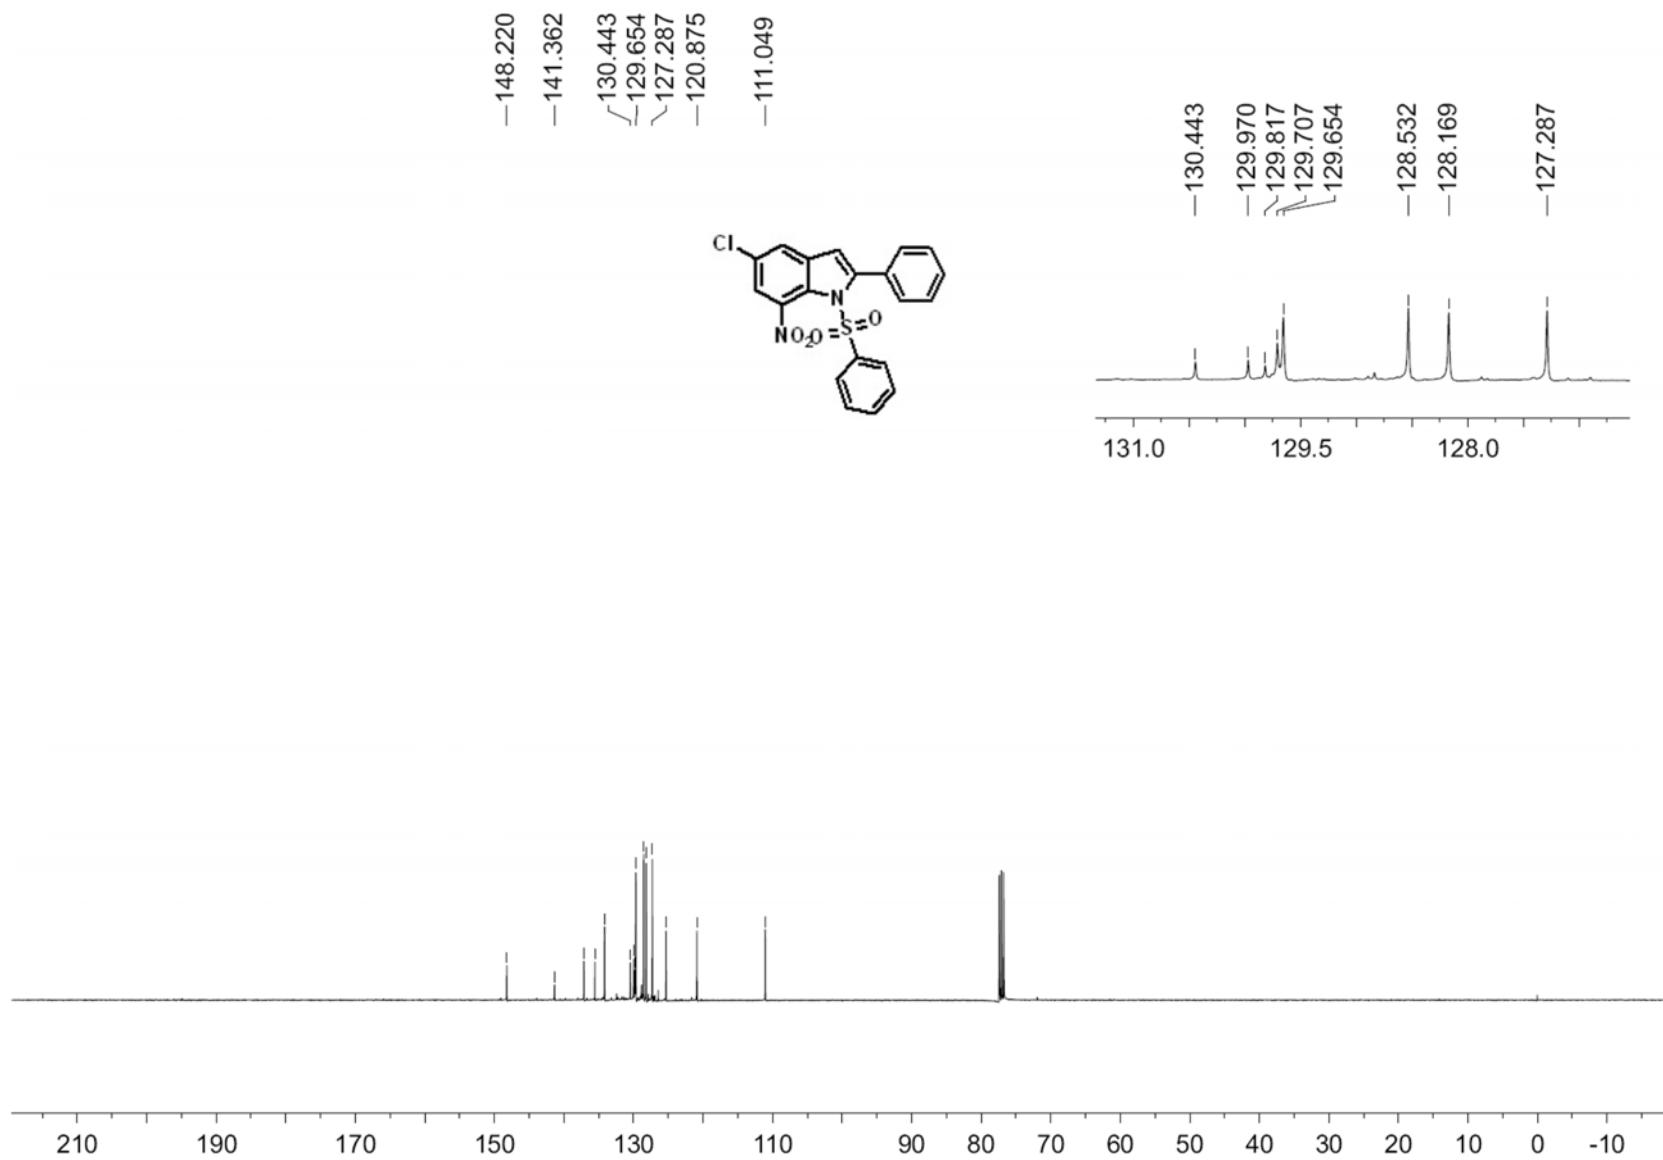

<sup>13</sup>C NMR Spectrum of Compound **2ac**

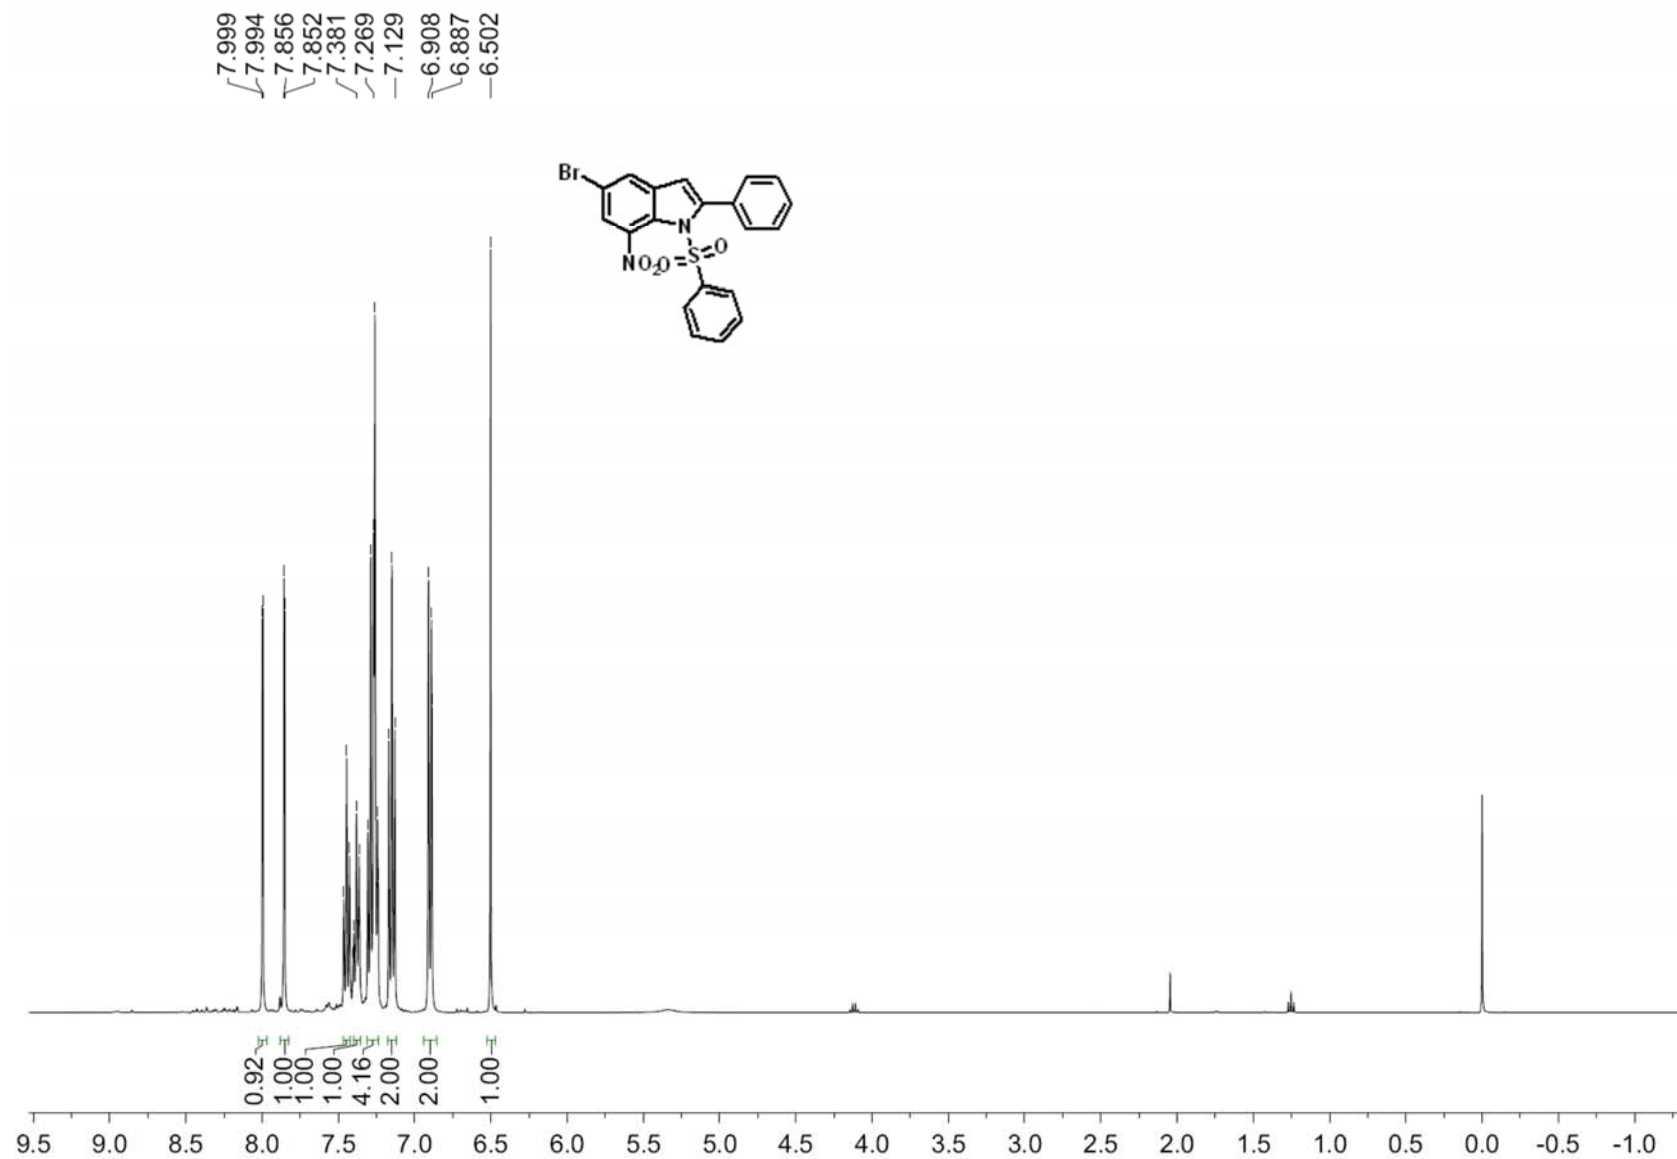

<sup>1</sup>H NMR Spectrum of Compound **2ad**

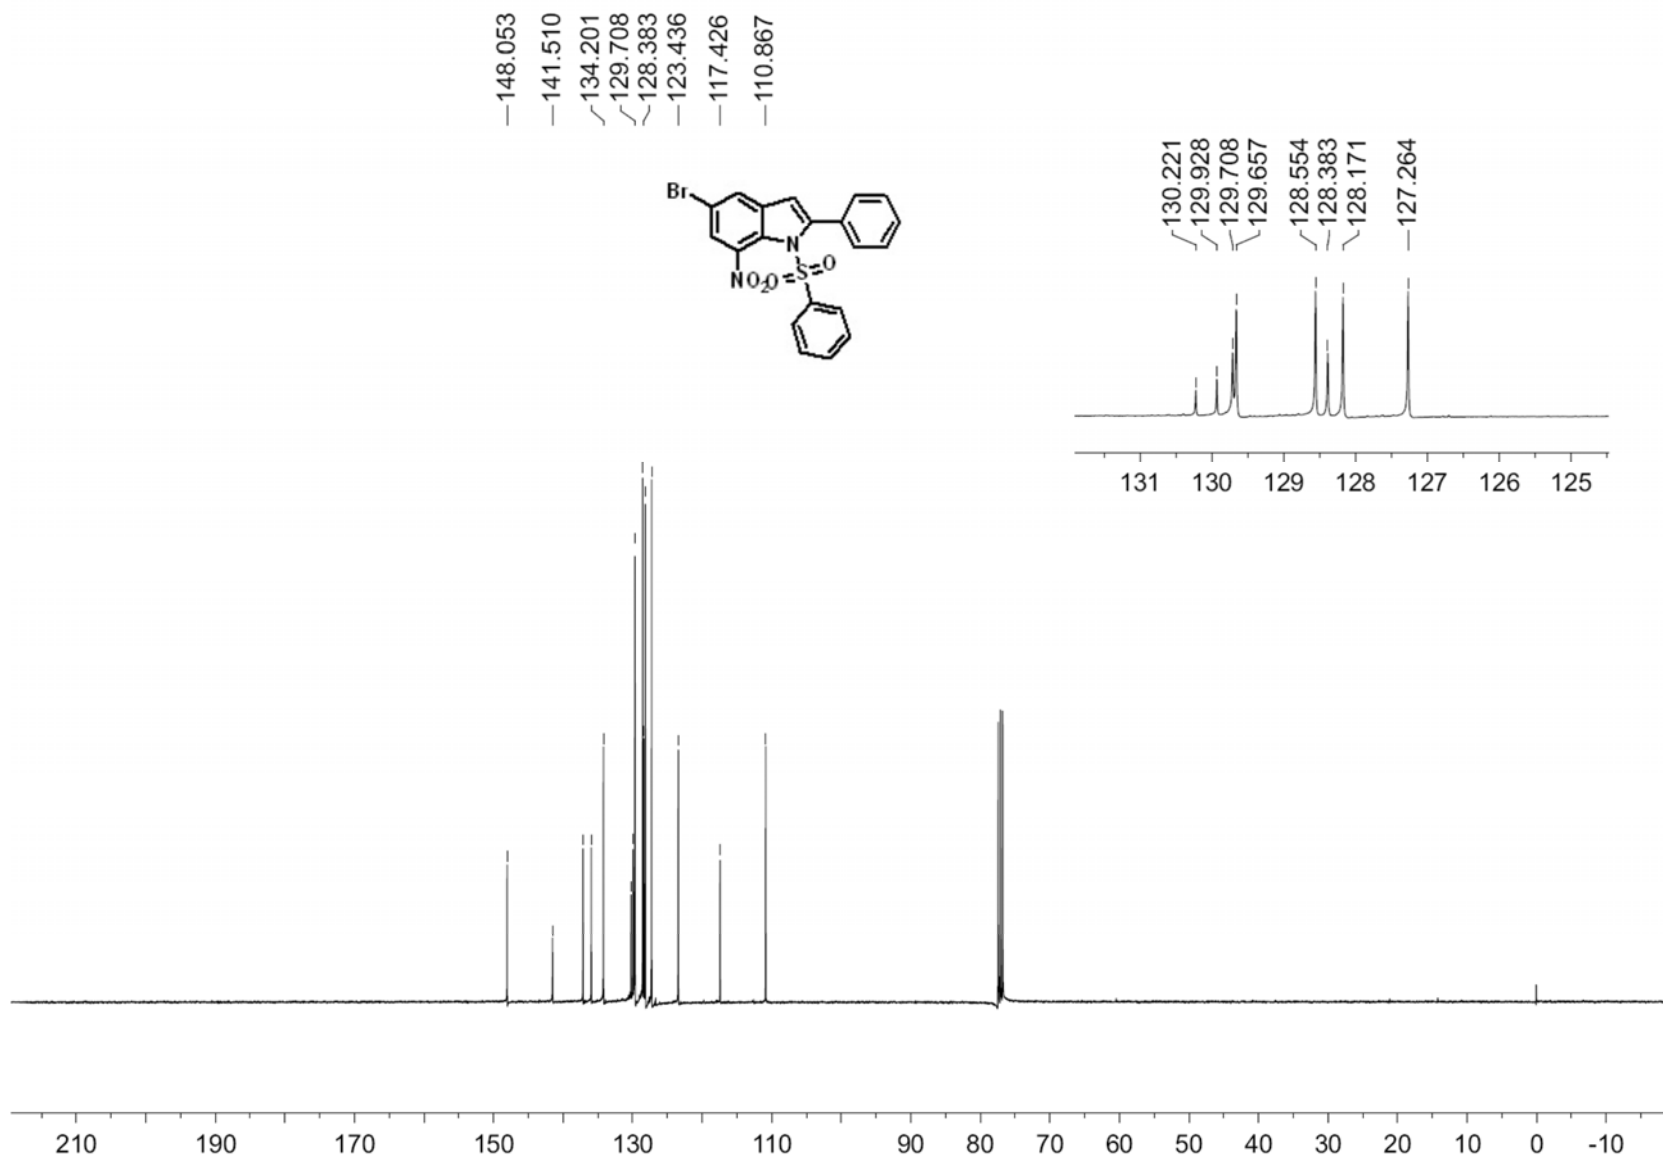

<sup>13</sup>C NMR Spectrum of Compound **2ad**

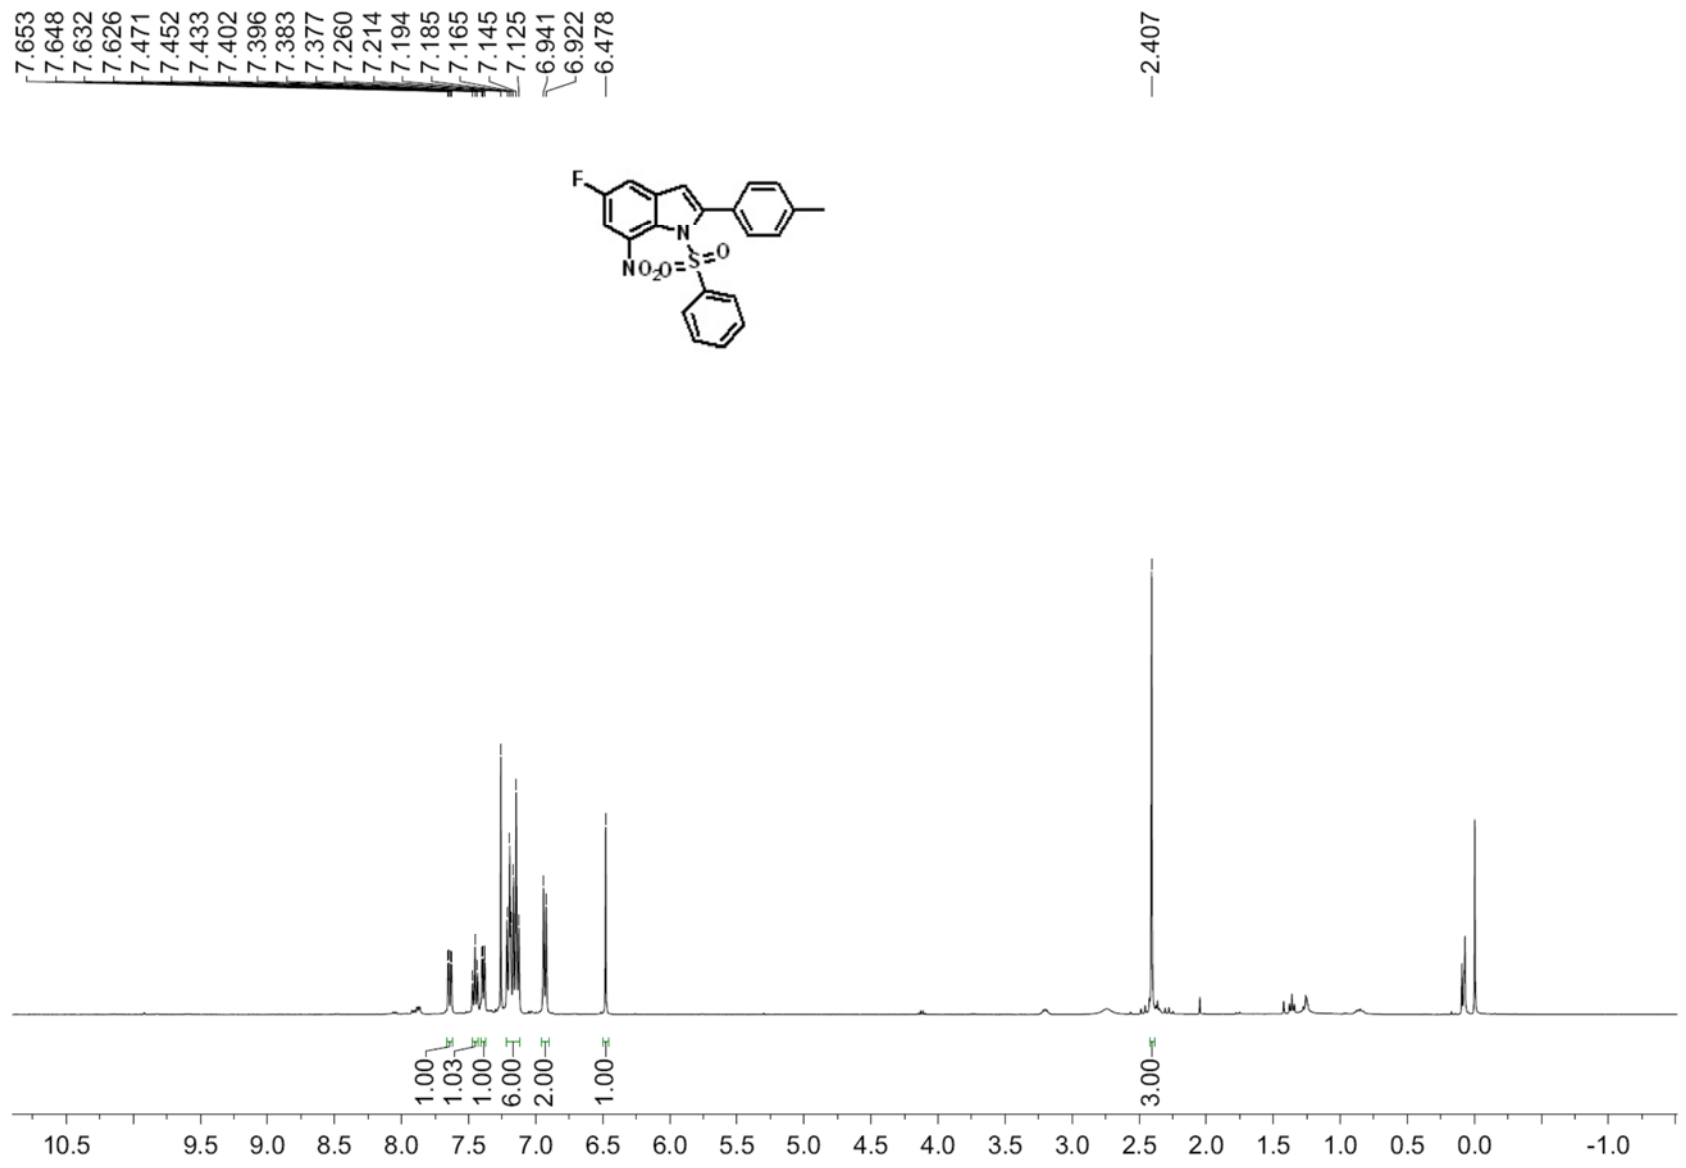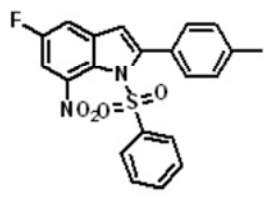

<sup>1</sup>H NMR Spectrum of Compound **2ae**

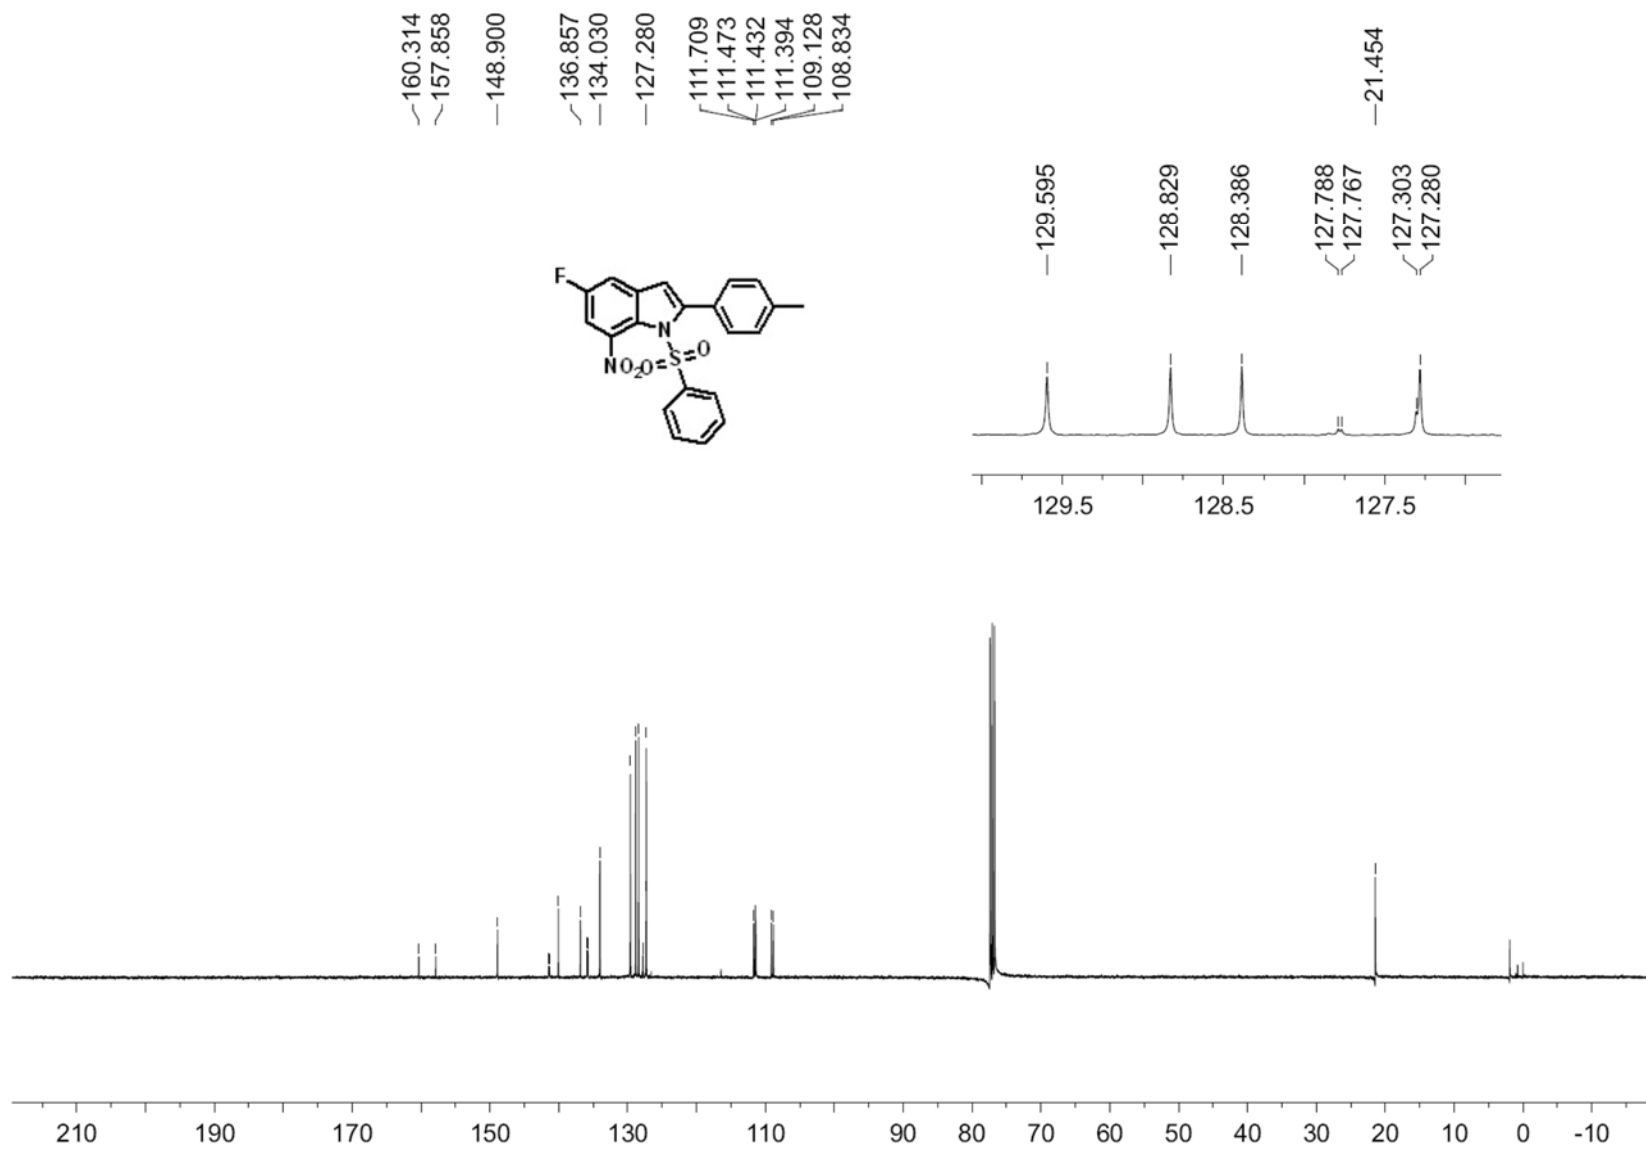

<sup>13</sup>C NMR Spectrum of Compound **2ae**

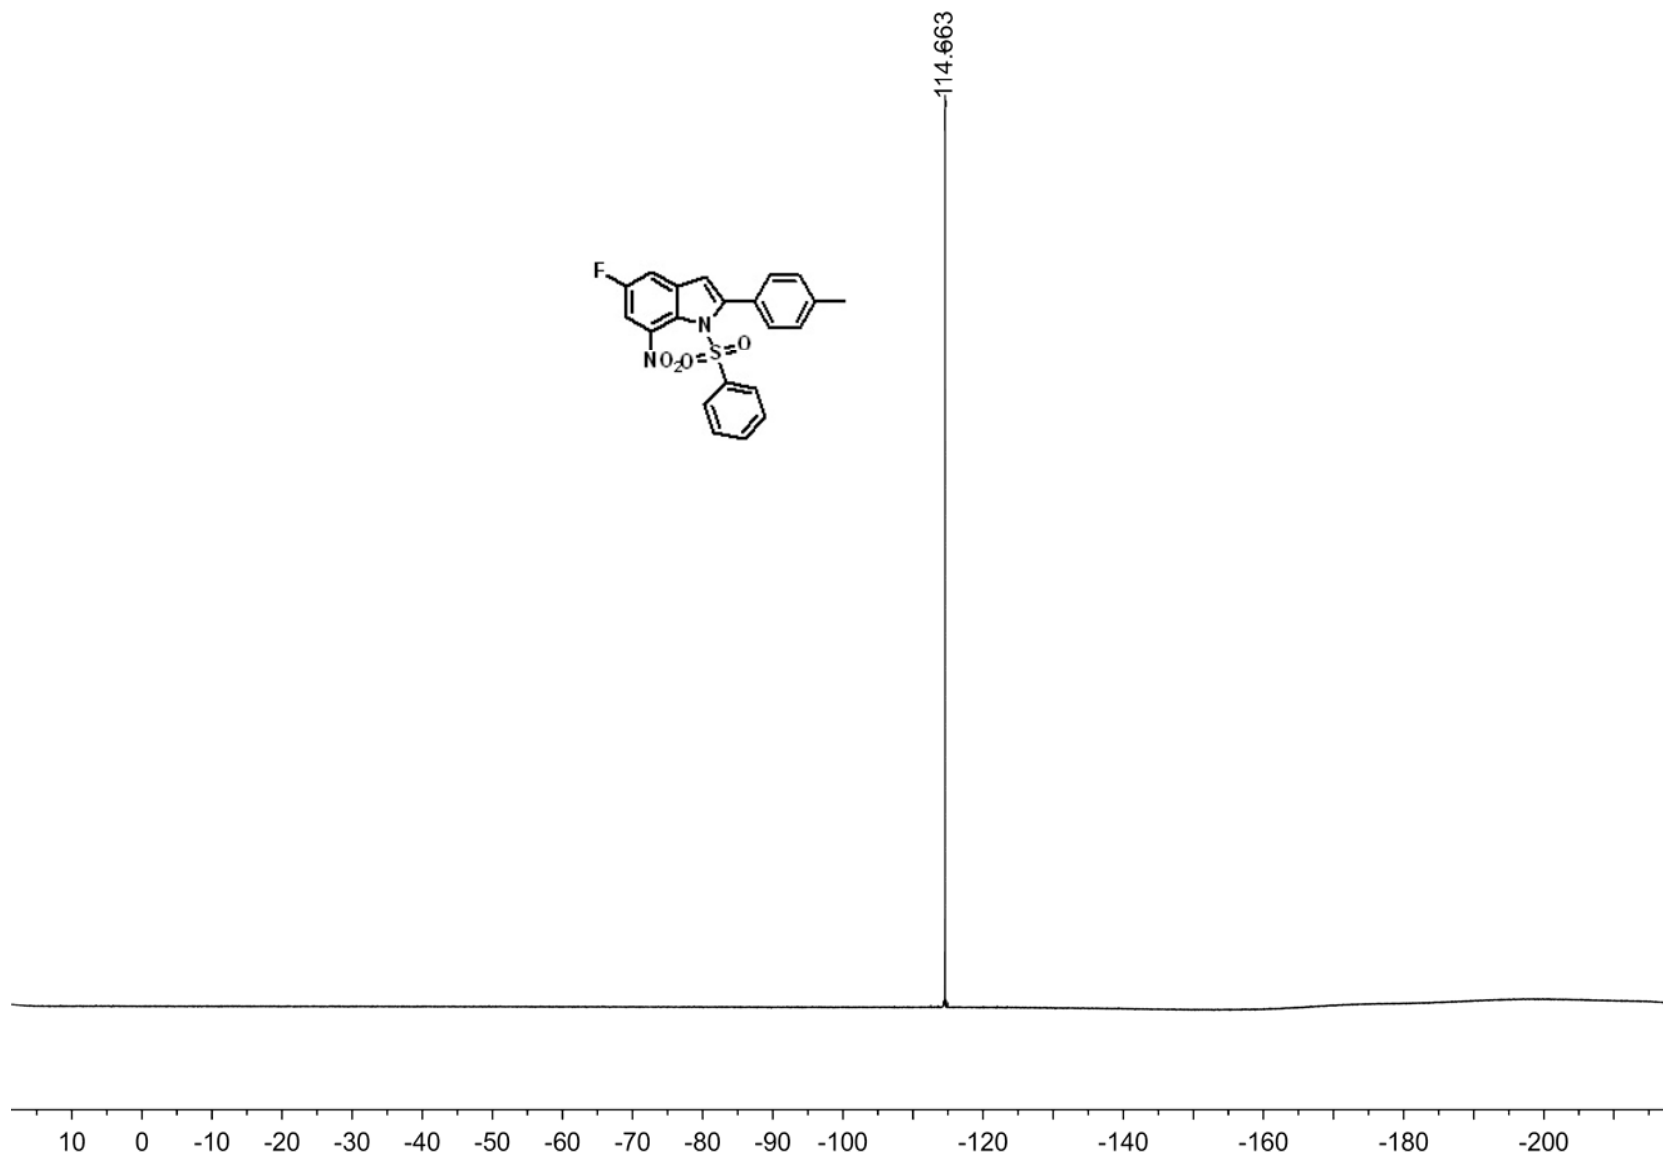

$^{19}\text{F}$  NMR Spectrum of Compound **2ae**



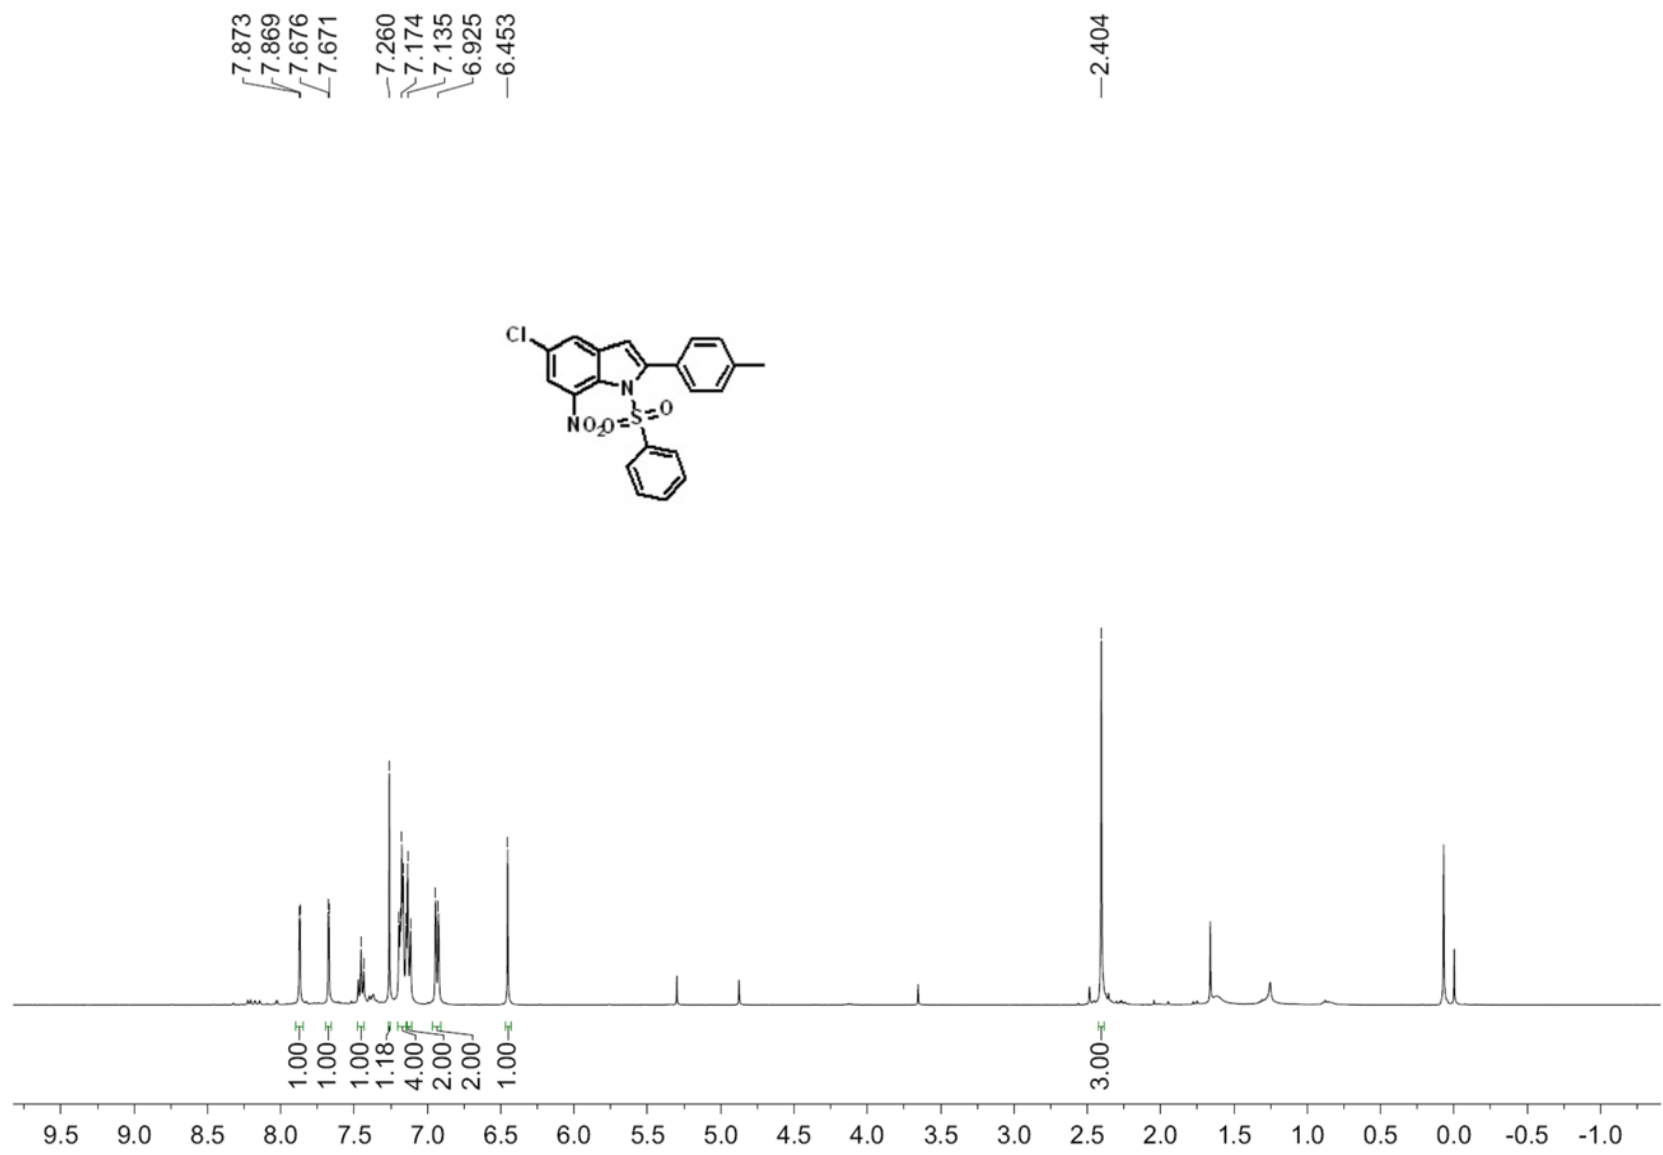

<sup>1</sup>H NMR Spectrum of Compound **2af**

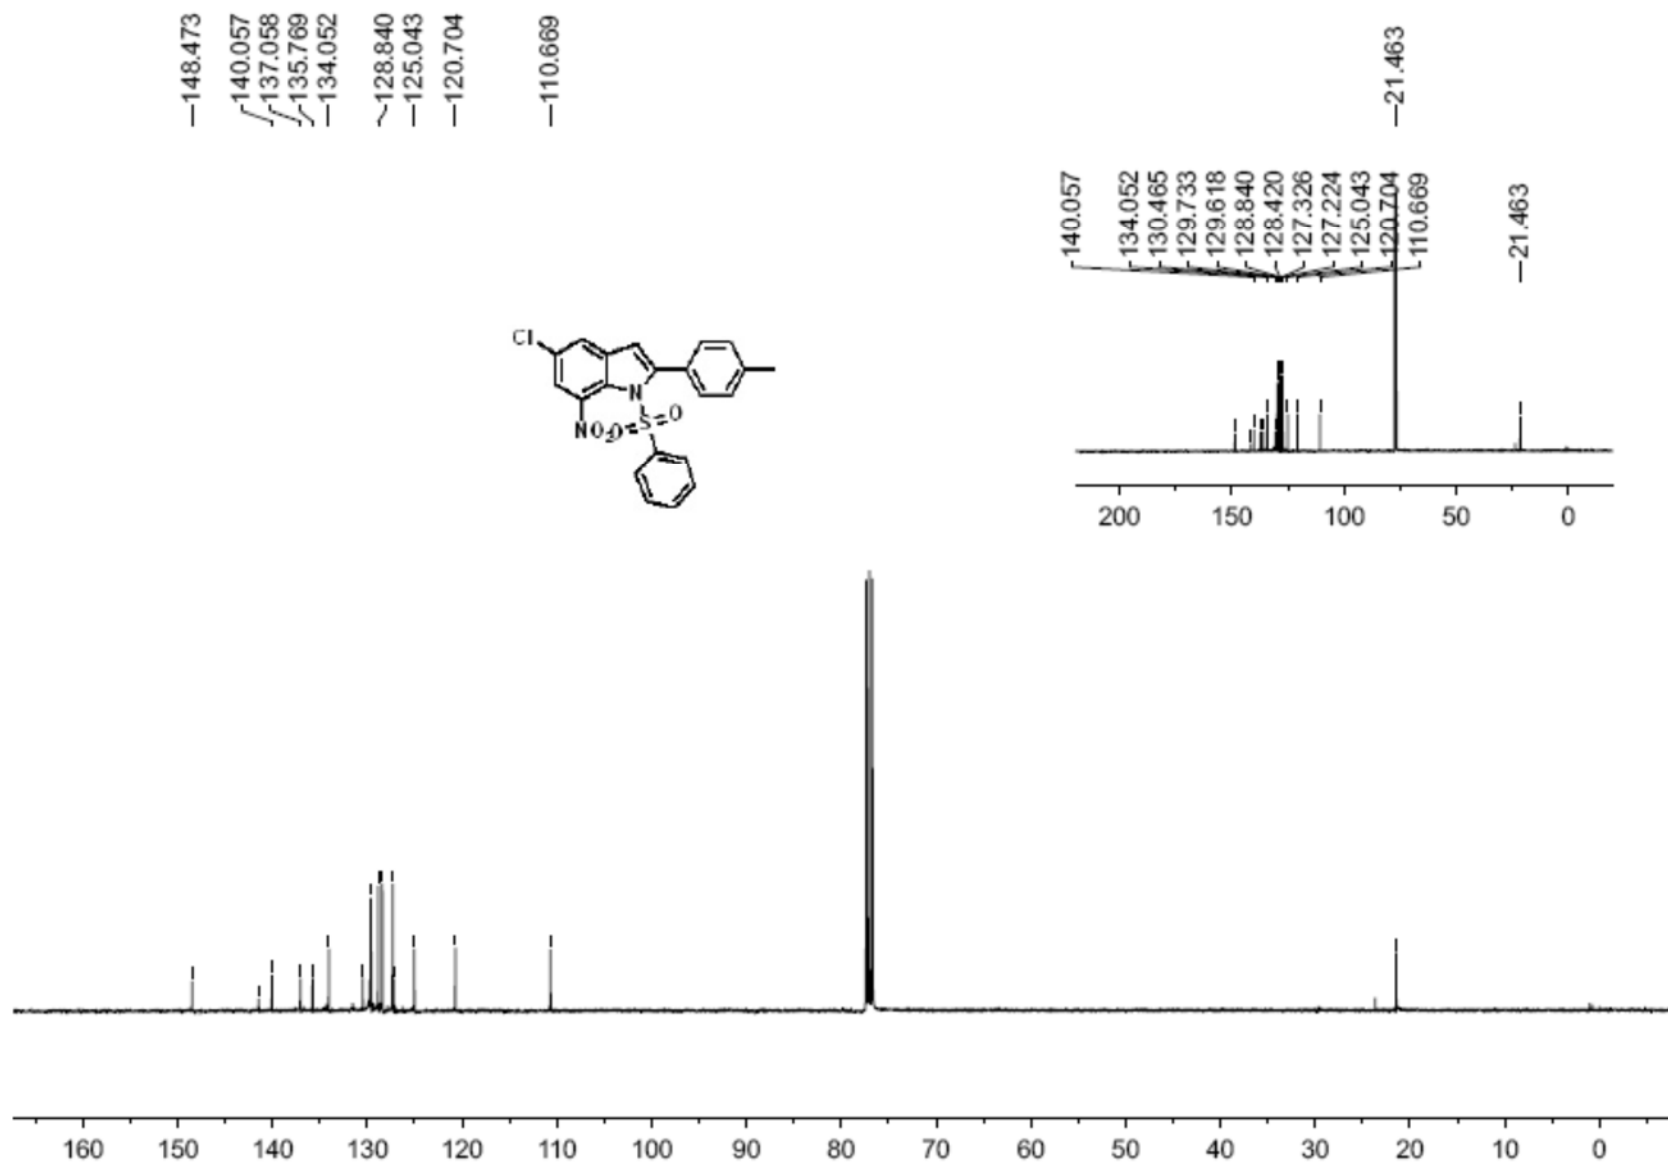

<sup>13</sup>C NMR Spectrum of Compound 2af

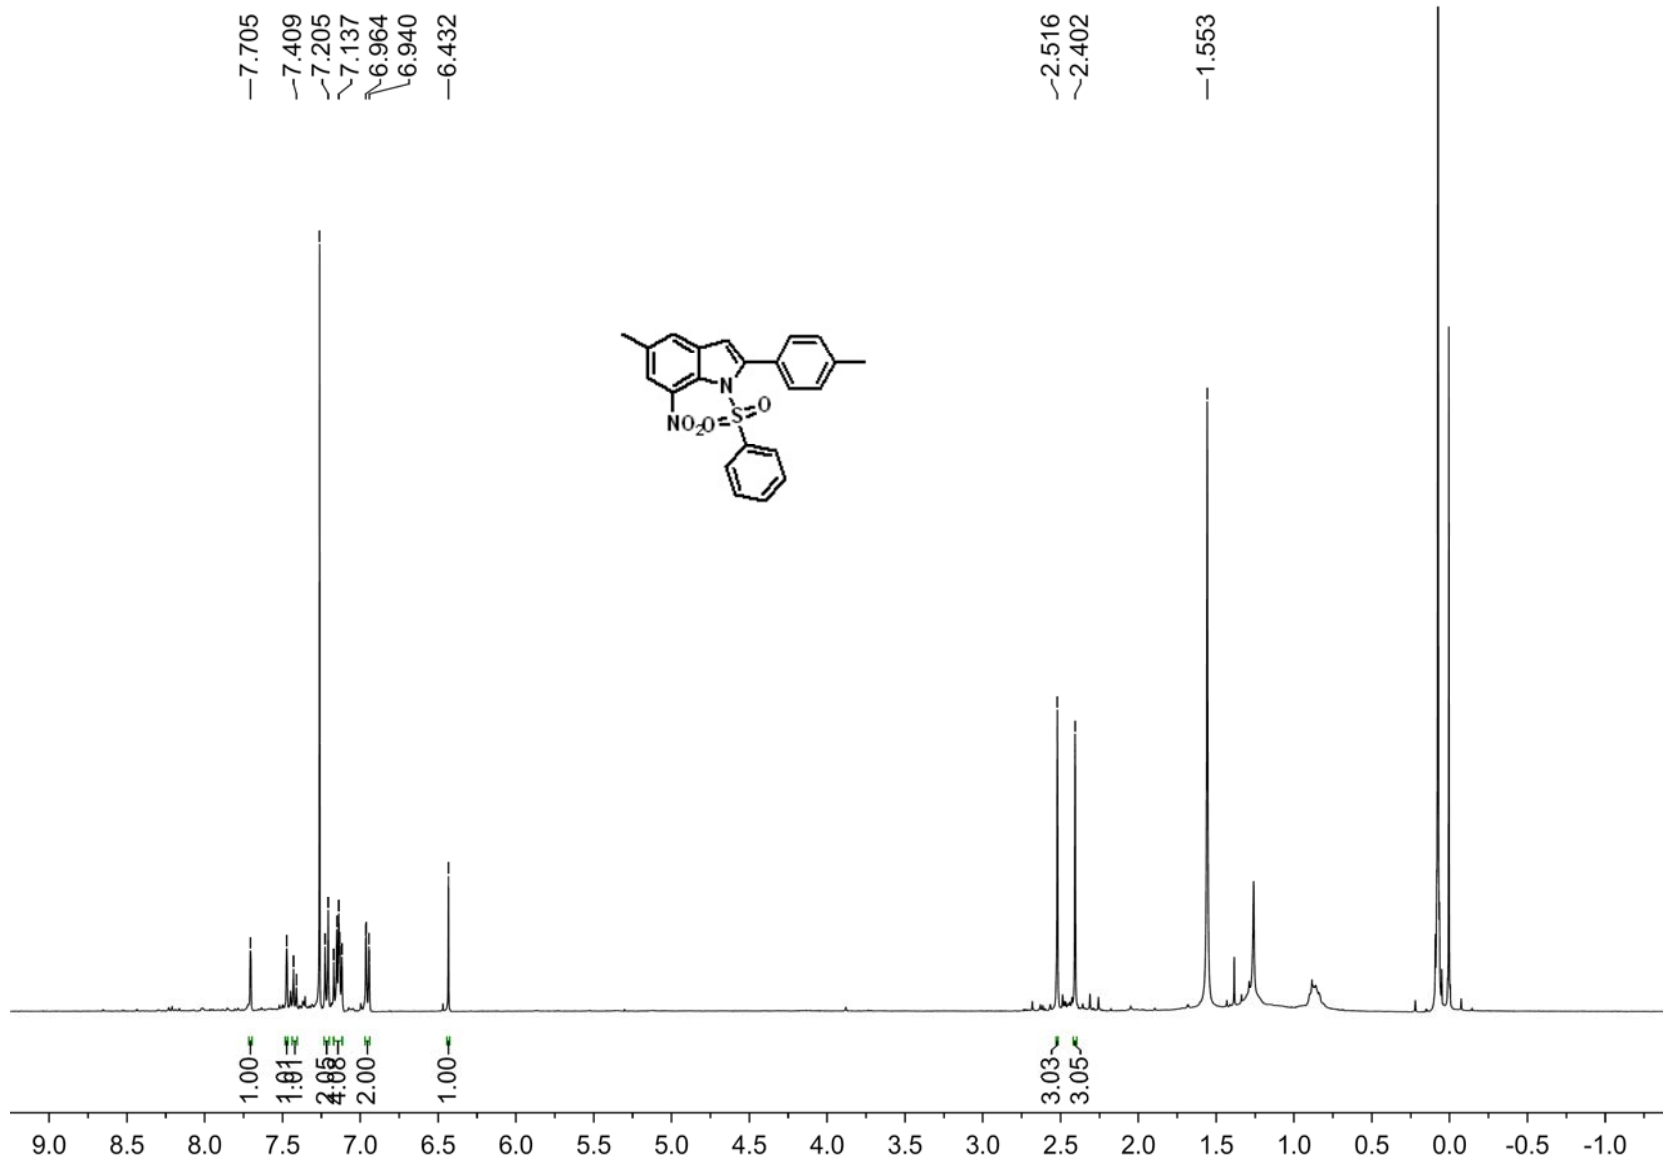

<sup>1</sup>H NMR Spectrum of Compound **2ag**

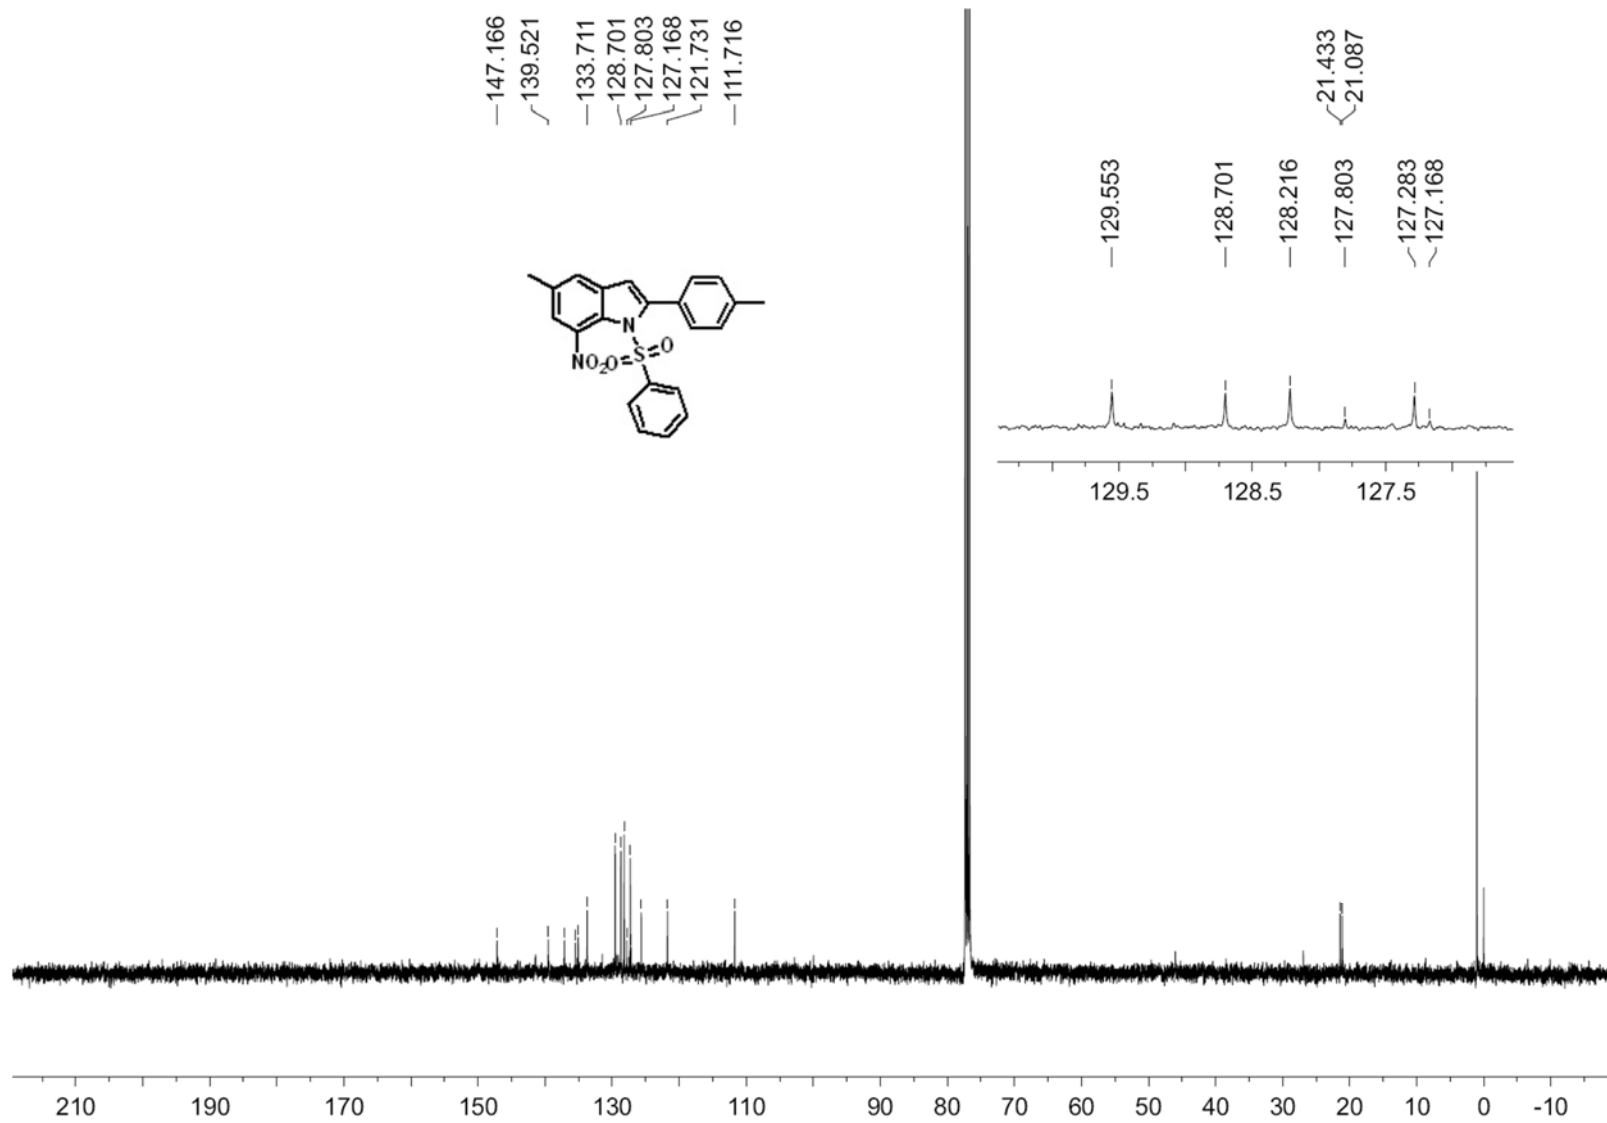

$^{13}\text{C}$  NMR Spectrum of Compound **2ag**

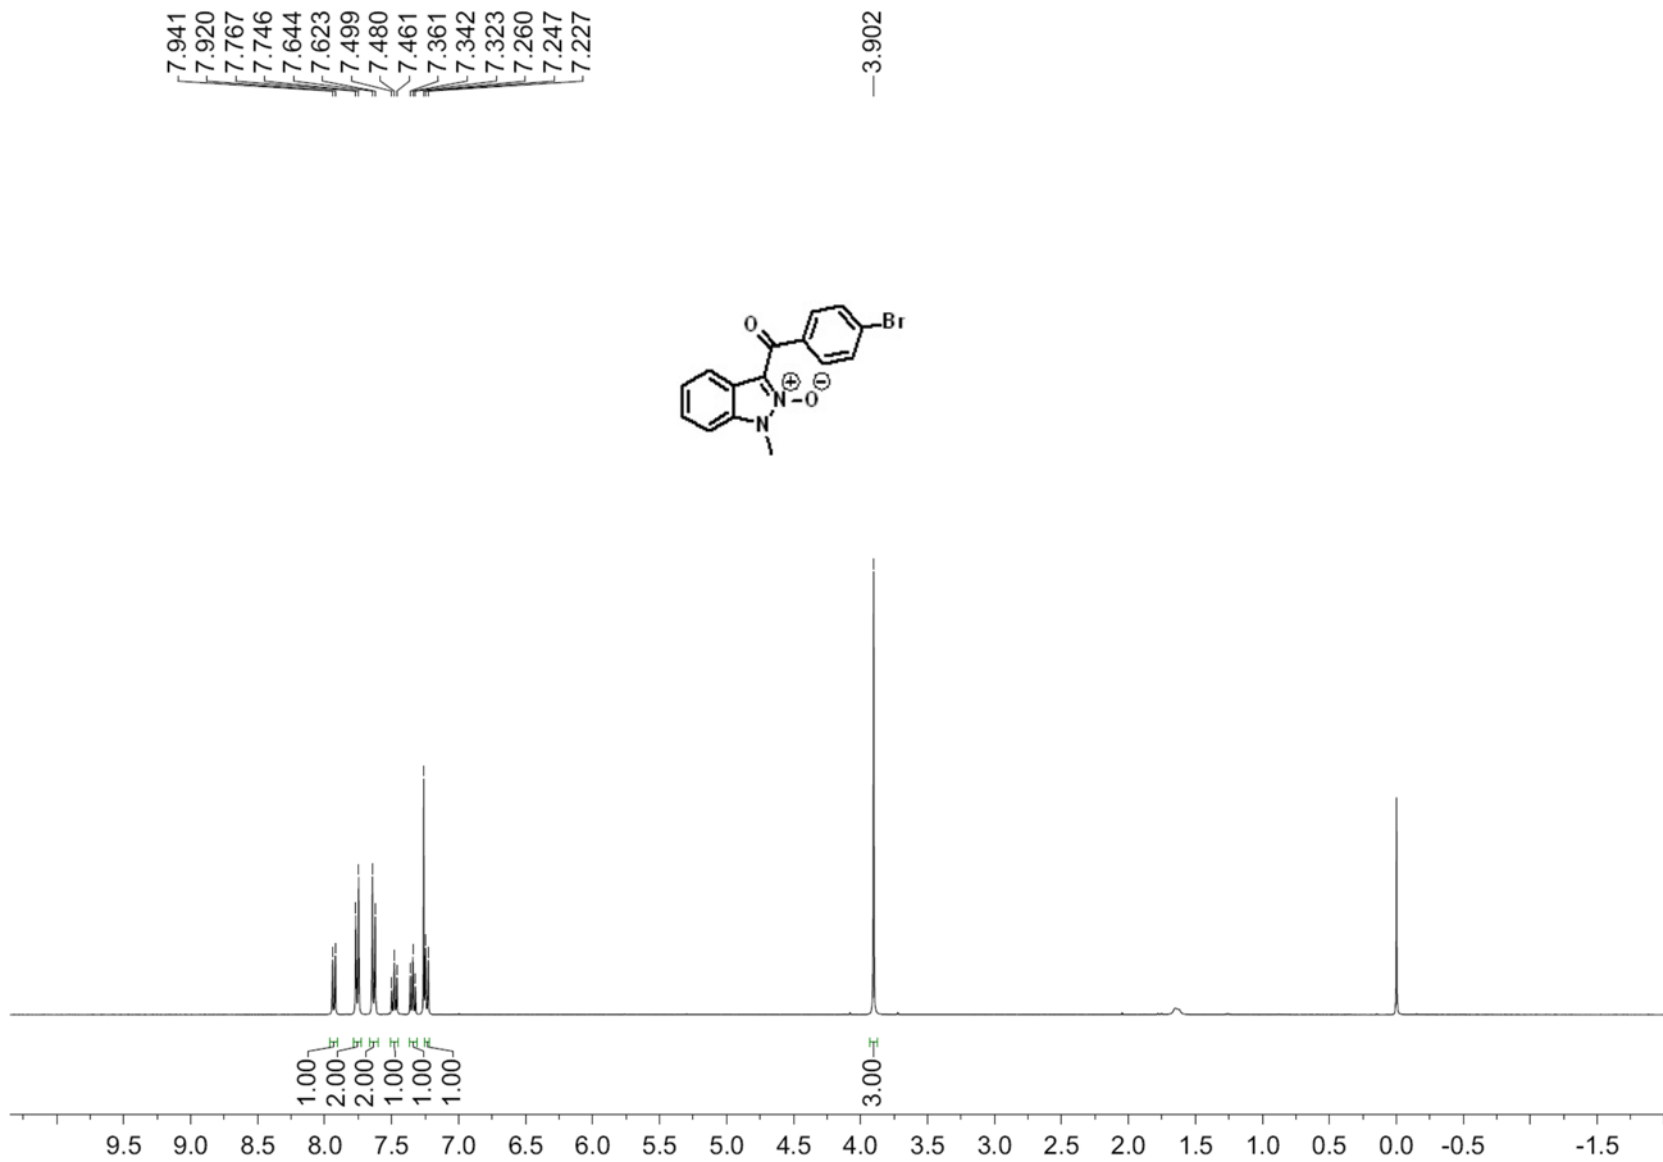

<sup>1</sup>H NMR Spectrum of Compound 3a

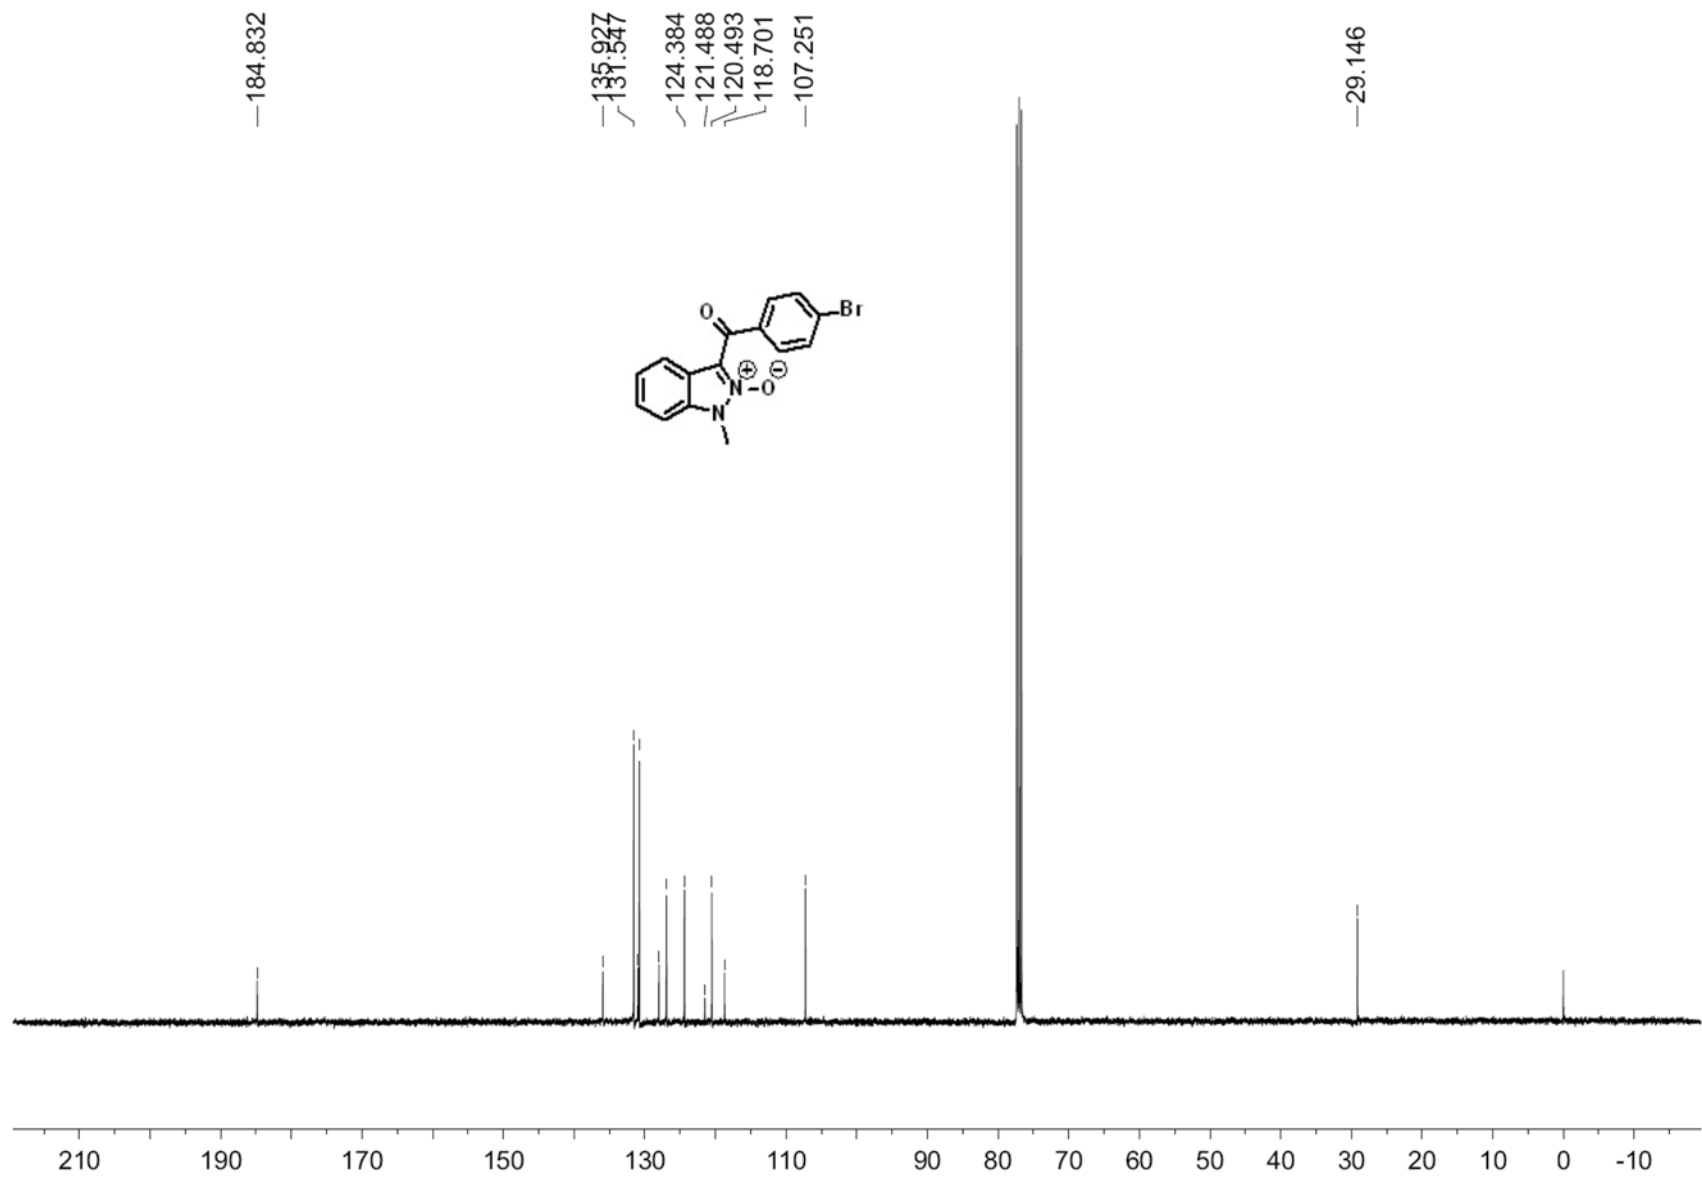

<sup>13</sup>C NMR Spectrum of Compound 3a

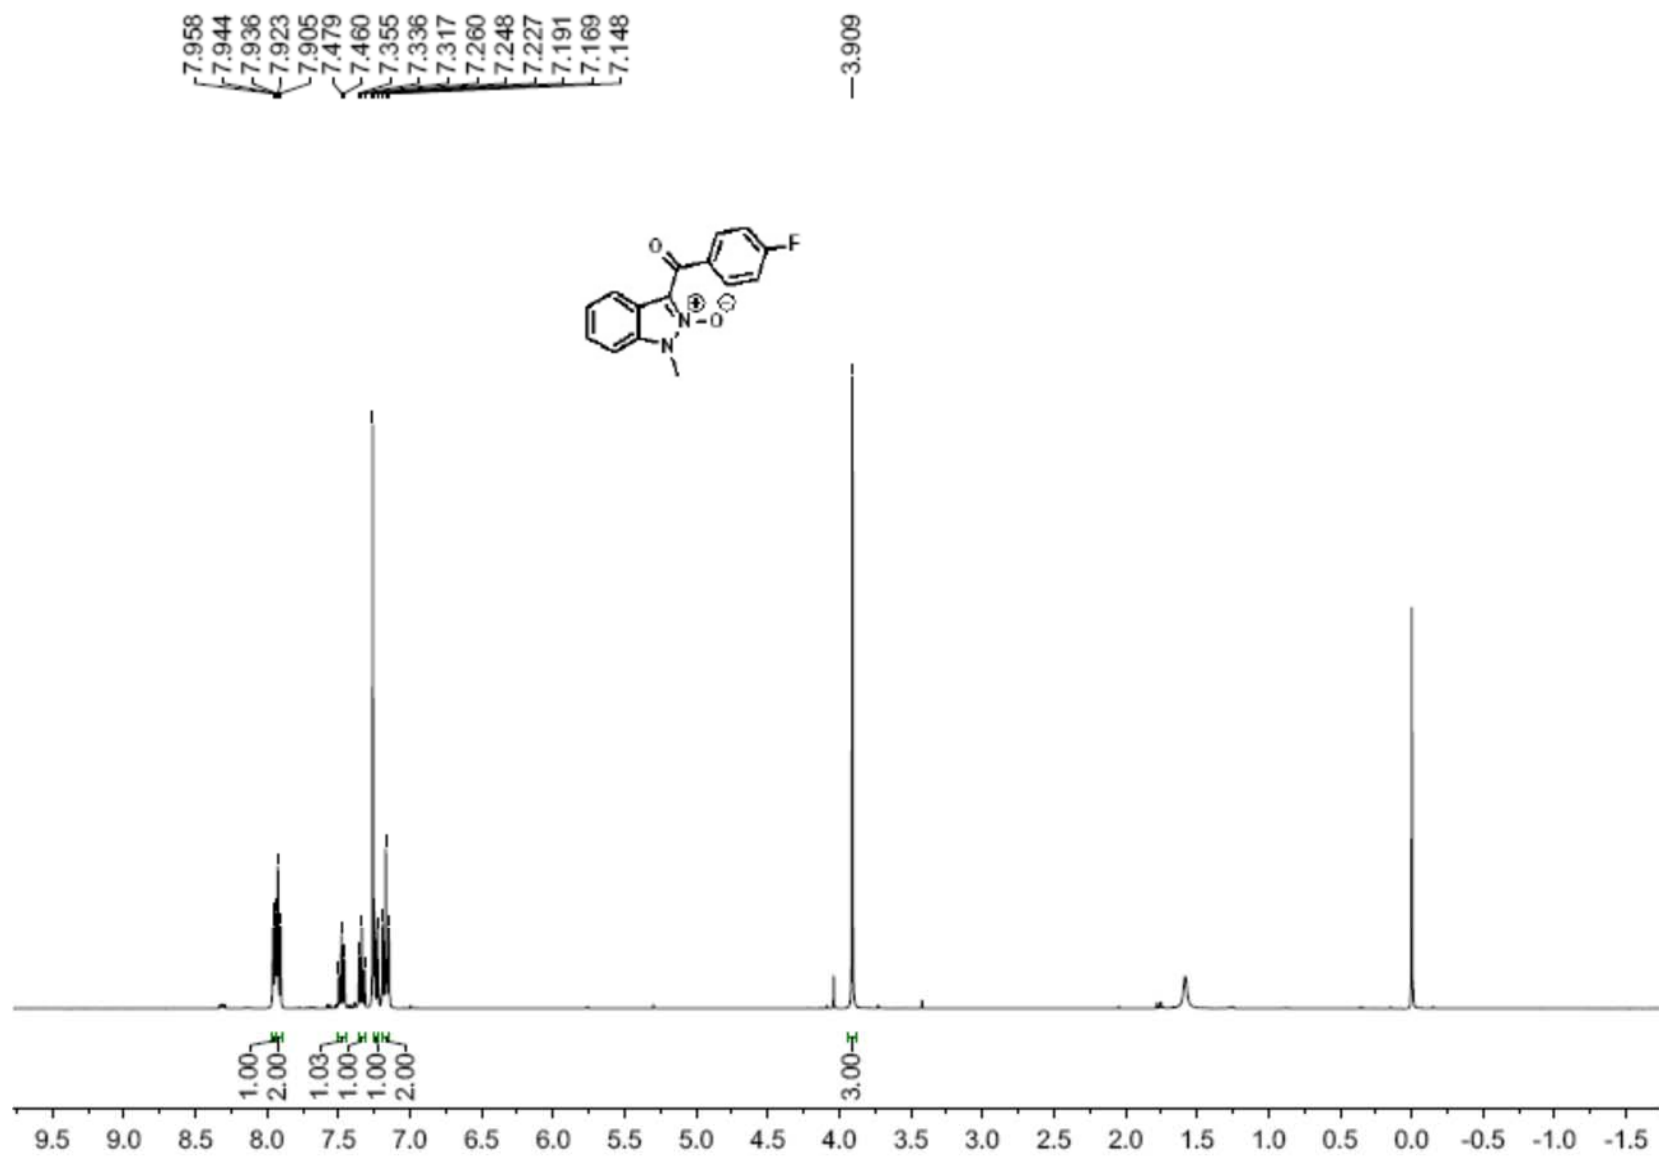

<sup>1</sup>H NMR Spectrum of Compound **3b**

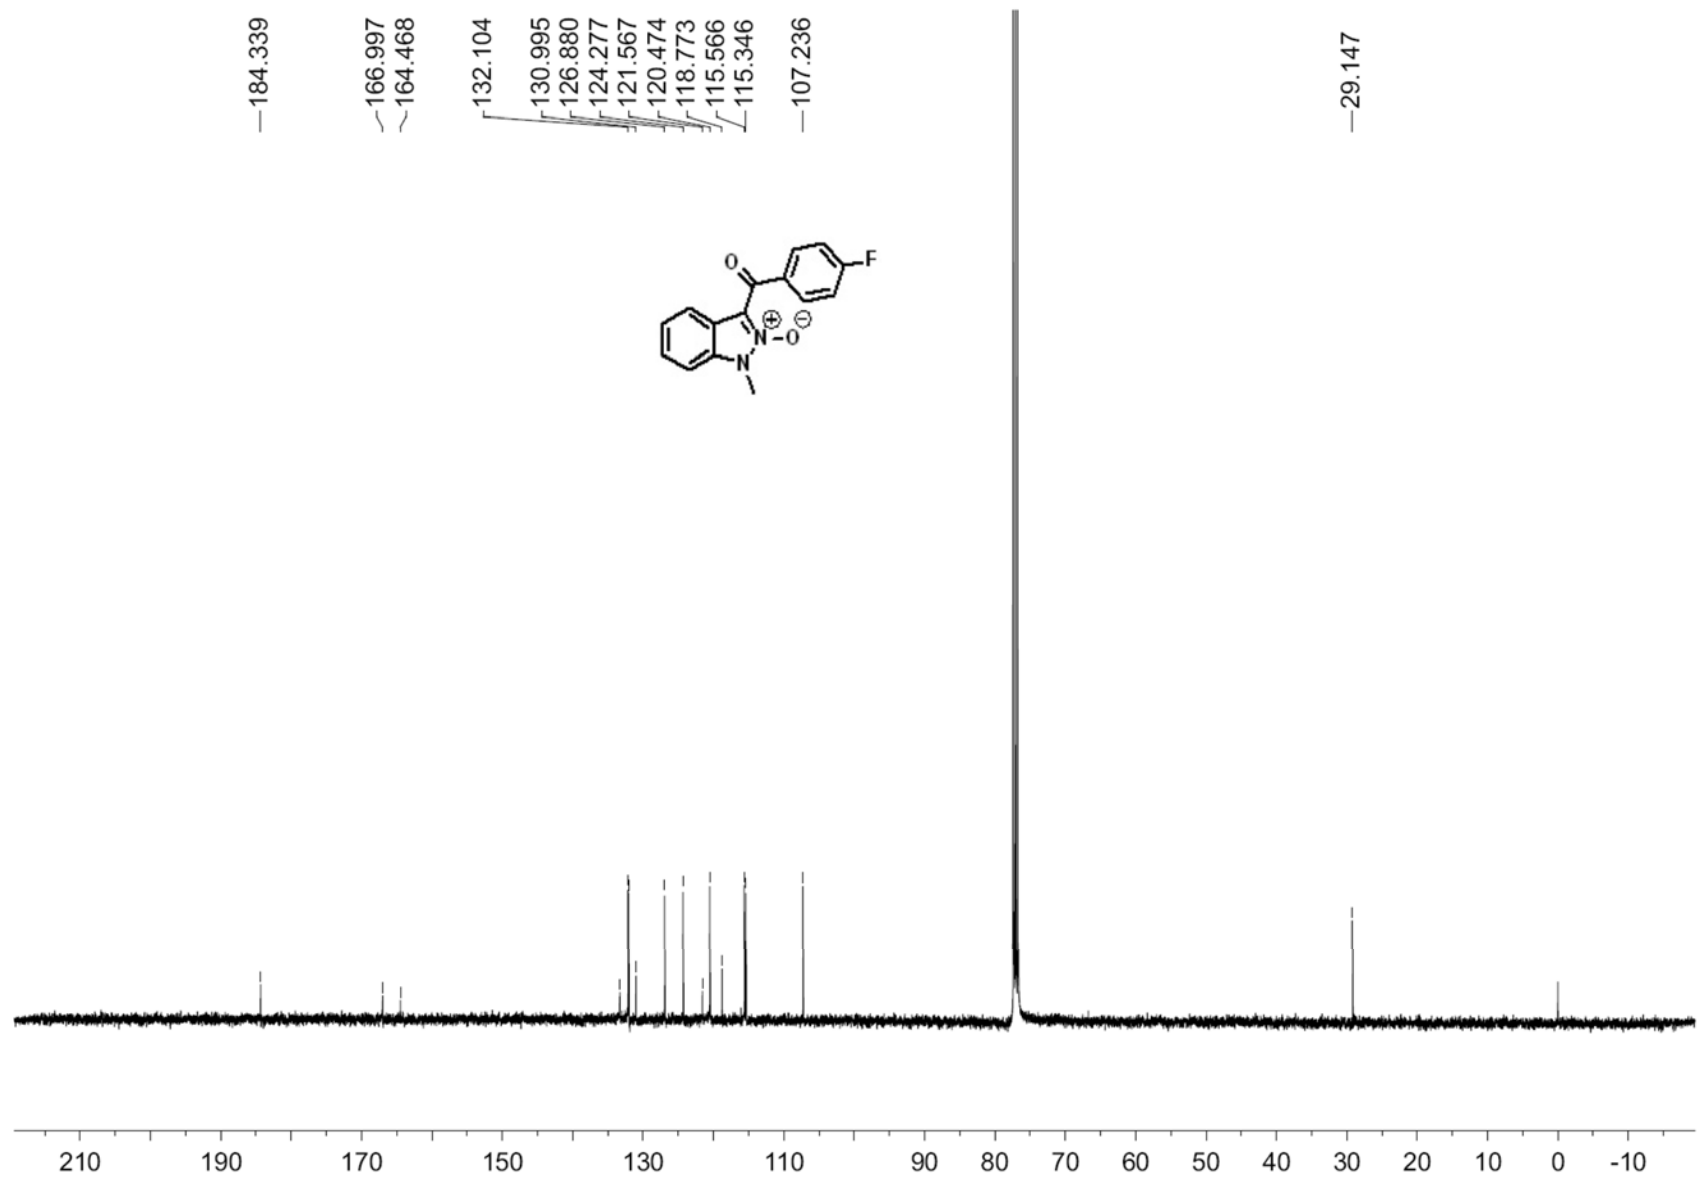

<sup>13</sup>C NMR Spectrum of Compound 3b



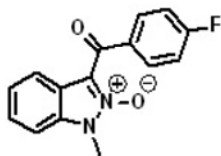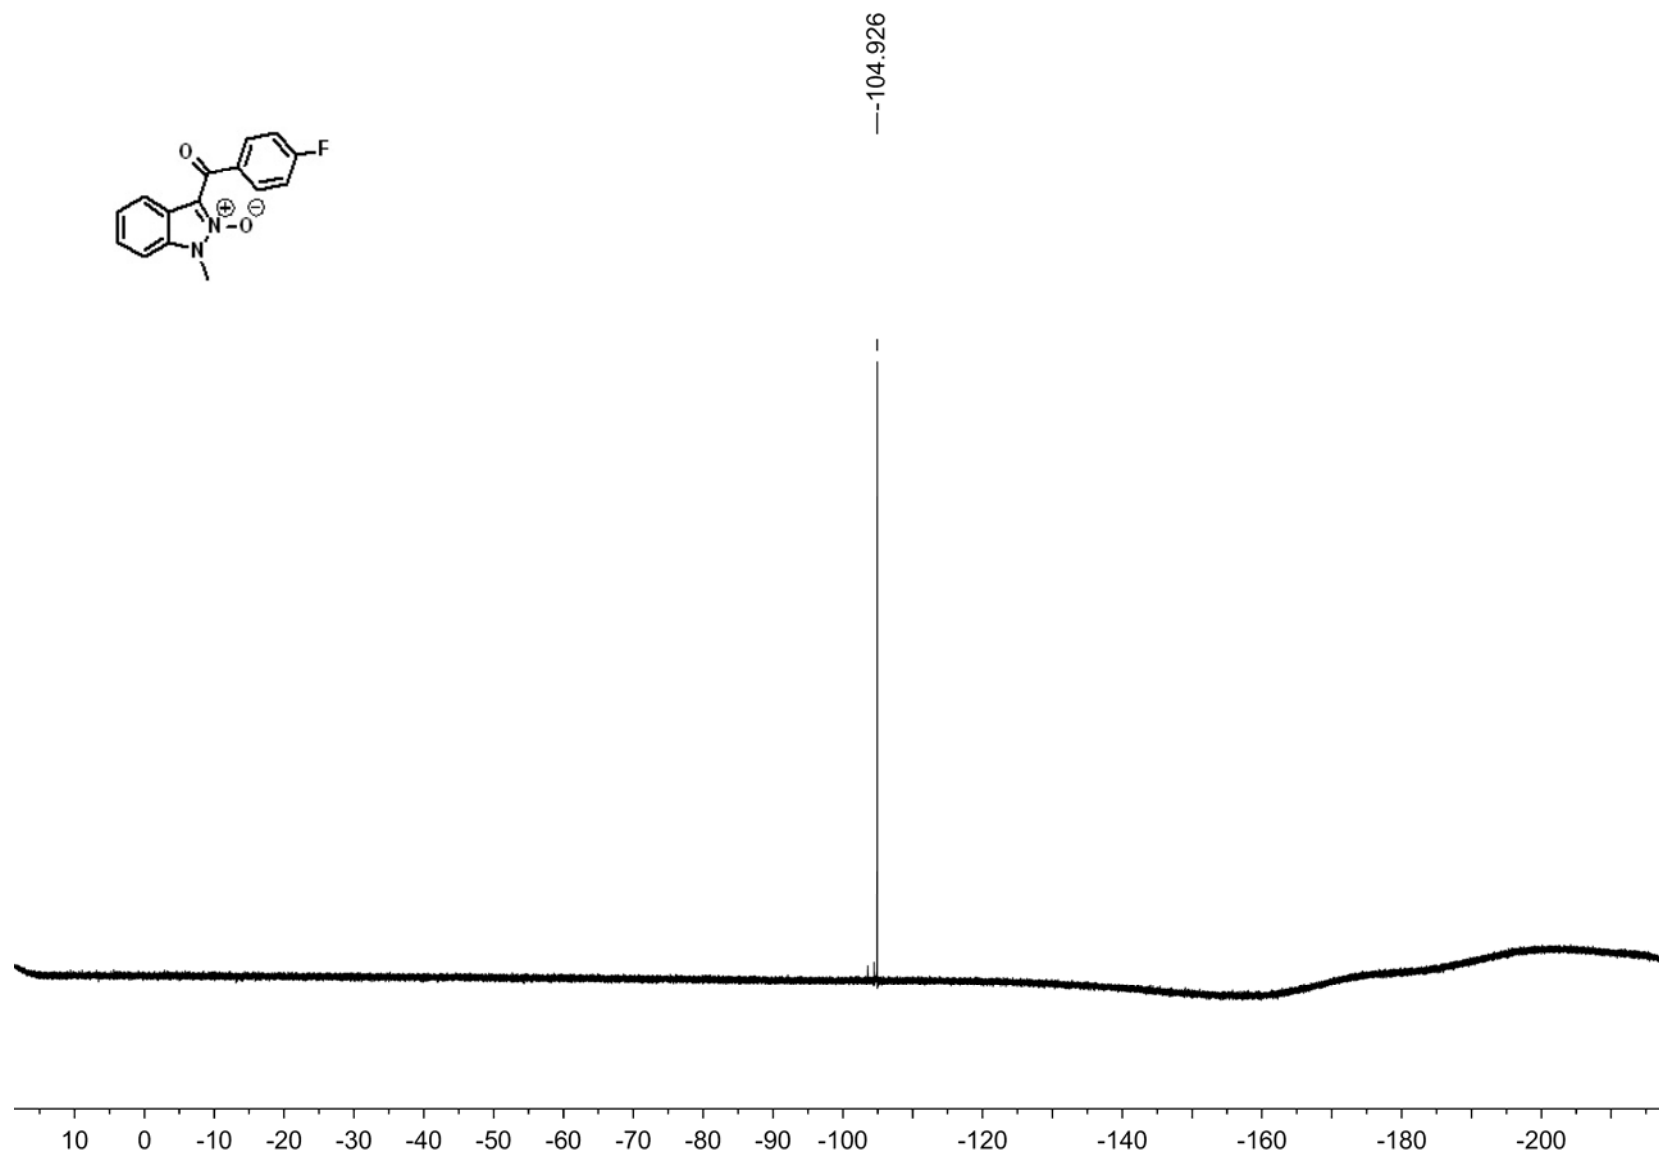

$^{19}\text{F}$  NMR Spectrum of Compound 3b

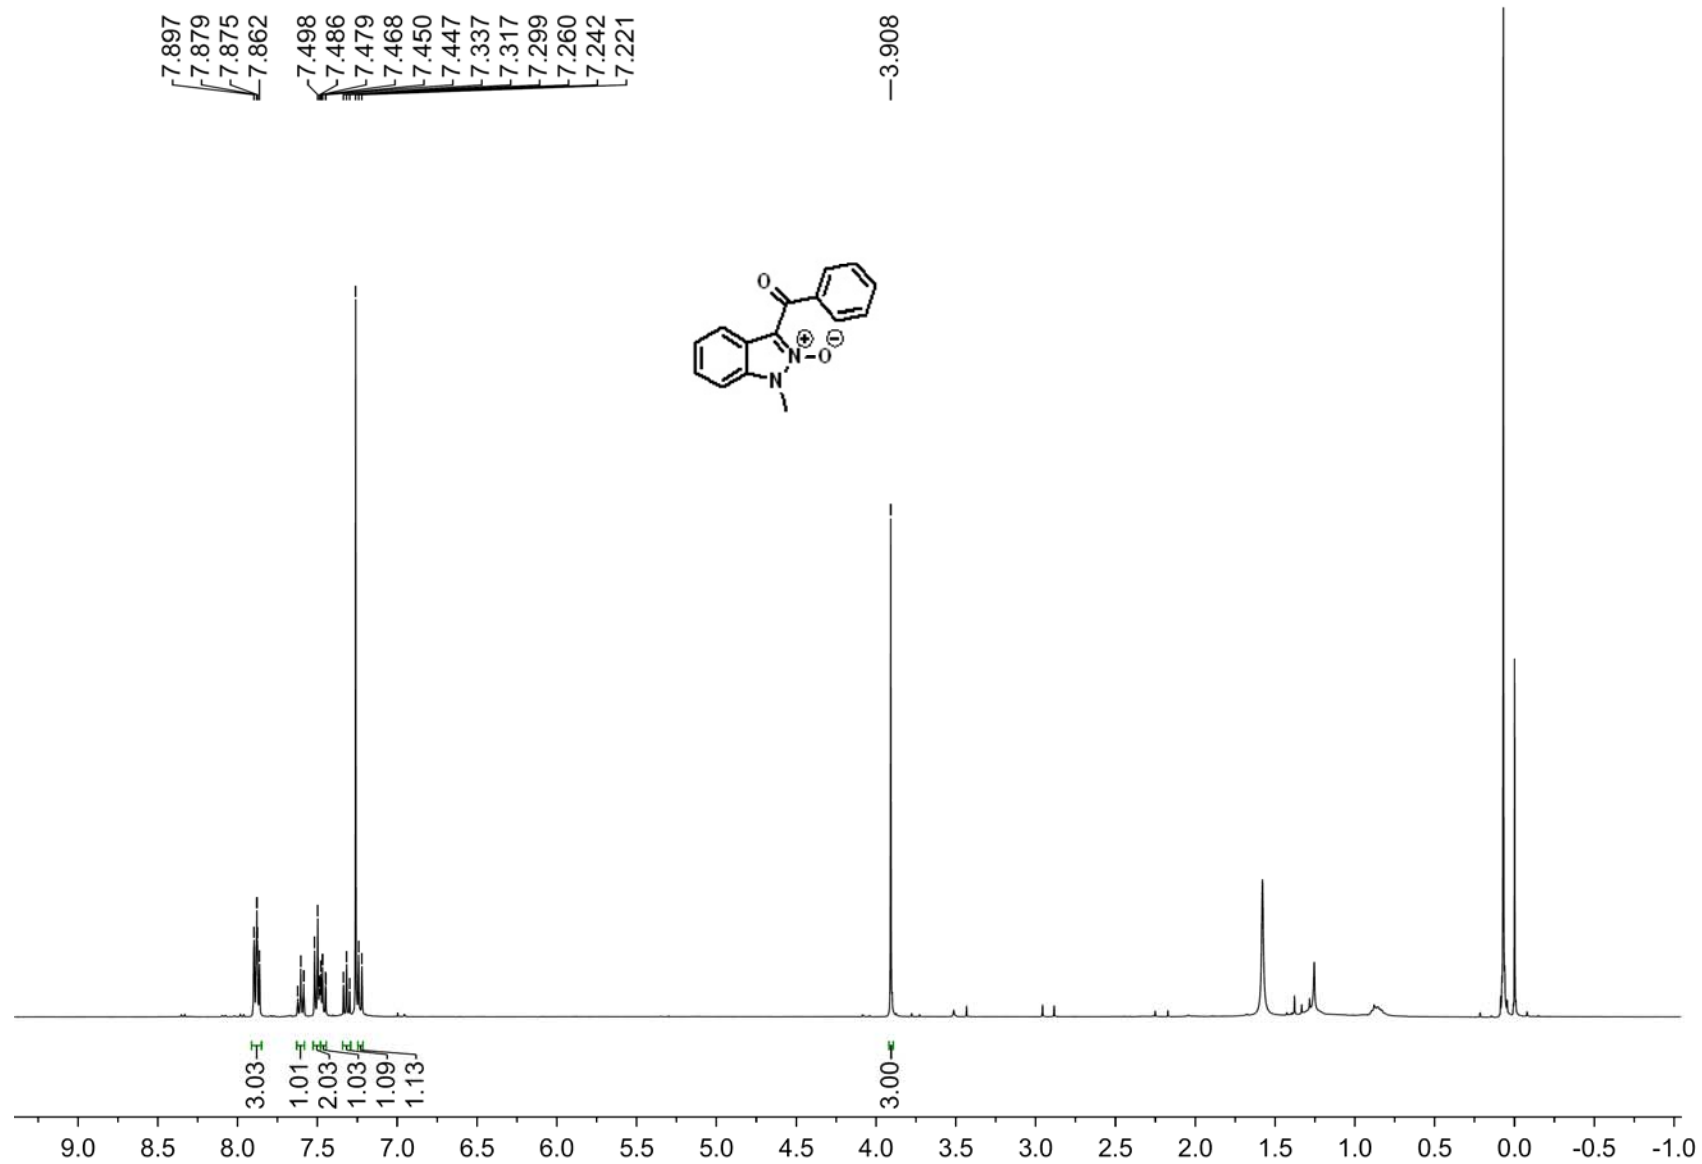

<sup>1</sup>H NMR Spectrum of Compound 3c

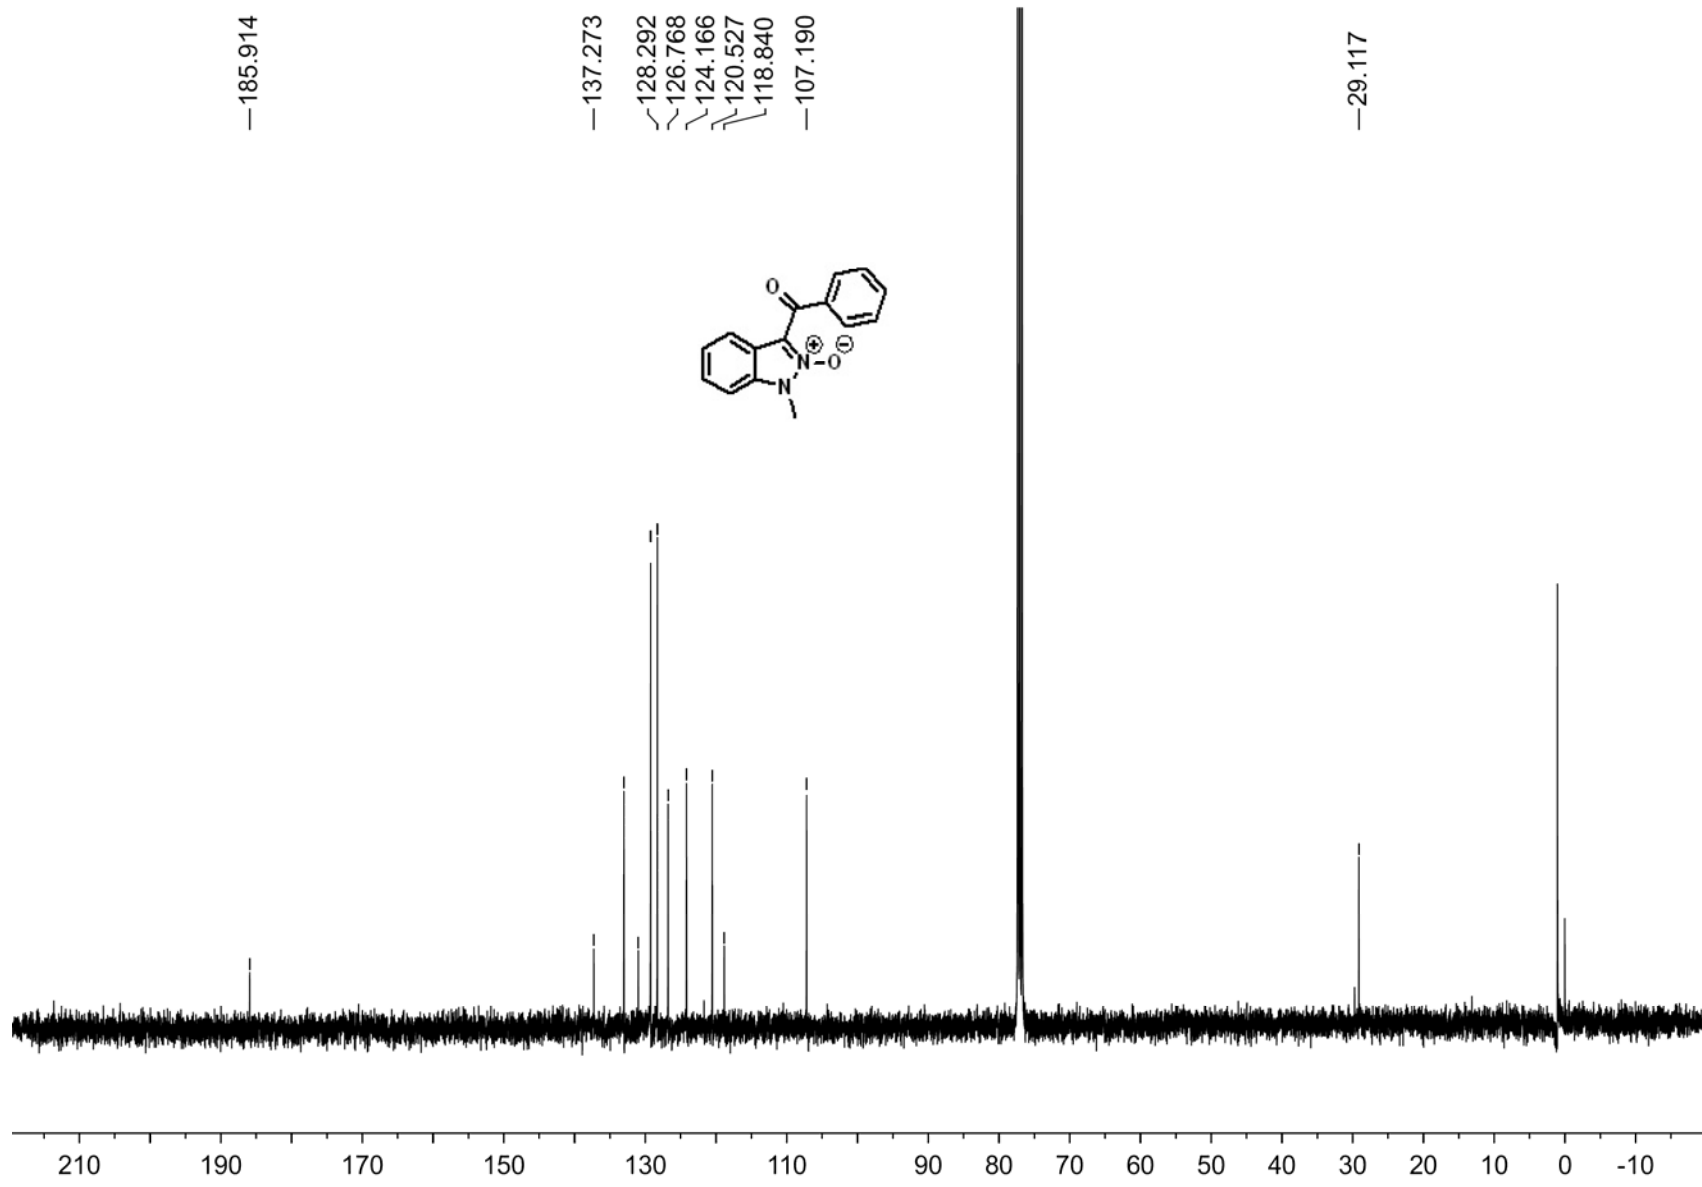

$^{13}\text{C}$  NMR Spectrum of Compound 3c

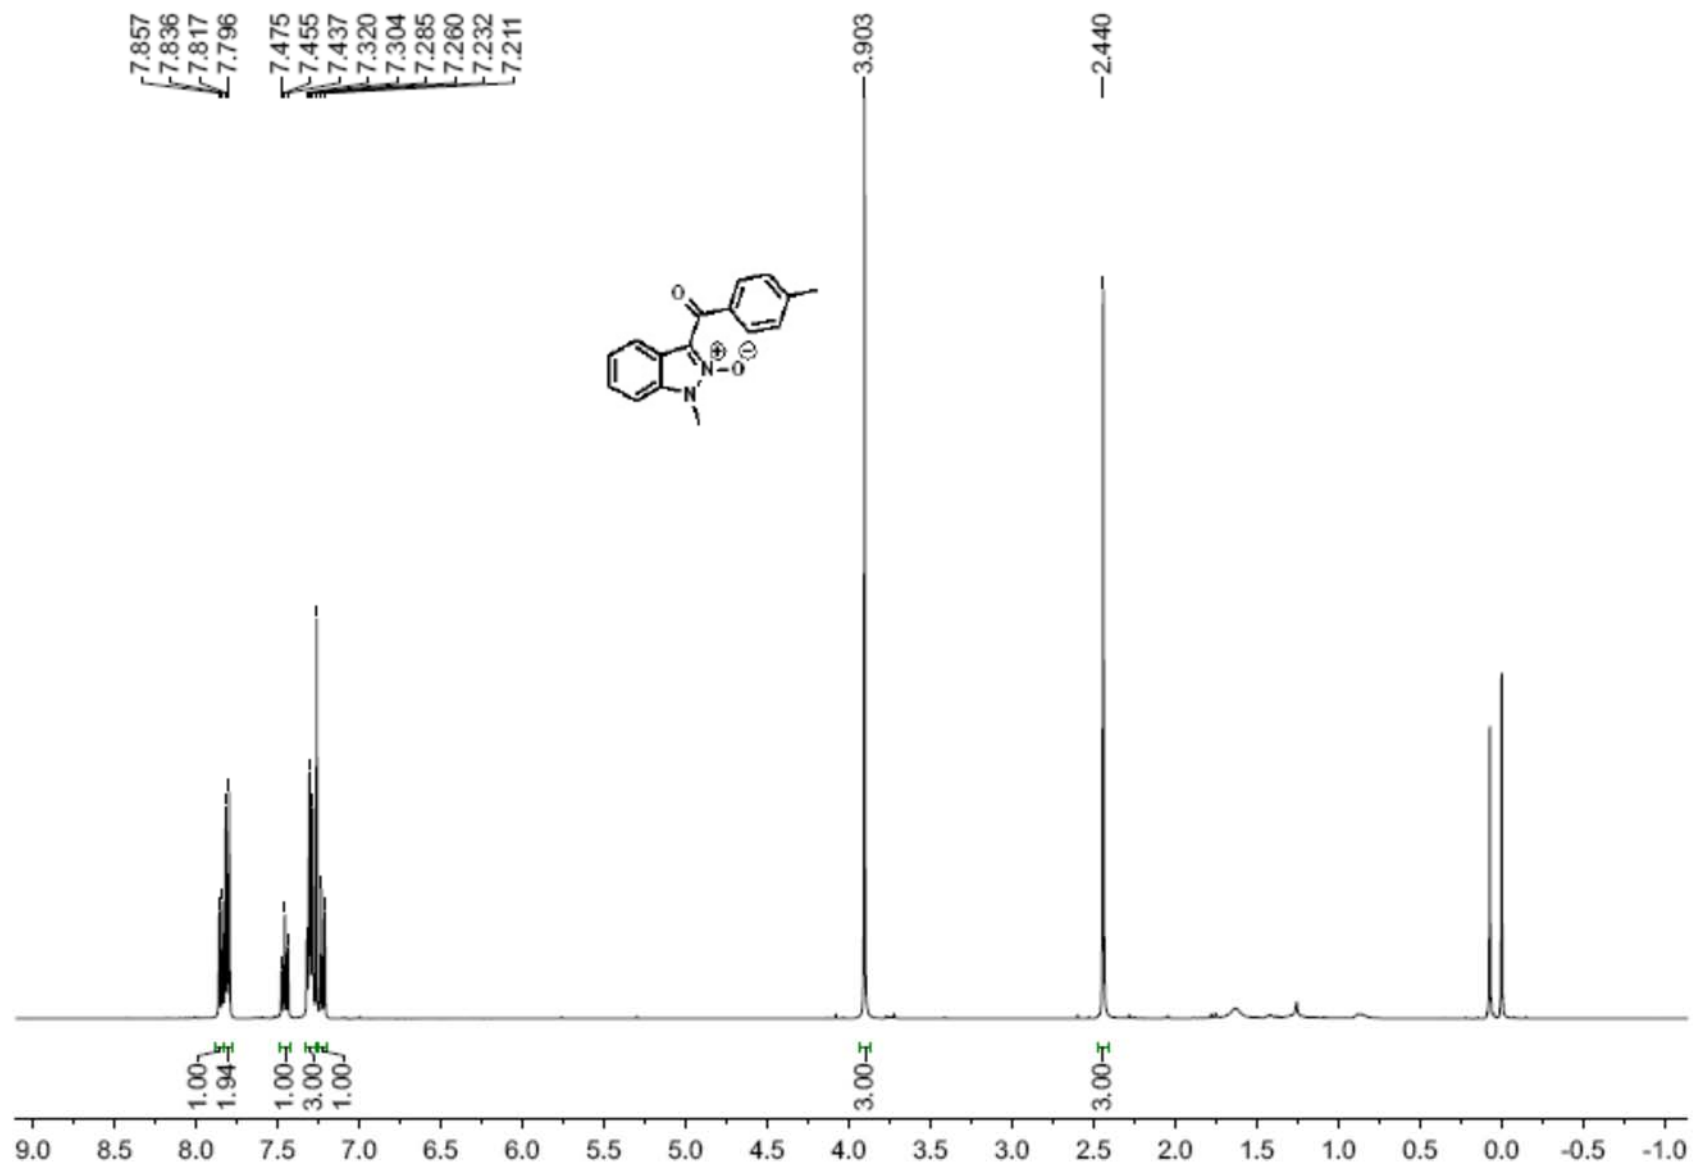

<sup>1</sup>H NMR Spectrum of Compound **3d**

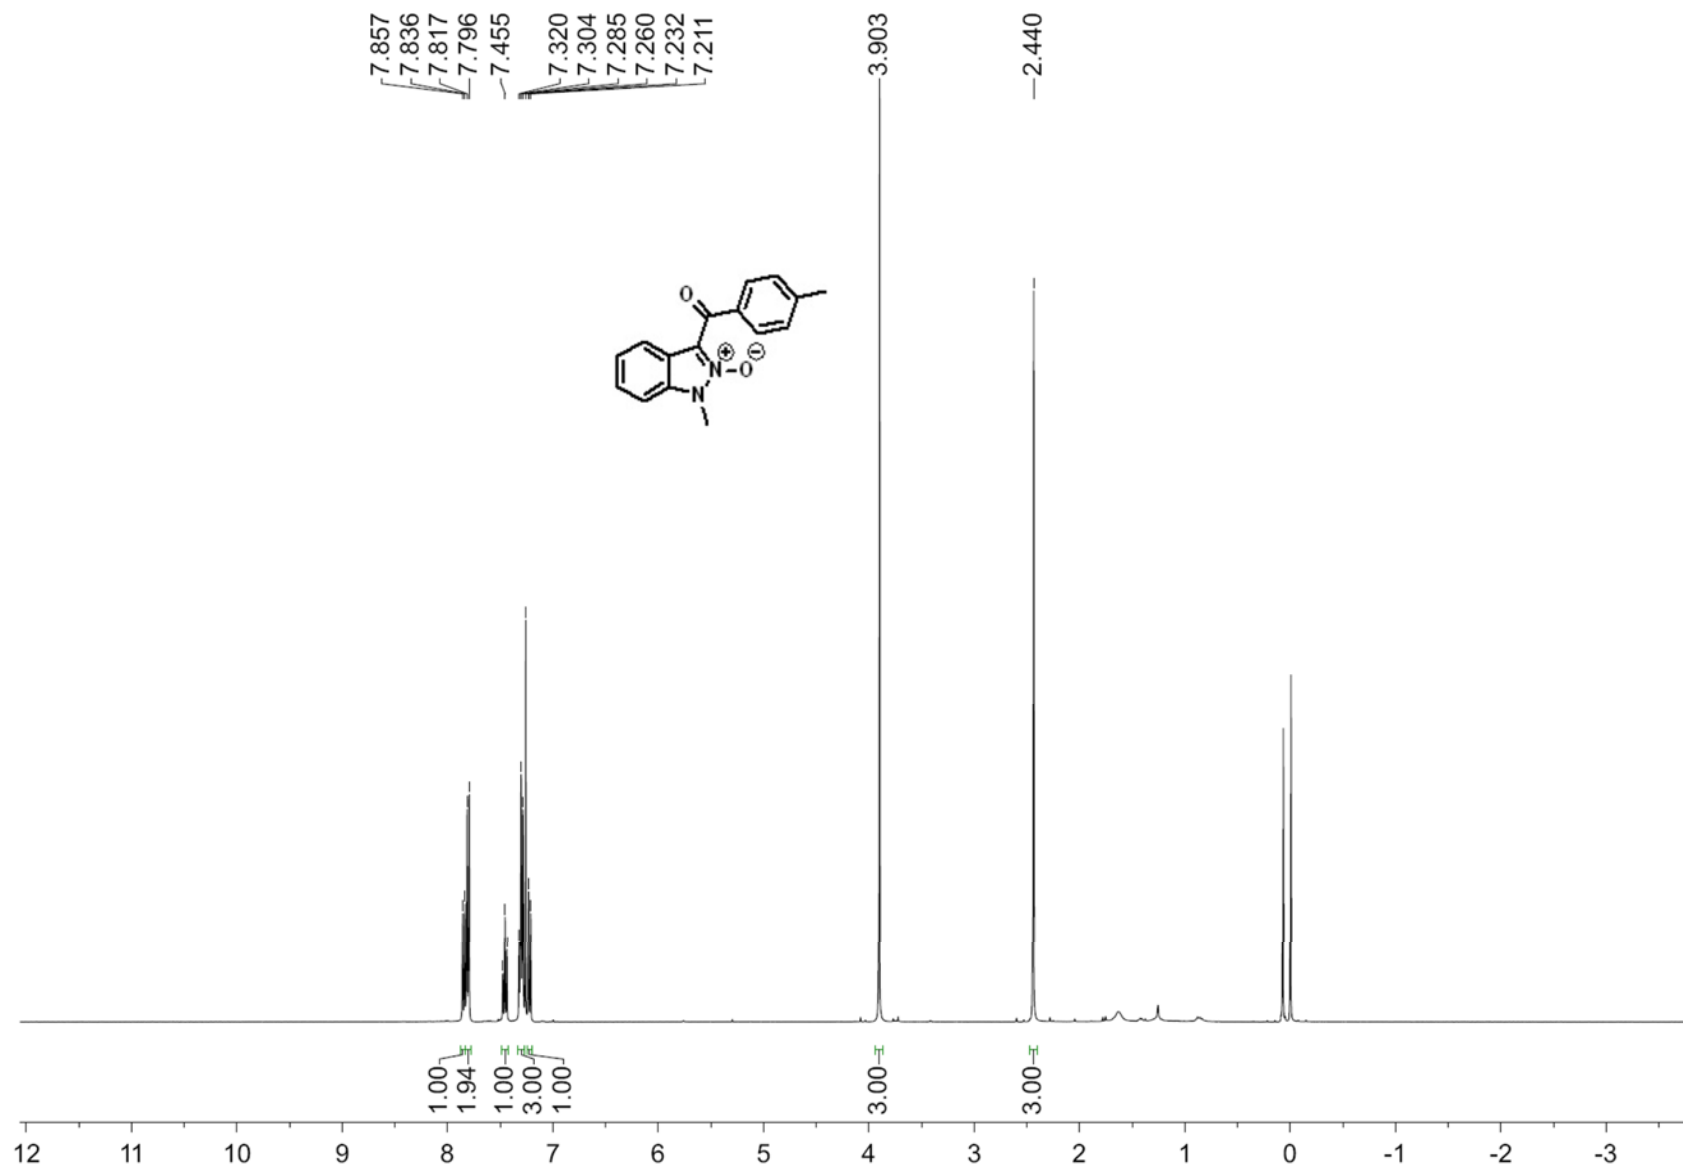

$^{13}\text{C}$  NMR Spectrum of Compound **3d**

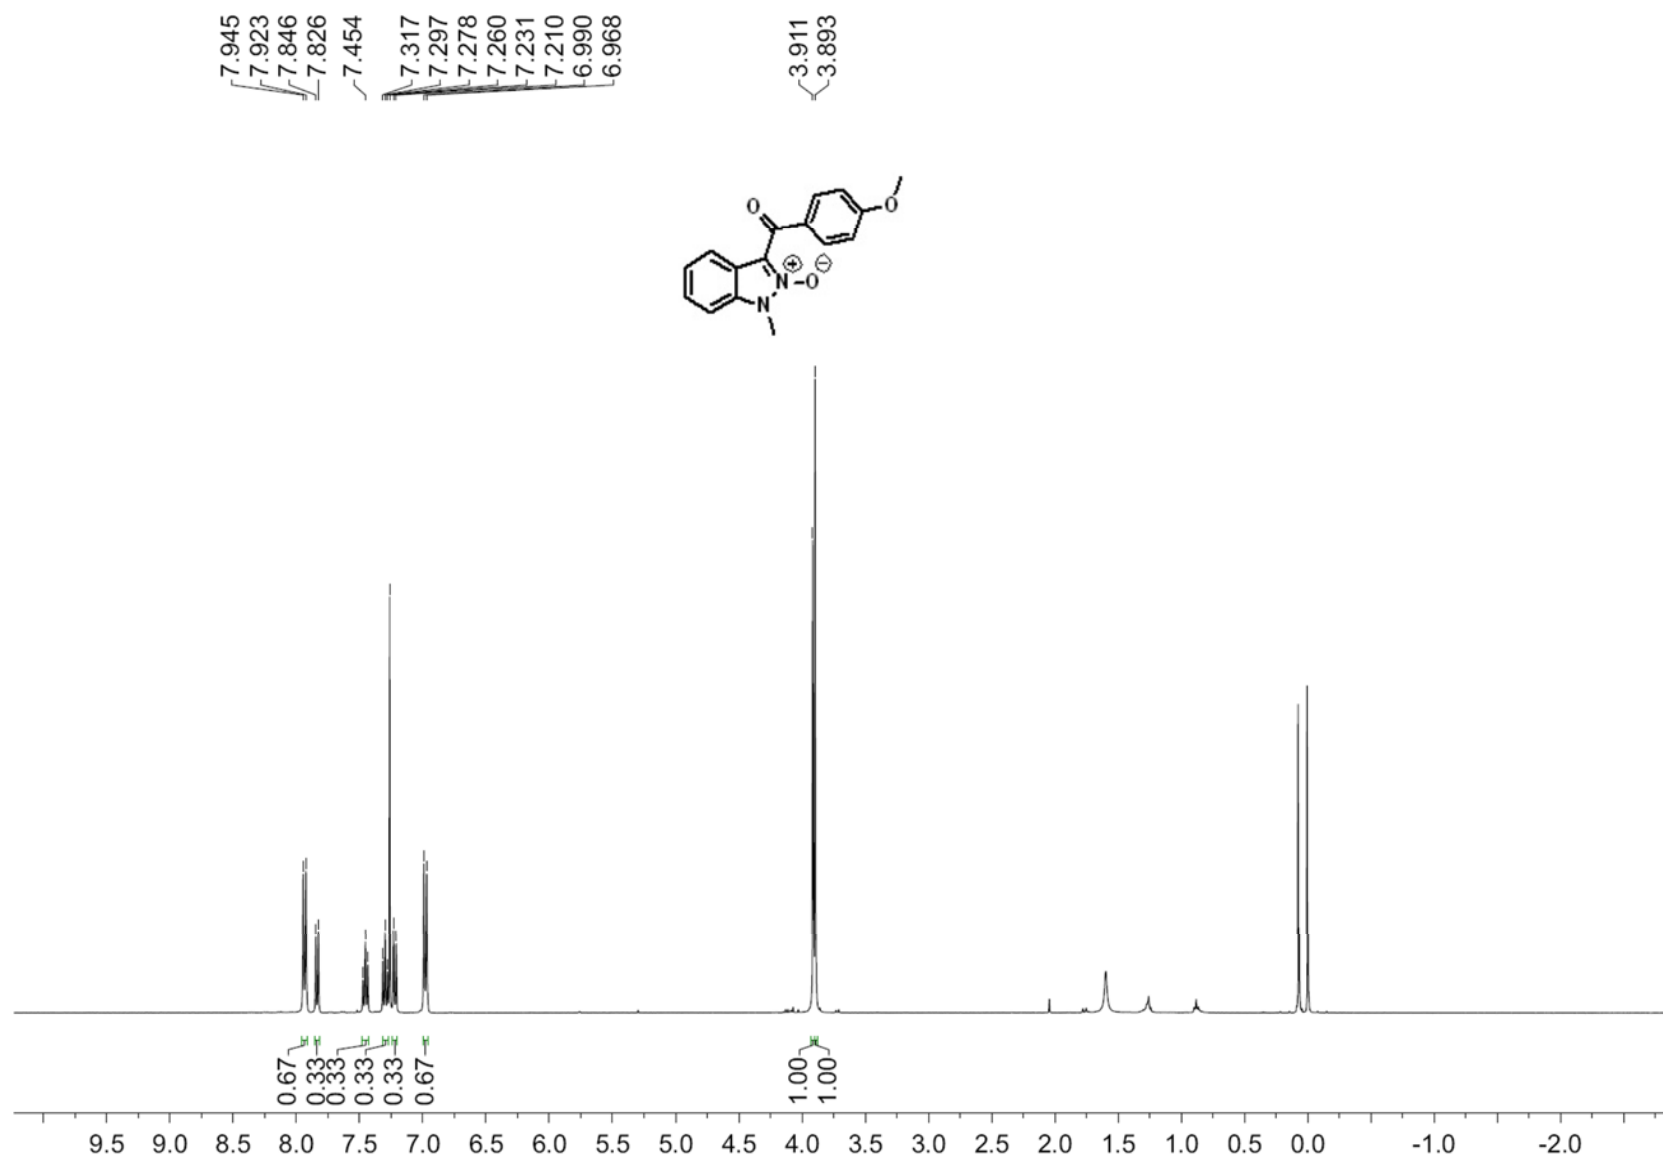

<sup>1</sup>H NMR Spectrum of Compound **3e**

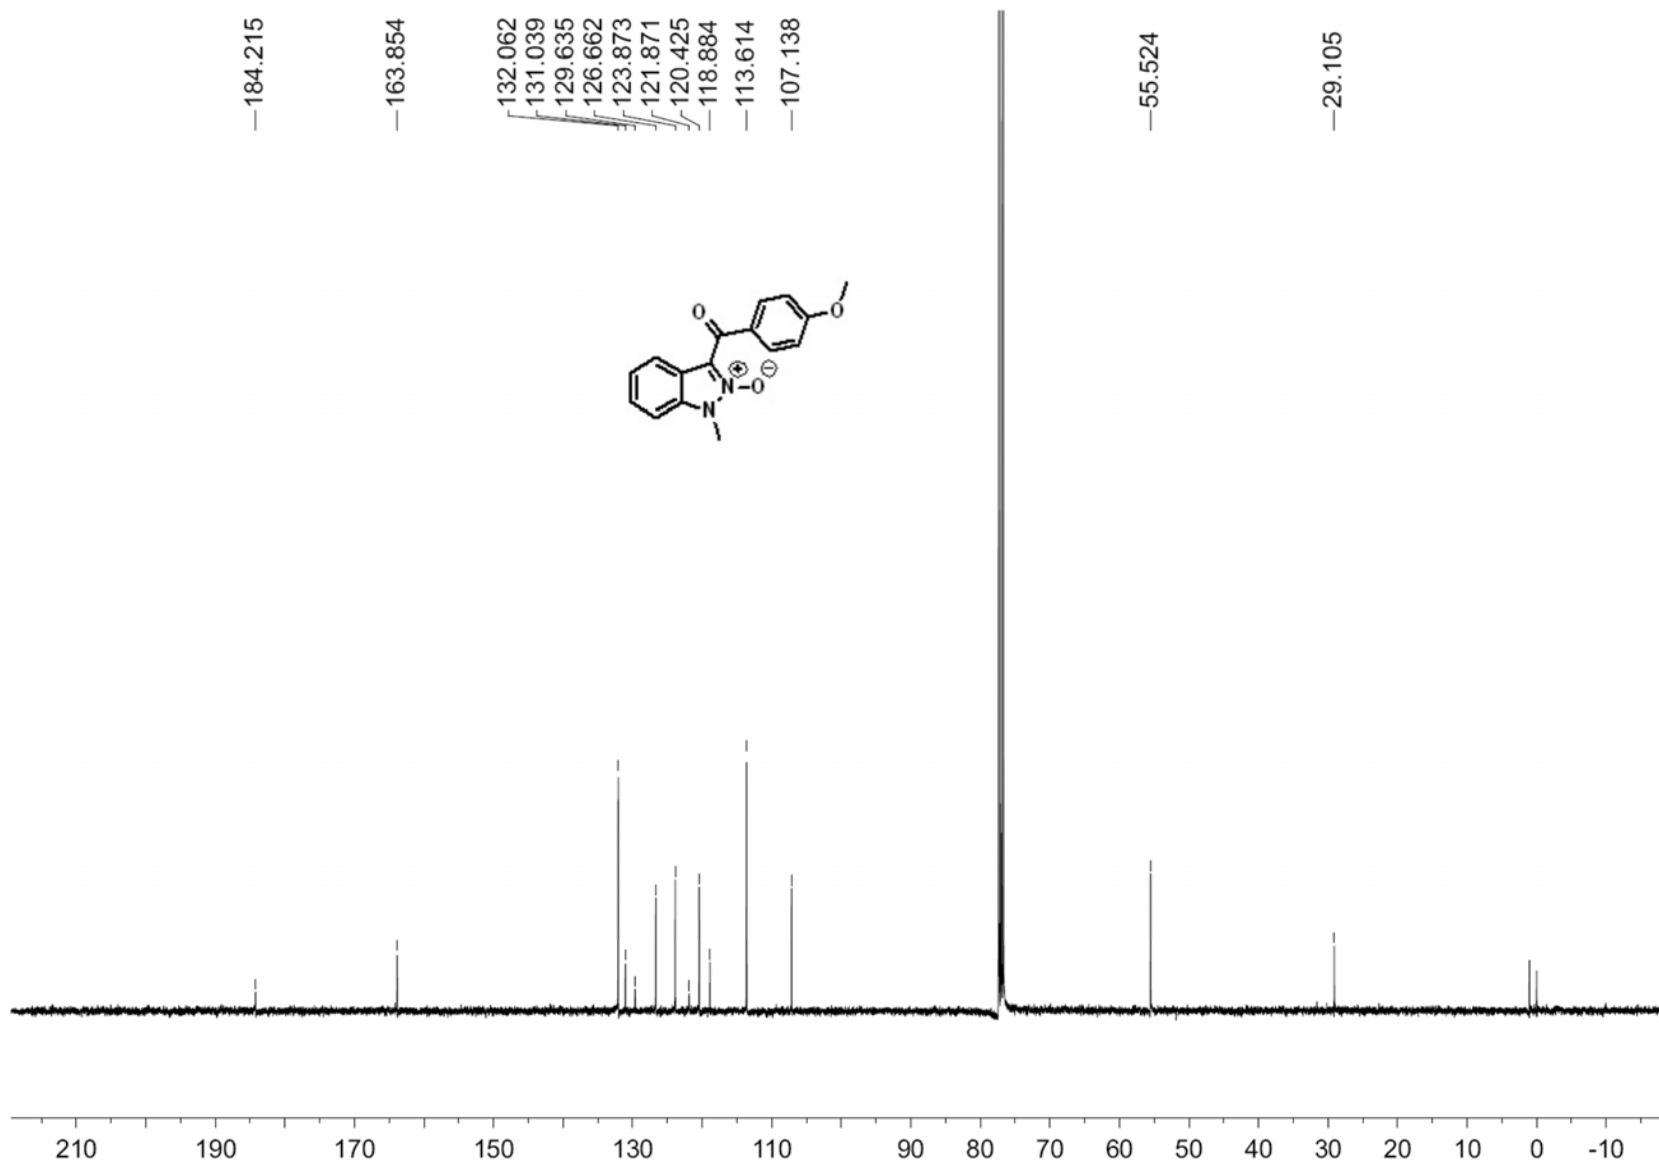

$^{13}\text{C}$  NMR Spectrum of Compound 3e

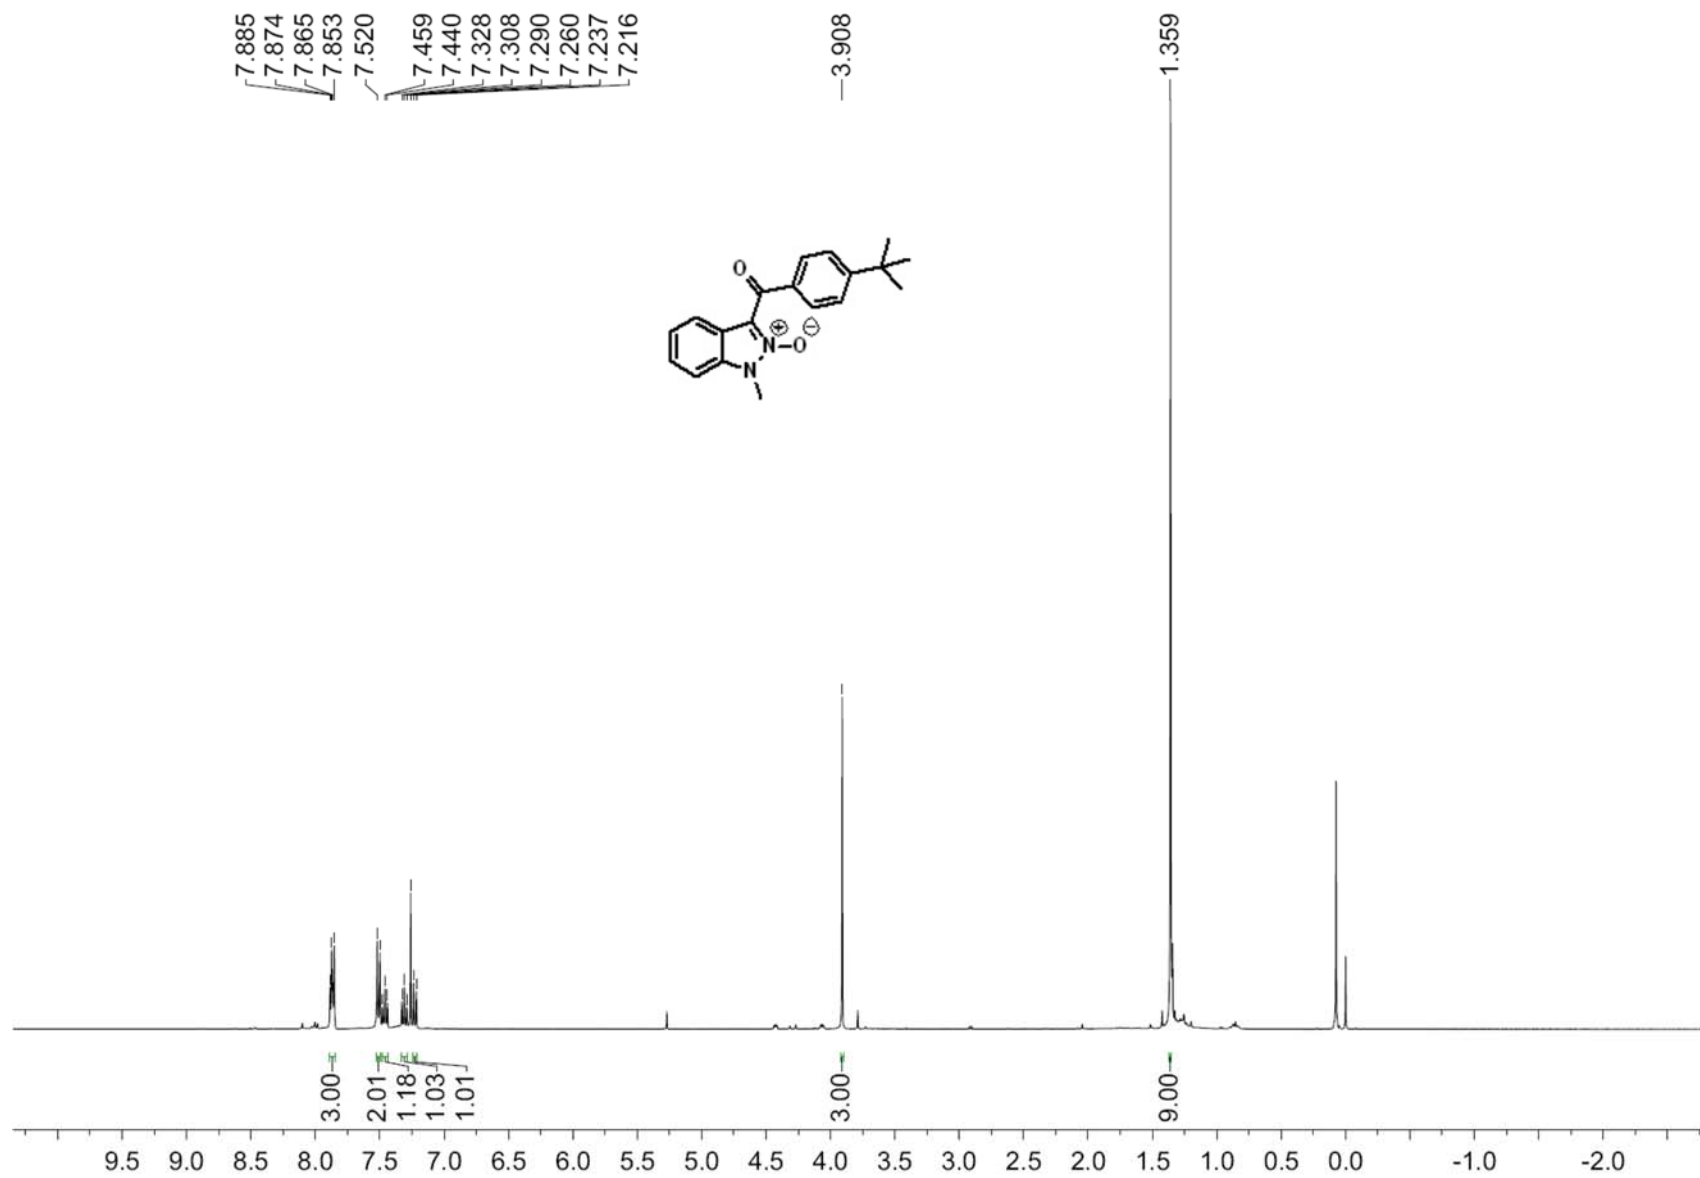

<sup>1</sup>H NMR Spectrum of Compound 3f



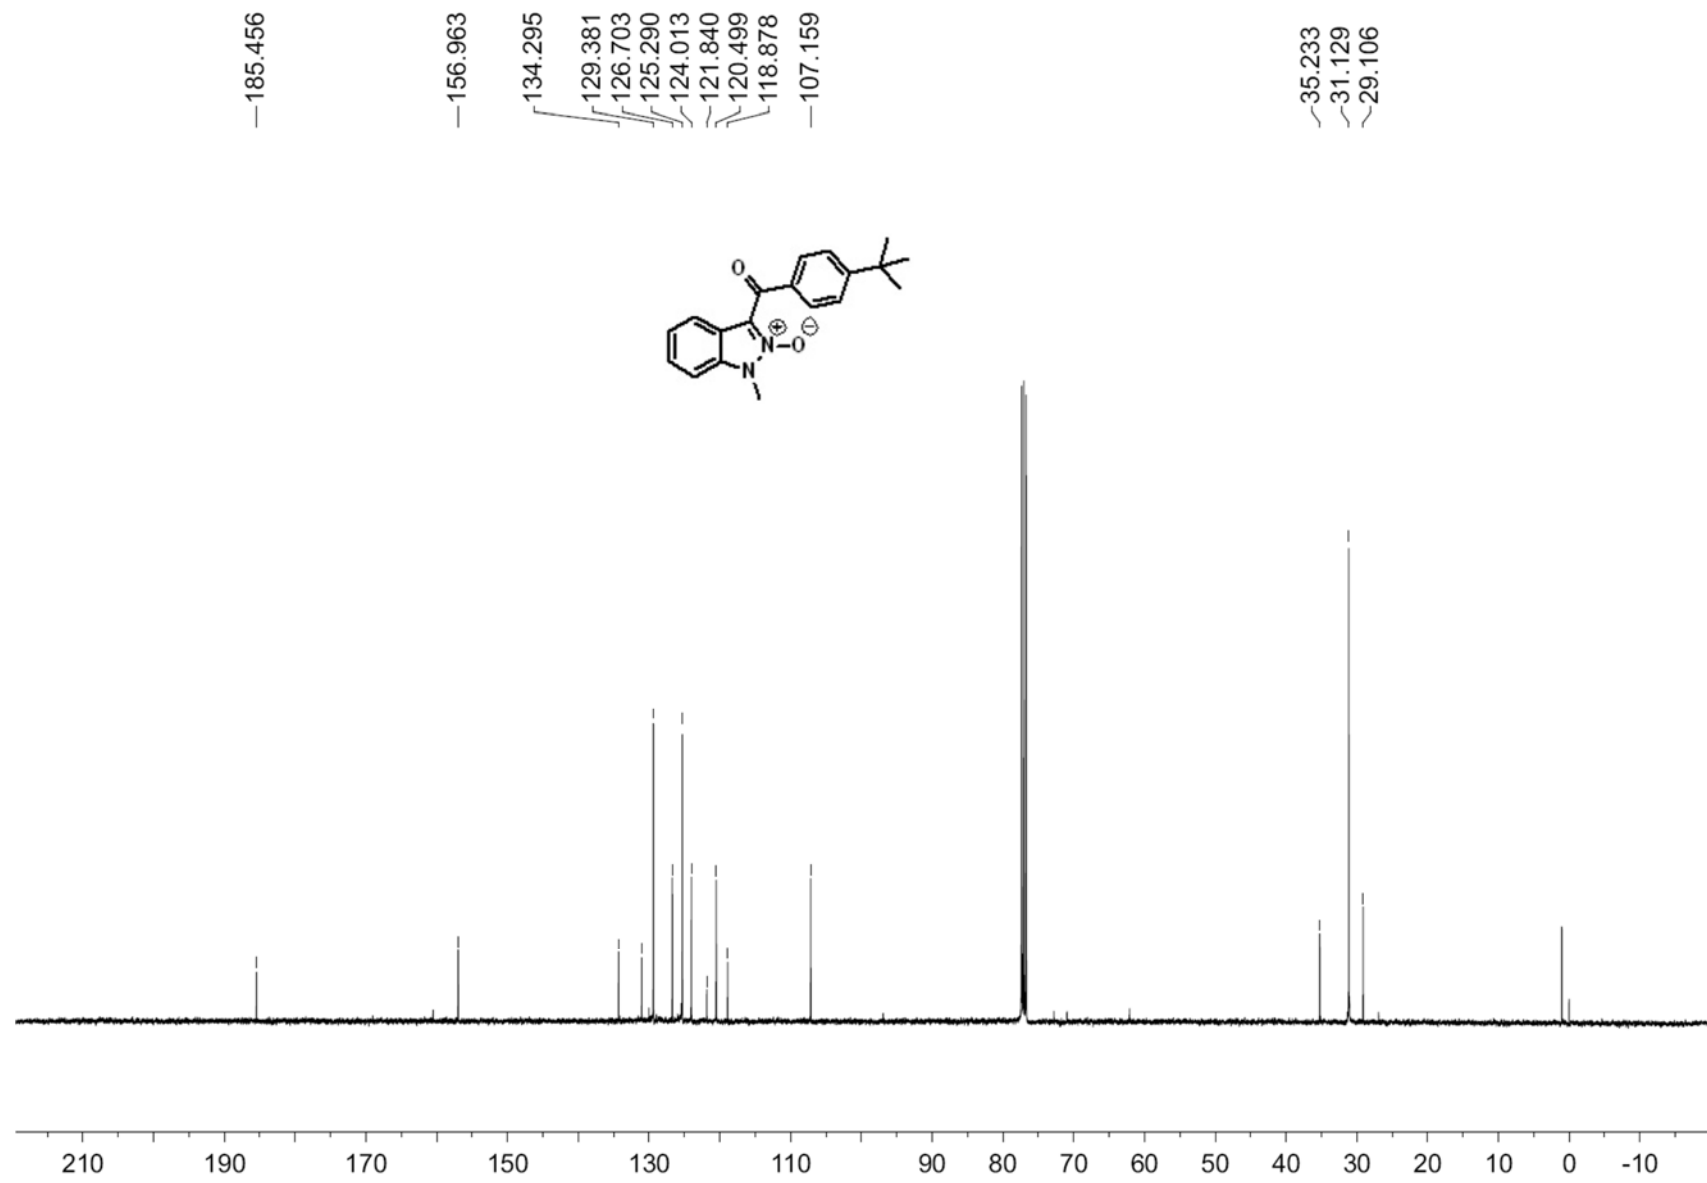

$^{13}\text{C}$  NMR Spectrum of Compound **3f**

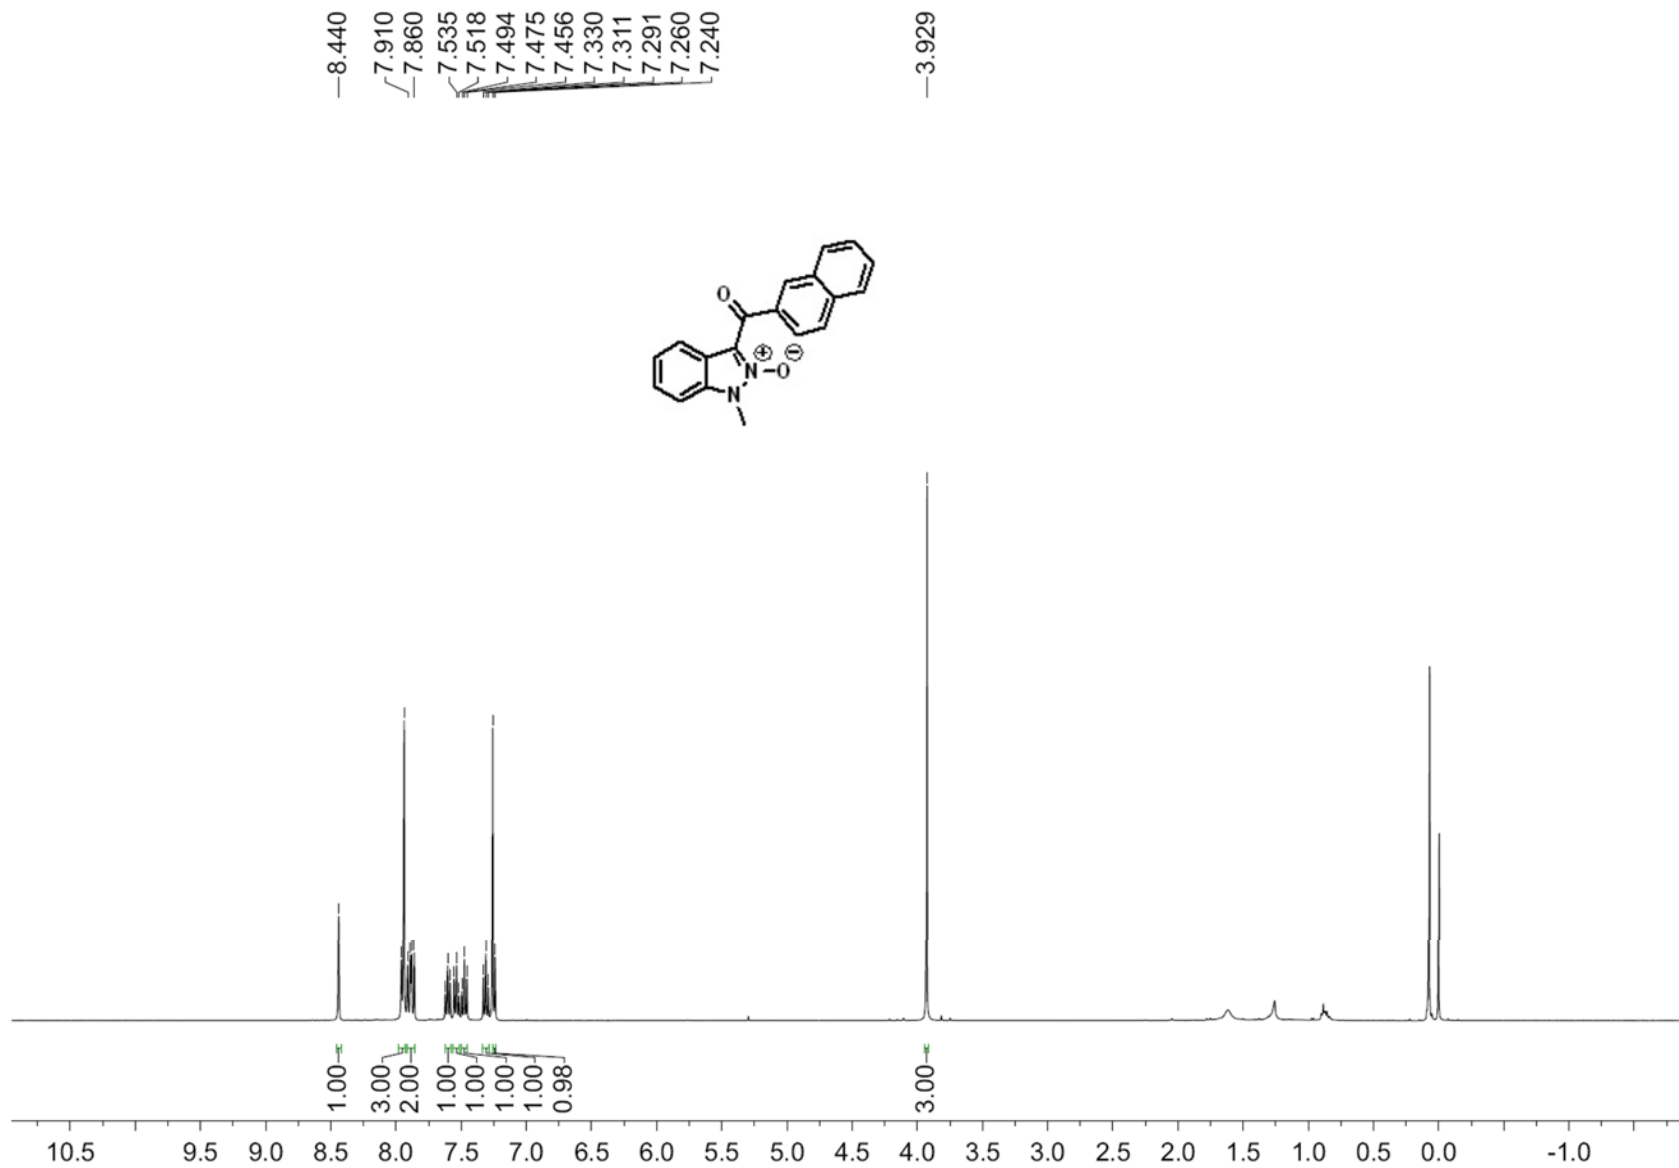

<sup>1</sup>H NMR Spectrum of Compound 3g

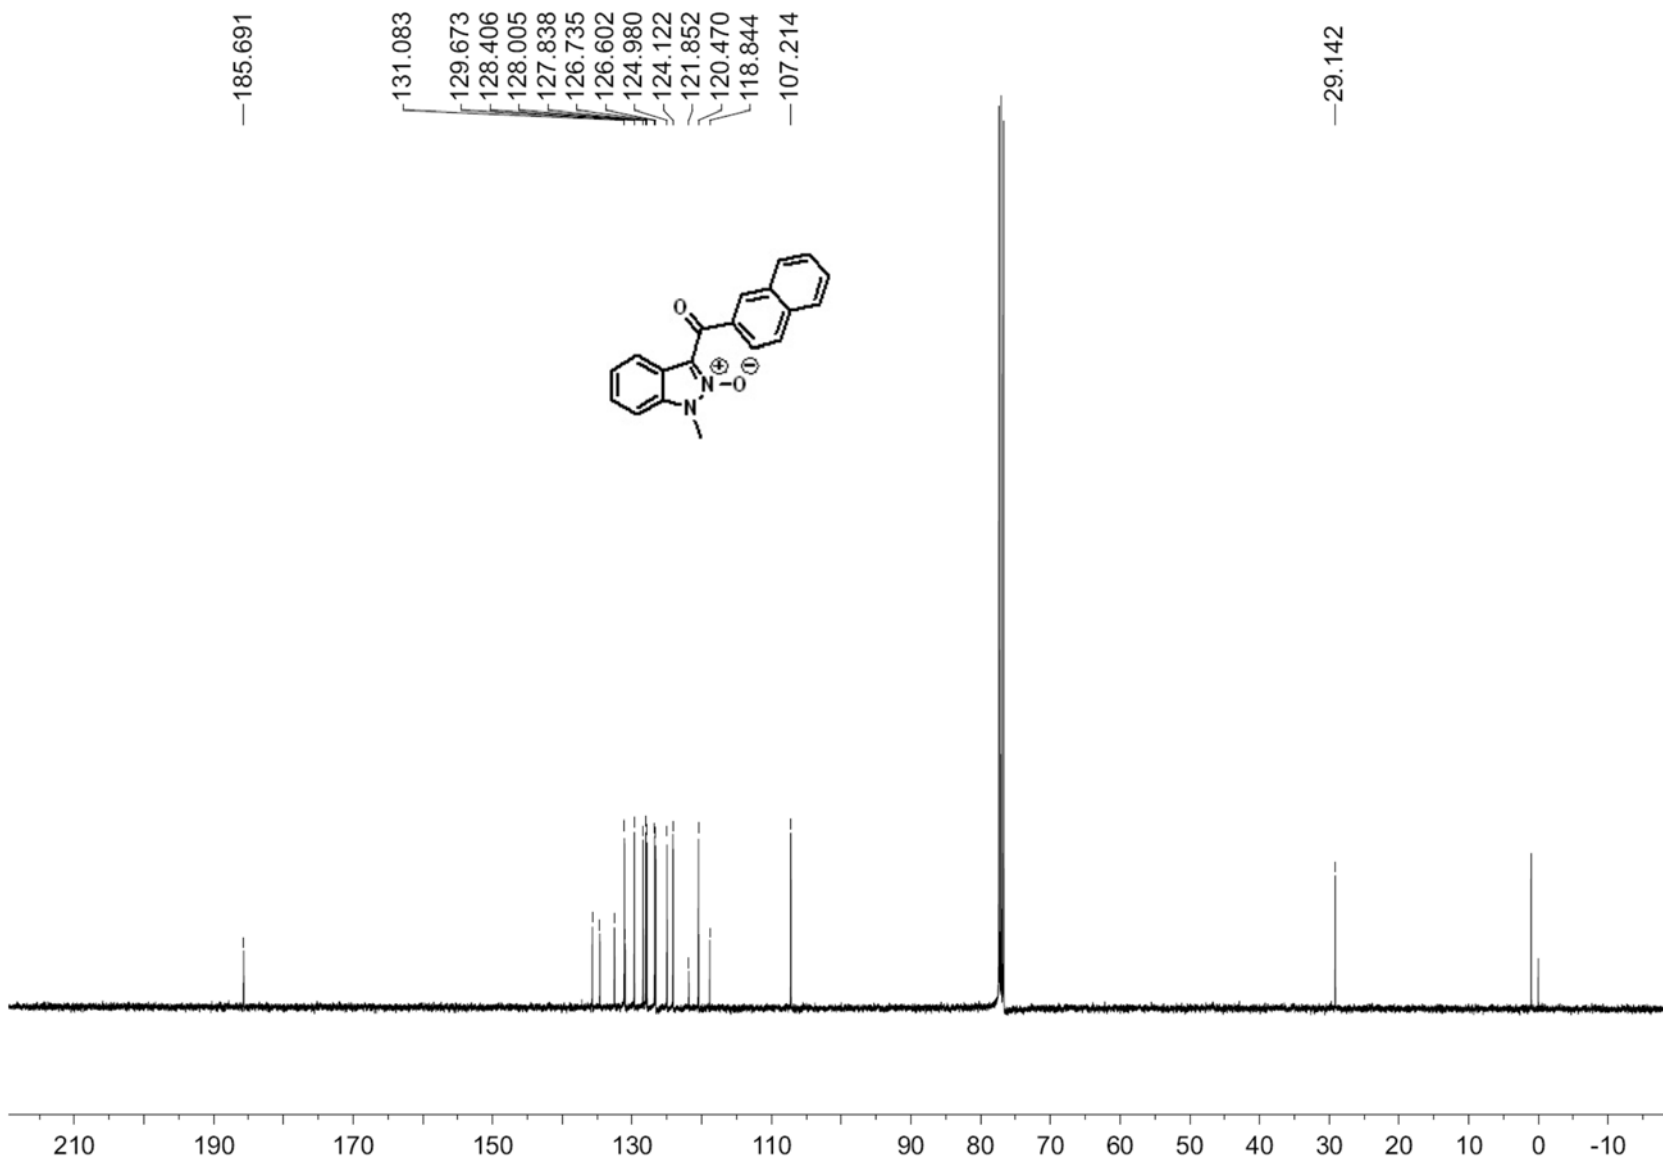

$^{13}\text{C}$  NMR Spectrum of Compound **3g**

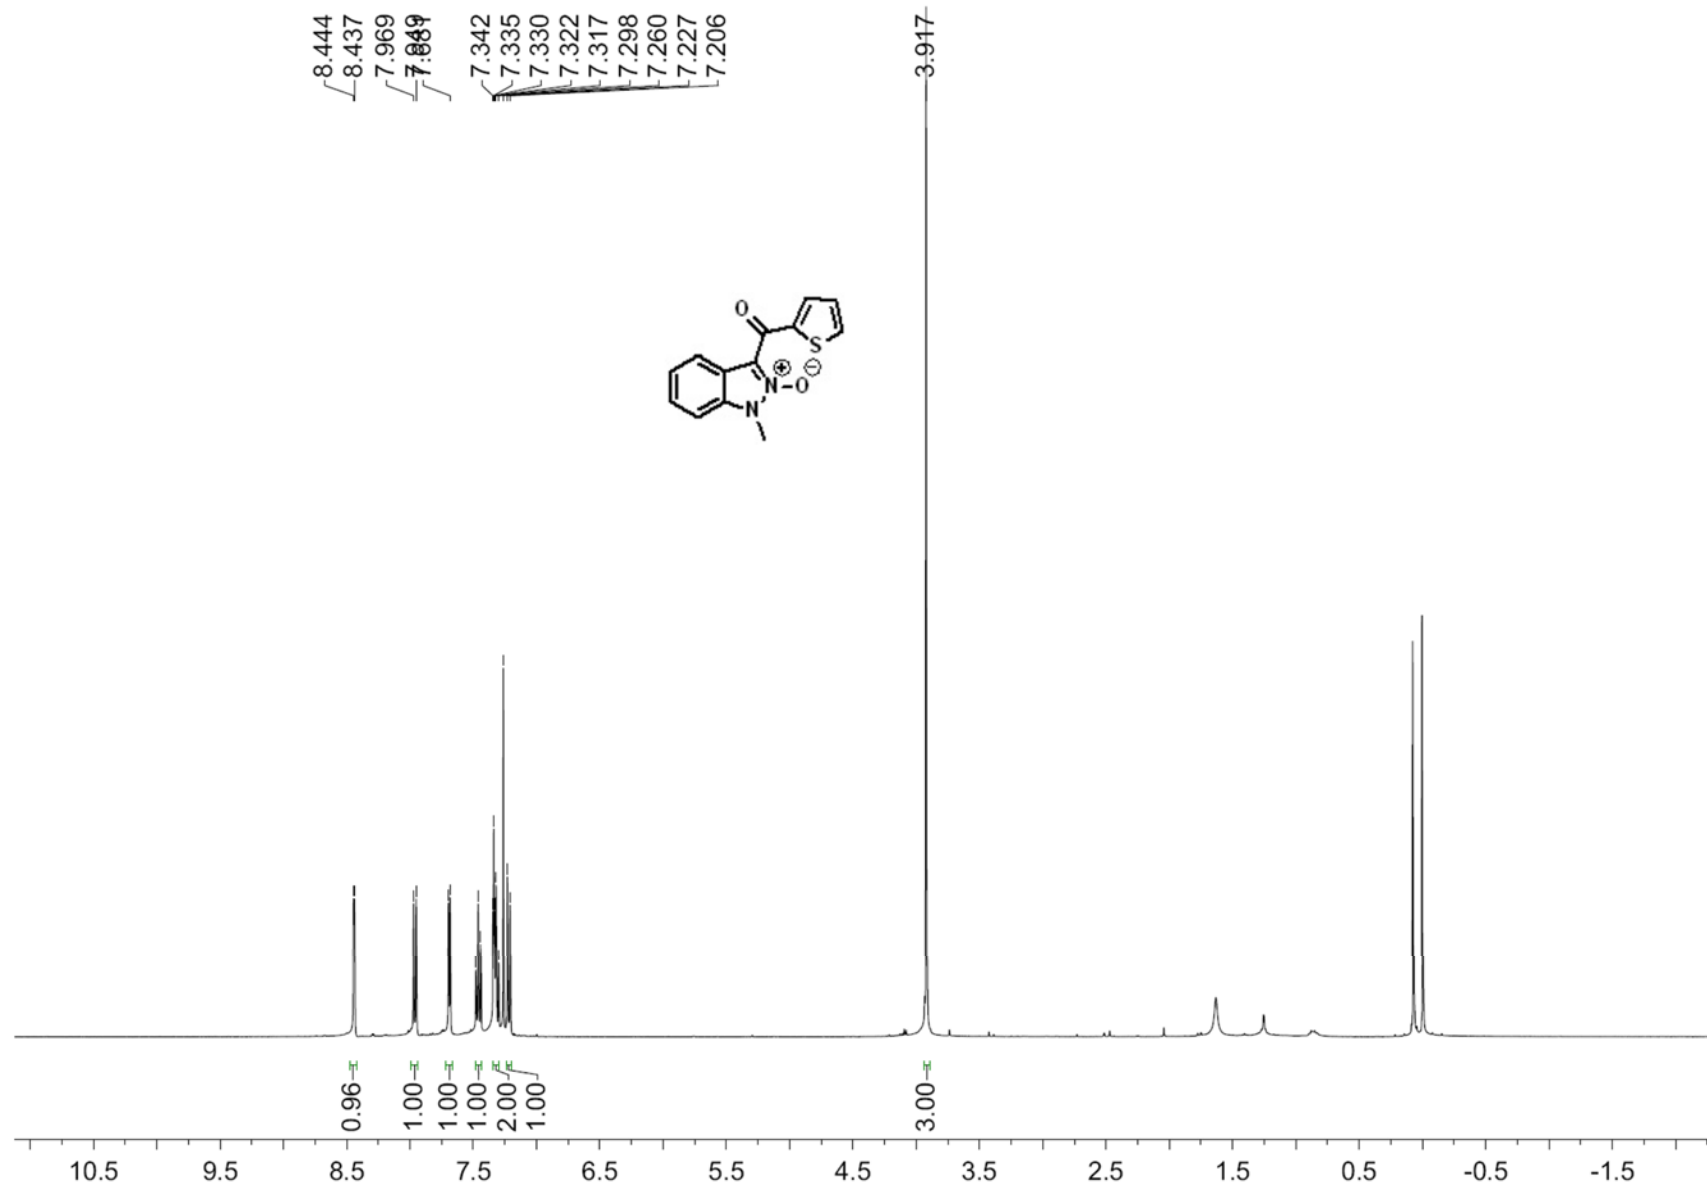

$^1\text{H}$  NMR Spectrum of Compound **3h**

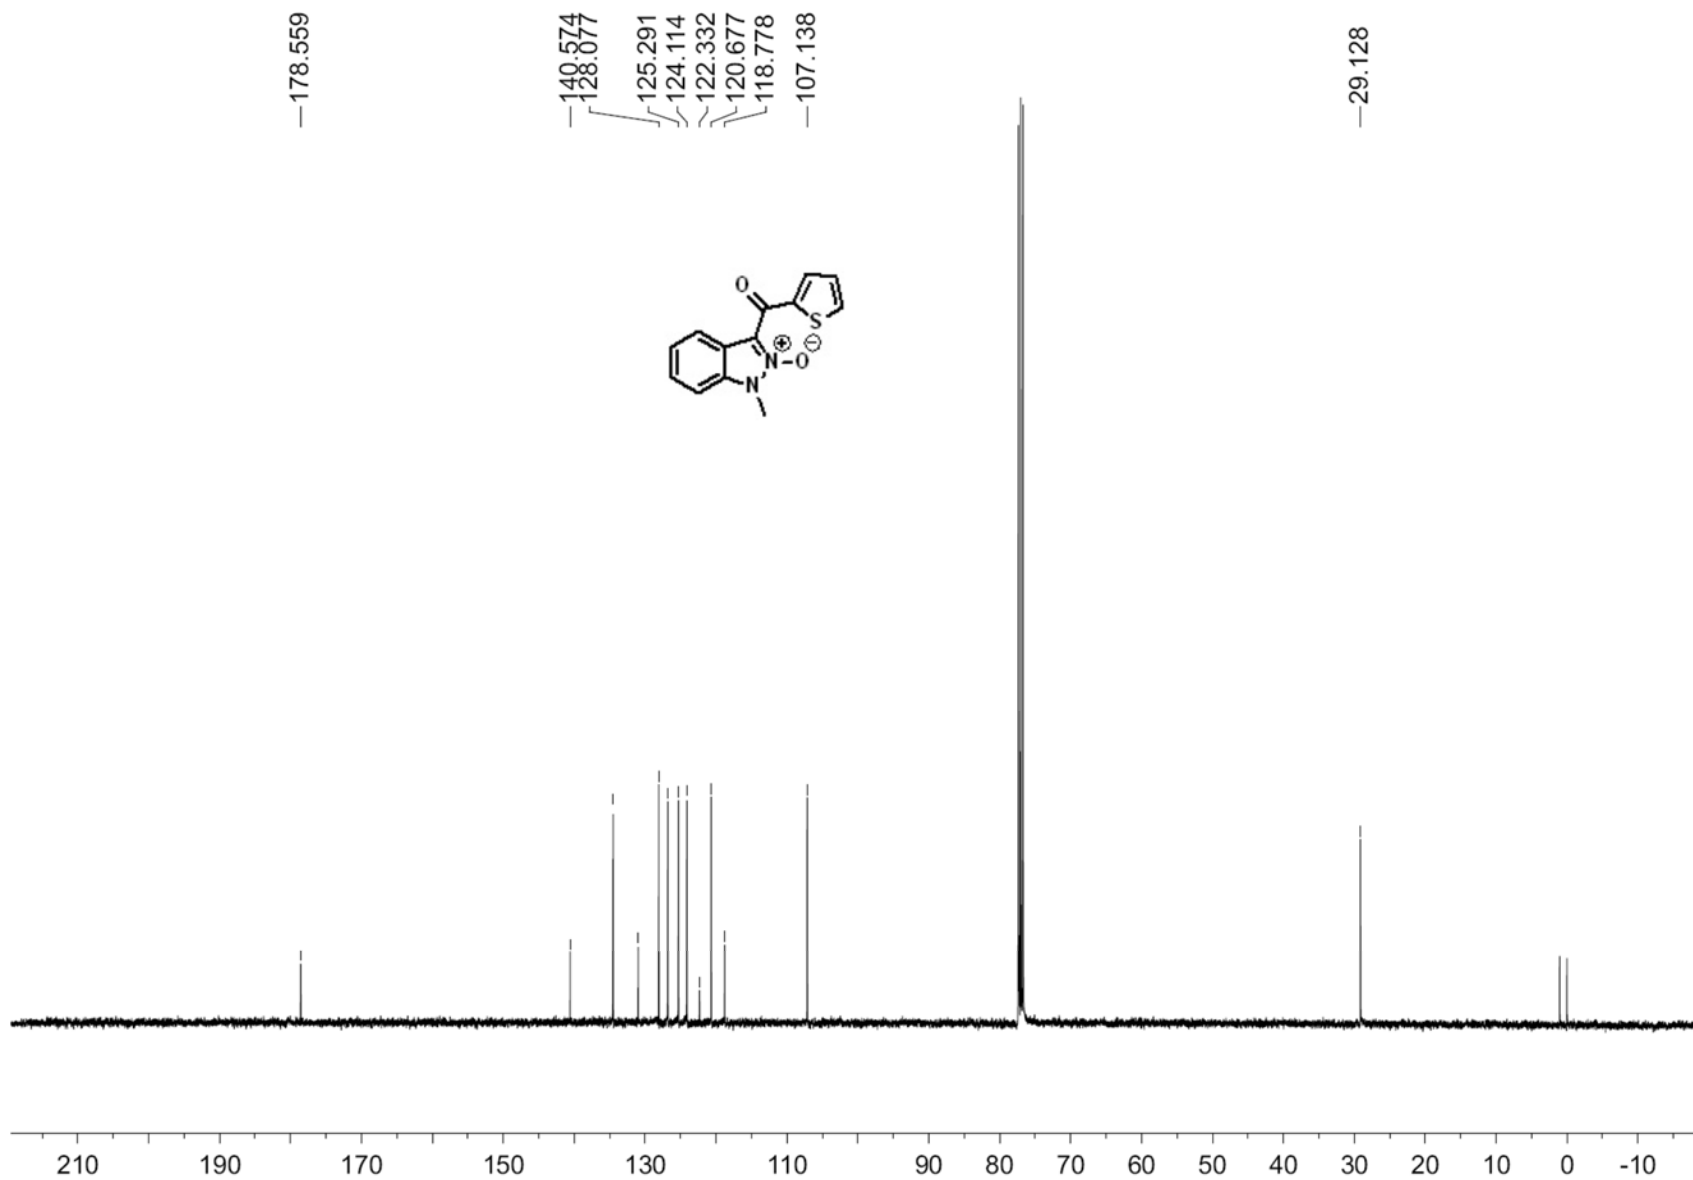

$^{13}\text{C}$  NMR Spectrum of Compound **3h**

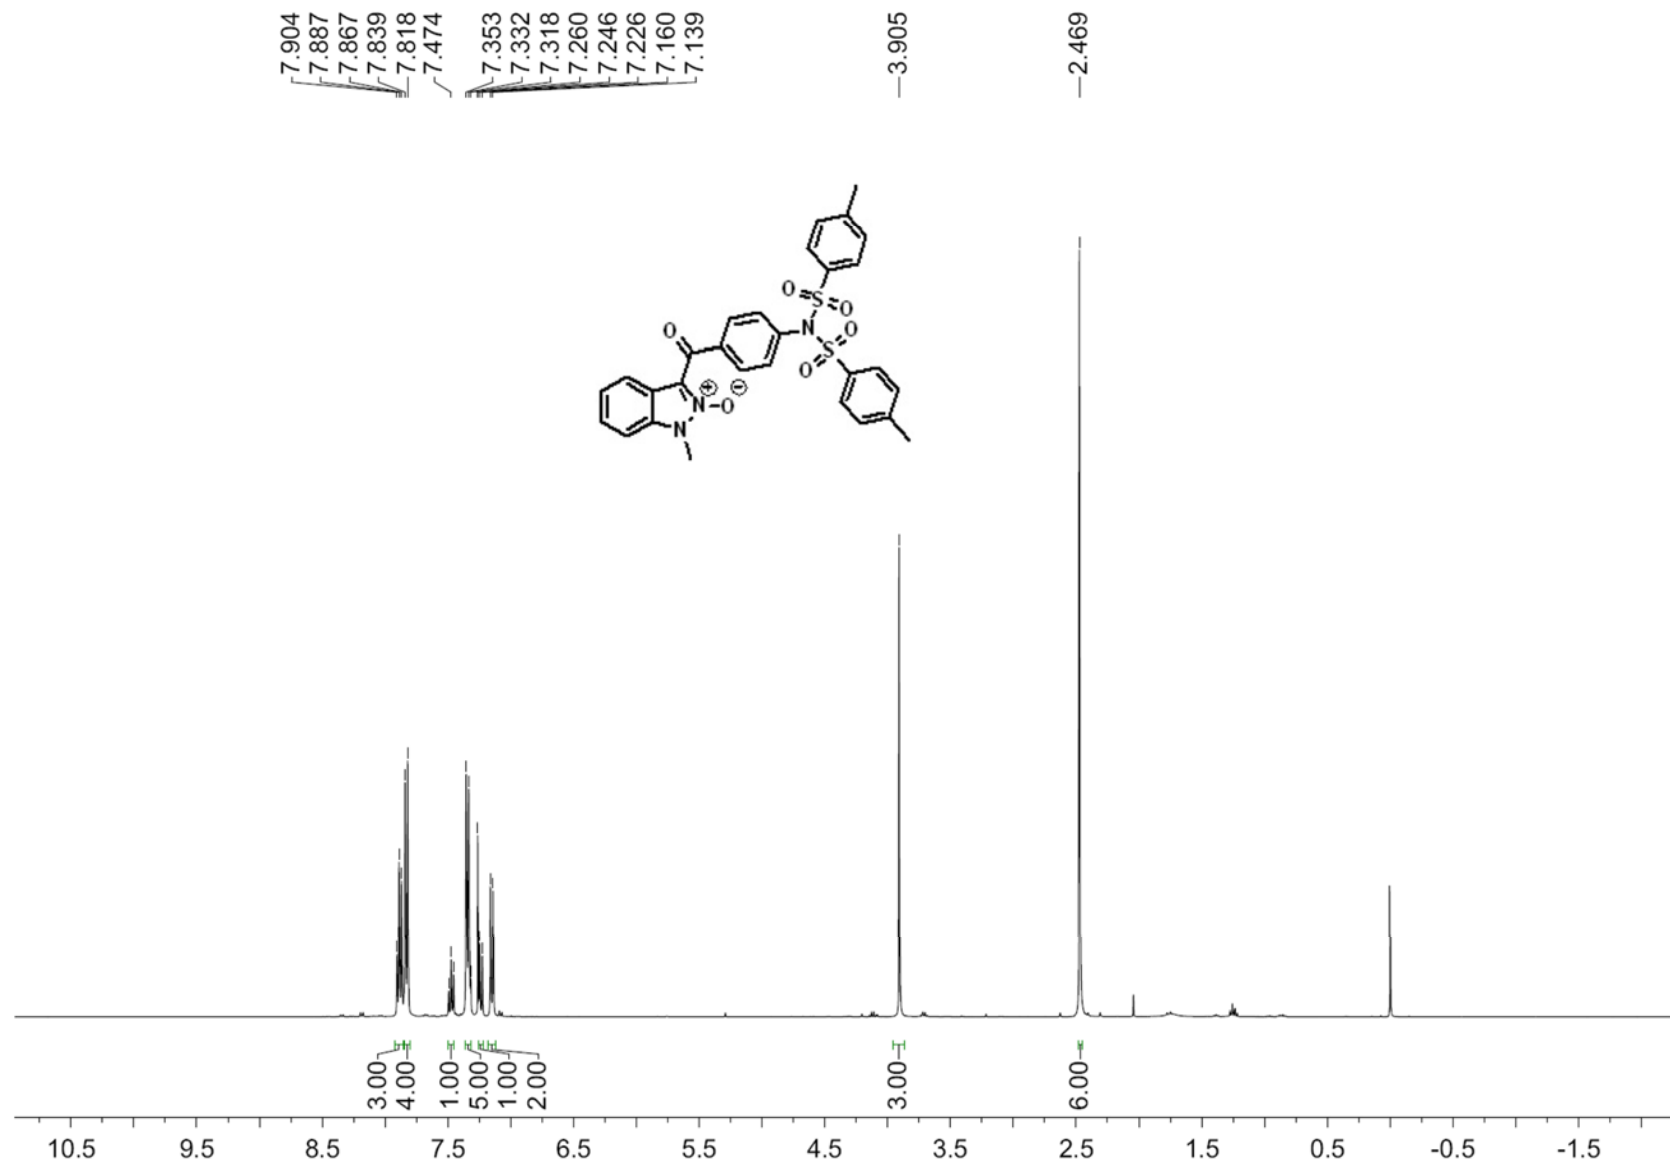

<sup>1</sup>H NMR Spectrum of Compound 3i

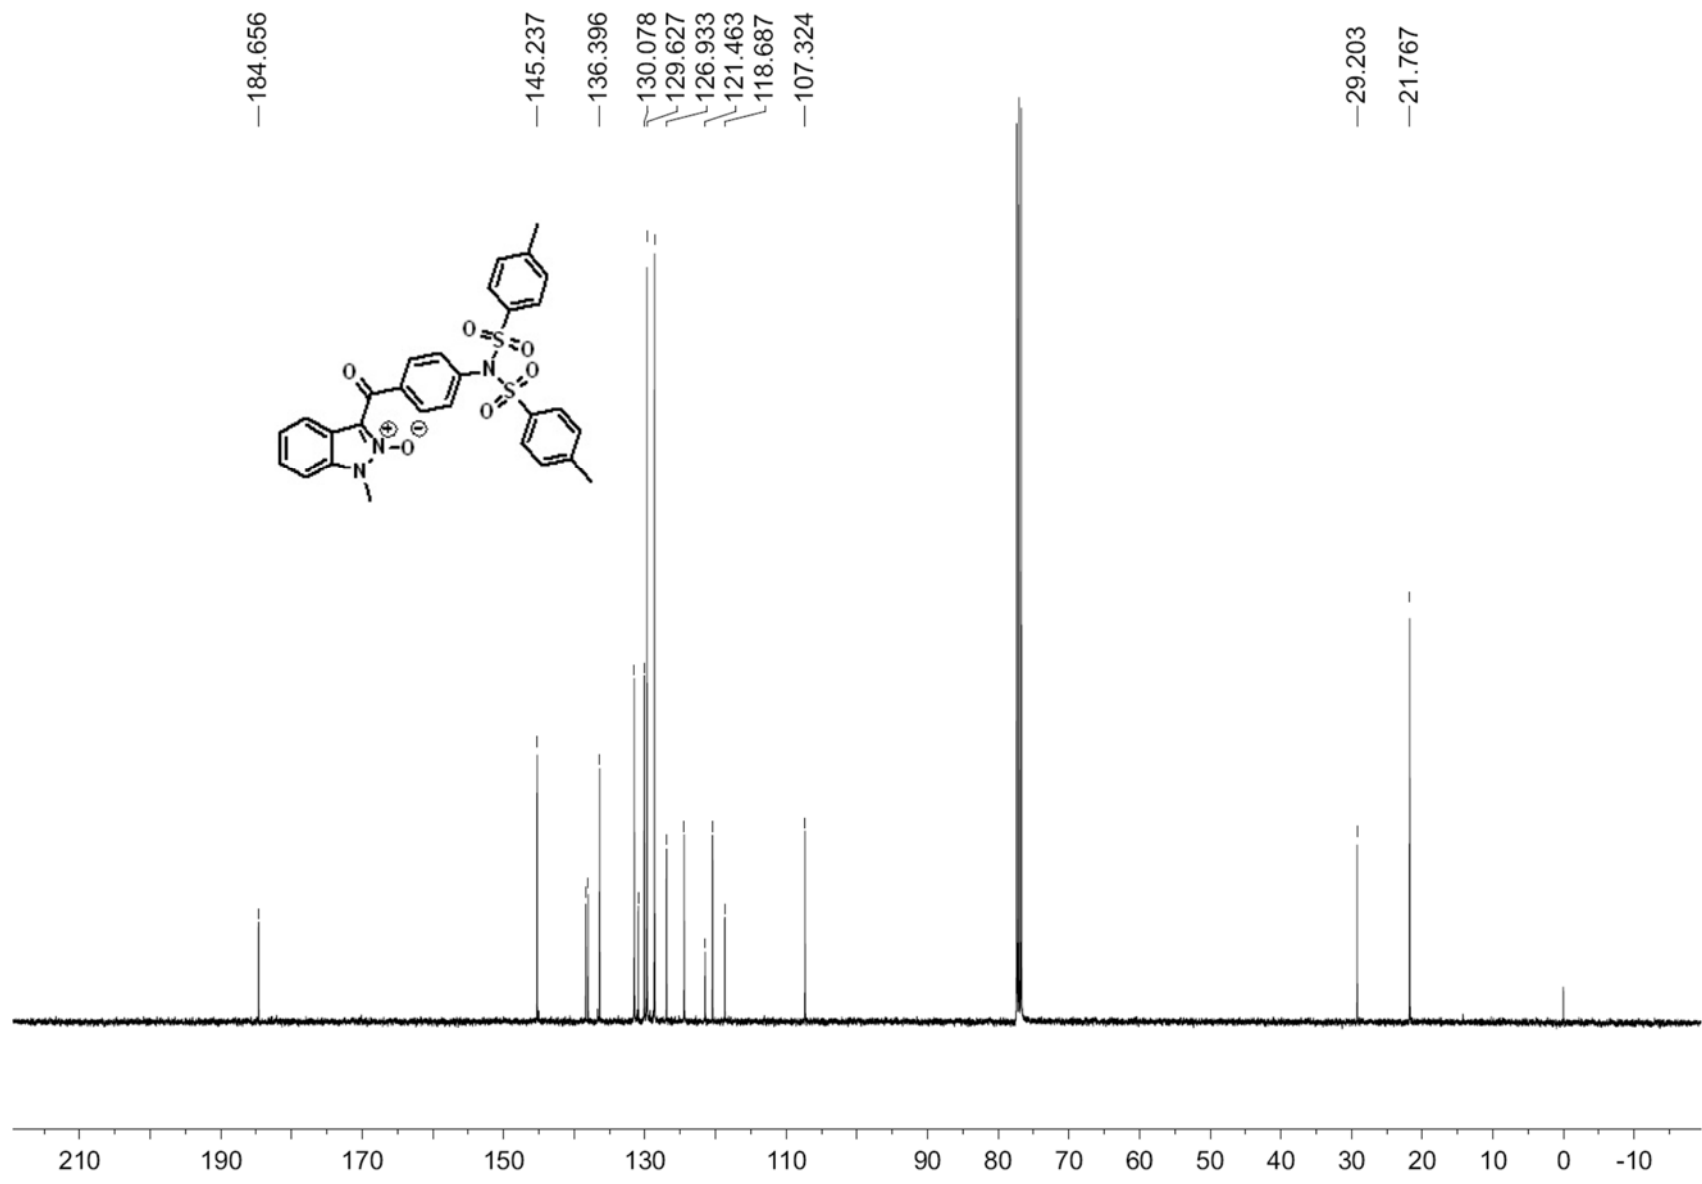

<sup>13</sup>C NMR Spectrum of Compound **3i**

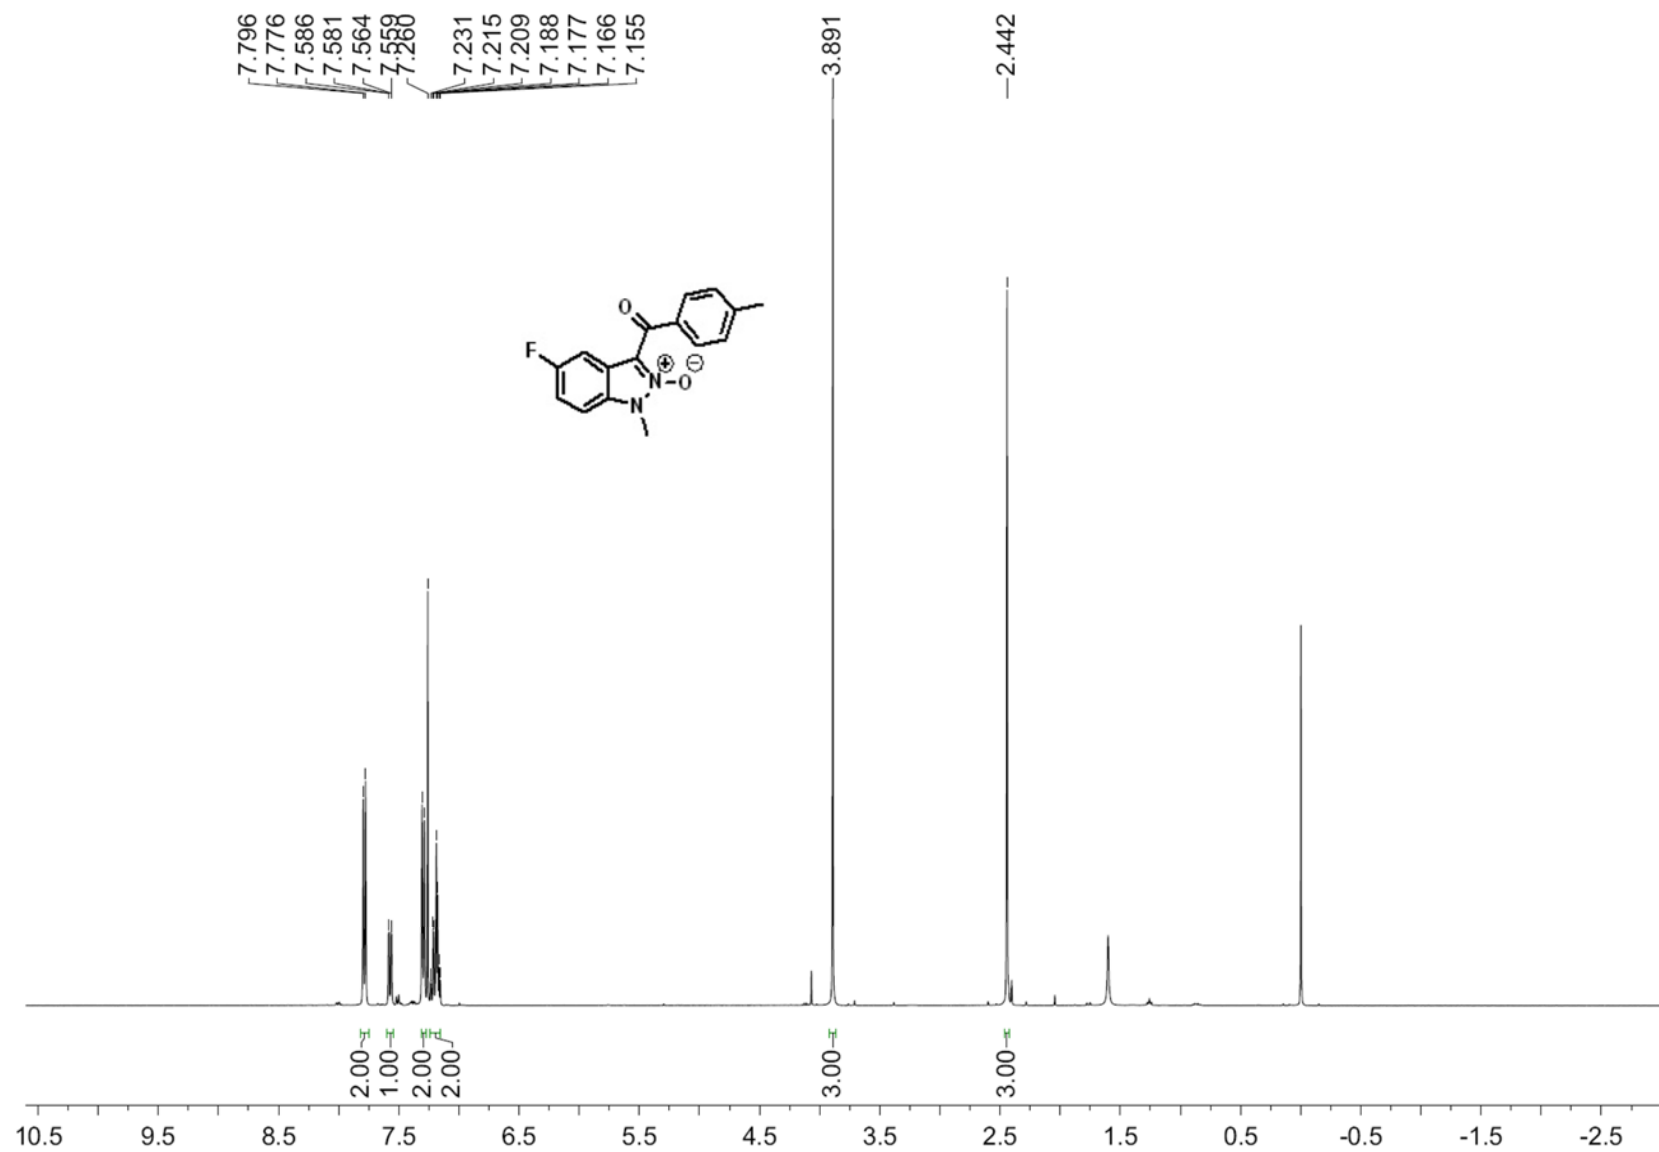

$^1\text{H}$  NMR Spectrum of Compound **3j**



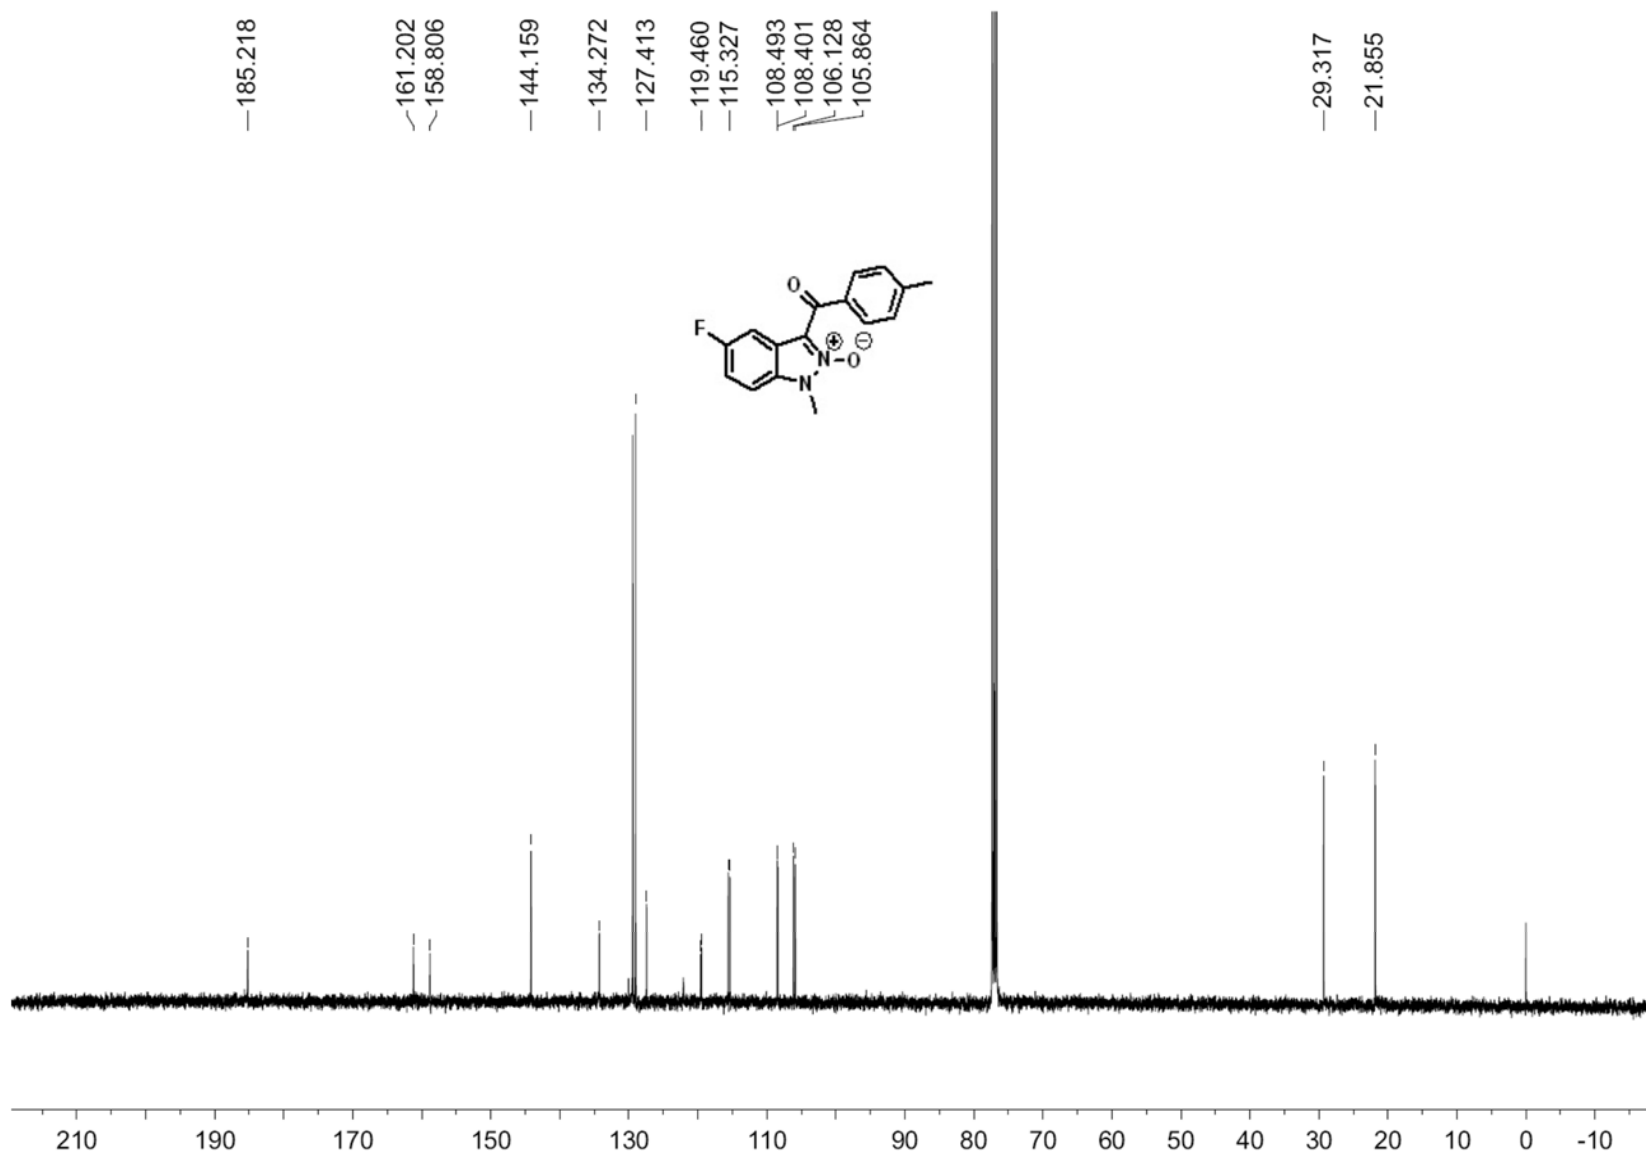

$^{13}\text{C}$  NMR Spectrum of Compound **3j**

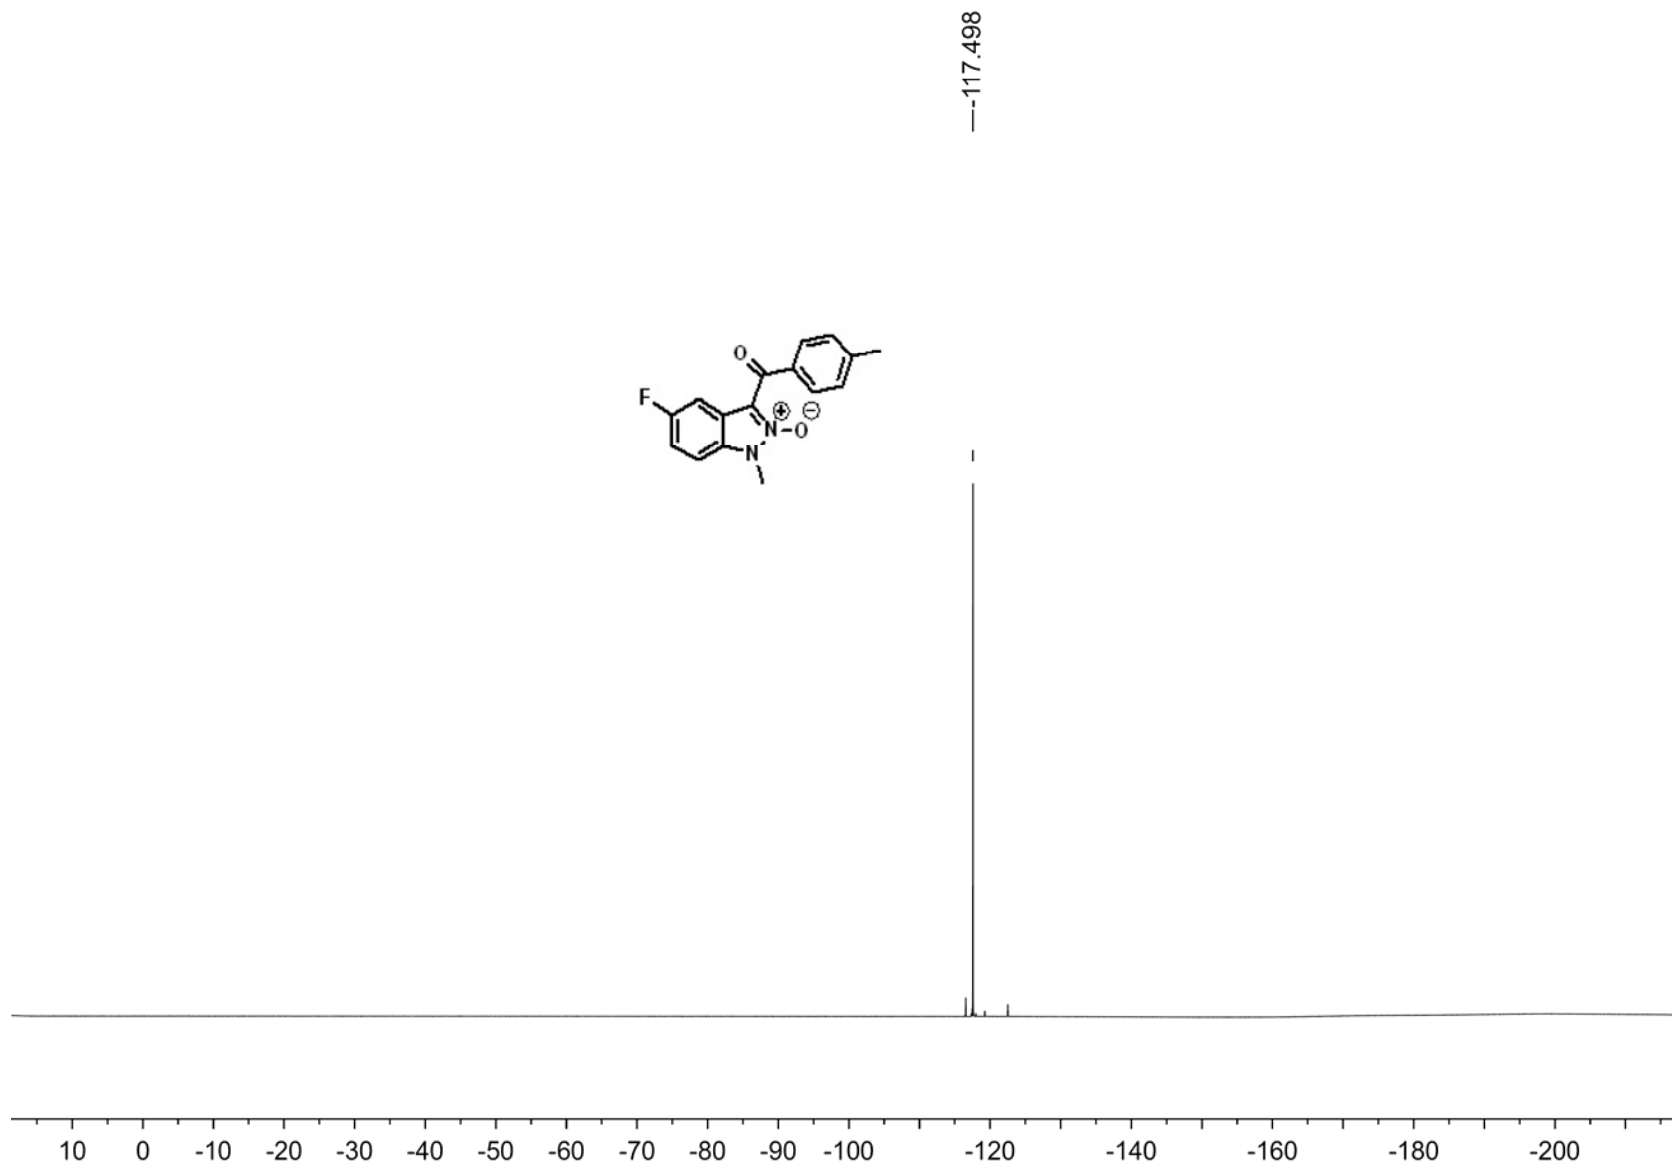

$^{19}\text{F}$  NMR Spectrum of Compound **3j**

S106

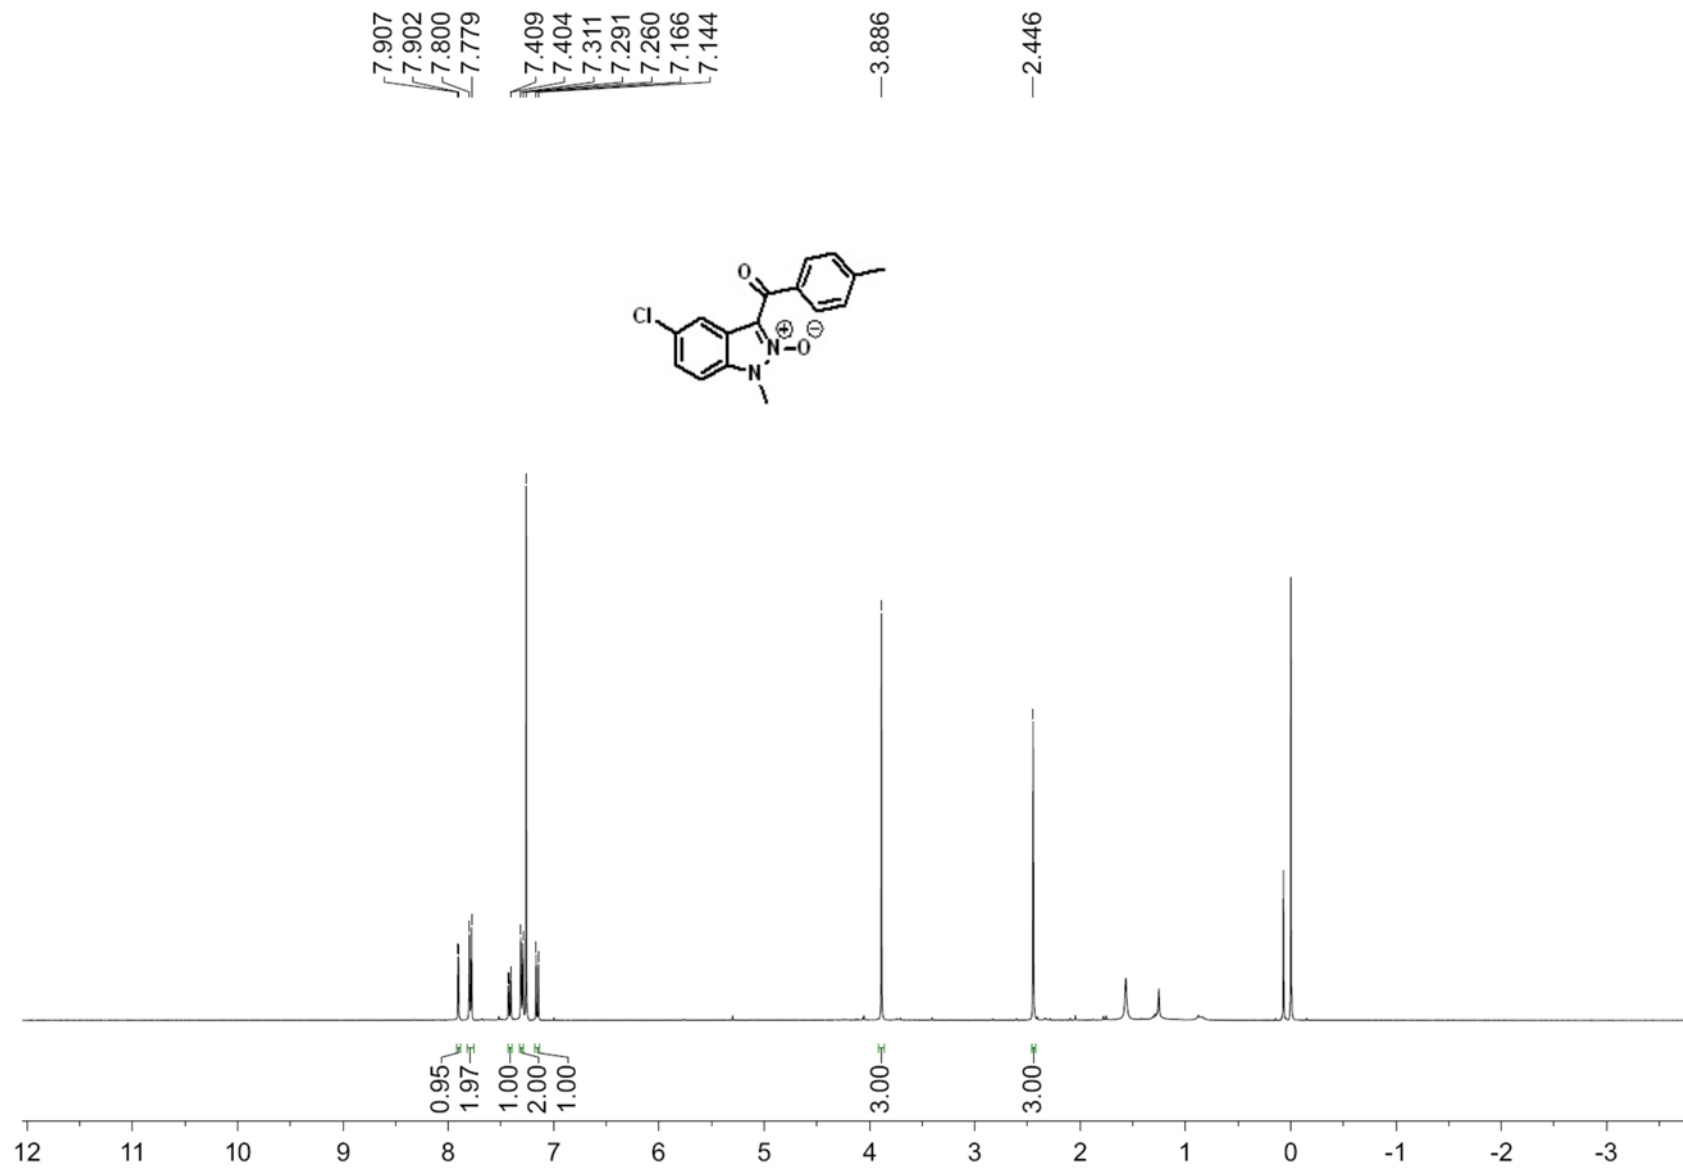

<sup>1</sup>H NMR Spectrum of Compound **3k**

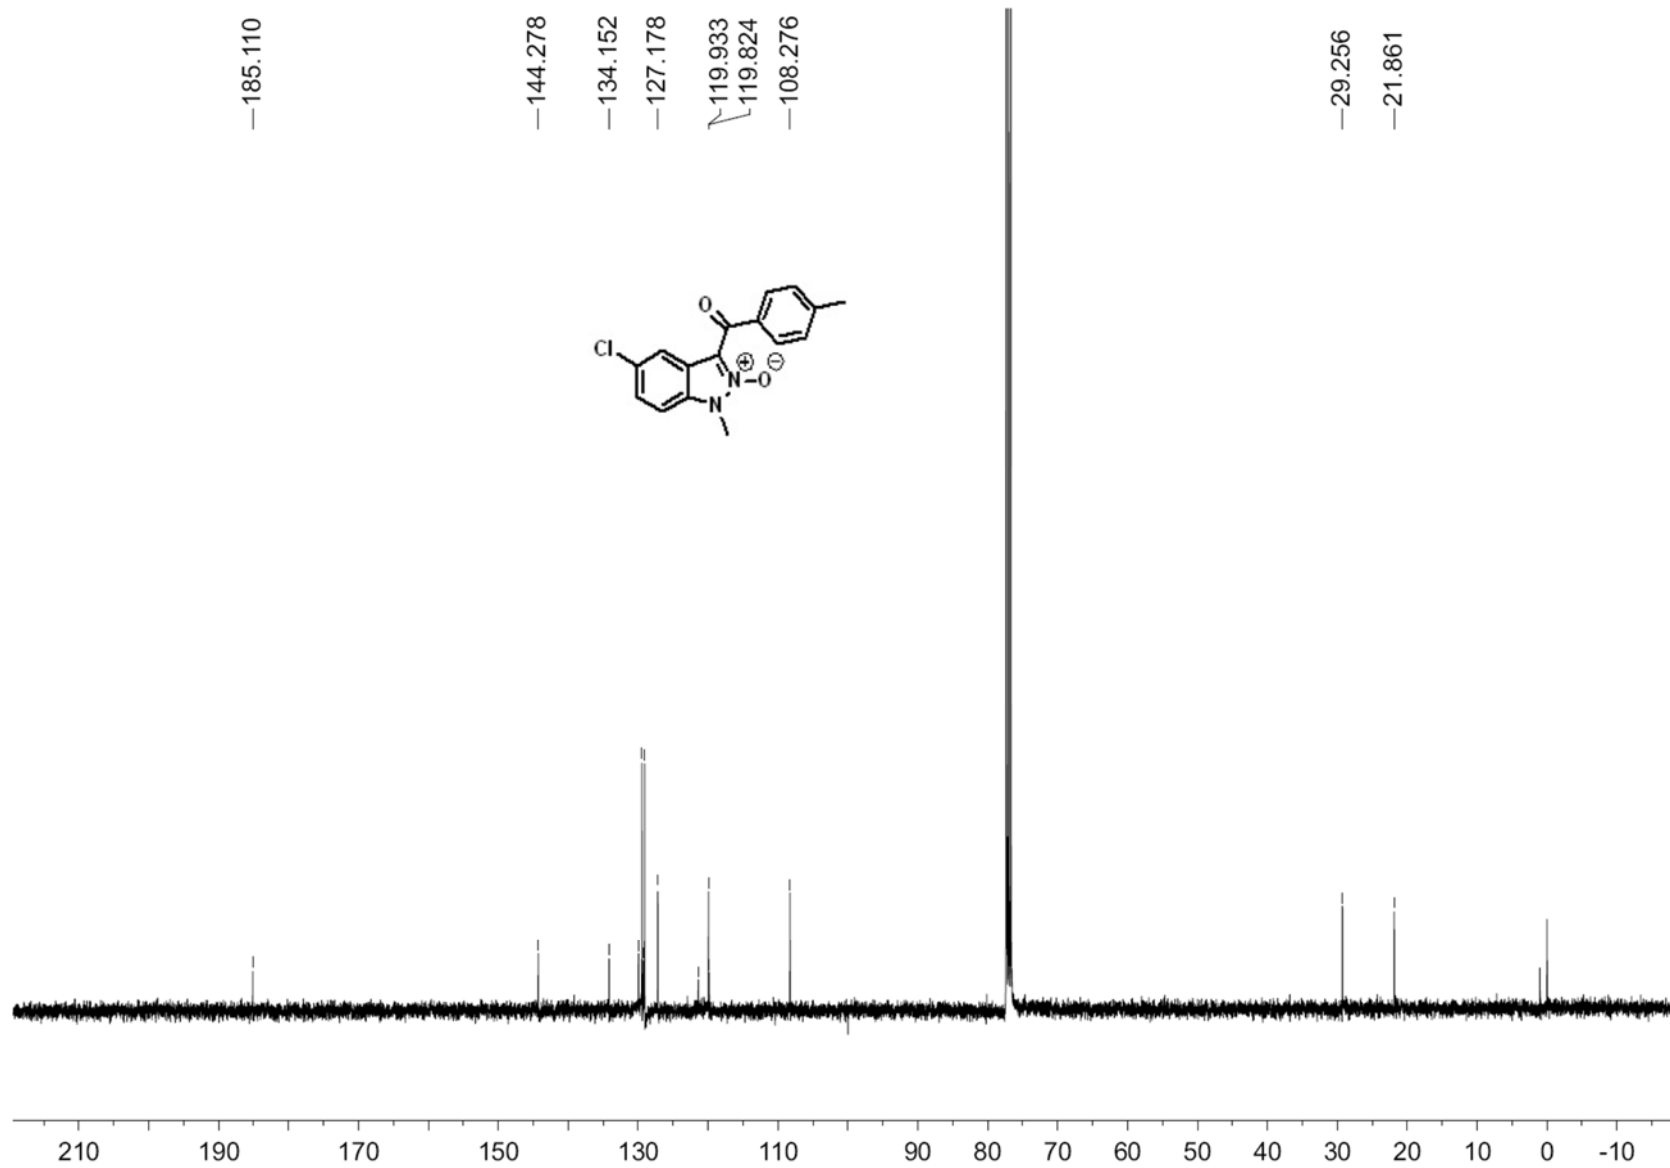

$^{13}\text{C}$  NMR Spectrum of Compound 3k
